# Supplementary material
Source: publisher site journal article supplement (https://www.dovepress.com/article/531967)

**Supplementary Tables**

| **Table S1. Characteristics associated with the levels of 179 lipid species** | | | |
| --- | --- | --- | --- |
| **ID** | **Trait** | **Sample** | **Information** |
| GCST90277238 | CE (27:1/14:0) levels | 7174 | Sterol ester (27:1/14:0) levels |
| GCST90277239 | CE (27:1/15:0) levels | 6428 | Sterol ester (27:1/15:0) levels |
| GCST90277240 | CE (27:1/16:0) levels | 7174 | Sterol ester (27:1/16:0) levels |
| GCST90277241 | CE (27:1/16:1) levels | 7172 | Sterol ester (27:1/16:1) levels |
| GCST90277242 | CE (27:1/17:0) levels | 7047 | Sterol ester (27:1/17:0) levels |
| GCST90277243 | CE (27:1/17:1) levels | 7166 | Sterol ester (27:1/17:1) levels |
| GCST90277244 | CE (27:1/18:0) levels | 7157 | Sterol ester (27:1/18:0) levels |
| GCST90277245 | CE (27:1/18:1) levels | 7174 | Sterol ester (27:1/18:1) levels |
| GCST90277246 | CE (27:1/18:2) levels | 7174 | Sterol ester (27:1/18:2) levels |
| GCST90277247 | CE (27:1/18:3) levels | 7174 | Sterol ester (27:1/18:3) levels |
| GCST90277248 | CE (27:1/20:2) levels | 5848 | Sterol ester (27:1/20:2) levels |
| GCST90277249 | CE (27:1/20:3) levels | 7171 | Sterol ester (27:1/20:3) levels |
| GCST90277250 | CE (27:1/20:4) levels | 7174 | Sterol ester (27:1/20:4) levels |
| GCST90277251 | CE (27:1/20:5) levels | 7174 | Sterol ester (27:1/20:5) levels |
| GCST90277252 | CE (27:1/22:6) levels | 7173 | Sterol ester (27:1/22:6) levels |
| GCST90277253 | CER (d40:1) levels | 7117 | Ceramide (d40:1) levels |
| GCST90277254 | CER (d40:2) levels | 5287 | Ceramide (d40:2) levels |
| GCST90277255 | CER (d42:1) levels | 7174 | Ceramide (d42:1) levels |
| GCST90277256 | CER (d42:2) levels | 7173 | Ceramide (d42:2) levels |
| GCST90277257 | Chol levels | 7166 | Cholesterol levels |
| GCST90277258 | DAG (16:0_18:1) levels | 6293 | Diacylglycerol (16:0_18:1) levels |
| GCST90277259 | DAG (16:0_18:2) levels | 6075 | Diacylglycerol (16:0_18:2) levels |
| GCST90277260 | DAG (16:1_18:1) levels | 6215 | Diacylglycerol (16:1_18:1) levels |
| GCST90277261 | DAG (18:1_18:1) levels | 6884 | Diacylglycerol (18:1_18:1) levels |
| GCST90277262 | DAG (18:1_18:2) levels | 6613 | Diacylglycerol (18:1_18:2) levels |
| GCST90277263 | DAG (18:1_18:3) levels | 6572 | Diacylglycerol (18:1_18:3) levels |
| GCST90277264 | PC (16:0_0:0) levels | 7174 | Phosphatidylcholine (16:0_0:0) levels |
| GCST90277265 | PC (18:0_0:0) levels | 7173 | Phosphatidylcholine (18:0_0:0) levels |
| GCST90277266 | PC (18:1_0:0) levels | 7174 | Phosphatidylcholine (18:1_0:0) levels |
| GCST90277267 | PC (18:2_0:0) levels | 7174 | Phosphatidylcholine (18:2_0:0) levels |
| GCST90277268 | PC (20:4_0:0) levels | 6235 | Phosphatidylcholine (20:4_0:0) levels |
| GCST90277269 | PE (18:0_0:0) levels | 6258 | Phosphatidylethanolamine (18:0_0:0) levels |
| GCST90277270 | PE (18:1_0:0) levels | 5172 | Phosphatidylethanolamine (18:1_0:0) levels |
| GCST90277271 | PE (18:2_0:0) levels | 6905 | Phosphatidylethanolamine (18:2_0:0) levels |
| GCST90277272 | PC (14:0_16:0) levels | 5497 | Phosphatidylcholine (14:0_16:0) levels |
| GCST90277273 | PC (14:0_18:1) levels | 7064 | Phosphatidylcholine (14:0_18:1) levels |
| GCST90277274 | PC (14:0_18:2) levels | 6866 | Phosphatidylcholine (14:0_18:2) levels |
| GCST90277275 | PC (15:0_18:1) levels | 6468 | Phosphatidylcholine (15:0_18:1) levels |
| GCST90277276 | PC (15:0_18:2) levels | 6639 | Phosphatidylcholine (15:0_18:2) levels |
| GCST90277277 | PC (16:0_16:0) levels | 7174 | Phosphatidylcholine (16:0_16:0) levels |
| GCST90277278 | PC (16:0_16:1) levels | 7172 | Phosphatidylcholine (16:0_16:1) levels |
| GCST90277279 | PC (16:0_17:1) levels | 7076 | Phosphatidylcholine (16:0_17:1) levels |
| GCST90277280 | PC (16:0_18:0) levels | 7154 | Phosphatidylcholine (16:0_18:0) levels |
| GCST90277281 | PC (16:0_18:1) levels | 7174 | Phosphatidylcholine (16:0_18:1) levels |
| GCST90277282 | PC (16:0_18:2) levels | 7174 | Phosphatidylcholine (16:0_18:2) levels |
| GCST90277283 | PC (16:0_18:3) levels | 7174 | Phosphatidylcholine (16:0_18:3) levels |
| GCST90277284 | PC (16:0_20:1) levels | 6882 | Phosphatidylcholine (16:0_20:1) levels |
| GCST90277285 | PC (16:0_20:2) levels | 7135 | Phosphatidylcholine (16:0_20:2) levels |
| GCST90277286 | PC (16:0_20:3) levels | 7174 | Phosphatidylcholine (16:0_20:3) levels |
| GCST90277287 | PC (16:0_20:4) levels | 7174 | Phosphatidylcholine (16:0_20:4) levels |
| GCST90277288 | PC (16:0_20:5) levels | 7173 | Phosphatidylcholine (16:0_20:5) levels |
| GCST90277289 | PC (16:0_22:4) levels | 6874 | Phosphatidylcholine (16:0_22:4) levels |
| GCST90277290 | PC (16:0_22:5) levels | 7172 | Phosphatidylcholine (16:0_22:5) levels |
| GCST90277291 | PC (16:0_22:6) levels | 7170 | Phosphatidylcholine (16:0_22:6) levels |
| GCST90277292 | PC (16:1_18:0) levels | 6524 | Phosphatidylcholine (16:1_18:0) levels |
| GCST90277293 | PC (16:1_18:1) levels | 7166 | Phosphatidylcholine (16:1_18:1) levels |
| GCST90277294 | PC (16:1_18:2) levels | 7165 | Phosphatidylcholine (16:1_18:2) levels |
| GCST90277295 | PC (16:1_20:4) levels | 5564 | Phosphatidylcholine (16:1_20:4) levels |
| GCST90277296 | PC (17:0_18:1) levels | 7073 | Phosphatidylcholine (17:0_18:1) levels |
| GCST90277297 | PC (17:0_18:2) levels | 7170 | Phosphatidylcholine (17:0_18:2) levels |
| GCST90277298 | PC (17:0_20:4) levels | 7106 | Phosphatidylcholine (17:0_20:4) levels |
| GCST90277299 | PC (18:0_18:1) levels | 7173 | Phosphatidylcholine (18:0_18:1) levels |
| GCST90277300 | PC (18:0_18:2) levels | 7174 | Phosphatidylcholine (18:0_18:2) levels |
| GCST90277301 | PC (18:0_18:3) levels | 6692 | Phosphatidylcholine (18:0_18:3) levels |
| GCST90277302 | PC (18:0_20:2) levels | 5778 | Phosphatidylcholine (18:0_20:2) levels |
| GCST90277303 | PC (18:0_20:3) levels | 7169 | Phosphatidylcholine (18:0_20:3) levels |
| GCST90277304 | PC (18:0_20:4) levels | 7174 | Phosphatidylcholine (18:0_20:4) levels |
| GCST90277305 | PC (18:0_20:5) levels | 7121 | Phosphatidylcholine (18:0_20:5) levels |
| GCST90277306 | PC (18:0_22:5) levels | 6805 | Phosphatidylcholine (18:0_22:5) levels |
| GCST90277307 | PC (18:0_22:6) levels | 7004 | Phosphatidylcholine (18:0_22:6) levels |
| GCST90277308 | PC (18:1_18:1) levels | 7174 | Phosphatidylcholine (18:1_18:1) levels |
| GCST90277309 | PC (18:1_18:2) levels | 7174 | Phosphatidylcholine (18:1_18:2) levels |
| GCST90277310 | PC (18:1_18:3) levels | 6339 | Phosphatidylcholine (18:1_18:3) levels |
| GCST90277311 | PC (18:1_20:2) levels | 5852 | Phosphatidylcholine (18:1_20:2) levels |
| GCST90277312 | PC (18:1_20:3) levels | 7171 | Phosphatidylcholine (18:1_20:3) levels |
| GCST90277313 | PC (18:1_20:4) levels | 7173 | Phosphatidylcholine (18:1_20:4) levels |
| GCST90277314 | PC (18:2_18:2) levels | 7174 | Phosphatidylcholine (18:2_18:2) levels |
| GCST90277315 | PC (18:2_20:1) levels | 5521 | Phosphatidylcholine (18:2_20:1) levels |
| GCST90277316 | PC (18:2_20:3) levels | 6615 | Phosphatidylcholine (18:2_20:3) levels |
| GCST90277317 | PC (18:2_20:4) levels | 7049 | Phosphatidylcholine (18:2_20:4) levels |
| GCST90277318 | PC (O-16:0_16:0) levels | 6605 | Phosphatidylcholine (O-16:0_16:0) levels |
| GCST90277319 | PC (O-16:0_16:1) levels | 5658 | Phosphatidylcholine (O-16:0_16:1) levels |
| GCST90277320 | PC (O-16:0_18:1) levels | 6956 | Phosphatidylcholine (O-16:0_18:1) levels |
| GCST90277321 | PC (O-16:0_18:2) levels | 7158 | Phosphatidylcholine (O-16:0_18:2) levels |
| GCST90277322 | PC (O-16:0_20:3) levels | 6709 | Phosphatidylcholine (O-16:0_20:3) levels |
| GCST90277323 | PC (O-16:0_20:4) levels | 7174 | Phosphatidylcholine (O-16:0_20:4) levels |
| GCST90277324 | PC (O-16:0_22:5) levels | 5988 | Phosphatidylcholine (O-16:0_22:5) levels |
| GCST90277325 | PC (O-16:1_16:0) levels | 5868 | Phosphatidylcholine (O-16:1_16:0) levels |
| GCST90277326 | PC (O-16:1_18:0) levels | 6751 | Phosphatidylcholine (O-16:1_18:0) levels |
| GCST90277327 | PC (O-16:1_18:1) levels | 7154 | Phosphatidylcholine (O-16:1_18:1) levels |
| GCST90277328 | PC (O-16:1_18:2) levels | 7096 | Phosphatidylcholine (O-16:1_18:2) levels |
| GCST90277329 | PC (O-16:1_20:3) levels | 6770 | Phosphatidylcholine (O-16:1_20:3) levels |
| GCST90277330 | PC (O-16:1_20:4) levels | 6025 | Phosphatidylcholine (O-16:1_20:4) levels |
| GCST90277331 | PC (O-16:2_18:0) levels | 6672 | Phosphatidylcholine (O-16:2_18:0) levels |
| GCST90277332 | PC (O-17:0_15:0) levels | 6140 | Phosphatidylcholine (O-17:0_15:0) levels |
| GCST90277333 | PC (O-17:0_17:1) levels | 6880 | Phosphatidylcholine (O-17:0_17:1) levels |
| GCST90277334 | PC (O-18:0_14:0) levels | 6462 | Phosphatidylcholine (O-18:0_14:0) levels |
| GCST90277335 | PC (O-18:0_16:1) levels | 5959 | Phosphatidylcholine (O-18:0_16:1) levels |
| GCST90277336 | PC (O-18:0_20:4) levels | 6956 | Phosphatidylcholine (O-18:0_20:4) levels |
| GCST90277337 | PC (O-18:1_16:0) levels | 6956 | Phosphatidylcholine (O-18:1_16:0) levels |
| GCST90277338 | PC (O-18:1_18:2) levels | 6718 | Phosphatidylcholine (O-18:1_18:2) levels |
| GCST90277339 | PC (O-18:1_20:3) levels | 6836 | Phosphatidylcholine (O-18:1_20:3) levels |
| GCST90277340 | PC (O-18:1_20:4) levels | 7173 | Phosphatidylcholine (O-18:1_20:4) levels |
| GCST90277341 | PC (O-18:2_16:0) levels | 7158 | Phosphatidylcholine (O-18:2_16:0) levels |
| GCST90277342 | PC (O-18:2_18:1) levels | 6677 | Phosphatidylcholine (O-18:2_18:1) levels |
| GCST90277343 | PC (O-18:2_18:2) levels | 7153 | Phosphatidylcholine (O-18:2_18:2) levels |
| GCST90277344 | PC (O-18:2_20:4) levels | 6127 | Phosphatidylcholine (O-18:2_20:4) levels |
| GCST90277345 | PE (16:0_18:2) levels | 5462 | Phosphatidylethanolamine (16:0_18:2) levels |
| GCST90277346 | PE (16:0_20:4) levels | 6666 | Phosphatidylethanolamine (16:0_20:4) levels |
| GCST90277347 | PE (18:0_18:2) levels | 7128 | Phosphatidylethanolamine (18:0_18:2) levels |
| GCST90277348 | PE (18:0_20:4) levels | 7164 | Phosphatidylethanolamine (18:0_20:4) levels |
| GCST90277349 | PE (18:1_18:1) levels | 7045 | Phosphatidylethanolamine (18:1_18:1) levels |
| GCST90277350 | PE (O-16:1_18:2) levels | 5430 | Phosphatidylethanolamine (O-16:1_18:2) levels |
| GCST90277351 | PE (O-16:1_20:4) levels | 7169 | Phosphatidylethanolamine (O-16:1_20:4) levels |
| GCST90277352 | PE (O-16:1_22:5) levels | 5609 | Phosphatidylethanolamine (O-16:1_22:5) levels |
| GCST90277353 | PE (O-18:1_18:2) levels | 6870 | Phosphatidylethanolamine (O-18:1_18:2) levels |
| GCST90277354 | PE (O-18:1_20:4) levels | 7172 | Phosphatidylethanolamine (O-18:1_20:4) levels |
| GCST90277355 | PE (O-18:2_18:1) levels | 6717 | Phosphatidylethanolamine (O-18:2_18:1) levels |
| GCST90277356 | PE (O-18:2_18:2) levels | 6337 | Phosphatidylethanolamine (O-18:2_18:2) levels |
| GCST90277357 | PE (O-18:2_20:4) levels | 7154 | Phosphatidylethanolamine (O-18:2_20:4) levels |
| GCST90277358 | PI (16:0_18:1) levels | 7157 | Phosphatidylinositol (16:0_18:1) levels |
| GCST90277359 | PI (16:0_18:2) levels | 6998 | Phosphatidylinositol (16:0_18:2) levels |
| GCST90277360 | PI (16:0_20:4) levels | 5519 | Phosphatidylinositol (16:0_20:4) levels |
| GCST90277361 | PI (18:0_18:1) levels | 7162 | Phosphatidylinositol (18:0_18:1) levels |
| GCST90277362 | PI (18:0_18:2) levels | 7170 | Phosphatidylinositol (18:0_18:2) levels |
| GCST90277363 | PI (18:0_20:3) levels | 6784 | Phosphatidylinositol (18:0_20:3) levels |
| GCST90277364 | PI (18:0_20:4) levels | 7174 | Phosphatidylinositol (18:0_20:4) levels |
| GCST90277365 | PI (18:1_18:1) levels | 7164 | Phosphatidylinositol (18:1_18:1) levels |
| GCST90277366 | PI (18:1_18:2) levels | 6489 | Phosphatidylinositol (18:1_18:2) levels |
| GCST90277367 | PI (18:1_20:4) levels | 5882 | Phosphatidylinositol (18:1_20:4) levels |
| GCST90277368 | SM (d32:1) levels | 7174 | Sphingomyelin (d32:1) levels |
| GCST90277369 | SM (d34:0) levels | 6207 | Sphingomyelin (d34:0) levels |
| GCST90277370 | SM (d34:1) levels | 7174 | Sphingomyelin (d34:1) levels |
| GCST90277371 | SM (d34:2) levels | 7174 | Sphingomyelin (d34:2) levels |
| GCST90277372 | SM (d36:1) levels | 7174 | Sphingomyelin (d36:1) levels |
| GCST90277373 | SM (d36:2) levels | 7173 | Sphingomyelin (d36:2) levels |
| GCST90277374 | SM (d38:1) levels | 7174 | Sphingomyelin (d38:1) levels |
| GCST90277375 | SM (d38:2) levels | 7150 | Sphingomyelin (d38:2) levels |
| GCST90277376 | SM (d40:1) levels | 7174 | Sphingomyelin (d40:1) levels |
| GCST90277377 | SM (d40:2) levels | 7174 | Sphingomyelin (d40:2) levels |
| GCST90277378 | SM (d42:2) levels | 7174 | Sphingomyelin (d42:2) levels |
| GCST90277379 | TAG (46:1) levels | 6070 | Triacylglycerol (46:1) levels |
| GCST90277380 | TAG (46:2) levels | 5448 | Triacylglycerol (46:2) levels |
| GCST90277381 | TAG (48:0) levels | 5463 | Triacylglycerol (48:0) levels |
| GCST90277382 | TAG (48:1) levels | 7019 | Triacylglycerol (48:1) levels |
| GCST90277383 | TAG (48:2) levels | 7071 | Triacylglycerol (48:2) levels |
| GCST90277384 | TAG (48:3) levels | 6855 | Triacylglycerol (48:3) levels |
| GCST90277385 | TAG (49:1) levels | 5843 | Triacylglycerol (49:1) levels |
| GCST90277386 | TAG (49:2) levels | 6076 | Triacylglycerol (49:2) levels |
| GCST90277387 | TAG (50:1) levels | 7143 | Triacylglycerol (50:1) levels |
| GCST90277388 | TAG (50:2) levels | 7172 | Triacylglycerol (50:2) levels |
| GCST90277389 | TAG (50:3) levels | 7161 | Triacylglycerol (50:3) levels |
| GCST90277390 | TAG (50:4) levels | 7166 | Triacylglycerol (50:4) levels |
| GCST90277391 | TAG (50:5) levels | 5491 | Triacylglycerol (50:5) levels |
| GCST90277392 | TAG (51:1) levels | 5495 | Triacylglycerol (51:1) levels |
| GCST90277393 | TAG (51:2) levels | 7149 | Triacylglycerol (51:2) levels |
| GCST90277394 | TAG (51:3) levels | 7119 | Triacylglycerol (51:3) levels |
| GCST90277395 | TAG (51:4) levels | 5237 | Triacylglycerol (51:4) levels |
| GCST90277396 | TAG (52:2) levels | 7168 | Triacylglycerol (52:2) levels |
| GCST90277397 | TAG (52:3) levels | 7173 | Triacylglycerol (52:3) levels |
| GCST90277398 | TAG (52:4) levels | 7174 | Triacylglycerol (52:4) levels |
| GCST90277399 | TAG (52:5) levels | 7172 | Triacylglycerol (52:5) levels |
| GCST90277400 | TAG (52:6) levels | 6554 | Triacylglycerol (52:6) levels |
| GCST90277401 | TAG (53:2) levels | 6996 | Triacylglycerol (53:2) levels |
| GCST90277402 | TAG (53:3) levels | 7113 | Triacylglycerol (53:3) levels |
| GCST90277403 | TAG (53:4) levels | 6479 | Triacylglycerol (53:4) levels |
| GCST90277404 | TAG (54:3) levels | 7162 | Triacylglycerol (54:3) levels |
| GCST90277405 | TAG (54:4) levels | 7165 | Triacylglycerol (54:4) levels |
| GCST90277406 | TAG (54:5) levels | 7146 | Triacylglycerol (54:5) levels |
| GCST90277407 | TAG (54:6) levels | 7066 | Triacylglycerol (54:6) levels |
| GCST90277408 | TAG (54:7) levels | 6828 | Triacylglycerol (54:7) levels |
| GCST90277409 | TAG (56:3) levels | 6172 | Triacylglycerol (56:3) levels |
| GCST90277410 | TAG (56:4) levels | 5820 | Triacylglycerol (56:4) levels |
| GCST90277411 | TAG (56:5) levels | 5490 | Triacylglycerol (56:5) levels |
| GCST90277412 | TAG (56:6) levels | 7151 | Triacylglycerol (56:6) levels |
| GCST90277413 | TAG (56:7) levels | 7148 | Triacylglycerol (56:7) levels |
| GCST90277414 | TAG (56:8) levels | 6800 | Triacylglycerol (56:8) levels |
| GCST90277415 | TAG (58:7) levels | 5403 | Triacylglycerol (58:7) levels |
| GCST90277416 | TAG (58:8) levels | 6384 | Triacylglycerol (58:8) levels |
| Note: CE: Cholesteryl Ester; CER: Ceramide; DAG: Diacylglycerol; PC: Phosphatidylcholine; PCO: Phosphatidylcholine Ether; PE: Phosphatidylethanolamine; PEO: Phosphatidylethanolamine Ether; PI: Phosphatidylinositol; Sphingomyelin: SM; Triacylglycerol: TAG. Lipid species are named according to the following notation: Class name<sum of carbon atoms>:<sum of double bonds>;<sum of hydroxyl groups>. Annotation of lipid subspecies includes information about their acyl moieties, as well as information about their sn positions. If the sn positions on the glycerol cannot be resolved, the acyl chains are separated by "_", otherwise by "/". | | | |

| **Table S2. Instrumental variables for lifestyle inclusion** | | | | | | | | | | | | | |
| --- | --- | --- | --- | --- | --- | --- | --- | --- | --- | --- | --- | --- | --- |
| **SNP** | **effect_allele.exposure** | **other_allele.exposure** | **beta.exposure** | **se.exposure** | **id.exposure** | **eaf.exposure** | **exposure** | **mr_keep** | **outcome** | **pval.exposure** | **pval.outcome** | **R2** | **F** |
| rs10415609 | A | G | 0.0318525641026 | 0.00678298258345 | GCST006912_LD6 | 0.122183 | Overall physical activity time | TRUE | PCOS | 2.6e-6 | 0.764045 | 2.4199147804757e-4 | 22.0514858962336 |
| rs10475334 | G | A | 0.0316689646831 | 0.0066460208031 | GCST006912_LD6 | 0.871632 | Overall physical activity time | TRUE | PCOS | 1.9e-6 | 0.954586 | 2.49168937379e-4 | 22.7056952559991 |
| rs10880697 | G | C | -0.02491703 | 0.00470570875665 | GCST006912_LD6 | 0.660948 | Overall physical activity time | TRUE | PCOS | 1.2e-7 | 0.315241 | 3.0765685584292e-4 | 28.0370883403034 |
| rs1105867 | T | C | -0.026766086 | 0.00533887276246 | GCST006912_LD6 | 0.224056 | Overall physical activity time | TRUE | PCOS | 5.4e-7 | 0.154613 | 2.7580909861239e-4 | 25.1339684880785 |
| rs11157124 | A | G | -0.021632075 | 0.00471149008224 | GCST006912_LD6 | 0.662731 | Overall physical activity time | TRUE | PCOS | 4.8e-6 | 0.0261704 | 2.3133275276061e-4 | 21.0799842655385 |
| rs1124167 | G | C | 0.0733800193517 | 0.0160426947267 | GCST006912_LD6 | 0.979785 | Overall physical activity time | TRUE | PCOS | 4.7e-6 | 0.326902 | 2.2959322580923e-4 | 20.9214350706648 |
| rs112779734 | T | C | 0.024116231 | 0.00480331398162 | GCST006912_LD6 | 0.692208 | Overall physical activity time | TRUE | PCOS | 5.4e-7 | 0.194098 | 2.7661426026557e-4 | 25.2073616686757 |
| rs12045968 | T | G | -0.028392719 | 0.00536790033866 | GCST006912_LD6 | 0.782993 | Overall physical activity time | TRUE | PCOS | 1.2e-7 | 0.594426 | 3.0699373968759e-4 | 27.976639319888 |
| rs1220114 | T | A | 0.0237648766328 | 0.00518422835027 | GCST006912_LD6 | 0.74264 | Overall physical activity time | TRUE | PCOS | 4.7e-6 | 0.173242 | 2.3060064106878e-4 | 21.013255873565 |
| rs12448218 | G | A | -0.021828133 | 0.0046948838897 | GCST006912_LD6 | 0.660592 | Overall physical activity time | TRUE | PCOS | 3.2e-6 | 0.861874 | 2.3721284812741e-4 | 21.6159296791963 |
| rs12449794 | C | T | 0.0468925979681 | 0.0100722302854 | GCST006912_LD6 | 0.945641 | Overall physical activity time | TRUE | PCOS | 3.2e-6 | 0.179011 | 2.3785471877747e-4 | 21.6744338111434 |
| rs12460611 | A | G | 0.0228224479923 | 0.00477186744074 | GCST006912_LD6 | 0.677003 | Overall physical activity time | TRUE | PCOS | 1.8e-6 | 0.107701 | 2.510131483336e-4 | 22.8737924752997 |
| rs1268539 | C | A | -0.022268263 | 0.00449669811321 | GCST006912_LD6 | 0.581204 | Overall physical activity time | TRUE | PCOS | 7.2e-7 | 0.459928 | 2.6910770134557e-4 | 24.5231182756745 |
| rs12989603 | A | C | 0.0234660135462 | 0.00482200048379 | GCST006912_LD6 | 0.698387 | Overall physical activity time | TRUE | PCOS | 1e-6 | 0.466185 | 2.5987771783213e-4 | 23.6817940982649 |
| rs159963 | C | A | 0.0208237784228 | 0.00451364296081 | GCST006912_LD6 | 0.422492 | Overall physical activity time | TRUE | PCOS | 4.4e-6 | 0.163745 | 2.3357211843206e-4 | 21.2840920759919 |
| rs1668835 | T | A | -0.024664248 | 0.00480378567973 | GCST006912_LD6 | 0.688304 | Overall physical activity time | TRUE | PCOS | 2.8e-7 | 0.723044 | 2.8926816601746e-4 | 26.3608230756348 |
| rs16860042 | T | C | -0.034797533 | 0.00754088050314 | GCST006912_LD6 | 0.903554 | Overall physical activity time | TRUE | PCOS | 3.8e-6 | 0.476479 | 2.3367329215855e-4 | 21.2933136142137 |
| rs17135735 | C | T | 0.0442914852443 | 0.00866254233188 | GCST006912_LD6 | 0.929242 | Overall physical activity time | TRUE | PCOS | 3e-7 | 0.572576 | 2.8686854600664e-4 | 26.1420844886098 |
| rs2821176 | T | G | 0.0242481857765 | 0.0049834179971 | GCST006912_LD6 | 0.728027 | Overall physical activity time | TRUE | PCOS | 1.1e-6 | 0.727969 | 2.5980578045309e-4 | 23.6752369800389 |
| rs34517439 | C | A | 0.0374040880503 | 0.0068665820029 | GCST006912_LD6 | 0.879088 | Overall physical activity time | TRUE | PCOS | 5.1e-8 | 0.758165 | 3.2559166706639e-4 | 29.6720386132669 |
| rs4075561 | G | T | 0.0208785679729 | 0.00447999516207 | GCST006912_LD6 | 0.430099 | Overall physical activity time | TRUE | PCOS | 3.2e-6 | 0.0292126 | 2.3834200595402e-4 | 21.718848282296 |
| rs4314553 | T | C | 0.0213055152395 | 0.00444118287373 | GCST006912_LD6 | 0.516065 | Overall physical activity time | TRUE | PCOS | 1.6e-6 | 0.432215 | 2.5254272698702e-4 | 23.0132118759827 |
| rs4640189 | C | T | -0.043094944 | 0.00898767537494 | GCST006912_LD6 | 0.9341 | Overall physical activity time | TRUE | PCOS | 1.6e-6 | 0.909281 | 2.522935206475e-4 | 22.9904969649701 |
| rs5742915 | T | C | -0.023020561 | 0.00445587808418 | GCST006912_LD6 | 0.539323 | Overall physical activity time | TRUE | PCOS | 2.4e-7 | 0.58742 | 2.9288409290955e-4 | 26.6904367206872 |
| rs6081105 | A | G | -0.022797654 | 0.00454747218191 | GCST006912_LD6 | 0.398758 | Overall physical activity time | TRUE | PCOS | 5.1e-7 | 0.845168 | 2.7578979754764e-4 | 25.1322091328518 |
| rs62125156 | A | C | 0.0255151185293 | 0.00544915336236 | GCST006912_LD6 | 0.787539 | Overall physical activity time | TRUE | PCOS | 3.1e-6 | 0.647321 | 2.4059710832792e-4 | 21.9243933056298 |
| rs651165 | G | A | 0.0242602805999 | 0.00528537735849 | GCST006912_LD6 | 0.770018 | Overall physical activity time | TRUE | PCOS | 4.4e-6 | 0.266242 | 2.3120488427797e-4 | 21.0683296731007 |
| rs6541235 | C | T | 0.0296313497823 | 0.00622492743106 | GCST006912_LD6 | 0.852189 | Overall physical activity time | TRUE | PCOS | 1.9e-6 | 0.735243 | 2.4864748589624e-4 | 22.6581658035672 |
| rs6775319 | A | T | 0.0274283986454 | 0.00498977987421 | GCST006912_LD6 | 0.270707 | Overall physical activity time | TRUE | PCOS | 3.9e-8 | 0.158628 | 3.3155219248719e-4 | 30.2154173800403 |
| rs6945984 | T | C | -0.033497823 | 0.0071602805999 | GCST006912_LD6 | 0.892618 | Overall physical activity time | TRUE | PCOS | 3e-6 | 0.361113 | 2.4017430901199e-4 | 21.8858564943808 |
| rs73249344 | A | G | -0.026365868 | 0.00572225447508 | GCST006912_LD6 | 0.813863 | Overall physical activity time | TRUE | PCOS | 4.5e-6 | 0.654159 | 2.3297344523839e-4 | 21.2295256972959 |
| rs73715570 | C | T | -0.024945936 | 0.00532487905177 | GCST006912_LD6 | 0.770322 | Overall physical activity time | TRUE | PCOS | 2.7e-6 | 0.43539 | 2.4084259353777e-4 | 21.9467685157214 |
| rs75321673 | A | G | -0.053652153 | 0.0115383164006 | GCST006912_LD6 | 0.959445 | Overall physical activity time | TRUE | PCOS | 3.7e-6 | 0.257316 | 2.3727072046991e-4 | 21.6212045257456 |
| rs7557793 | T | C | -0.024758466 | 0.00535799467828 | GCST006912_LD6 | 0.778515 | Overall physical activity time | TRUE | PCOS | 3.9e-6 | 0.665357 | 2.3431437732705e-4 | 21.3517457386342 |
| rs7591144 | G | A | -0.021028181 | 0.00453649008224 | GCST006912_LD6 | 0.6128 | Overall physical activity time | TRUE | PCOS | 3.4e-6 | 0.843624 | 2.3578645543328e-4 | 21.4859195381479 |
| rs75972257 | C | A | 0.0389059022738 | 0.00792913642961 | GCST006912_LD6 | 0.911594 | Overall physical activity time | TRUE | PCOS | 9.6e-7 | 0.432412 | 2.6419356597786e-4 | 24.0751869507736 |
| rs76223101 | G | A | -0.050885462 | 0.0103763909047 | GCST006912_LD6 | 0.948627 | Overall physical activity time | TRUE | PCOS | 9.3e-7 | 0.384744 | 2.6389912971705e-4 | 24.0483487529198 |
| rs7626095 | C | T | -0.021714441 | 0.00453763909047 | GCST006912_LD6 | 0.562404 | Overall physical activity time | TRUE | PCOS | 1.7e-6 | 0.341907 | 2.5129627578419e-4 | 22.8995991967626 |
| rs7658462 | C | T | 0.0301620706338 | 0.00590010885341 | GCST006912_LD6 | 0.828384 | Overall physical activity time | TRUE | PCOS | 3.3e-7 | 0.790478 | 2.8677116686917e-4 | 26.1332078657965 |
| rs78982639 | G | A | 0.100686986 | 0.0210082244799 | GCST006912_LD6 | 0.988574 | Overall physical activity time | TRUE | PCOS | 1.6e-6 | 0.712208 | 2.5206716961302e-4 | 22.9698653021884 |
| rs791273 | A | G | -0.025514151 | 0.00511964199323 | GCST006912_LD6 | 0.748204 | Overall physical activity time | TRUE | PCOS | 6.2e-7 | 0.121625 | 2.7253511462252e-4 | 24.8355351028621 |
| rs79980391 | T | A | -0.028279511 | 0.00583006773101 | GCST006912_LD6 | 0.820047 | Overall physical activity time | TRUE | PCOS | 1.2e-6 | 0.772247 | 2.5819168021742e-4 | 23.5281114054642 |
| rs9293503 | T | C | 0.0390801886792 | 0.00716405418481 | GCST006912_LD6 | 0.888422 | Overall physical activity time | TRUE | PCOS | 5e-8 | 0.130803 | 3.265213156582e-4 | 29.7567876458612 |
| rs9300002 | T | C | -0.021687107 | 0.00450696661829 | GCST006912_LD6 | 0.578954 | Overall physical activity time | TRUE | PCOS | 1.4e-6 | 0.0420194 | 2.5408672959715e-4 | 23.1539464370171 |
| rs945890 | A | T | -0.025670658 | 0.00492636671505 | GCST006912_LD6 | 0.287237 | Overall physical activity time | TRUE | PCOS | 1.9e-7 | 0.0152311 | 2.9795377642409e-4 | 27.1525731052604 |
| rs9529057 | G | A | -0.020997702 | 0.00444925012095 | GCST006912_LD6 | 0.526466 | Overall physical activity time | TRUE | PCOS | 2.3e-6 | 0.246538 | 2.4441143524886e-4 | 22.2720585312688 |
| rs9938281 | A | G | -0.023873488 | 0.00447631833575 | GCST006912_LD6 | 0.473981 | Overall physical activity time | TRUE | PCOS | 9.6e-8 | 0.259574 | 3.1211313490962e-4 | 28.4433204635888 |
| rs10067113 | C | T | -0.016251 | 0.00277635 | GCST007576_LD8 | 0.380901 | Chronotype | TRUE | PCOS | 6.3e-9 | 0.925672 | 7.61768386888043e-5 | 34.2617719706699 |
| rs10149448 | A | G | 0.0164465 | 0.00275282 | GCST007576_LD8 | 0.603599 | Chronotype | TRUE | PCOS | 2.7e-9 | 0.582353 | 7.93599088703453e-5 | 35.6935231708242 |
| rs1027742 | A | G | 0.0183119 | 0.00306482 | GCST007576_LD8 | 0.737765 | Chronotype | TRUE | PCOS | 2.8e-9 | 0.109351 | 7.93718816668592e-5 | 35.698908575347 |
| rs10280205 | T | C | 0.0174497 | 0.00291239 | GCST007576_LD8 | 0.691748 | Chronotype | TRUE | PCOS | 1.4e-9 | 0.87607 | 7.98153607655719e-5 | 35.8983870705371 |
| rs10402849 | C | T | -0.0192609 | 0.00335946 | GCST007576_LD8 | 0.798647 | Chronotype | TRUE | PCOS | 8.9e-9 | 0.0301634 | 7.3084745832696e-5 | 32.8709512779495 |
| rs10495976 | A | T | -0.0178512 | 0.00276698 | GCST007576_LD8 | 0.609779 | Chronotype | TRUE | PCOS | 5.1e-11 | 0.475652 | 9.25394424617303e-5 | 41.6218001953832 |
| rs1064213 | G | A | -0.019141 | 0.00268602 | GCST007576_LD8 | 0.522312 | Chronotype | TRUE | PCOS | 1.3e-12 | 0.421977 | 1.1290313592989e-4 | 50.7818865622627 |
| rs10742179 | A | G | 0.0182967 | 0.00306465 | GCST007576_LD8 | 0.260177 | Chronotype | TRUE | PCOS | 1.5e-9 | 0.315375 | 7.92489703849191e-5 | 35.6436226695478 |
| rs10823233 | T | C | -0.0151686 | 0.00270212 | GCST007576_LD8 | 0.452113 | Chronotype | TRUE | PCOS | 4.3e-8 | 0.321562 | 7.00641057036441e-5 | 31.5122782659066 |
| rs10988239 | C | T | 0.0186334 | 0.00273304 | GCST007576_LD8 | 0.48728 | Chronotype | TRUE | PCOS | 1.6e-11 | 0.719774 | 1.0334551452019e-4 | 46.4825887032411 |
| rs11032362 | G | A | -0.0395538 | 0.00467579 | GCST007576_LD8 | 0.909237 | Chronotype | TRUE | PCOS | 4.8e-17 | 0.377076 | 1.5908953486436e-4 | 71.5590389878488 |
| rs1113295 | T | G | 0.0156591 | 0.00270408 | GCST007576_LD8 | 0.440869 | Chronotype | TRUE | PCOS | 6.8e-9 | 0.217759 | 7.4560089253394407e-05 | 33.5345583997749 |
| rs11227452 | G | A | -0.0194632 | 0.00358768 | GCST007576_LD8 | 0.828358 | Chronotype | TRUE | PCOS | 4.6e-8 | 0.651962 | 6.54360311701313e-5 | 29.4306029920602 |
| rs114352914 | G | A | -0.0197917 | 0.00344154 | GCST007576_LD8 | 0.811888 | Chronotype | TRUE | PCOS | 7.9e-9 | 0.45938 | 7.35314107834838e-5 | 33.0718602550195 |
| rs114670539 | C | T | -0.0342784 | 0.00580825 | GCST007576_LD8 | 0.942104 | Chronotype | TRUE | PCOS | 4.6e-9 | 8.69581e-4 | 7.74392482108177e-5 | 34.8296051547861 |
| rs114848860 | A | T | -0.0555837 | 0.00872612 | GCST007576_LD8 | 0.975537 | Chronotype | TRUE | PCOS | 3.6e-10 | 0.566834 | 9.0210614705823e-5 | 40.5742604018513 |
| rs114870822 | G | A | -0.0697522 | 0.0120259 | GCST007576_LD8 | 0.987267 | Chronotype | TRUE | PCOS | 2e-9 | 0.922638 | 7.47984220521e-5 | 33.6417602969203 |
| rs11587758 | G | A | -0.0241103 | 0.0027375 | GCST007576_LD8 | 0.604485 | Chronotype | TRUE | PCOS | 5.5e-19 | 0.935689 | 1.7245125138517e-4 | 77.57022327 |
| rs11588913 | G | A | 0.0154525 | 0.00273856 | GCST007576_LD8 | 0.601681 | Chronotype | TRUE | PCOS | 1.5e-8 | 0.992907 | 7.07891206649344e-5 | 31.838386626275 |
| rs11670534 | C | T | 0.0209755 | 0.00362802 | GCST007576_LD8 | 0.834382 | Chronotype | TRUE | PCOS | 8.5e-9 | 0.51809 | 7.43185623963119e-5 | 33.4259198699296 |
| rs11712056 | T | C | 0.0200896 | 0.00270384 | GCST007576_LD8 | 0.556296 | Chronotype | TRUE | PCOS | 1.6e-13 | 0.098712 | 1.22735889323e-4 | 55.2050326157853 |
| rs11748798 | G | T | 0.0203788 | 0.00309922 | GCST007576_LD8 | 0.749832 | Chronotype | TRUE | PCOS | 5.2e-11 | 0.73325 | 9.61291119597017e-5 | 43.2364940656394 |
| rs11786306 | G | C | -0.0183309 | 0.00283083 | GCST007576_LD8 | 0.646022 | Chronotype | TRUE | PCOS | 8.7e-11 | 0.497822 | 9.32274458332135e-5 | 41.9312748151143 |
| rs11924337 | G | C | -0.0190701 | 0.00301826 | GCST007576_LD8 | 0.727554 | Chronotype | TRUE | PCOS | 2.2e-10 | 0.272719 | 8.87561335242046e-5 | 39.9200165884302 |
| rs12140153 | G | T | 0.0340109 | 0.00468803 | GCST007576_LD8 | 0.904737 | Chronotype | TRUE | PCOS | 1.6e-13 | 0.882486 | 1.1701699469665e-4 | 52.6324459495635 |
| rs12432176 | C | A | -0.0161131 | 0.00278357 | GCST007576_LD8 | 0.620705 | Chronotype | TRUE | PCOS | 6.5e-9 | 0.0420533 | 7.4501639818591e-5 | 33.5082678998006 |
| rs12541362 | A | T | -0.0213568 | 0.00282446 | GCST007576_LD8 | 0.649758 | Chronotype | TRUE | PCOS | 3.5e-14 | 0.0867381 | 1.2711317728654e-4 | 57.174131032888 |
| rs12811046 | A | G | 0.0169679 | 0.00270358 | GCST007576_LD8 | 0.553343 | Chronotype | TRUE | PCOS | 6.2e-10 | 0.267222 | 8.75757741369043e-5 | 39.3890775831001 |
| rs12927162 | A | G | 0.0286498 | 0.00300067 | GCST007576_LD8 | 0.721593 | Chronotype | TRUE | PCOS | 6.800000000000001e-22 | 0.753692 | 2.0265763627758e-4 | 91.1600983684496 |
| rs12969848 | C | T | -0.0218632 | 0.00270301 | GCST007576_LD8 | 0.470141 | Chronotype | TRUE | PCOS | 1.3e-15 | 0.921033 | 1.4544984280305e-4 | 65.4229644634022 |
| rs13011556 | C | G | -0.0227424 | 0.00316075 | GCST007576_LD8 | 0.761404 | Chronotype | TRUE | PCOS | 1.1e-12 | 0.09846 | 1.1510298362044e-4 | 51.7714540784194 |
| rs13065394 | G | T | 0.017504 | 0.00296404 | GCST007576_LD8 | 0.711537 | Chronotype | TRUE | PCOS | 3e-9 | 0.803125 | 7.75384457766303e-5 | 34.8742243891723 |
| rs13255030 | A | G | 0.0162198 | 0.00273214 | GCST007576_LD8 | 0.585145 | Chronotype | TRUE | PCOS | 2.8e-9 | 0.947626 | 7.83601639522628e-5 | 35.2438349672654 |
| rs13316611 | G | T | -0.0178305 | 0.0030789 | GCST007576_LD8 | 0.743413 | Chronotype | TRUE | PCOS | 1.7e-8 | 0.128833 | 7.45671886236087e-5 | 33.537751689929 |
| rs139911 | C | T | 0.0233915 | 0.00273231 | GCST007576_LD8 | 0.423865 | Chronotype | TRUE | PCOS | 2.3e-17 | 0.97764 | 1.6294074947719e-4 | 73.2916113339596 |
| rs140206235 | C | T | -0.0553854 | 0.00996801 | GCST007576_LD8 | 0.980731 | Chronotype | TRUE | PCOS | 2.3e-8 | 0.89235 | 6.86417156489084e-5 | 30.872495203252 |
| rs1421085 | T | C | -0.0275621 | 0.00274075 | GCST007576_LD8 | 0.596882 | Chronotype | TRUE | PCOS | 1.5e-23 | 0.145285 | 2.2481867946301e-4 | 101.130890465509 |
| rs149611468 | T | C | 0.0776374 | 0.0125983 | GCST007576_LD8 | 0.988036 | Chronotype | TRUE | PCOS | 8.5e-10 | 0.880346 | 8.44356169344069e-5 | 37.9766054532552 |
| rs17161045 | T | C | 0.0206395 | 0.0028029 | GCST007576_LD8 | 0.630545 | Chronotype | TRUE | PCOS | 7.2e-14 | 0.0954927 | 1.2055217692247e-4 | 54.2227082972201 |
| rs17267683 | C | G | 0.0197414 | 0.00316651 | GCST007576_LD8 | 0.76125 | Chronotype | TRUE | PCOS | 2.7e-10 | 0.0161976 | 8.64173441307125e-5 | 38.8680038802606 |
| rs17448682 | C | T | -0.0221528 | 0.00318247 | GCST007576_LD8 | 0.768048 | Chronotype | TRUE | PCOS | 2.2e-12 | 0.811894 | 1.0772738229835e-4 | 48.4536708829323 |
| rs17575798 | G | A | 0.0225553 | 0.00339377 | GCST007576_LD8 | 0.807172 | Chronotype | TRUE | PCOS | 4.2e-11 | 0.0447404 | 9.82050971316624e-5 | 44.1703124930455 |
| rs17604349 | G | A | 0.0257422 | 0.00351443 | GCST007576_LD8 | 0.820797 | Chronotype | TRUE | PCOS | 1.7e-13 | 0.439012 | 1.1928174866773e-4 | 53.6512190030581 |
| rs1800828 | C | G | 0.0176235 | 0.00308462 | GCST007576_LD8 | 0.746407 | Chronotype | TRUE | PCOS | 1.7e-8 | 0.845263 | 7.25761194496156e-5 | 32.6421723945173 |
| rs1947198 | C | T | -0.0241964 | 0.00409707 | GCST007576_LD8 | 0.877845 | Chronotype | TRUE | PCOS | 1.8e-9 | 0.157849 | 7.75470607372679e-5 | 34.8780994135866 |
| rs1952923 | G | A | 0.016877 | 0.00305963 | GCST007576_LD8 | 0.260667 | Chronotype | TRUE | PCOS | 3.6e-8 | 0.951081 | 6.76499651264845e-5 | 30.4264124620061 |
| rs197273 | A | G | 0.0158713 | 0.00269376 | GCST007576_LD8 | 0.470208 | Chronotype | TRUE | PCOS | 1.3e-8 | 0.0636473 | 7.71823432085819e-5 | 34.7140488875173 |
| rs202157 | C | T | 0.0255486 | 0.0029433 | GCST007576_LD8 | 0.298716 | Chronotype | TRUE | PCOS | 4.1e-18 | 0.912029 | 1.6750843348879e-4 | 75.3465239879853 |
| rs2072727 | T | C | 0.016352 | 0.00271514 | GCST007576_LD8 | 0.435988 | Chronotype | TRUE | PCOS | 8.5e-10 | 0.539261 | 8.06429776648801e-5 | 36.2706526046097 |
| rs2239626 | T | C | -0.0202758 | 0.00292696 | GCST007576_LD8 | 0.695411 | Chronotype | TRUE | PCOS | 2.3e-12 | 0.360519 | 1.0668917677292e-4 | 47.9866565053197 |
| rs226090 | C | T | 0.0208783 | 0.00359523 | GCST007576_LD8 | 0.168356 | Chronotype | TRUE | PCOS | 4.1e-9 | 0.359435 | 7.49805501931608e-5 | 33.723681419658 |
| rs2311837 | T | C | -0.0151285 | 0.00272441 | GCST007576_LD8 | 0.591721 | Chronotype | TRUE | PCOS | 3.6e-8 | 0.131522 | 6.85585005647885e-5 | 30.8350655818646 |
| rs231398 | G | A | 0.0207867 | 0.00367183 | GCST007576_LD8 | 0.837853 | Chronotype | TRUE | PCOS | 8.4e-9 | 0.582441 | 7.12556483689793e-5 | 32.048228869605 |
| rs2422413 | T | C | -0.0162894 | 0.0027689 | GCST007576_LD8 | 0.622358 | Chronotype | TRUE | PCOS | 3.6e-9 | 0.5277 | 7.694962213412e-5 | 34.6093706396151 |
| rs2518022 | T | C | 0.0403075 | 0.00485089 | GCST007576_LD8 | 0.0836026 | Chronotype | TRUE | PCOS | 4.8e-17 | 0.0330522 | 1.5349932907428e-4 | 69.0441584952399 |
| rs2653349 | A | G | 0.0387249 | 0.00327448 | GCST007576_LD8 | 0.214552 | Chronotype | TRUE | PCOS | 5.2e-32 | 0.475653 | 3.1088886379475e-4 | 139.860151455719 |
| rs2712056 | C | T | -0.022175 | 0.00345992 | GCST007576_LD8 | 0.815336 | Chronotype | TRUE | PCOS | 5.1e-11 | 0.775579 | 9.13271187366743e-5 | 41.0764791601716 |
| rs28380327 | A | T | 0.0205097 | 0.00277698 | GCST007576_LD8 | 0.629124 | Chronotype | TRUE | PCOS | 2.9e-13 | 0.648094 | 1.2127316692032e-4 | 54.5470389975787 |
| rs28458909 | C | T | 0.0432803 | 0.00407749 | GCST007576_LD8 | 0.876368 | Chronotype | TRUE | PCOS | 2.6e-26 | 0.359495 | 2.5045529001869e-4 | 112.665976280454 |
| rs28634184 | C | T | 0.0176363 | 0.00310689 | GCST007576_LD8 | 0.749137 | Chronotype | TRUE | PCOS | 2.8e-8 | 0.306397 | 7.1643429003345e-5 | 32.2226511537526 |
| rs2881955 | C | T | -0.0161216 | 0.00300229 | GCST007576_LD8 | 0.72122 | Chronotype | TRUE | PCOS | 4.3e-8 | 0.19027 | 6.41102452632174e-5 | 28.8342773953131 |
| rs2949923 | A | G | -0.016206 | 0.00270197 | GCST007576_LD8 | 0.538377 | Chronotype | TRUE | PCOS | 2.1e-9 | 0.857452 | 7.99834557647956e-5 | 35.973996852599 |
| rs2968511 | C | G | -0.0174599 | 0.00291928 | GCST007576_LD8 | 0.695292 | Chronotype | TRUE | PCOS | 4.9e-9 | 0.0807849 | 7.95319694236241e-5 | 35.770916604271 |
| rs2971970 | T | G | 0.0188272 | 0.00325601 | GCST007576_LD8 | 0.218075 | Chronotype | TRUE | PCOS | 6e-9 | 0.876193 | 7.43381937796611e-5 | 33.4347500438423 |
| rs308521 | T | C | 0.0199718 | 0.00275427 | GCST007576_LD8 | 0.602627 | Chronotype | TRUE | PCOS | 3.7e-13 | 0.469298 | 1.1690010455446e-4 | 52.5798644131367 |
| rs3100052 | A | G | 0.0170795 | 0.00276058 | GCST007576_LD8 | 0.387351 | Chronotype | TRUE | PCOS | 6.9e-10 | 0.707092 | 8.51053665949809e-5 | 38.2778643811746 |
| rs3168135 | G | A | 0.0207725 | 0.0031468 | GCST007576_LD8 | 0.760045 | Chronotype | TRUE | PCOS | 2.9e-11 | 0.693364 | 9.68816336721688e-5 | 43.5749924911116 |
| rs34239319 | G | T | -0.0280114 | 0.00443834 | GCST007576_LD8 | 0.897879 | Chronotype | TRUE | PCOS | 3.9e-10 | 0.287202 | 8.85593274314096e-5 | 39.8314908944269 |
| rs34340407 | T | C | -0.0184548 | 0.0031152 | GCST007576_LD8 | 0.753393 | Chronotype | TRUE | PCOS | 4.3e-9 | 0.576624 | 7.80292094784253e-5 | 35.0949708699848 |
| rs34619169 | G | A | -0.0169119 | 0.00291571 | GCST007576_LD8 | 0.692285 | Chronotype | TRUE | PCOS | 3.8e-9 | 0.20851 | 7.48010928162377e-5 | 33.6429616047258 |
| rs35524253 | G | A | -0.015862 | 0.00281259 | GCST007576_LD8 | 0.642782 | Chronotype | TRUE | PCOS | 5.8e-9 | 0.106955 | 7.07158230279017e-5 | 31.8054176682715 |
| rs359250 | G | T | -0.0168642 | 0.0027885 | GCST007576_LD8 | 0.363664 | Chronotype | TRUE | PCOS | 9.2e-10 | 0.4024 | 8.13203333924441e-5 | 36.5753304953205 |
| rs3760185 | C | T | 0.0241586 | 0.0031496 | GCST007576_LD8 | 0.751745 | Chronotype | TRUE | PCOS | 2.6e-14 | 0.117522 | 1.3080374854855e-4 | 58.8343271927795 |
| rs3808477 | C | T | -0.0215613 | 0.00299116 | GCST007576_LD8 | 0.718601 | Chronotype | TRUE | PCOS | 2.8e-13 | 0.243649 | 1.1552200040324e-4 | 51.9599428018875 |
| rs3808964 | G | T | -0.0157096 | 0.00279601 | GCST007576_LD8 | 0.365271 | Chronotype | TRUE | PCOS | 2.7e-8 | 0.728289 | 7.01886045942256e-5 | 31.5682772547002 |
| rs3816454 | T | G | 0.020082 | 0.00278156 | GCST007576_LD8 | 0.374768 | Chronotype | TRUE | PCOS | 4.9e-13 | 0.271861 | 1.1588600929886e-4 | 52.1236871400873 |
| rs3850174 | T | A | 0.0194471 | 0.00309938 | GCST007576_LD8 | 0.742891 | Chronotype | TRUE | PCOS | 6.8e-10 | 0.77512 | 8.753188970938e-5 | 39.3693378953215 |
| rs4141920 | G | A | 0.0155932 | 0.00270207 | GCST007576_LD8 | 0.543867 | Chronotype | TRUE | PCOS | 4.6e-9 | 0.641468 | 7.40439241820879e-5 | 33.3023879497472 |
| rs4237555 | C | T | -0.0164771 | 0.00269332 | GCST007576_LD8 | 0.473046 | Chronotype | TRUE | PCOS | 6e-10 | 0.564793 | 8.32134983684965e-5 | 37.4268874705001 |
| rs4239386 | T | A | 0.0218962 | 0.00285562 | GCST007576_LD8 | 0.665104 | Chronotype | TRUE | PCOS | 1e-14 | 0.54975 | 1.3071462419654e-4 | 58.7942346354463 |
| rs4241964 | T | G | -0.020735 | 0.00270449 | GCST007576_LD8 | 0.524911 | Chronotype | TRUE | PCOS | 1.1e-14 | 0.754555 | 1.3068472807968e-4 | 58.7807858797536 |
| rs4246036 | C | T | 0.0237433 | 0.00295896 | GCST007576_LD8 | 0.292331 | Chronotype | TRUE | PCOS | 2.4e-15 | 0.0062829 | 1.4314826108106e-4 | 64.387570721295 |
| rs4321976 | T | C | 0.0232959 | 0.00324034 | GCST007576_LD8 | 0.77856 | Chronotype | TRUE | PCOS | 3.1e-13 | 0.301826 | 1.1491380153097e-4 | 51.6863532654682 |
| rs4339281 | A | G | 0.0223188 | 0.00404047 | GCST007576_LD8 | 0.873018 | Chronotype | TRUE | PCOS | 3.2e-8 | 0.996359 | 6.7841075192292e-5 | 30.5123724205316 |
| rs4714475 | G | T | 0.0190271 | 0.00317856 | GCST007576_LD8 | 0.754058 | Chronotype | TRUE | PCOS | 1.6e-9 | 0.528561 | 7.96698593870535e-5 | 35.8329400071501 |
| rs4822107 | G | A | -0.015528 | 0.00270621 | GCST007576_LD8 | 0.494278 | Chronotype | TRUE | PCOS | 9.6e-9 | 0.615426 | 7.32015946411692e-5 | 32.9235096145673 |
| rs4838161 | T | G | 0.0161104 | 0.00270516 | GCST007576_LD8 | 0.560809 | Chronotype | TRUE | PCOS | 2.2e-9 | 0.222479 | 7.88563666875136e-5 | 35.4670283040982 |
| rs4936291 | A | G | -0.0179295 | 0.00283312 | GCST007576_LD8 | 0.610748 | Chronotype | TRUE | PCOS | 3.8e-10 | 0.702609 | 8.90455092461077e-5 | 40.0501812530556 |
| rs4948547 | C | A | 0.0190042 | 0.00307909 | GCST007576_LD8 | 0.255795 | Chronotype | TRUE | PCOS | 1.2e-9 | 0.618877 | 8.46958073031121e-5 | 38.0936411817362 |
| rs4949980 | A | G | -0.0321893 | 0.00539402 | GCST007576_LD8 | 0.932393 | Chronotype | TRUE | PCOS | 2.7e-9 | 0.569376 | 7.91786058106695e-5 | 35.6119724547731 |
| rs509476 | T | C | 0.1137 | 0.0078575 | GCST007576_LD8 | 0.0301569 | Chronotype | TRUE | PCOS | 5.6999999999999995e-47 | 0.5147 | 4.6536559864972e-4 | 209.387243031643 |
| rs521977 | T | G | 0.0159787 | 0.00286438 | GCST007576_LD8 | 0.322419 | Chronotype | TRUE | PCOS | 2.1e-8 | 0.0369386 | 6.91888081673698e-5 | 31.1185741317836 |
| rs56076457 | C | T | -0.0162984 | 0.00269462 | GCST007576_LD8 | 0.471265 | Chronotype | TRUE | PCOS | 1.3e-9 | 0.0143272 | 8.13399381996434e-5 | 36.5841488388077 |
| rs56947091 | C | T | -0.0191881 | 0.00268737 | GCST007576_LD8 | 0.488674 | Chronotype | TRUE | PCOS | 6e-13 | 0.513293 | 1.1334544379954e-4 | 50.9808515781046 |
| rs57435966 | C | T | 0.0549152 | 0.0047647 | GCST007576_LD8 | 0.912868 | Chronotype | TRUE | PCOS | 2.6000000000000002e-30 | 0.0569561 | 2.9527728486887e-4 | 132.834866997514 |
| rs59986227 | C | G | -0.0178401 | 0.00310217 | GCST007576_LD8 | 0.74221 | Chronotype | TRUE | PCOS | 8.3e-9 | 0.930505 | 7.35318892398875e-5 | 33.072075463823 |
| rs60616179 | A | G | 0.0375809 | 0.00594669 | GCST007576_LD8 | 0.945102 | Chronotype | TRUE | PCOS | 1.1e-10 | 0.950151 | 8.87951954902838e-5 | 39.9375871240924 |
| rs6131942 | A | G | -0.0175437 | 0.00273235 | GCST007576_LD8 | 0.419965 | Chronotype | TRUE | PCOS | 9.4e-11 | 0.789902 | 9.16588059231588e-5 | 41.2256768017431 |
| rs61773390 | G | T | -0.0340792 | 0.00337553 | GCST007576_LD8 | 0.803561 | Chronotype | TRUE | PCOS | 1.2e-23 | 0.0279049 | 2.2658997879245e-4 | 101.927860173965 |
| rs62082401 | C | G | -0.0256287 | 0.00342253 | GCST007576_LD8 | 0.80901 | Chronotype | TRUE | PCOS | 1.6e-14 | 0.758717 | 1.2466621121086e-4 | 56.0733749554922 |
| rs62182135 | C | A | 0.0179439 | 0.00284795 | GCST007576_LD8 | 0.66833 | Chronotype | TRUE | PCOS | 3.7e-10 | 0.184372 | 8.82622317989589e-5 | 39.697853852588 |
| rs62405438 | T | A | -0.0201979 | 0.00350204 | GCST007576_LD8 | 0.820386 | Chronotype | TRUE | PCOS | 6.3e-9 | 0.666363 | 7.39575283609242e-5 | 33.2635272330739 |
| rs62553781 | C | T | 0.0504004 | 0.00734656 | GCST007576_LD8 | 0.965171 | Chronotype | TRUE | PCOS | 1.2e-11 | 0.144447 | 1.0464024264734e-4 | 47.0649904983032 |
| rs6442446 | A | G | 0.0174738 | 0.00297308 | GCST007576_LD8 | 0.290534 | Chronotype | TRUE | PCOS | 3.1e-9 | 0.960652 | 7.68019864179282e-5 | 34.5429639239538 |
| rs6477309 | C | T | -0.0174399 | 0.00286276 | GCST007576_LD8 | 0.334608 | Chronotype | TRUE | PCOS | 8e-10 | 0.10399 | 8.25137911683819e-5 | 37.1121545943128 |
| rs6658041 | G | A | -0.0152482 | 0.00274124 | GCST007576_LD8 | 0.40008 | Chronotype | TRUE | PCOS | 1.7e-8 | 0.46696 | 6.87950892838348e-5 | 30.9414817157948 |
| rs6967481 | C | T | -0.0206433 | 0.00269925 | GCST007576_LD8 | 0.503437 | Chronotype | TRUE | PCOS | 6.9e-15 | 0.290148 | 1.300348704342e-4 | 58.4884478878587 |
| rs698015 | C | T | -0.0161876 | 0.0028566 | GCST007576_LD8 | 0.352507 | Chronotype | TRUE | PCOS | 8.8e-9 | 0.619184 | 7.1396896631731e-5 | 32.1117617961193 |
| rs7148842 | C | T | 0.0153777 | 0.00278312 | GCST007576_LD8 | 0.611932 | Chronotype | TRUE | PCOS | 1.8e-8 | 0.538823 | 6.78787290041143e-5 | 30.52930884 |
| rs72632979 | A | G | 0.021581 | 0.00357606 | GCST007576_LD8 | 0.82849 | Chronotype | TRUE | PCOS | 1.2e-9 | 0.538492 | 8.09734505459012e-5 | 36.4193008573661 |
| rs72720396 | A | G | -0.0271261 | 0.00318521 | GCST007576_LD8 | 0.769656 | Chronotype | TRUE | PCOS | 8.4e-18 | 0.490293 | 1.6124001242781e-4 | 72.5264874409219 |
| rs72829706 | A | G | 0.0407112 | 0.00693598 | GCST007576_LD8 | 0.960574 | Chronotype | TRUE | PCOS | 5.1e-9 | 0.226363 | 7.65990095081594e-5 | 34.4516647075161 |
| rs7304278 | A | G | -0.020255 | 0.00302264 | GCST007576_LD8 | 0.274848 | Chronotype | TRUE | PCOS | 2.2e-11 | 0.741855 | 9.98372389786141e-5 | 44.9044843000603 |
| rs7313852 | G | A | 0.029649 | 0.00271587 | GCST007576_LD8 | 0.564964 | Chronotype | TRUE | PCOS | 2.7000000000000002e-27 | 0.122269 | 2.6493012842809e-4 | 119.179130660616 |
| rs74357745 | A | G | 0.026546 | 0.00412156 | GCST007576_LD8 | 0.878807 | Chronotype | TRUE | PCOS | 8.7e-11 | 0.216218 | 9.22314737174446e-5 | 41.4832712011313 |
| rs75120545 | C | T | -0.0613917 | 0.00828587 | GCST007576_LD8 | 0.969821 | Chronotype | TRUE | PCOS | 1.1e-13 | 0.304592 | 1.2204903747696e-4 | 54.896057733598 |
| rs7547493 | A | G | -0.0376299 | 0.00350319 | GCST007576_LD8 | 0.821984 | Chronotype | TRUE | PCOS | 3.9000000000000004e-27 | 0.357946 | 2.5649069544085e-4 | 115.381667766213 |
| rs7602425 | C | T | -0.031168 | 0.00509212 | GCST007576_LD8 | 0.924418 | Chronotype | TRUE | PCOS | 8.5e-10 | 0.0657098 | 8.32968758016236e-5 | 37.464391214757804 |
| rs769066 | T | C | -0.0219436 | 0.00348289 | GCST007576_LD8 | 0.816519 | Chronotype | TRUE | PCOS | 3.2e-10 | 0.751384 | 8.82555828261827e-5 | 39.6948630688601 |
| rs7691121 | C | G | 0.0220069 | 0.00317772 | GCST007576_LD8 | 0.767817 | Chronotype | TRUE | PCOS | 5.6e-12 | 0.747701 | 1.0663123811314e-4 | 47.9605940766269 |
| rs7701529 | A | T | -0.0188448 | 0.00317247 | GCST007576_LD8 | 0.237864 | Chronotype | TRUE | PCOS | 3.6e-9 | 0.295882 | 7.84509530035886e-5 | 35.2846721123636 |
| rs7735794 | G | A | -0.0201147 | 0.00340433 | GCST007576_LD8 | 0.775911 | Chronotype | TRUE | PCOS | 4.7e-9 | 0.802146 | 7.76201330055654e-5 | 34.9109674507958 |
| rs77384811 | G | C | 0.0247483 | 0.00372778 | GCST007576_LD8 | 0.843254 | Chronotype | TRUE | PCOS | 2.8e-11 | 0.686875 | 9.79922917702605e-5 | 44.0745883323423 |
| rs786406 | A | G | -0.0235784 | 0.00293536 | GCST007576_LD8 | 0.297873 | Chronotype | TRUE | PCOS | 1.9e-16 | 0.531035 | 1.434458191069e-4 | 64.521430448025 |
| rs7959983 | T | C | -0.0195258 | 0.00272849 | GCST007576_LD8 | 0.595918 | Chronotype | TRUE | PCOS | 9.5e-13 | 0.245201 | 1.1385910549072e-4 | 51.2119141732928 |
| rs7977610 | A | T | 0.0160414 | 0.0028718 | GCST007576_LD8 | 0.673383 | Chronotype | TRUE | PCOS | 2.1e-8 | 0.913058 | 6.93729724586927e-5 | 31.2014101843622 |
| rs80097534 | G | T | 0.0281025 | 0.00455453 | GCST007576_LD8 | 0.901458 | Chronotype | TRUE | PCOS | 9.3e-10 | 0.978135 | 8.46467511743753e-5 | 38.0715753343183 |
| rs827749 | T | C | -0.0236615 | 0.00286775 | GCST007576_LD8 | 0.672364 | Chronotype | TRUE | PCOS | 1e-16 | 0.928013 | 1.5134933328231e-4 | 68.0769417554667 |
| rs885255 | T | C | 0.0169773 | 0.00283418 | GCST007576_LD8 | 0.348115 | Chronotype | TRUE | PCOS | 4.4e-9 | 0.71003 | 7.9779629873894e-5 | 35.8823151802702 |
| rs9348050 | T | C | 0.016638 | 0.00269048 | GCST007576_LD8 | 0.48949 | Chronotype | TRUE | PCOS | 7.5e-10 | 0.95395 | 8.5025668378749e-5 | 38.2420154442348 |
| rs9364767 | T | G | 0.0158538 | 0.00269933 | GCST007576_LD8 | 0.446852 | Chronotype | TRUE | PCOS | 5.4e-9 | 0.943606 | 7.66947712574888e-5 | 34.4947384332467 |
| rs9395520 | C | T | -0.0231272 | 0.00291912 | GCST007576_LD8 | 0.694567 | Chronotype | TRUE | PCOS | 2.1e-15 | 0.949888 | 1.3954872866062e-4 | 62.7682880728013 |
| rs9521184 | T | C | 0.0148855 | 0.00270389 | GCST007576_LD8 | 0.48682 | Chronotype | TRUE | PCOS | 3e-8 | 0.912134 | 6.73850922699426e-5 | 30.3072745752395 |
| rs9573971 | A | G | 0.0727759 | 0.00743443 | GCST007576_LD8 | 0.9661 | Chronotype | TRUE | PCOS | 3.6000000000000003e-22 | 0.8026 | 2.1302548825193e-4 | 95.8247920056205 |
| rs957501 | T | A | 0.0154211 | 0.00284661 | GCST007576_LD8 | 0.336064 | Chronotype | TRUE | PCOS | 3e-8 | 0.500021 | 6.52515307865969e-5 | 29.3476164206142 |
| rs9597250 | C | A | 0.0213068 | 0.00343801 | GCST007576_LD8 | 0.810212 | Chronotype | TRUE | PCOS | 6.9e-10 | 0.892974 | 8.53943973632756e-5 | 38.4078729321437 |
| rs9636202 | G | A | 0.0183734 | 0.00305534 | GCST007576_LD8 | 0.733565 | Chronotype | TRUE | PCOS | 7.5e-10 | 0.207701 | 8.04024582191129e-5 | 36.162465890951 |
| rs975025 | C | T | 0.0321062 | 0.00502525 | GCST007576_LD8 | 0.922916 | Chronotype | TRUE | PCOS | 1.3e-10 | 0.504586 | 9.07543251045695e-5 | 40.8188286231715 |
| rs9817740 | A | G | 0.0179438 | 0.00326142 | GCST007576_LD8 | 0.783824 | Chronotype | TRUE | PCOS | 2e-8 | 0.664872 | 6.73023809021778e-5 | 30.270071615788 |
| rs9831488 | A | G | -0.0183592 | 0.00284523 | GCST007576_LD8 | 0.649533 | Chronotype | TRUE | PCOS | 8.4e-11 | 0.463144 | 9.2571397638611e-5 | 41.6361741216386 |
| rs9932577 | C | A | 0.0166195 | 0.00271482 | GCST007576_LD8 | 0.495067 | Chronotype | TRUE | PCOS | 6.8e-10 | 0.436821 | 8.33224282799804e-5 | 37.4758848969437 |
| rs9964420 | C | A | 0.0284801 | 0.00293643 | GCST007576_LD8 | 0.695492 | Chronotype | TRUE | PCOS | 8.6e-22 | 0.0399374 | 2.0912076737789e-4 | 94.0679725209924 |
| rs10041724 | T | C | 0.0249 | 0.0044 | GCST90104339_LD8 | 0.8071 | Leisure screen time | TRUE | PCOS | 1.514e-8 | 0.828881 | 6.09398796531685e-5 | 32.0251880301683 |
| rs10059100 | A | G | -0.0215 | 0.0039 | GCST90104339_LD8 | 0.6074 | Leisure screen time | TRUE | PCOS | 4.683e-8 | 0.522391 | 6.4806280903895e-5 | 30.3910603856126 |
| rs1017550 | A | G | 0.0196 | 0.0035 | GCST90104339_LD8 | 0.5864 | Leisure screen time | TRUE | PCOS | 2.852e-8 | 0.900729 | 5.96739594486522e-5 | 31.3598806449587 |
| rs10189857 | A | G | -0.0274 | 0.0035 | GCST90104339_LD8 | 0.5653 | Leisure screen time | TRUE | PCOS | 7.798e-15 | 0.0455166 | 1.166135742969e-4 | 61.2862973578957 |
| rs10222987 | A | G | -0.0209 | 0.0036 | GCST90104339_LD8 | 0.6355 | Leisure screen time | TRUE | PCOS | 9.022e-9 | 0.616959 | 6.43327263332966e-5 | 33.7043466349114 |
| rs10253861 | A | G | -0.0198 | 0.0035 | GCST90104339_LD8 | 0.5514 | Leisure screen time | TRUE | PCOS | 1.481e-8 | 0.295235 | 6.08981660243288e-5 | 32.0031435023728 |
| rs10400776 | A | C | -0.0259 | 0.0044 | GCST90104339_LD8 | 0.2593 | Leisure screen time | TRUE | PCOS | 3.448e-9 | 0.374083 | 7.38855694695764e-5 | 34.6491290774462 |
| rs10765775 | A | G | -0.0223 | 0.0039 | GCST90104339_LD8 | 0.3915 | Leisure screen time | TRUE | PCOS | 9.798e-9 | 0.270231 | 6.79721796589467e-5 | 32.694801587491 |
| rs10772643 | T | C | -0.0385 | 0.0062 | GCST90104339_LD8 | 0.8923 | Leisure screen time | TRUE | PCOS | 5.882e-10 | 0.491155 | 8.22242475918437e-5 | 38.5599291904274 |
| rs10792966 | C | G | 0.0237 | 0.0041 | GCST90104339_LD8 | 0.6876 | Leisure screen time | TRUE | PCOS | 1.062e-8 | 0.439505 | 7.12517560486768e-5 | 33.4138967486774 |
| rs10889193 | A | C | 0.0243 | 0.0039 | GCST90104339_LD8 | 0.5547 | Leisure screen time | TRUE | PCOS | 4.942e-10 | 0.419343 | 8.26277857408244e-5 | 38.8223199378733 |
| rs11074658 | T | C | -0.0239 | 0.0039 | GCST90104339_LD8 | 0.5913 | Leisure screen time | TRUE | PCOS | 9.211e-10 | 0.726613 | 8.00809740182656e-5 | 37.5547379185846 |
| rs114590429 | A | C | 0.0376 | 0.006 | GCST90104339_LD8 | 0.1157 | Leisure screen time | TRUE | PCOS | 3.029e-10 | 0.532483 | 8.37402703586282e-5 | 39.2709436165444 |
| rs11587591 | A | G | 0.0219 | 0.0039 | GCST90104339_LD8 | 0.7344 | Leisure screen time | TRUE | PCOS | 2.23e-8 | 0.00656644 | 5.99026445449464e-5 | 31.5324245662321 |
| rs1188887 | T | C | 0.0258 | 0.0041 | GCST90104339_LD8 | 0.6673 | Leisure screen time | TRUE | PCOS | 2.473e-10 | 0.774043 | 8.4436955444809e-5 | 39.5976895294373 |
| rs11972285 | A | G | 0.0384 | 0.0056 | GCST90104339_LD8 | 0.8456 | Leisure screen time | TRUE | PCOS | 5.128e-12 | 0.0803193 | 1.062115991364e-4 | 47.0201957175028 |
| rs12062845 | A | C | 0.0281 | 0.0042 | GCST90104339_LD8 | 0.2158 | Leisure screen time | TRUE | PCOS | 2.409e-11 | 0.293115 | 8.50327058556589e-5 | 44.7623015754547 |
| rs12206846 | A | G | 0.0199 | 0.0036 | GCST90104339_LD8 | 0.4054 | Leisure screen time | TRUE | PCOS | 2.1e-8 | 0.537746 | 5.81448751958451e-5 | 30.5562108639814 |
| rs12214364 | T | G | -0.0197 | 0.0036 | GCST90104339_LD8 | 0.5869 | Leisure screen time | TRUE | PCOS | 4.866e-8 | 0.283638 | 5.69832660737516e-5 | 29.945102076356 |
| rs12324720 | A | G | -0.0271 | 0.0046 | GCST90104339_LD8 | 0.1756 | Leisure screen time | TRUE | PCOS | 3.526e-9 | 0.265563 | 6.60434541432086e-5 | 34.7073348230822 |
| rs12425850 | T | C | -0.0236 | 0.0039 | GCST90104339_LD8 | 0.286 | Leisure screen time | TRUE | PCOS | 1.367e-9 | 0.69065 | 7.00058714885716e-5 | 36.617874442623 |
| rs12463321 | A | G | -0.0317 | 0.0055 | GCST90104339_LD8 | 0.1478 | Leisure screen time | TRUE | PCOS | 6.99e-9 | 0.0370843 | 7.08369607090326e-5 | 33.2193624482735 |
| rs12617870 | T | G | 0.0263 | 0.0035 | GCST90104339_LD8 | 0.5377 | Leisure screen time | TRUE | PCOS | 6.622e-14 | 0.984494 | 1.0743937248509e-4 | 56.4642748940845 |
| rs12678836 | A | C | 0.0232 | 0.0035 | GCST90104339_LD8 | 0.424 | Leisure screen time | TRUE | PCOS | 5.366e-11 | 0.855504 | 8.3817645984309e-5 | 43.9377915343295 |
| rs12962050 | A | G | -0.0234 | 0.0036 | GCST90104339_LD8 | 0.647 | Leisure screen time | TRUE | PCOS | 1.178e-10 | 0.339542 | 8.03946855782875e-5 | 42.2498391977012 |
| rs13017586 | A | G | -0.0401 | 0.0054 | GCST90104339_LD8 | 0.8493 | Leisure screen time | TRUE | PCOS | 8.253e-14 | 0.271937 | 1.1758385531349e-4 | 55.144140661973 |
| rs13089152 | T | C | -0.0234 | 0.0041 | GCST90104339_LD8 | 0.6691 | Leisure screen time | TRUE | PCOS | 1.53e-8 | 0.0618486 | 6.94594553453184e-5 | 32.5733292451455 |
| rs13107325 | T | C | 0.0404 | 0.0067 | GCST90104339_LD8 | 0.0744 | Leisure screen time | TRUE | PCOS | 1.79e-9 | 0.241705 | 6.91860634441678e-5 | 36.3589616405757 |
| rs13188731 | A | T | 0.0218 | 0.004 | GCST90104339_LD8 | 0.3671 | Leisure screen time | TRUE | PCOS | 4.537e-8 | 0.525227 | 6.33378089172886e-5 | 29.7023733163583 |
| rs13235840 | A | T | -0.0313 | 0.005 | GCST90104339_LD8 | 0.8186 | Leisure screen time | TRUE | PCOS | 3.475e-10 | 0.838772 | 8.35622092227522e-5 | 39.1874328616151 |
| rs13301354 | T | C | -0.0211 | 0.0037 | GCST90104339_LD8 | 0.3769 | Leisure screen time | TRUE | PCOS | 1.218e-8 | 0.00235023 | 6.25474297696614e-5 | 32.5206930127283 |
| rs1362910 | A | G | 0.0253 | 0.0035 | GCST90104339_LD8 | 0.4188 | Leisure screen time | TRUE | PCOS | 1.027e-12 | 0.881316 | 9.96778391806597e-5 | 52.2520455224075 |
| rs1375561 | T | C | 0.0232 | 0.0037 | GCST90104339_LD8 | 0.6534 | Leisure screen time | TRUE | PCOS | 2.553e-10 | 0.290811 | 7.48125998512229e-5 | 39.3161396258408 |
| rs1391954 | T | G | 0.0245 | 0.004 | GCST90104339_LD8 | 0.4439 | Leisure screen time | TRUE | PCOS | 1.511e-9 | 0.862195 | 8.47436300479241e-5 | 37.5154554983757 |
| rs1445979 | A | T | 0.0196 | 0.0036 | GCST90104339_LD8 | 0.3862 | Leisure screen time | TRUE | PCOS | 3.737e-8 | 0.182829 | 5.64049685988066e-5 | 29.6418624923414 |
| rs16896229 | T | C | 0.03 | 0.0051 | GCST90104339_LD8 | 0.1357 | Leisure screen time | TRUE | PCOS | 3.799e-9 | 0.744377 | 6.6151321412336e-5 | 34.6019438131721 |
| rs17621391 | T | C | 0.0243 | 0.0041 | GCST90104339_LD8 | 0.7351 | Leisure screen time | TRUE | PCOS | 2.108e-9 | 0.522085 | 6.68429301759016e-5 | 35.1271714806939 |
| rs17801257 | A | G | -0.0292 | 0.0053 | GCST90104339_LD8 | 0.1247 | Leisure screen time | TRUE | PCOS | 2.917e-8 | 0.212548 | 5.7759962371265e-5 | 30.3537470579521 |
| rs1802669 | A | G | 0.0384 | 0.0041 | GCST90104339_LD8 | 0.3409 | Leisure screen time | TRUE | PCOS | 2.391e-21 | 0.831228 | 1.8702989959395e-4 | 87.7188406233505 |
| rs1860337 | T | C | -0.0253 | 0.0039 | GCST90104339_LD8 | 0.5953 | Leisure screen time | TRUE | PCOS | 9.083e-11 | 0.302963 | 8.97367617398046e-5 | 42.083318209252 |
| rs1947066 | A | G | 0.0298 | 0.0044 | GCST90104339_LD8 | 0.8028 | Leisure screen time | TRUE | PCOS | 8.543e-12 | 0.0100951 | 8.72818585024692e-5 | 45.8696601317892 |
| rs197439 | A | G | -0.0259 | 0.0039 | GCST90104339_LD8 | 0.6007 | Leisure screen time | TRUE | PCOS | 3.291e-11 | 0.97039 | 9.38659790950931e-5 | 44.1030338151785 |
| rs1999065 | T | C | 0.0249 | 0.0037 | GCST90104339_LD8 | 0.3377 | Leisure screen time | TRUE | PCOS | 1.239e-11 | 0.664867 | 8.59753542642615e-5 | 45.2890902697148 |
| rs249960 | A | G | 0.0298 | 0.005 | GCST90104339_LD8 | 0.8178 | Leisure screen time | TRUE | PCOS | 2.427e-9 | 0.937926 | 7.57455566288688e-5 | 35.5214484974111 |
| rs2529484 | C | G | 0.0221 | 0.0036 | GCST90104339_LD8 | 0.3515 | Leisure screen time | TRUE | PCOS | 1.394e-9 | 0.06871 | 7.17109701717265e-5 | 37.6858133578975 |
| rs262890 | A | G | -0.0344 | 0.0042 | GCST90104339_LD8 | 0.7003 | Leisure screen time | TRUE | PCOS | 2.057e-16 | 0.313194 | 1.4303875389031e-4 | 67.0836141083236 |
| rs2738284 | A | G | -0.0215 | 0.0037 | GCST90104339_LD8 | 0.3291 | Leisure screen time | TRUE | PCOS | 7.05e-9 | 0.775522 | 6.44807485077613e-5 | 33.7653933092227 |
| rs2783992 | T | C | -0.0242 | 0.0038 | GCST90104339_LD8 | 0.5385 | Leisure screen time | TRUE | PCOS | 3.364e-10 | 0.965569 | 8.64815605287785e-5 | 40.5566137255206 |
| rs28458909 | T | C | 0.0364 | 0.0059 | GCST90104339_LD8 | 0.1229 | Leisure screen time | TRUE | PCOS | 5.477e-10 | 0.359495 | 8.11635497105363e-5 | 38.0624633419997 |
| rs2964252 | A | G | -0.0235 | 0.0037 | GCST90104339_LD8 | 0.3158 | Leisure screen time | TRUE | PCOS | 3.16e-10 | 0.0321063 | 7.6759768530845e-5 | 40.3395104569905 |
| rs34864022 | A | G | -0.0483 | 0.0078 | GCST90104339_LD8 | 0.9341 | Leisure screen time | TRUE | PCOS | 4.712e-10 | 0.662964 | 8.17649327107977e-5 | 38.3445110129755 |
| rs36079846 | T | C | -0.0239 | 0.0038 | GCST90104339_LD8 | 0.5205 | Leisure screen time | TRUE | PCOS | 4.523e-10 | 0.918107 | 8.43508596638219e-5 | 39.5573105084261 |
| rs364789 | A | G | 0.0275 | 0.0044 | GCST90104339_LD8 | 0.7568 | Leisure screen time | TRUE | PCOS | 2.793e-10 | 0.65226 | 8.09536731272015e-5 | 39.0623380795457 |
| rs3759344 | A | G | 0.0452 | 0.0062 | GCST90104339_LD8 | 0.1063 | Leisure screen time | TRUE | PCOS | 4.255e-13 | 0.245125 | 1.1332919624225e-4 | 53.1485766457823 |
| rs3781412 | A | G | -0.0208 | 0.0036 | GCST90104339_LD8 | 0.6005 | Leisure screen time | TRUE | PCOS | 8.377e-9 | 0.797261 | 6.42711481848095e-5 | 33.3825874988243 |
| rs3791033 | T | C | 0.0331 | 0.0041 | GCST90104339_LD8 | 0.669 | Leisure screen time | TRUE | PCOS | 3.664e-16 | 0.836342 | 1.3870965671331e-4 | 65.1758082054961 |
| rs396321 | T | C | -0.0213 | 0.0035 | GCST90104339_LD8 | 0.5128 | Leisure screen time | TRUE | PCOS | 1.292e-9 | 0.353691 | 7.09595459517481e-5 | 37.0357764381838 |
| rs421151 | A | G | -0.036 | 0.0063 | GCST90104339_LD8 | 0.9161 | Leisure screen time | TRUE | PCOS | 1.093e-8 | 0.0503269 | 6.22913871178453e-5 | 32.6529366339546 |
| rs4303732 | T | C | 0.0265 | 0.0035 | GCST90104339_LD8 | 0.598 | Leisure screen time | TRUE | PCOS | 5.365e-14 | 0.528141 | 1.090819563144e-4 | 57.3263124245319 |
| rs4416502 | A | G | 0.0291 | 0.0048 | GCST90104339_LD8 | 0.1996 | Leisure screen time | TRUE | PCOS | 1.381e-9 | 0.719008 | 7.83730961362014e-5 | 36.7537494915221 |
| rs4460001 | A | C | -0.0193 | 0.0035 | GCST90104339_LD8 | 0.4324 | Leisure screen time | TRUE | PCOS | 4.452e-8 | 0.557282 | 5.78612907365374e-5 | 30.4072312094978 |
| rs4483592 | T | C | 0.036 | 0.0052 | GCST90104339_LD8 | 0.1633 | Leisure screen time | TRUE | PCOS | 3.971e-12 | 0.576606 | 1.022001342077e-4 | 47.92878966 |
| rs469565 | T | C | -0.0259 | 0.0046 | GCST90104339_LD8 | 0.7735 | Leisure screen time | TRUE | PCOS | 1.505e-8 | 0.988445 | 6.76008324876091e-5 | 31.7016606304045 |
| rs4889530 | A | T | -0.0253 | 0.0039 | GCST90104339_LD8 | 0.3812 | Leisure screen time | TRUE | PCOS | 1.32e-10 | 0.177558 | 8.97367617398046e-5 | 42.083318209252 |
| rs558134 | T | C | -0.0225 | 0.0036 | GCST90104339_LD8 | 0.3835 | Leisure screen time | TRUE | PCOS | 5.046e-10 | 0.0153377 | 7.43314127285587e-5 | 39.0623513261234 |
| rs56151256 | A | C | 0.0285 | 0.0044 | GCST90104339_LD8 | 0.7498 | Leisure screen time | TRUE | PCOS | 1.174e-10 | 0.300462 | 8.94629162961858e-5 | 41.9548830416298 |
| rs57092155 | T | C | -0.0268 | 0.0047 | GCST90104339_LD8 | 0.7826 | Leisure screen time | TRUE | PCOS | 8.8e-9 | 0.873534 | 6.93332086396144e-5 | 32.5141211700521 |
| rs58087899 | A | G | -0.0222 | 0.004 | GCST90104339_LD8 | 0.4556 | Leisure screen time | TRUE | PCOS | 4.347e-8 | 0.00780854 | 6.95804814263401e-5 | 30.8023608293536 |
| rs6010651 | A | C | 0.0235 | 0.004 | GCST90104339_LD8 | 0.6201 | Leisure screen time | TRUE | PCOS | 3.338e-9 | 0.518592 | 7.36005933360643e-5 | 34.5154777879784 |
| rs6073637 | A | C | -0.0225 | 0.0038 | GCST90104339_LD8 | 0.5235 | Leisure screen time | TRUE | PCOS | 4.592e-9 | 0.718094 | 7.47589018769233e-5 | 35.0587147369456 |
| rs6102913 | T | C | -0.0193 | 0.0035 | GCST90104339_LD8 | 0.4736 | Leisure screen time | TRUE | PCOS | 2.966e-8 | 0.164372 | 5.78615109426418e-5 | 30.4072312090573 |
| rs61166637 | C | G | 0.0242 | 0.0043 | GCST90104339_LD8 | 0.6711 | Leisure screen time | TRUE | PCOS | 1.483e-8 | 0.552489 | 7.15474944335978e-5 | 31.6731938336582 |
| rs61813324 | T | C | 0.031 | 0.0057 | GCST90104339_LD8 | 0.1361 | Leisure screen time | TRUE | PCOS | 4.365e-8 | 0.156045 | 6.29542424962609e-5 | 29.5782058779863 |
| rs62134209 | A | G | 0.0538 | 0.0091 | GCST90104339_LD8 | 0.953 | Leisure screen time | TRUE | PCOS | 3.284e-9 | 0.0441194 | 7.45327139460622e-5 | 34.952634403717 |
| rs62151809 | T | C | 0.0228 | 0.0039 | GCST90104339_LD8 | 0.4526 | Leisure screen time | TRUE | PCOS | 3.9e-9 | 0.741788 | 7.2879664822182e-5 | 34.1773690229461 |
| rs62244886 | C | G | 0.0239 | 0.0039 | GCST90104339_LD8 | 0.6038 | Leisure screen time | TRUE | PCOS | 1.235e-9 | 0.335111 | 8.00809740182656e-5 | 37.5547379185846 |
| rs6457816 | T | C | -0.0414 | 0.007 | GCST90104339_LD8 | 0.9343 | Leisure screen time | TRUE | PCOS | 3.972e-9 | 0.248814 | 6.65599353841882e-5 | 34.9786423814723 |
| rs6556840 | A | G | 0.0204 | 0.0037 | GCST90104339_LD8 | 0.3366 | Leisure screen time | TRUE | PCOS | 4.316e-8 | 0.647172 | 5.78471788735964e-5 | 30.3987155626454 |
| rs657412 | T | G | -0.033 | 0.0058 | GCST90104339_LD8 | 0.1047 | Leisure screen time | TRUE | PCOS | 1.395e-8 | 0.0888383 | 6.16001131351411e-5 | 32.3720527731592 |
| rs6674314 | A | G | 0.0274 | 0.0049 | GCST90104339_LD8 | 0.8134 | Leisure screen time | TRUE | PCOS | 2.299e-8 | 0.296836 | 6.65516350016373e-5 | 31.2685049553431 |
| rs6685030 | A | G | -0.0217 | 0.0035 | GCST90104339_LD8 | 0.48 | Leisure screen time | TRUE | PCOS | 5.273e-10 | 0.53635 | 7.30230065783015e-5 | 38.4398539433213 |
| rs6727997 | A | G | -0.0208 | 0.0037 | GCST90104339_LD8 | 0.3445 | Leisure screen time | TRUE | PCOS | 2.037e-8 | 0.840167 | 6.01358529019549e-5 | 31.6025093777448 |
| rs68049022 | T | C | 0.0314 | 0.0048 | GCST90104339_LD8 | 0.7981 | Leisure screen time | TRUE | PCOS | 6.183e-11 | 0.807796 | 9.12503899631635e-5 | 42.7932202603431 |
| rs6857 | T | C | -0.0369 | 0.0047 | GCST90104339_LD8 | 0.1689 | Leisure screen time | TRUE | PCOS | 5.8e-15 | 0.738792 | 1.1764606824798e-4 | 61.6389679395724 |
| rs71658797 | A | T | 0.0373 | 0.0058 | GCST90104339_LD8 | 0.1223 | Leisure screen time | TRUE | PCOS | 1.809e-10 | 0.230231 | 8.80242055714851e-5 | 41.3580284545214 |
| rs72671494 | T | C | -0.0349 | 0.0056 | GCST90104339_LD8 | 0.8595 | Leisure screen time | TRUE | PCOS | 5.716e-10 | 0.151458 | 8.28202179613731e-5 | 38.8394389376813 |
| rs73405293 | A | G | -0.0308 | 0.0054 | GCST90104339_LD8 | 0.147 | Leisure screen time | TRUE | PCOS | 1.346e-8 | 0.213801 | 6.93715380923105e-5 | 32.5320971869417 |
| rs73420302 | C | G | -0.03 | 0.0051 | GCST90104339_LD8 | 0.1785 | Leisure screen time | TRUE | PCOS | 3.038e-9 | 0.187958 | 7.37849267960557e-5 | 34.6019285438246 |
| rs7430216 | T | C | 0.025 | 0.0042 | GCST90104339_LD8 | 0.2227 | Leisure screen time | TRUE | PCOS | 2.5e-9 | 0.711548 | 6.77356207410416e-5 | 35.4307035218493 |
| rs743699 | A | G | -0.0267 | 0.0044 | GCST90104339_LD8 | 0.7433 | Leisure screen time | TRUE | PCOS | 1.177e-9 | 0.145654 | 7.85200570833512e-5 | 36.8226735260665 |
| rs74996610 | C | G | -0.0513 | 0.0093 | GCST90104339_LD8 | 0.9545 | Leisure screen time | TRUE | PCOS | 3.124e-8 | 0.926688 | 6.48840861810044e-5 | 30.4275497239275 |
| rs7615206 | T | C | -0.0345 | 0.0035 | GCST90104339_LD8 | 0.5703 | Leisure screen time | TRUE | PCOS | 1.503e-22 | 0.0865845 | 1.86139674661e-4 | 97.1628929574643 |
| rs7616518 | A | G | 0.0196 | 0.0035 | GCST90104339_LD8 | 0.4499 | Leisure screen time | TRUE | PCOS | 2.604e-8 | 0.146691 | 5.96744136589252e-5 | 31.3598806440502 |
| rs76267866 | A | T | -0.0297 | 0.0047 | GCST90104339_LD8 | 0.7923 | Leisure screen time | TRUE | PCOS | 3.529e-10 | 0.810789 | 8.51486448810216e-5 | 39.9314729657096 |
| rs7627290 | A | G | -0.0231 | 0.0039 | GCST90104339_LD8 | 0.5413 | Leisure screen time | TRUE | PCOS | 2.356e-9 | 0.421593 | 7.4810023988038e-5 | 35.0826906054445 |
| rs76602404 | T | C | -0.0266 | 0.0049 | GCST90104339_LD8 | 0.2194 | Leisure screen time | TRUE | PCOS | 4.38e-8 | 0.971492 | 6.65692837338693e-5 | 29.469254607671 |
| rs7821826 | T | C | 0.0207 | 0.0035 | GCST90104339_LD8 | 0.4925 | Leisure screen time | TRUE | PCOS | 3.254e-9 | 0.414771 | 6.67277951138351e-5 | 34.9786420457081 |
| rs78394231 | T | C | -0.0381 | 0.0065 | GCST90104339_LD8 | 0.9015 | Leisure screen time | TRUE | PCOS | 3.53e-9 | 0.609899 | 7.32637185730092e-5 | 34.3574865979216 |
| rs78451709 | T | C | -0.0277 | 0.0048 | GCST90104339_LD8 | 0.7954 | Leisure screen time | TRUE | PCOS | 9.655e-9 | 0.598117 | 7.10139647732178e-5 | 33.3023753230949 |
| rs7875078 | A | C | 0.0204 | 0.0035 | GCST90104339_LD8 | 0.4517 | Leisure screen time | TRUE | PCOS | 7.41e-9 | 0.748349 | 6.4493326488883e-5 | 33.9721159029869 |
| rs7969719 | T | C | 0.0271 | 0.0037 | GCST90104339_LD8 | 0.3131 | Leisure screen time | TRUE | PCOS | 4.462e-13 | 0.440667 | 1.0207663482202e-4 | 53.6455226337779 |
| rs7991062 | C | G | -0.0335 | 0.0041 | GCST90104339_LD8 | 0.6577 | Leisure screen time | TRUE | PCOS | 1.319e-16 | 0.706404 | 1.4235004653613e-4 | 66.7605718923307 |
| rs841020 | T | C | 0.0269 | 0.0044 | GCST90104339_LD8 | 0.1923 | Leisure screen time | TRUE | PCOS | 1.148e-9 | 0.0945453 | 7.11218485140167e-5 | 37.3764073329625 |
| rs892087 | T | C | -0.0284 | 0.004 | GCST90104339_LD8 | 0.6335 | Leisure screen time | TRUE | PCOS | 9.979e-13 | 0.82024 | 1.0748987348798e-4 | 50.4097849971424 |
| rs9278004 | A | G | 0.0394 | 0.0057 | GCST90104339_LD8 | 0.1487 | Leisure screen time | TRUE | PCOS | 3.233e-12 | 0.20929 | 1.0792636260672e-4 | 47.7794086238222 |
| rs9713906 | A | T | -0.0235 | 0.004 | GCST90104339_LD8 | 0.7409 | Leisure screen time | TRUE | PCOS | 3.86e-9 | 0.15519 | 6.56783048087609e-5 | 34.5154936347625 |
| rs9867121 | A | C | -0.0317 | 0.005 | GCST90104339_LD8 | 0.1829 | Leisure screen time | TRUE | PCOS | 2.023e-10 | 0.651378 | 8.57114474348583e-5 | 40.195428562411 |
| rs10188314 | T | C | -0.0197869 | 0.00303605 | ukb-b-5779_LD8 | 0.470852 | Alcohol intake frequency | TRUE | PCOS | 7.19946e-11 | 0.703116 | 9.18608960723913e-5 | 42.4752359469287 |
| rs10792669 | G | A | 0.0174322 | 0.00304065 | ukb-b-5779_LD8 | 0.505254 | Alcohol intake frequency | TRUE | PCOS | 9.90011e-9 | 0.675341 | 7.10842780865987e-5 | 32.8677258462345 |
| rs11039429 | T | C | -0.0235595 | 0.00303737 | ukb-b-5779_LD8 | 0.454624 | Alcohol intake frequency | TRUE | PCOS | 8.69961e-15 | 0.785887 | 1.3011073359311e-4 | 60.1637449613659 |
| rs11223617 | A | G | 0.0250908 | 0.00375381 | ukb-b-5779_LD8 | 0.206155 | Alcohol intake frequency | TRUE | PCOS | 2.29985e-11 | 0.486767 | 9.66218557555929e-5 | 44.676852037817 |
| rs11700855 | G | A | -0.029795 | 0.00523292 | ukb-b-5779_LD8 | 0.093465 | Alcohol intake frequency | TRUE | PCOS | 1.2e-8 | 0.309283 | 7.0113400867585e-5 | 32.418783201865 |
| rs11750777 | A | G | -0.020493 | 0.00372613 | ukb-b-5779_LD8 | 0.209454 | Alcohol intake frequency | TRUE | PCOS | 3.79997e-8 | 0.549631 | 6.5418345786185e-5 | 30.2477584224877 |
| rs11787216 | T | C | 0.0244162 | 0.00320078 | ukb-b-5779_LD8 | 0.369127 | Alcohol intake frequency | TRUE | PCOS | 2.39994e-14 | 0.607177 | 1.2584116720217e-4 | 58.189231209697 |
| rs11940694 | G | A | -0.0437138 | 0.00311609 | ukb-b-5779_LD8 | 0.604193 | Alcohol intake frequency | TRUE | PCOS | 1e-44 | 0.776086 | 4.254663474515e-4 | 196.795542826922 |
| rs12153855 | C | T | 0.0294435 | 0.00493484 | ukb-b-5779_LD8 | 0.10497 | Alcohol intake frequency | TRUE | PCOS | 2.39999e-9 | 0.860236 | 7.69896195274157e-5 | 35.5984293603157 |
| rs1228589 | A | G | 0.0210699 | 0.00352806 | ukb-b-5779_LD8 | 0.246133 | Alcohol intake frequency | TRUE | PCOS | 2.30001e-9 | 0.232829 | 7.71351660472141e-5 | 35.6657322931158 |
| rs1229984 | C | T | -0.261708 | 0.00918496 | ukb-b-5779_LD8 | 0.97277 | Alcohol intake frequency | TRUE | PCOS | 1.3995899999999998e-178 | 0.327961 | 0.00175287288397323 | 811.853336366798 |
| rs12312693 | C | T | -0.0176811 | 0.00305026 | ukb-b-5779_LD8 | 0.451772 | Alcohol intake frequency | TRUE | PCOS | 6.80002e-9 | 0.876257 | 7.26684967527739e-5 | 33.6002851448764 |
| rs13102973 | C | T | -0.0194072 | 0.00311875 | ukb-b-5779_LD8 | 0.61881 | Alcohol intake frequency | TRUE | PCOS | 4.90004e-10 | 0.230451 | 8.37454384491621e-5 | 38.7224438223751 |
| rs13135092 | G | A | 0.0438341 | 0.00549884 | ukb-b-5779_LD8 | 0.083483 | Alcohol intake frequency | TRUE | PCOS | 1.59993e-15 | 0.958316 | 1.3742167303096e-4 | 63.5448184310905 |
| rs13178443 | T | C | -0.0186516 | 0.00338983 | ukb-b-5779_LD8 | 0.276349 | Alcohol intake frequency | TRUE | PCOS | 3.79997e-8 | 0.624166 | 6.5475799023723e-5 | 30.2743250594474 |
| rs13390019 | C | T | 0.0296116 | 0.00449182 | ukb-b-5779_LD8 | 0.134041 | Alcohol intake frequency | TRUE | PCOS | 4.30031e-11 | 0.0360379 | 9.39877243332394e-5 | 43.4587450076729 |
| rs1421085 | C | T | 0.0199392 | 0.00308481 | ukb-b-5779_LD8 | 0.403447 | Alcohol intake frequency | TRUE | PCOS | 1e-10 | 0.145285 | 9.03550169846127e-5 | 41.7788749036853 |
| rs1515591 | G | T | 0.0182303 | 0.00311635 | ukb-b-5779_LD8 | 0.383186 | Alcohol intake frequency | TRUE | PCOS | 4.90004e-9 | 0.717233 | 7.40109411961646e-5 | 34.221047328321 |
| rs1666658 | C | T | 0.0179674 | 0.00309866 | ukb-b-5779_LD8 | 0.392206 | Alcohol intake frequency | TRUE | PCOS | 6.69993e-9 | 0.23099 | 7.27149877633524e-5 | 33.6217831100069 |
| rs17662759 | C | T | 0.0301348 | 0.00546031 | ukb-b-5779_LD8 | 0.089115 | Alcohol intake frequency | TRUE | PCOS | 3.40001e-8 | 0.773101 | 6.58728287569538e-5 | 30.4579134877245 |
| rs17690703 | T | C | 0.0250342 | 0.00343021 | ukb-b-5779_LD8 | 0.262687 | Alcohol intake frequency | TRUE | PCOS | 2.90001e-13 | 0.0168873 | 1.1518843675225e-4 | 53.2628178625106 |
| rs186347 | T | G | 0.0179489 | 0.00305071 | ukb-b-5779_LD8 | 0.463343 | Alcohol intake frequency | TRUE | PCOS | 4e-9 | 0.84314 | 7.48642030263681e-5 | 34.61560655 |
| rs1893659 | A | C | -0.029326 | 0.00305313 | ukb-b-5779_LD8 | 0.459939 | Alcohol intake frequency | TRUE | PCOS | 7.59976e-22 | 0.512316 | 1.9950845639398e-4 | 92.2599444021173 |
| rs1937522 | G | A | 0.0168979 | 0.00303207 | ukb-b-5779_LD8 | 0.528054 | Alcohol intake frequency | TRUE | PCOS | 2.5e-8 | 0.0856091 | 6.71723815592908e-5 | 31.0588338754886 |
| rs1991083 | T | C | -0.0223925 | 0.00325813 | ukb-b-5779_LD8 | 0.679886 | Alcohol intake frequency | TRUE | PCOS | 6.29941e-12 | 0.399793 | 1.0215435270651e-4 | 47.2352773369233 |
| rs2159935 | A | G | -0.0185742 | 0.00302582 | ukb-b-5779_LD8 | 0.490369 | Alcohol intake frequency | TRUE | PCOS | 8.30004e-10 | 0.73501 | 8.14951114167816e-5 | 37.681846679174 |
| rs2160935 | T | C | -0.018718 | 0.00309117 | ukb-b-5779_LD8 | 0.604293 | Alcohol intake frequency | TRUE | PCOS | 1.40001e-9 | 0.234672 | 7.92997029738701e-5 | 36.6666495261675 |
| rs2244598 | C | T | -0.018378 | 0.00311907 | ukb-b-5779_LD8 | 0.605114 | Alcohol intake frequency | TRUE | PCOS | 3.79997e-9 | 0.206766 | 7.50838505983772e-5 | 34.717174520201 |
| rs2411453 | G | T | -0.0350793 | 0.00309039 | ukb-b-5779_LD8 | 0.597353 | Alcohol intake frequency | TRUE | PCOS | 7.299620000000001e-30 | 0.342285 | 2.7860386676507e-4 | 128.846723370983 |
| rs2535911 | T | C | -0.0188476 | 0.00316849 | ukb-b-5779_LD8 | 0.354749 | Alcohol intake frequency | TRUE | PCOS | 2.69998e-9 | 0.602328 | 7.65256611236045e-5 | 35.3838880419573 |
| rs2622167 | A | G | -0.0191155 | 0.0030674 | ukb-b-5779_LD8 | 0.428653 | Alcohol intake frequency | TRUE | PCOS | 4.60002e-10 | 0.74541 | 8.39898712428991e-5 | 38.8354748164564 |
| rs262240 | T | C | -0.017207 | 0.00303483 | ukb-b-5779_LD8 | 0.468553 | Alcohol intake frequency | TRUE | PCOS | 1.40001e-8 | 0.712298 | 6.9525525500007e-5 | 32.1469445949914 |
| rs2717063 | A | C | -0.0203704 | 0.00308457 | ukb-b-5779_LD8 | 0.585731 | Alcohol intake frequency | TRUE | PCOS | 4.00037e-11 | 0.955379 | 9.43195639304668e-5 | 43.6121979493604 |
| rs28622224 | T | C | -0.0186203 | 0.00336834 | ukb-b-5779_LD8 | 0.280364 | Alcohol intake frequency | TRUE | PCOS | 3.2e-8 | 0.607012 | 6.60915129044912e-5 | 30.559034135113 |
| rs28768122 | C | T | 0.0207 | 0.00355204 | ukb-b-5779_LD8 | 0.759525 | Alcohol intake frequency | TRUE | PCOS | 5.60003e-9 | 0.562844 | 7.34490175395613e-5 | 33.9612069825982 |
| rs28787109 | A | G | 0.0178107 | 0.0030846100000000002 | ukb-b-5779_LD8 | 0.40423 | Alcohol intake frequency | TRUE | PCOS | 7.69999e-9 | 0.312544 | 7.21046100126453e-5 | 33.3395377460537 |
| rs2924321 | A | G | -0.0195131 | 0.00305022 | ukb-b-5779_LD8 | 0.539592 | Alcohol intake frequency | TRUE | PCOS | 1.6e-10 | 0.615443 | 8.85084360033635e-5 | 40.9249665403211 |
| rs2977454 | G | C | -0.0259222 | 0.00459853 | ukb-b-5779_LD8 | 0.124072 | Alcohol intake frequency | TRUE | PCOS | 1.7e-8 | 0.36995 | 6.87240450337112e-5 | 31.7763336752527 |
| rs34440851 | T | C | -0.0226831 | 0.00415058 | ukb-b-5779_LD8 | 0.157151 | Alcohol intake frequency | TRUE | PCOS | 4.60002e-8 | 0.267045 | 6.4593984999937e-5 | 29.8665706016243 |
| rs34473884 | A | G | -0.0203615 | 0.00350346 | ukb-b-5779_LD8 | 0.24819 | Alcohol intake frequency | TRUE | PCOS | 6.19998e-9 | 0.342604 | 7.30510359300659e-5 | 33.7771756137198 |
| rs34631026 | T | C | -0.0169128 | 0.00304832 | ukb-b-5779_LD8 | 0.446061 | Alcohol intake frequency | TRUE | PCOS | 2.90001e-8 | 0.592419 | 6.65754171691778e-5 | 30.782794053022 |
| rs34811474 | A | G | -0.0201809 | 0.00359305 | ukb-b-5779_LD8 | 0.230728 | Alcohol intake frequency | TRUE | PCOS | 1.89998e-8 | 0.070997 | 6.82272399597827e-5 | 31.5466073699167 |
| rs35105141 | T | C | 0.026345 | 0.00308788 | ukb-b-5779_LD8 | 0.401541 | Alcohol intake frequency | TRUE | PCOS | 1.39991e-17 | 0.903215 | 1.5741282137703e-4 | 72.7903316182112 |
| rs362307 | T | C | 0.0433047 | 0.00580219 | ukb-b-5779_LD8 | 0.074582 | Alcohol intake frequency | TRUE | PCOS | 8.4004e-14 | 0.964404 | 1.204666269607e-4 | 55.7037326162967 |
| rs4241258 | T | C | 0.0250636 | 0.00440325 | ukb-b-5779_LD8 | 0.13763 | Alcohol intake frequency | TRUE | PCOS | 1.29999e-8 | 0.834986 | 7.00717036609689e-5 | 32.3995020457331 |
| rs4242715 | A | G | -0.0186543 | 0.00324831 | ukb-b-5779_LD8 | 0.680585 | Alcohol intake frequency | TRUE | PCOS | 9.29994e-9 | 0.0300144 | 7.13255112694312e-5 | 32.9792744459651 |
| rs4417025 | A | G | -0.0188379 | 0.00316516 | ukb-b-5779_LD8 | 0.361153 | Alcohol intake frequency | TRUE | PCOS | 2.69998e-9 | 0.517348 | 7.66078476410561e-5 | 35.4218923046853 |
| rs4503294 | T | C | 0.0181476 | 0.00307049 | ukb-b-5779_LD8 | 0.565333 | Alcohol intake frequency | TRUE | PCOS | 3.40001e-9 | 0.43738 | 7.55480233366169e-5 | 34.9318143310691 |
| rs461599 | C | A | -0.0191888 | 0.00303977 | ukb-b-5779_LD8 | 0.462259 | Alcohol intake frequency | TRUE | PCOS | 2.69998e-10 | 0.432666 | 8.61806270126469e-5 | 39.848529986835 |
| rs4726481 | T | G | 0.0217614 | 0.00310188 | ukb-b-5779_LD8 | 0.400576 | Alcohol intake frequency | TRUE | PCOS | 2.29985e-12 | 0.155381 | 1.0644134275616e-4 | 49.2177549791845 |
| rs473098 | T | C | -0.0217406 | 0.00304345 | ukb-b-5779_LD8 | 0.557689 | Alcohol intake frequency | TRUE | PCOS | 9.09913e-13 | 0.505719 | 1.1035592986281e-4 | 51.0280332825555 |
| rs489062 | A | G | 0.0166498 | 0.00305291 | ukb-b-5779_LD8 | 0.437454 | Alcohol intake frequency | TRUE | PCOS | 4.90004e-8 | 0.372319 | 6.43272516338606e-5 | 29.7432321297833 |
| rs4916723 | C | A | 0.0239479 | 0.00309951 | ukb-b-5779_LD8 | 0.420617 | Alcohol intake frequency | TRUE | PCOS | 1.10002e-14 | 0.659901 | 1.2909981282691e-4 | 59.6962306338472 |
| rs4940926 | C | T | -0.0191003 | 0.00344068 | ukb-b-5779_LD8 | 0.735045 | Alcohol intake frequency | TRUE | PCOS | 2.80001e-8 | 0.232403 | 6.66493257194955e-5 | 30.816969780711 |
| rs4968391 | T | G | -0.0192695 | 0.0032265 | ukb-b-5779_LD8 | 0.674892 | Alcohol intake frequency | TRUE | PCOS | 2.30001e-9 | 0.785641 | 7.71395223836437e-5 | 35.6677467298906 |
| rs5022348 | T | C | 0.0202641 | 0.00357005 | ukb-b-5779_LD8 | 0.40703 | Alcohol intake frequency | TRUE | PCOS | 1.40001e-8 | 0.153583 | 6.96800855598134e-5 | 32.2184144599426 |
| rs550942 | T | C | 0.022401 | 0.00398884 | ukb-b-5779_LD8 | 0.823865 | Alcohol intake frequency | TRUE | PCOS | 2e-8 | 0.812383 | 6.82094976196602e-5 | 31.5384031861012 |
| rs56194430 | T | C | 0.0225403 | 0.00407148 | ukb-b-5779_LD8 | 0.16931 | Alcohol intake frequency | TRUE | PCOS | 3.09999e-8 | 0.880337 | 6.62855523156278e-5 | 30.6487589697327 |
| rs58905411 | A | G | -0.0266343 | 0.00307848 | ukb-b-5779_LD8 | 0.410052 | Alcohol intake frequency | TRUE | PCOS | 5.100350000000001e-18 | 0.439434 | 1.6187228260864e-4 | 74.8527952232356 |
| rs6030200 | A | G | -0.019529 | 0.00327075 | ukb-b-5779_LD8 | 0.31415 | Alcohol intake frequency | TRUE | PCOS | 2.39999e-9 | 0.666604 | 7.71018359930774e-5 | 35.6503199655065 |
| rs61873510 | T | G | 0.0203737 | 0.00330311 | ukb-b-5779_LD8 | 0.32785 | Alcohol intake frequency | TRUE | PCOS | 6.90001e-10 | 0.223604 | 8.22793591991305e-5 | 38.0444983265062 |
| rs62305780 | G | C | -0.0485216 | 0.00506585 | ukb-b-5779_LD8 | 0.102253 | Alcohol intake frequency | TRUE | PCOS | 9.899199999999999e-22 | 0.0496775 | 1.9838658556168e-4 | 91.7410477081438 |
| rs62339673 | A | C | 0.0182943 | 0.00315406 | ukb-b-5779_LD8 | 0.626705 | Alcohol intake frequency | TRUE | PCOS | 6.59994e-9 | 0.582343 | 7.27600496439746e-5 | 33.642620231312 |
| rs62466318 | T | C | -0.0254919 | 0.0037742 | ukb-b-5779_LD8 | 0.202827 | Alcohol intake frequency | TRUE | PCOS | 1.39991e-11 | 0.777064 | 9.86608010080961e-5 | 45.6197302604165 |
| rs650558 | T | C | 0.0207362 | 0.0035079 | ukb-b-5779_LD8 | 0.247918 | Alcohol intake frequency | TRUE | PCOS | 3.40001e-9 | 0.173244 | 7.55725384940431e-5 | 34.9431504800746 |
| rs6727281 | T | C | -0.024322 | 0.00391964 | ukb-b-5779_LD8 | 0.184023 | Alcohol intake frequency | TRUE | PCOS | 5.49997e-10 | 0.719114 | 8.32727553996507e-5 | 38.5038651454403 |
| rs71651683 | T | C | -0.0704589 | 0.0127906 | ukb-b-5779_LD8 | 0.0142 | Alcohol intake frequency | TRUE | PCOS | 3.59998e-8 | 0.53512 | 6.56287714804204e-5 | 30.3450602303669 |
| rs72769229 | T | A | -0.0231352 | 0.00419154 | ukb-b-5779_LD8 | 0.154942 | Alcohol intake frequency | TRUE | PCOS | 3.40001e-8 | 0.383284 | 6.58875814787935e-5 | 30.4647352189553 |
| rs72787062 | A | G | -0.0281947 | 0.00410324 | ukb-b-5779_LD8 | 0.162767 | Alcohol intake frequency | TRUE | PCOS | 6.4003e-12 | 0.583998 | 1.0211032617158e-4 | 47.2149177741274 |
| rs728538 | G | T | 0.0228752 | 0.00406259 | ukb-b-5779_LD8 | 0.168868 | Alcohol intake frequency | TRUE | PCOS | 1.79999e-8 | 0.87389 | 6.85688592800811e-5 | 31.7045746215056 |
| rs7298932 | G | A | -0.0237214 | 0.00431166 | ukb-b-5779_LD8 | 0.147849 | Alcohol intake frequency | TRUE | PCOS | 3.79997e-8 | 0.231409 | 6.54630271548088e-5 | 30.2684192892168 |
| rs7302200 | A | G | -0.0184222 | 0.00319841 | ukb-b-5779_LD8 | 0.339998 | Alcohol intake frequency | TRUE | PCOS | 8.40001e-9 | 0.0533273 | 7.17490988024336e-5 | 33.1751456235135 |
| rs73050128 | A | C | -0.0260048 | 0.00409088 | ukb-b-5779_LD8 | 0.164488 | Alcohol intake frequency | TRUE | PCOS | 2.1e-10 | 0.706614 | 8.73913595101569e-5 | 40.4084020665562 |
| rs7330939 | T | C | -0.0213301 | 0.0034046 | ukb-b-5779_LD8 | 0.720352 | Alcohol intake frequency | TRUE | PCOS | 3.69999e-10 | 0.142001 | 8.48886487369576e-5 | 39.2510893835792 |
| rs74679146 | C | T | -0.0320735 | 0.00575757 | ukb-b-5779_LD8 | 0.074515 | Alcohol intake frequency | TRUE | PCOS | 2.5e-8 | 0.871192 | 6.71147539667052e-5 | 31.0321865255461 |
| rs7514579 | C | A | 0.0196672 | 0.00359788 | ukb-b-5779_LD8 | 0.232457 | Alcohol intake frequency | TRUE | PCOS | 4.60002e-8 | 0.154345 | 6.46244036392376e-5 | 29.8806362944806 |
| rs76082653 | T | C | 0.0464269 | 0.00668673 | ukb-b-5779_LD8 | 0.054327 | Alcohol intake frequency | TRUE | PCOS | 3.80014e-12 | 0.466433 | 1.0425560496137e-4 | 48.2069792680495 |
| rs7610856 | A | C | -0.023864 | 0.00307022 | ukb-b-5779_LD8 | 0.429053 | Alcohol intake frequency | TRUE | PCOS | 7.70016e-15 | 0.37854 | 1.3065427879945e-4 | 60.415115370581 |
| rs780094 | C | T | -0.0509938 | 0.00310506 | ukb-b-5779_LD8 | 0.615206 | Alcohol intake frequency | TRUE | PCOS | 1.29987e-60 | 0.00738261 | 5.8300782503939e-4 | 269.707411391327 |
| rs780569 | A | T | 0.0198033 | 0.00336454 | ukb-b-5779_LD8 | 0.70882 | Alcohol intake frequency | TRUE | PCOS | 4e-9 | 0.760694 | 7.49245419120936e-5 | 34.6435080547762 |
| rs80292319 | C | T | -0.0393728 | 0.00649583 | ukb-b-5779_LD8 | 0.057704 | Alcohol intake frequency | TRUE | PCOS | 1.40001e-9 | 0.842359 | 7.94550833126908e-5 | 36.7385000997089 |
| rs8043563 | C | G | 0.0233654 | 0.00347125 | ukb-b-5779_LD8 | 0.737192 | Alcohol intake frequency | TRUE | PCOS | 1.69981e-11 | 0.738681 | 9.79862175379773e-5 | 45.3077792992972 |
| rs838145 | A | G | 0.0219548 | 0.00305549 | ukb-b-5779_LD8 | 0.542982 | Alcohol intake frequency | TRUE | PCOS | 6.70039e-13 | 0.360908 | 1.1165589011474e-4 | 51.6291955630001 |
| rs8614 | A | C | 0.0247806 | 0.00392537 | ukb-b-5779_LD8 | 0.182509 | Alcohol intake frequency | TRUE | PCOS | 2.69998e-10 | 0.24575 | 8.61902020490378e-5 | 39.8529577106377 |
| rs9349379 | G | A | -0.0193455 | 0.00308215 | ukb-b-5779_LD8 | 0.405493 | Alcohol intake frequency | TRUE | PCOS | 3.50002e-10 | 0.30681 | 8.52017013798398e-5 | 39.3958520163798 |
| rs9372625 | A | G | -0.0255579 | 0.00312467 | ukb-b-5779_LD8 | 0.381706 | Alcohol intake frequency | TRUE | PCOS | 2.90001e-16 | 0.411032 | 1.4468119064942e-4 | 66.9021598937698 |
| rs9403297 | A | G | 0.0188234 | 0.00313037 | ukb-b-5779_LD8 | 0.372967 | Alcohol intake frequency | TRUE | PCOS | 1.79999e-9 | 0.242707 | 7.81994554919437e-5 | 36.1578765762272 |
| rs9648478 | A | G | 0.0168603 | 0.00302891 | ukb-b-5779_LD8 | 0.510245 | Alcohol intake frequency | TRUE | PCOS | 2.59998e-8 | 0.726996 | 6.70133993149267e-5 | 30.9853195244507 |
| rs9814516 | T | G | -0.0251117 | 0.00355589 | ukb-b-5779_LD8 | 0.237423 | Alcohol intake frequency | TRUE | PCOS | 1.59993e-12 | 0.80672 | 1.0785533820641e-4 | 49.871647411104 |
| rs9829192 | T | G | 0.0169324 | 0.00305032 | ukb-b-5779_LD8 | 0.435133 | Alcohol intake frequency | TRUE | PCOS | 2.80001e-8 | 0.106387 | 6.664233206202e-5 | 30.8137358741008 |
| rs9906502 | A | G | 0.0237883 | 0.00396178 | ukb-b-5779_LD8 | 0.176998 | Alcohol intake frequency | TRUE | PCOS | 1.89998e-9 | 0.322119 | 7.79731597837376e-5 | 36.05323377 |
| rs9912298 | C | A | 0.0205894 | 0.00358993 | ukb-b-5779_LD8 | 0.239585 | Alcohol intake frequency | TRUE | PCOS | 9.69996e-9 | 0.998695 | 7.11405829180231e-5 | 32.8937617500357 |

PCOS:polycystic ovary syndrome

| **Table S3. Results of MR Analysis between lifestyle and PCOS** | | | | | | | | | | |
| --- | --- | --- | --- | --- | --- | --- | --- | --- | --- | --- |
| **id.exposure** | **outcome** | **exposure** | **method** | **nsnp** | **b** | **se** | **pval** | **or** | **or_lci95** | **or_uci95** |
| GCST006912_LD6 | PCOS | Overall physical activity time | MR Egger | 47 | -1.052610799 | 0.774340930351549 | 0.180804914441342 | 0.34902532362854 | 0.0765111327678157 | 1.59216929781557 |
| GCST006912_LD6 | PCOS | Overall physical activity time | Weighted median | 47 | -0.45140216 | 0.287831525968206 | 0.116814395630923 | 0.636734721424329 | 0.362202456666963 | 1.119349408 |
| GCST006912_LD6 | PCOS | Overall physical activity time | Inverse variance weighted | 47 | -0.528414384 | 0.205688842539279 | 0.0101992818661258 | 0.589539011420887 | 0.393936907625663 | 0.882263731220079 |
| GCST006912_LD6 | PCOS | Overall physical activity time | Simple mode | 47 | -0.227140784 | 0.673250452293776 | 0.737365649996842 | 0.796808596097278 | 0.21294706378512 | 2.98151065118786 |
| GCST006912_LD6 | PCOS | Overall physical activity time | Weighted mode | 47 | -0.513282117 | 0.699348764915067 | 0.466708108109553 | 0.59852791271386 | 0.151980098668424 | 2.35712218531439 |
| GCST006913_LD6 | PCOS | Sedentary behaviour duration | MR Egger | 37 | 0.116201232215974 | 0.53936445420764 | 0.830674047441397 | 1.12322187782018 | 0.390255706103787 | 3.23282239588413 |
| GCST006913_LD6 | PCOS | Sedentary behaviour duration | Weighted median | 37 | 0.270054232251279 | 0.300515553117403 | 0.368846332682155 | 1.31003549498093 | 0.726907349456076 | 2.36095150144529 |
| GCST006913_LD6 | PCOS | Sedentary behaviour duration | Inverse variance weighted | 37 | 0.05639285837262 | 0.203490118367781 | 0.781681638270543 | 1.05801325146582 | 0.71003020071846 | 1.57654144731391 |
| GCST006913_LD6 | PCOS | Sedentary behaviour duration | Simple mode | 37 | 0.234766575836016 | 0.657449121978949 | 0.723111427439772 | 1.26461354291879 | 0.348598759911213 | 4.58764515783403 |
| GCST006913_LD6 | PCOS | Sedentary behaviour duration | Weighted mode | 37 | 0.314166790188718 | 0.485876051958686 | 0.521993102991241 | 1.36911807296648 | 0.528268674409015 | 3.5483540640006 |
| GCST006914_LD8 | PCOS | Sleep duration | MR Egger | 13 | 0.140934127060358 | 0.843986607962259 | 0.870411008820145 | 1.15134880275651 | 0.220186662922482 | 6.02036493952193 |
| GCST006914_LD8 | PCOS | Sleep duration | Weighted median | 13 | -0.286243562 | 0.369788733388653 | 0.43888748325373 | 0.751079659422307 | 0.363844216664414 | 1.55044557247487 |
| GCST006914_LD8 | PCOS | Sleep duration | Inverse variance weighted | 13 | -0.23418506 | 0.271008667786586 | 0.387519844935556 | 0.791215379944181 | 0.465165487799135 | 1.34580443708786 |
| GCST006914_LD8 | PCOS | Sleep duration | Simple mode | 13 | -0.280371233 | 0.599196681220075 | 0.648231454045785 | 0.755503221698363 | 0.233447812448699 | 2.44502234572036 |
| GCST006914_LD8 | PCOS | Sleep duration | Weighted mode | 13 | -0.149750888 | 0.531051970048612 | 0.782756115877083 | 0.860922415417112 | 0.304034909659634 | 2.43783651751501 |
| GCST006915_LD6 | PCOS | Moderate intensity activity duration | MR Egger | 27 | 0.933787648616704 | 0.716025221685184 | 0.204070535020766 | 2.54412721116563 | 0.625238697669334 | 10.3521795607356 |
| GCST006915_LD6 | PCOS | Moderate intensity activity duration | Weighted median | 27 | 0.137833439719315 | 0.381032037000096 | 0.71754846939702 | 1.14778435906718 | 0.543900282693376 | 2.4221515907208 |
| GCST006915_LD6 | PCOS | Moderate intensity activity duration | Inverse variance weighted | 27 | -0.101329126 | 0.291539299843247 | 0.728166202444045 | 0.903635574282544 | 0.510305275283519 | 1.60013484213988 |
| GCST006915_LD6 | PCOS | Moderate intensity activity duration | Simple mode | 27 | 0.145193001424897 | 0.861849538803436 | 0.867519794768097 | 1.15626270908468 | 0.213518436880469 | 6.26148950860057 |
| GCST006915_LD6 | PCOS | Moderate intensity activity duration | Weighted mode | 27 | 0.145193001424897 | 0.741846654622649 | 0.84635221218015 | 1.15626270908468 | 0.270136891844857 | 4.94913317203514 |
| GCST007110_LD6 | PCOS | Walking duration | MR Egger | 23 | -0.976090099 | 0.881501830635973 | 0.280685419232251 | 0.376781400540335 | 0.066948361062428 | 2.12050334825609 |
| GCST007110_LD6 | PCOS | Walking duration | Weighted median | 23 | 0.0381559726076405 | 0.394747611783555 | 0.922997073423047 | 1.03889325913303 | 0.479242116674675 | 2.25209589541294 |
| GCST007110_LD6 | PCOS | Walking duration | Inverse variance weighted | 23 | -0.243069051 | 0.298640823867107 | 0.41569210242186 | 0.784217360699188 | 0.436745311042659 | 1.40813616831694 |
| GCST007110_LD6 | PCOS | Walking duration | Simple mode | 23 | -0.059973617 | 0.66345575305457 | 0.928790663391782 | 0.941789380495186 | 0.256571758573406 | 3.45699480778881 |
| GCST007110_LD6 | PCOS | Walking duration | Weighted mode | 23 | -0.1356108 | 0.612656467686629 | 0.826862421061086 | 0.873182408704743 | 0.26278541905595 | 2.90140724554084 |
| GCST007387_LD8 | PCOS | Insomnia | MR Egger | 37 | 0.916522169634281 | 1.93452968188636 | 0.638606018850599 | 2.50057866135978 | 0.0564073388853276 | 110.85248418401 |
| GCST007387_LD8 | PCOS | Insomnia | Weighted median | 37 | 0.503953200057886 | 0.862133271650471 | 0.558855643910861 | 1.65525189565143 | 0.305493122659411 | 8.96864326832091 |
| GCST007387_LD8 | PCOS | Insomnia | Inverse variance weighted | 37 | 0.466332837263578 | 0.627573657616578 | 0.45743768126017 | 1.59413749942157 | 0.465933885437777 | 5.45415228745241 |
| GCST007387_LD8 | PCOS | Insomnia | Simple mode | 37 | -0.175046704 | 1.62339733817945 | 0.914731338108984 | 0.839417815330204 | 0.0348429141305684 | 20.2228282644003 |
| GCST007387_LD8 | PCOS | Insomnia | Weighted mode | 37 | 0.375690320018618 | 1.1515018554165 | 0.746115938985855 | 1.45599617108048 | 0.152398981839097 | 13.9103609789154 |
| GCST007561_LD8 | PCOS | Sleep duration | MR Egger | 61 | 1.71633380755923 | 1.17499082492295 | 0.149397201413943 | 5.56409199314353 | 0.556188391054973 | 55.6630095235196 |
| GCST007561_LD8 | PCOS | Sleep duration | Weighted median | 61 | -0.318982072 | 0.442955870868677 | 0.471450155612795 | 0.726888581134223 | 0.30508172772701 | 1.7318867744715 |
| GCST007561_LD8 | PCOS | Sleep duration | Inverse variance weighted | 61 | -0.414269504 | 0.310983626174679 | 0.182818650598119 | 0.660822832863599 | 0.359228209530642 | 1.21562506743119 |
| GCST007561_LD8 | PCOS | Sleep duration | Simple mode | 61 | -1.216057517 | 1.09905193826831 | 0.272943837705781 | 0.296396404155574 | 0.0343827836088965 | 2.55508190947121 |
| GCST007561_LD8 | PCOS | Sleep duration | Weighted mode | 61 | 8.0507037785437e-4 | 0.776409339278338 | 0.999176101708495 | 1.00080539453399 | 0.218502628535589 | 4.58397889508778 |
| GCST007576_LD8 | PCOS | Chronotype | MR Egger | 142 | -0.103568421 | 0.441708410983306 | 0.814960839310204 | 0.901614331257918 | 0.379342075707602 | 2.14294288555603 |
| GCST007576_LD8 | PCOS | Chronotype | Weighted median | 142 | -0.175707963 | 0.21113218463568 | 0.405286015572047 | 0.838862926352773 | 0.554589518514973 | 1.26885017786383 |
| GCST007576_LD8 | PCOS | Chronotype | Inverse variance weighted | 142 | -0.40381281 | 0.141956294793267 | 0.00444633571325973 | 0.667769109103182 | 0.505580933225441 | 0.881986550061653 |
| GCST007576_LD8 | PCOS | Chronotype | Simple mode | 142 | 0.219781486720094 | 0.536376925039222 | 0.682609769017105 | 1.24580447602067 | 0.435388176361908 | 3.56470128665836 |
| GCST007576_LD8 | PCOS | Chronotype | Weighted mode | 142 | 0.124483305427344 | 0.537992310951377 | 0.817351224451558 | 1.13256311264525 | 0.394560960742461 | 3.25095316503432 |
| GCST90104339_LD8 | PCOS | Leisure screen time | MR Egger | 107 | -0.088160213 | 0.647603450031919 | 0.891976785276849 | 0.915614171863026 | 0.257312758493997 | 3.25809461071078 |
| GCST90104339_LD8 | PCOS | Leisure screen time | Weighted median | 107 | 0.39675392911963 | 0.186525513974693 | 0.033413775721199 | 1.48698998009484 | 1.03165460063293 | 2.14329408267639 |
| GCST90104339_LD8 | PCOS | Leisure screen time | Inverse variance weighted | 107 | 0.319671148199583 | 0.138031760165521 | 0.0205623861954493 | 1.3766749678468 | 1.05035573105674 | 1.80437342422005 |
| GCST90104339_LD8 | PCOS | Leisure screen time | Simple mode | 107 | 0.495751200442935 | 0.47402787444689 | 0.298019884518935 | 1.64173104504509 | 0.648337792666203 | 4.15721689334329 |
| GCST90104339_LD8 | PCOS | Leisure screen time | Weighted mode | 107 | 0.367150238020438 | 0.448529383185575 | 0.414871351070159 | 1.44361478865187 | 0.599315353360543 | 3.47734067937459 |
| GCST90104341_LD8 | PCOS | Moderate-to-vigorous intensity physical activity | MR Egger | 10 | -1.918359009 | 2.12893154225805 | 0.393858267972162 | 0.146847740283988 | 0.00226299791833362 | 9.52906701849409 |
| GCST90104341_LD8 | PCOS | Moderate-to-vigorous intensity physical activity | Weighted median | 10 | -0.376494979 | 0.581400531644094 | 0.517265958271163 | 0.686262563353803 | 0.219579698534925 | 2.1448080537647 |
| GCST90104341_LD8 | PCOS | Moderate-to-vigorous intensity physical activity | Inverse variance weighted | 10 | -0.246003819 | 0.423586712560156 | 0.561399671941087 | 0.781919239007166 | 0.340876930210675 | 1.79360244752169 |
| GCST90104341_LD8 | PCOS | Moderate-to-vigorous intensity physical activity | Simple mode | 10 | 0.77177568325235 | 0.930926938866303 | 0.428520604022401 | 2.16360472149359 | 0.348944946051856 | 13.415254881421 |
| GCST90104341_LD8 | PCOS | Moderate-to-vigorous intensity physical activity | Weighted mode | 10 | 0.654460700630002 | 0.778629706959982 | 0.422379722520314 | 1.92410456913716 | 0.418259374803912 | 8.85139369490557 |
| GCST90104345_LD8 | PCOS | Sedentary behavior at work | MR Egger | 9 | 0.00205882457863516 | 1.09591784047727 | 0.998553487680506 | 1.00206094541318 | 0.116958028097205 | 8.58535454691336 |
| GCST90104345_LD8 | PCOS | Sedentary behavior at work | Weighted median | 9 | -0.053589313 | 0.41915753664281 | 0.898267639168737 | 0.947821284543305 | 0.41680446137184 | 2.15536365536133 |
| GCST90104345_LD8 | PCOS | Sedentary behavior at work | Inverse variance weighted | 9 | -0.044554072 | 0.316736744653922 | 0.888133853452621 | 0.9564238830248 | 0.514089403728981 | 1.77935323580891 |
| GCST90104345_LD8 | PCOS | Sedentary behavior at work | Simple mode | 9 | 0.214951214038823 | 0.700079991273182 | 0.766654609603237 | 1.23980141058715 | 0.314363421552956 | 4.88958775833576 |
| GCST90104345_LD8 | PCOS | Sedentary behavior at work | Weighted mode | 9 | -0.361168536 | 0.60581238635128 | 0.567541471330682 | 0.696861542356107 | 0.212553658227716 | 2.28467490639316 |
| ieu-b-4877_LD8 | PCOS | Smoking initiation | MR Egger | 85 | 0.787896214450121 | 0.787117037357223 | 0.319741066573836 | 2.1987658252973 | 0.470079627333222 | 10.2845791933635 |
| ieu-b-4877_LD8 | PCOS | Smoking initiation | Weighted median | 85 | 0.0971287871778837 | 0.21563834118099 | 0.652404398572706 | 1.10200228824715 | 0.722150031701017 | 1.68165753651138 |
| ieu-b-4877_LD8 | PCOS | Smoking initiation | Inverse variance weighted | 85 | 0.0633702995914878 | 0.155436236508323 | 0.683498916539415 | 1.065421291 | 0.785617910294933 | 1.44487862738565 |
| ieu-b-4877_LD8 | PCOS | Smoking initiation | Simple mode | 85 | -0.262946844 | 0.552994608233832 | 0.635667527860747 | 0.76878276147864 | 0.260066925232225 | 2.27259553985564 |
| ieu-b-4877_LD8 | PCOS | Smoking initiation | Weighted mode | 85 | -0.003918162 | 0.522948048536212 | 0.994039711612466 | 0.996089504029432 | 0.357401193422845 | 2.77613594553314 |
| ukb-b-5237_LD8 | PCOS | Coffee intake | MR Egger | 36 | 0.959142261119749 | 0.788859722837084 | 0.2324133117738 | 2.60945728027324 | 0.555980089490893 | 12.2473222086176 |
| ukb-b-5237_LD8 | PCOS | Coffee intake | Weighted median | 36 | 0.196373096424643 | 0.556958507827025 | 0.724402437314568 | 1.21698087185456 | 0.408499095486312 | 3.62557092249302 |
| ukb-b-5237_LD8 | PCOS | Coffee intake | Inverse variance weighted | 36 | 0.588241611119649 | 0.394880602072581 | 0.136311143261232 | 1.80081908949826 | 0.830502475712711 | 3.90480400473021 |
| ukb-b-5237_LD8 | PCOS | Coffee intake | Simple mode | 36 | -0.538287421 | 1.16894614933943 | 0.648013317793057 | 0.583747109738616 | 0.0590469804034027 | 5.77100955544461 |
| ukb-b-5237_LD8 | PCOS | Coffee intake | Weighted mode | 36 | 0.371763118094062 | 0.597701382353344 | 0.537980720916186 | 1.45028939328423 | 0.449449584099045 | 4.67981148205765 |
| ukb-b-5779_LD8 | PCOS | Alcohol intake frequency | MR Egger | 92 | -0.40787611 | 0.482487165217804 | 0.400150828272811 | 0.665061267959407 | 0.25832134285542 | 1.71223362828107 |
| ukb-b-5779_LD8 | PCOS | Alcohol intake frequency | Weighted median | 92 | 0.425367374613957 | 0.238728683076091 | 0.0747814374175462 | 1.53015245558586 | 0.958351321613952 | 2.4431192241613 |
| ukb-b-5779_LD8 | PCOS | Alcohol intake frequency | Inverse variance weighted | 92 | 0.375899233137909 | 0.155688534729003 | 0.0157598052793518 | 1.45630037955772 | 1.07331254755539 | 1.9759489445366 |
| ukb-b-5779_LD8 | PCOS | Alcohol intake frequency | Simple mode | 92 | 0.577783660758164 | 0.645299175205317 | 0.372949856385641 | 1.78208434710254 | 0.50308168691002 | 6.31274145495961 |
| ukb-b-5779_LD8 | PCOS | Alcohol intake frequency | Weighted mode | 92 | 0.510942271287735 | 0.646635367398577 | 0.431491418429066 | 1.66686109054222 | 0.469323469044746 | 5.92006596392624 |

PCOS:polycystic ovary syndrome

| **Table S4. Results of sensitivity analysis between lifestyle and PCOS** | | | | | | | | | | | |
| --- | --- | --- | --- | --- | --- | --- | --- | --- | --- | --- | --- |
| **Expourse** | **Outcome** | **Heterogeneity test** | | | | **Pleiotropy test** | | | | **Causal direction** | |
| **IVW Q** | **IVW Q_pval** | **MR Egger Q** | **MR Egger Q_pval** | **MR Egger_intercept** | **MR Egger_pval** | **RSSobs** | **Global pval** | **Correct_direction** | **Steiger_pval** |
| Overall physical activity time | PCOS | 47.018416508816 | 0.430597586163576 | 46.5083952639618 | 0.410052730112885 | 0.0146212810087289 | 0.485997253105037 | 49.0294240817084 | 0.435 | TRUE | 3.60820905578089e-142 |
| Sedentary behaviour duration | PCOS | 36.8435287151558 | 0.429690115112514 | 36.8283724770633 | 0.384268840710538 | -0.001987623 | 0.905156915632007 | 38.9624452136199 | 0.417 | TRUE | 2.15504000019112e-117 |
| Moderate intensity activity duration | PCOS | 31.7257461981452 | 0.202345442881474 | 28.8639505995305 | 0.269643257713807 | -0.038748279 | 0.127969588482984 | 34.2254874117639 | 0.217 | TRUE | 1.1948966646696799e-80 |
| Walking duration | PCOS | 25.8239816382419 | 0.259316067417647 | 24.8966841172723 | 0.251666516865422 | 0.0221566879050661 | 0.386494624110616 | 28.2007432026107 | 0.272 | TRUE | 3.2191598744149e-68 |
| Insomnia | PCOS | 47.3442616046863 | 0.0977397217942916 | 47.2622736656882 | 0.0806984882336731 | -0.004882401 | 0.806807239403141 | 49.7880083996383 | 0.109 | TRUE | 2.42525752835432e-79 |
| Sleep duration | PCOS | 76.1468102239363 | 0.0779573636744326 | 71.8538634035175 | 0.121556446576402 | -0.036787146 | 0.065396362998293 | 78.7229672223122 | 0.072 | TRUE | 1.27933325130577e-126 |
| Chronotype | PCOS | 149.960962307148 | 0.286982513818993 | 149.410850785534 | 0.27762462000691 | -0.006932219 | 0.47398027958999 | 152.151204108021 | 0.268 | TRUE | 0 |
| Leisure screen time | PCOS | 125.251138234351 | 0.0976908659030253 | 124.757366178782 | 0.0915075280004497 | 0.011182233789443 | 0.520559167704086 | 127.487025071217 | 0.102 | TRUE | 1.1551032812792899e-193 |
| Moderate-to-vigorous intensity physical activity | PCOS | 7.14451397398351 | 0.622076346742983 | 6.50200976146142 | 0.591184728837992 | 0.0424667853128344 | 0.445958582184218 | 8.73216642546632 | 0.624 | TRUE | 1.1065857260412099e-20 |
| Sedentary behavior at work | PCOS | 7.47564286167916 | 0.486287733745462 | 7.47352229957925 | 0.381293750291664 | -0.001694212 | 0.965697271487562 | 9.75903202044739 | 0.49 | TRUE | 5.36993954163492e-28 |
| Smoking initiation | PCOS | 98.6202037203612 | 0.131522657893157 | 97.5835643455172 | 0.130776585310158 | -0.019185969 | 0.35045649205779 | 101.106347709736 | 0.12 | TRUE | 1.1644853335528197e-133 |
| Coffee intake | PCOS | 40.434488223933 | 0.242748783485942 | 40.084327218427 | 0.218363551261529 | -0.007168904 | 0.589319867957011 | 43.6518436041974 | 0.265 | TRUE | 2.7747209074911894e-165 |
| Alcohol intake frequency | PCOS | 82.5091406324987 | 0.725834182379139 | 79.5636157028122 | 0.776357695073934 | 0.0196265442870219 | 0.0895559590934521 | 84.9438251710074 | 0.725 | TRUE | 4.36474195531689e-276 |

PCOS:polycystic ovary syndrome

| **Table S5. Results of inverse MR Analysis between lifestyle and PCOS** | | | | | | | | | |
| --- | --- | --- | --- | --- | --- | --- | --- | --- | --- |
| **outcome** | **exposure** | **method** | **nsnp** | **b** | **se** | **pval** | **or** | **or_lci95** | **or_uci95** |
| Overall physical activity time | PCOS | MR Egger | 26 | -0.020773827 | 0.0130316148119209 | 0.123997425066595 | 0.979440462674739 | 0.954740415327729 | 1.00477952386169 |
| Overall physical activity time | PCOS | Weighted median | 26 | -0.015086664 | 0.00783513599672808 | 0.0541650827617267 | 0.985026569295851 | 0.970015206481043 | 1.00027023879209 |
| Overall physical activity time | PCOS | Inverse variance weighted | 26 | -0.00839685 | 0.00571239428482736 | 0.141579260527426 | 0.991638304708502 | 0.980597554968421 | 1.00280336452279 |
| Overall physical activity time | PCOS | Simple mode | 26 | -0.022441653 | 0.0151378196217753 | 0.150707206860122 | 0.97780828738374 | 0.949222756990721 | 1.00725466160065 |
| Overall physical activity time | PCOS | Weighted mode | 26 | -0.021910005 | 0.0112665492588341 | 0.0631435909883628 | 0.978328275658761 | 0.956961190509471 | 1.00017244632866 |
| Chronotype | PCOS | MR Egger | 22 | -0.014444287 | 0.0146880539360715 | 0.33715658367784 | 0.98565953137806 | 0.957688344735116 | 1.01444767197739 |
| Chronotype | PCOS | Weighted median | 22 | -0.007802702 | 0.00603047162943607 | 0.195707120253134 | 0.992227659731991 | 0.98056884000959 | 1.00402510111131 |
| Chronotype | PCOS | Inverse variance weighted | 22 | -0.010898058 | 0.00460373587616367 | 0.0179222457600913 | 0.989161110219972 | 0.980275738771402 | 0.998127020054485 |
| Chronotype | PCOS | Simple mode | 22 | -0.009785939 | 0.0118334014104842 | 0.417548824039238 | 0.99026178726061 | 0.967558485285679 | 1.01349781147239 |
| Chronotype | PCOS | Weighted mode | 22 | -0.017973723 | 0.00950096887917993 | 0.0723923286175537 | 0.982186841311491 | 0.96406590393763 | 1.00064838649024 |
| Leisure screen time | PCOS | MR Egger | 27 | -0.003271016 | 0.0111675268085834 | 0.772012804351157 | 0.996734328103977 | 0.975154490847852 | 1.0187917198198 |
| Leisure screen time | PCOS | Weighted median | 27 | -0.001622378 | 0.00626299704629843 | 0.795603045962325 | 0.998378937775801 | 0.986198277518495 | 1.01071004291593 |
| Leisure screen time | PCOS | Inverse variance weighted | 27 | -0.001385391 | 0.00469237489890531 | 0.767808214555581 | 0.998615568114584 | 0.989473351185436 | 1.00784225435286 |
| Leisure screen time | PCOS | Simple mode | 27 | -0.001501515 | 0.010840886226833 | 0.890908671796852 | 0.998499612096953 | 0.977507170483322 | 1.01994287659783 |
| Leisure screen time | PCOS | Weighted mode | 27 | -0.001984392 | 0.00877811654297748 | 0.822921483433787 | 0.998017575419403 | 0.980993445772037 | 1.01533714128145 |
| Alcohol intake frequency | PCOS | MR Egger | 22 | -0.01495976 | 0.0101199771244979 | 0.154920288817979 | 0.985151581665981 | 0.965803467947749 | 1.00488729960896 |
| Alcohol intake frequency | PCOS | Weighted median | 22 | -0.007964405 | 0.00549045754603735 | 0.146893972512104 | 0.992067227272469 | 0.981448535326756 | 1.00280080717672 |
| Alcohol intake frequency | PCOS | Inverse variance weighted | 22 | -0.012748415 | 0.00407387268391822 | 0.00175216716727985 | 0.987332501986393 | 0.979480249856706 | 0.995247703689099 |
| Alcohol intake frequency | PCOS | Simple mode | 22 | -0.009734873 | 0.00918873925298036 | 0.301435826701992 | 0.990312357240013 | 0.97263654985019 | 1.00830938859261 |
| Alcohol intake frequency | PCOS | Weighted mode | 22 | -0.00752583 | 0.00772020866360517 | 0.340744819979863 | 0.99250241863195 | 0.977597313626487 | 1.00763477687566 |

PCOS:polycystic ovary syndrome

**Table S6.The statistical power results of the Mendelian randomization outcome**

| outcome | exposure | method | nsnp | b | se | pval | or | R2 | Power |
| --- | --- | --- | --- | --- | --- | --- | --- | --- | --- |
| PCOS | Overall physical activity time | IVW | 47 | -0.528414384 | 0.205688842539279 | 0.0101992818661258 | 0.589539011 | 0.0123 | 78.40% |
| PCOS | Chronotype | IVW | 142 | -0.40381281 | 0.141956294793267 | 0.00444633571325973 | 0.667769109 | 0.0151 | 64.30% |
| PCOS | Leisure screen time | IVW | 107 | 0.319671148199583 | 0.138031760165521 | 0.0205623861954493 | 1.376674968 | 0.0086 | 28.50% |
| PCOS | Alcohol intake frequency | IVW | 92 | 0.375899233137909 | 0.155688534729003 | 0.0157598052793518 | 1.45630038 | 0.0108 | 98.50% |
| PCOS | PC (15:0_18:1) levels | IVW | 8 | -0.308915155 | 0.123835452951193 | 0.0126112863881904 | 0.734243064 | 0.0298 | 70.80% |
| PCOS | CE (27:1/16:1) levels | IVW | 15 | -0.264806012 | 0.094626809350486 | 0.00513525223462243 | 0.767354793 | 0.0522 | 80.80% |
| PCOS | CE (27:1/20:2) levels | IVW | 19 | -0.148360696 | 0.0674490085611345 | 0.0278354383077308 | 0.862120096 | 0.1019 | 60.30% |
| PCOS | PC (18:0_22:5) levels | IVW | 18 | 0.151421048847951 | 0.0744546721303913 | 0.0419783534839685 | 1.16348644 | 0.099 | 60.70% |
| PCOS | PI (18:1_18:1) levels | IVW | 16 | 0.159739413558152 | 0.0745270033320571 | 0.0320828935969002 | 1.17320511 | 0.081 | 56.80% |
| PCOS | PI (18:0_18:1) levels | IVW | 16 | 0.16076250208222 | 0.0667362285760265 | 0.0159996297764484 | 1.174406017 | 0.1042 | 68.10% |
| PCOS | DAG (18:1_18:1) levels | IVW | 19 | 0.162222884221977 | 0.0738747976681461 | 0.0280979233268376 | 1.176122351 | 0.0849 | 60.10% |
| PCOS | PI (18:0_18:2) levels | IVW | 23 | 0.168717211306558 | 0.0595244234076074 | 0.00459089627451552 | 1.18378533 | 0.207 | 94.90% |
| PCOS | DAG (18:1_18:2) levels | IVW | 24 | 0.177840305530768 | 0.068322289159578 | 0.00924222637125237 | 1.194634529 | 0.1122 | 79.60% |
| PCOS | TAG (50:4) levels | IVW | 19 | 0.200924068159956 | 0.0758553922463423 | 0.00807834598533206 | 1.222531939 | 0.08 | 75.90% |
| PCOS | TAG (51:4) levels | IVW | 15 | 0.207417076011014 | 0.080738335044664 | 0.0101991388356689 | 1.230495675 | 0.081 | 79.00% |
| PCOS | PC (O-17:0_17:1) levels | IVW | 15 | 0.20924672298291 | 0.0926546686062532 | 0.0239238122859866 | 1.232749109 | 0.0521 | 60.90% |
| PCOS | PC (18:0_18:1) levels | IVW | 18 | 0.224713473140993 | 0.0874951452470142 | 0.0102199706267148 | 1.251963943 | 0.0595 | 72.50% |
| PCOS | DAG (16:1_18:1) levels | IVW | 13 | 0.239784608736485 | 0.093084980912339 | 0.00999577955045127 | 1.270975364 | 0.0537 | 74.30% |
| PCOS | PI (16:0_18:2) levels | IVW | 19 | 0.240581253186614 | 0.0767652933608356 | 0.00172449860466814 | 1.271988283 | 0.1008 | 94.80% |
| PCOS | TAG (50:3) levels | IVW | 16 | 0.243584177011389 | 0.0811995999474591 | 0.00270139271346707 | 1.275813708 | 0.0701 | 85.50% |
| PCOS | TAG (50:2) levels | IVW | 9 | 0.244756507135881 | 0.110655348857605 | 0.0269748612620509 | 1.277310259 | 0.039 | 62.00% |
| PCOS | TAG (49:1) levels | IVW | 11 | 0.261951464151907 | 0.115149008904541 | 0.0229124588872777 | 1.29946347 | 0.0428 | 72.10% |
| PCOS | TAG (54:6) levels | IVW | 9 | 0.268234157435956 | 0.107469416159442 | 0.0125633922713469 | 1.307653301 | 0.0405 | 71.00% |
| PCOS | PC (17:0_18:2) levels | IVW | 14 | 0.299896698007442 | 0.0961756150259947 | 0.00181947114712517 | 1.349719372 | 0.0498 | 88.10% |
| PCOS | TAG (48:3) levels | IVW | 17 | 0.307069521065303 | 0.0925468681769938 | 9.0667948177231e-4 | 1.359435474 | 0.0665 | 96.10% |
| PCOS | TAG (48:2) levels | IVW | 14 | 0.311393382632649 | 0.0935565400685096 | 8.7347044610259e-4 | 1.365326211 | 0.0528 | 91.90% |
| PCOS | PC (O-16:0_16:0) levels | IVW | 7 | 0.345470787421365 | 0.141911119869553 | 0.0149158163013268 | 1.412654823 | 0.0233 | 69.00% |
| PCOS | TAG (48:1) levels | IVW | 11 | 0.383447176024966 | 0.109916711929767 | 4.8569375507996e-4 | 1.46733404 | 0.0404 | 94.90% |
| PCOS | TAG (50:1) levels | IVW | 11 | 0.452119479488778 | 0.103815104471433 | 1.33039422100246e-5 | 1.571639716 | 0.0428 | 99.30% |
| DAG (18:1_18:1) levels | Overall physical activity time | IVW | 47 | -0.386402608 | 0.113190031411343 | 6.407505505379e-4 | 0.6794969 | 0.0125 | 95.50% |
| TAG (49:1) levels | Overall physical activity time | IVW | 47 | -0.36228872 | 0.132142418746752 | 0.0061130797722957 | 0.696081366 | 0.0125 | 92.90% |
| DAG (18:1_18:2) levels | Overall physical activity time | IVW | 47 | -0.35024942 | 0.116611836830923 | 0.00266850170622459 | 0.704512349 | 0.0125 | 91.30% |
| TAG (50:2) levels | Overall physical activity time | IVW | 47 | -0.316114564 | 0.123069976524072 | 0.0102117374063204 | 0.728975931 | 0.0125 | 84.90% |
| TAG (50:3) levels | Overall physical activity time | IVW | 47 | -0.30747686 | 0.125701379763274 | 0.014441503437981 | 0.735299882 | 0.0125 | 82.90% |
| TAG (54:6) levels | Overall physical activity time | IVW | 47 | -0.293143952 | 0.115633996740579 | 0.0112414654872206 | 0.745914757 | 0.0125 | 79.30% |
| TAG (51:4) levels | Overall physical activity time | IVW | 47 | -0.279707153 | 0.132125807727009 | 0.0342618916003158 | 0.756005103 | 0.0125 | 75.50% |
| TAG (50:1) levels | Overall physical activity time | IVW | 47 | -0.278491495 | 0.115943171773252 | 0.016307247518744 | 0.756924705 | 0.0125 | 75.10% |
| DAG (16:1_18:1) levels | Overall physical activity time | IVW | 47 | -0.265328396 | 0.124046400750846 | 0.0324401441562618 | 0.766954044 | 0.0125 | 71.00% |
| TAG (48:1) levels | Overall physical activity time | IVW | 47 | -0.24832436 | 0.115964168622054 | 0.0322427056908623 | 0.780106867 | 0.0125 | 65.20% |
| TAG (50:4) levels | Leisure screen time | IVW | 95 | 0.16126852870028 | 0.0740983657002562 | 0.0295245112494196 | 1.175000448 | 0.008 | 23.00% |
| TAG (50:3) levels | Leisure screen time | IVW | 99 | 0.165005053417713 | 0.0786302460265208 | 0.0358615810993576 | 1.179399079 | 0.008 | 23.90% |
| PC (18:0_22:5) levels | Leisure screen time | IVW | 99 | 0.16541202662216 | 0.0751905474259067 | 0.0278136685712505 | 1.17987916 | 0.008 | 24.00% |
| DAG (18:1_18:2) levels | Leisure screen time | IVW | 96 | 0.173791600907389 | 0.0766421712414924 | 0.0233553382243739 | 1.189807585 | 0.008 | 26.00% |
| TAG (50:2) levels | Leisure screen time | IVW | 99 | 0.174687853959727 | 0.0773027065265877 | 0.0238343108143931 | 1.190874432 | 0.008 | 26.20% |
| PI (18:0_18:1) levels | Leisure screen time | IVW | 99 | 0.175373725674609 | 0.0788957647031611 | 0.0262256810509145 | 1.191691499 | 0.008 | 26.40% |
| TAG (50:1) levels | Leisure screen time | IVW | 95 | 0.18162356801989 | 0.07396165097032 | 0.0140631954477136 | 1.199162706 | 0.008 | 28.00% |

| **Table S7. Instrumental variables included in lipidomics** | | | | | | | | | | | | | |
| --- | --- | --- | --- | --- | --- | --- | --- | --- | --- | --- | --- | --- | --- |
| **SNP** | **effect_allele.exposure** | **other_allele.exposure** | **beta.exposure** | **se.exposure** | **id.exposure** | **eaf.exposure** | **exposure** | **mr_keep** | **outcome** | **pval.exposure** | **pval.outcome** | **R2** | **F** |
| rs10760286 | C | T | 0.0827796 | 0.0169512 | GCST90277241 | 0.510018 | CE (27:1/16:1) levels | TRUE | PCOS | 1.04268611803522e-6 | 0.0862661 | 0.00331408612623317 | 23.8410086811976 |
| rs11119973 | A | C | 0.110738 | 0.0231985 | GCST90277241 | 0.152837 | CE (27:1/16:1) levels | TRUE | PCOS | 1.81053090436888e-6 | 0.124184 | 0.00316705527948204 | 22.7799316567059 |
| rs111656006 | T | C | 0.185117 | 0.0400311 | GCST90277241 | 0.0482842 | CE (27:1/16:1) levels | TRUE | PCOS | 3.75811909655059e-6 | 0.513075 | 0.00297279039161193 | 21.3784607906835 |
| rs113130033 | G | A | -0.194002 | 0.0409637 | GCST90277241 | 0.0429959 | CE (27:1/16:1) levels | TRUE | PCOS | 2.18032260408855e-6 | 0.747865 | 0.00311758078896633 | 22.42295965 |
| rs11647818 | T | C | 0.0838631 | 0.0169791 | GCST90277241 | 0.57458 | CE (27:1/16:1) levels | TRUE | PCOS | 7.84454007677835e-7 | 0.293216 | 0.00338998252224509 | 24.3888524681018 |
| rs116917626 | T | C | -0.259409 | 0.0524879 | GCST90277241 | 0.0275072 | CE (27:1/16:1) levels | TRUE | PCOS | 7.72209949152572e-7 | 0.425362 | 0.00339417962981535 | 24.4191509304415 |
| rs142738732 | A | T | -0.165625 | 0.0349561 | GCST90277241 | 0.0633803 | CE (27:1/16:1) levels | TRUE | PCOS | 2.15746500401276e-6 | 0.660287 | 0.00312038563936343 | 22.4431964621778 |
| rs17603855 | T | C | 0.169155 | 0.0356528 | GCST90277241 | 0.0575024 | CE (27:1/16:1) levels | TRUE | PCOS | 2.09013569410413e-6 | 0.13919 | 0.00312882412025358 | 22.5040802513126 |
| rs1800961 | T | C | -0.204194 | 0.0372477 | GCST90277241 | 0.0524109 | CE (27:1/16:1) levels | TRUE | PCOS | 4.20409650716644e-8 | 0.118661 | 0.00417283028996919 | 30.0445640459791 |
| rs187429064 | G | A | -0.217301 | 0.0378548 | GCST90277241 | 0.0535314 | CE (27:1/16:1) levels | TRUE | PCOS | 9.446340823255731e-9 | 0.250577 | 0.00457351857283086 | 32.9427926411826 |
| rs274673 | C | T | 0.185974 | 0.0392848 | GCST90277241 | 0.951733 | CE (27:1/16:1) levels | TRUE | PCOS | 2.20144443553278e-6 | 0.561335 | 0.00311501502058128 | 22.4044478892707 |
| rs5022521 | T | C | -0.108256 | 0.0212057 | GCST90277241 | 0.797291 | CE (27:1/16:1) levels | TRUE | PCOS | 3.30720157498775e-7 | 0.0834834 | 0.00362062191315932 | 26.0541914940052 |
| rs603424 | A | G | -0.155845 | 0.0259739 | GCST90277241 | 0.121331 | CE (27:1/16:1) levels | TRUE | PCOS | 1.9724268759944103e-9 | 0.73479 | 0.00499455265196581 | 35.9906999605288 |
| rs7355269 | C | T | 0.243229 | 0.0529062 | GCST90277241 | 0.0260757 | CE (27:1/16:1) levels | TRUE | PCOS | 4.27872035490417e-6 | 0.990999 | 0.00293832150511666 | 21.1298514887157 |
| rs80227620 | T | C | 0.116755 | 0.0243943 | GCST90277241 | 0.143969 | CE (27:1/16:1) levels | TRUE | PCOS | 1.70003342767442e-6 | 0.29327 | 0.00318382399523718 | 22.9009305781385 |
| rs118137821 | T | C | -0.268507 | 0.0587186 | GCST90277248 | 0.0261831 | CE (27:1/20:2) levels | TRUE | PCOS | 4.81304793577675e-6 | 0.679185 | 0.00356288963319797 | 20.9031283349212 |
| rs1404999 | T | C | -0.101886 | 0.0200767 | GCST90277248 | 0.313745 | CE (27:1/20:2) levels | TRUE | PCOS | 3.87826280332916e-7 | 0.522282 | 0.00438458620725402 | 25.7451728975972 |
| rs182695896 | C | A | 0.285848 | 0.059393 | GCST90277248 | 0.025305 | CE (27:1/20:2) levels | TRUE | PCOS | 1.48813036676458e-6 | 0.920719 | 0.0039452600375384 | 23.155344032918 |
| rs1903973 | A | G | 0.0864271 | 0.0183767 | GCST90277248 | 0.555794 | CE (27:1/20:2) levels | TRUE | PCOS | 2.56265281458598e-6 | 0.625468 | 0.00376806102404705 | 22.1114018581076 |
| rs36194627 | A | G | 0.29301 | 0.0639463 | GCST90277248 | 0.022932 | CE (27:1/20:2) levels | TRUE | PCOS | 4.60272542514951e-6 | 0.779941 | 0.00357742253810133 | 20.9886975975713 |
| rs4245791 | T | C | -0.256295 | 0.0217247 | GCST90277248 | 0.772602 | CE (27:1/20:2) levels | TRUE | PCOS | 4.02552576039645e-32 | 0.45852 | 0.0232461198612691 | 139.131074339503 |
| rs429358 | C | T | 0.162093 | 0.0237247 | GCST90277248 | 0.189202 | CE (27:1/20:2) levels | TRUE | PCOS | 8.359500794332099e-12 | 0.994225 | 0.00791893644793023 | 46.6636287853814 |
| rs4778971 | G | A | -0.0902497 | 0.0196803 | GCST90277248 | 0.609431 | CE (27:1/20:2) levels | TRUE | PCOS | 4.52275543802334e-6 | 0.721592 | 0.00358312381644584 | 21.0222672172843 |
| rs55837134 | A | G | 0.0994255 | 0.0217518 | GCST90277248 | 0.239304 | CE (27:1/20:2) levels | TRUE | PCOS | 4.85612967498484e-6 | 0.515087 | 0.0035599914699018702 | 20.8860643439506 |
| rs56276984 | T | C | -0.167871 | 0.0361864 | GCST90277248 | 0.0692454 | CE (27:1/20:2) levels | TRUE | PCOS | 3.49991861159663e-6 | 0.134832 | 0.00366655278799715 | 21.513548158612 |
| rs567249312 | A | G | -0.306469 | 0.0641297 | GCST90277248 | 0.0207737 | CE (27:1/20:2) levels | TRUE | PCOS | 1.76262610415606e-6 | 0.0578482 | 0.00389004479590621 | 22.8300116448573 |
| rs6490297 | C | T | -0.0941881 | 0.0198133 | GCST90277248 | 0.313198 | CE (27:1/20:2) levels | TRUE | PCOS | 1.99646749614287e-6 | 0.803586 | 0.0038494268117966 | 22.5907104281827 |
| rs6709904 | G | A | -0.211386 | 0.0319064 | GCST90277248 | 0.0998144 | CE (27:1/20:2) levels | TRUE | PCOS | 3.46799031600827e-11 | 0.277031 | 0.00744975461174013 | 43.8781468873616 |
| rs6755057 | C | G | -0.179938 | 0.0371773 | GCST90277248 | 0.934547 | CE (27:1/20:2) levels | TRUE | PCOS | 1.29841448291754e-6 | 0.0241774 | 0.00398975774601967 | 23.417554151299 |
| rs7202845 | C | A | 0.0987036 | 0.0198041 | GCST90277248 | 0.670481 | CE (27:1/20:2) levels | TRUE | PCOS | 6.22836386114716e-7 | 0.156371 | 0.00422968064443842 | 24.8317433917789 |
| rs75823353 | G | A | 0.16864 | 0.0357133 | GCST90277248 | 0.0729211 | CE (27:1/20:2) levels | TRUE | PCOS | 2.33478884996058e-6 | 0.0361968 | 0.00379840345753863 | 22.2901335330518 |
| rs7853989 | C | G | -0.133323 | 0.025785 | GCST90277248 | 0.155857 | CE (27:1/20:2) levels | TRUE | PCOS | 2.33388171966659e-7 | 0.174881 | 0.00455079866508746 | 26.7255917835134 |
| rs7933 | G | A | 0.105612 | 0.0197416 | GCST90277248 | 0.329175 | CE (27:1/20:2) levels | TRUE | PCOS | 8.80912136668238e-8 | 0.696178 | 0.00487005949763792 | 28.609698758354 |
| rs9504426 | G | C | -0.0923357 | 0.0189735 | GCST90277248 | 0.377685 | CE (27:1/20:2) levels | TRUE | PCOS | 1.13556737735404e-6 | 0.609931 | 0.00403349717198508 | 23.6753187988458 |
| rs10502551 | G | C | -0.212813 | 0.0415968 | GCST90277260 | 0.0508576 | DAG (16:1_18:1) levels | TRUE | PCOS | 3.11933171365256e-7 | 0.363695 | 0.00419382347628363 | 26.1659606783225 |
| rs111750990 | C | A | -0.214278 | 0.0455897 | GCST90277260 | 0.0413621 | DAG (16:1_18:1) levels | TRUE | PCOS | 2.59982428007364e-6 | 0.550315 | 0.00354192692371984 | 22.0842126444258 |
| rs11182480 | C | T | 0.345205 | 0.069573 | GCST90277260 | 0.0177771 | DAG (16:1_18:1) levels | TRUE | PCOS | 6.98548418161061e-7 | 0.708753 | 0.00394561415393594 | 24.6112070653464 |
| rs112122274 | G | A | -0.259929 | 0.0525045 | GCST90277260 | 0.0359716 | DAG (16:1_18:1) levels | TRUE | PCOS | 7.39834192430035e-7 | 0.533758 | 0.00392795079140193 | 24.5005954000717 |
| rs11775636 | A | G | -0.113375 | 0.0242701 | GCST90277260 | 0.15754 | DAG (16:1_18:1) levels | TRUE | PCOS | 2.99174446671622e-6 | 0.544506 | 0.00349887260534056 | 21.814822782806 |
| rs1260326 | C | T | -0.11192 | 0.0186705 | GCST90277260 | 0.650878 | DAG (16:1_18:1) levels | TRUE | PCOS | 2.0413347148881503e-9 | 0.0210349 | 0.00574855385163986 | 35.9222661617422 |
| rs140283718 | A | T | -0.265886 | 0.0571052 | GCST90277260 | 0.0256515 | DAG (16:1_18:1) levels | TRUE | PCOS | 3.22297146364116e-6 | 0.479294 | 0.00347605175704912 | 21.6720427086826 |
| rs2182380 | G | A | 0.260746 | 0.0543597 | GCST90277260 | 0.03059 | DAG (16:1_18:1) levels | TRUE | PCOS | 1.61318268636803e-6 | 0.557598 | 0.00368837671004379 | 23.0007198187959 |
| rs2524075 | T | C | -0.107183 | 0.0218188 | GCST90277260 | 0.208006 | DAG (16:1_18:1) levels | TRUE | PCOS | 8.99613957837479e-7 | 0.676486 | 0.00386781713285368 | 24.1240552807487 |
| rs77134026 | A | G | 0.257957 | 0.055336 | GCST90277260 | 0.0306174 | DAG (16:1_18:1) levels | TRUE | PCOS | 3.13686092703632e-6 | 0.728471 | 0.0034843526163029 | 21.7239768004912 |
| rs7910473 | T | C | 0.284781 | 0.0610289 | GCST90277260 | 0.977325 | DAG (16:1_18:1) levels | TRUE | PCOS | 3.06626789182911e-6 | 0.443272 | 0.00349132988307988 | 21.7676305425724 |
| rs7955732 | T | G | -0.0886008 | 0.0182566 | GCST90277260 | 0.422862 | DAG (16:1_18:1) levels | TRUE | PCOS | 1.2155662078124e-6 | 0.213715 | 0.00377530164628871 | 23.5448379940322 |
| rs964184 | C | G | -0.163958 | 0.0246535 | GCST90277260 | 0.848991 | DAG (16:1_18:1) levels | TRUE | PCOS | 2.9210719277707295e-11 | 0.0876536 | 0.00706622088444063 | 44.2148623386899 |
| rs10169217 | G | A | -0.0982652 | 0.0182234 | GCST90277261 | 0.676036 | DAG (18:1_18:1) levels | TRUE | PCOS | 6.95793520103522e-8 | 0.55597 | 0.00420600042513674 | 29.067954755852 |
| rs1042034 | T | C | 0.10387 | 0.0190302 | GCST90277261 | 0.727594 | DAG (18:1_18:1) levels | TRUE | PCOS | 4.81076453102448e-8 | 0.239932 | 0.00430900774445953 | 29.7829261568329 |
| rs116011373 | A | G | -0.186075 | 0.0398387 | GCST90277261 | 0.0487529 | DAG (18:1_18:1) levels | TRUE | PCOS | 3.00160978081746e-6 | 0.507973 | 0.00315900829083202 | 21.8091904710202 |
| rs116796527 | T | C | -0.337288 | 0.0717999 | GCST90277261 | 0.0143341 | DAG (18:1_18:1) levels | TRUE | PCOS | 2.63222141843166e-6 | 0.658083 | 0.00319538564390375 | 22.0611378445021 |
| rs1260326 | C | T | -0.122667 | 0.0177922 | GCST90277261 | 0.650878 | DAG (18:1_18:1) levels | TRUE | PCOS | 5.40828634751873e-12 | 0.0210349 | 0.00685751684145644 | 47.5192952705149 |
| rs139500046 | C | A | -0.392874 | 0.0806545 | GCST90277261 | 0.011246 | DAG (18:1_18:1) levels | TRUE | PCOS | 1.10993520935766e-6 | 0.839844 | 0.00343490067053922 | 23.7204638518411 |
| rs147782497 | A | C | 0.258536 | 0.0564599 | GCST90277261 | 0.0242209 | DAG (18:1_18:1) levels | TRUE | PCOS | 4.66962253801719e-6 | 0.571513 | 0.00303668788162629 | 20.9621414823646 |
| rs157582 | T | C | 0.0943821 | 0.0205469 | GCST90277261 | 0.223336 | DAG (18:1_18:1) levels | TRUE | PCOS | 4.35881679889639e-6 | 0.281635 | 0.0030557419231503 | 21.0940739612538 |
| rs17596144 | T | C | 0.130967 | 0.0238742 | GCST90277261 | 0.151717 | DAG (18:1_18:1) levels | TRUE | PCOS | 4.11805928286394e-8 | 0.512726 | 0.00435242086792257 | 30.0842999479334 |
| rs268 | G | A | 0.281466 | 0.0580317 | GCST90277261 | 0.0226757 | DAG (18:1_18:1) levels | TRUE | PCOS | 1.23330097287142e-6 | 0.158606 | 0.00340564095039619 | 23.5177139101788 |
| rs35332062 | A | G | -0.143787 | 0.025949 | GCST90277261 | 0.121986 | DAG (18:1_18:1) levels | TRUE | PCOS | 3.00511607242346e-8 | 0.85768200000000006 | 0.00444042343230476 | 30.6952941645913 |
| rs36094040 | C | T | -0.0828741 | 0.0181348 | GCST90277261 | 0.348202 | DAG (18:1_18:1) levels | TRUE | PCOS | 4.87972722642403e-6 | 0.0790187 | 0.00302451489264412 | 20.8778568802376 |
| rs3770813 | T | G | -0.24588 | 0.052062 | GCST90277261 | 0.0277123 | DAG (18:1_18:1) levels | TRUE | PCOS | 2.32584720345753e-6 | 0.178468 | 0.00322967596260406 | 22.2986473800832 |
| rs62046299 | C | T | 0.36387 | 0.0722036 | GCST90277261 | 0.016456 | DAG (18:1_18:1) levels | TRUE | PCOS | 4.66751054691623e-7 | 0.674011 | 0.00367565447422773 | 25.3891759297383 |
| rs62291573 | C | T | 0.106679 | 0.0214718 | GCST90277261 | 0.214362 | DAG (18:1_18:1) levels | TRUE | PCOS | 6.75317739572156e-7 | 0.573097 | 0.00357293912943171 | 24.6771369971284 |
| rs76950187 | G | A | 0.159728 | 0.0325695 | GCST90277261 | 0.0744995 | DAG (18:1_18:1) levels | TRUE | PCOS | 9.3799216741832e-7 | 0.431628 | 0.00348164402964614 | 24.044388212692 |
| rs7782961 | T | A | 0.0946344 | 0.0203859 | GCST90277261 | 0.231896 | DAG (18:1_18:1) levels | TRUE | PCOS | 3.44802856619552e-6 | 0.583062 | 0.00312061391563079 | 21.5432932681321 |
| rs964184 | C | G | -0.263829 | 0.0234323 | GCST90277261 | 0.848991 | DAG (18:1_18:1) levels | TRUE | PCOS | 2.08639310490692e-29 | 0.0876536 | 0.0180821275399769 | 126.732800390276 |
| rs9865586 | G | A | -0.106769 | 0.0225922 | GCST90277261 | 0.16497 | DAG (18:1_18:1) levels | TRUE | PCOS | 2.29072325787609e-6 | 0.754519 | 0.00323389341964437 | 22.3278604349278 |
| rs1042034 | T | C | 0.0933662 | 0.0194673 | GCST90277262 | 0.727594 | DAG (18:1_18:2) levels | TRUE | PCOS | 1.61822587996543e-6 | 0.239932 | 0.00346626216919119 | 22.9951664761535 |
| rs10773708 | A | G | -0.0871411 | 0.0188187 | GCST90277262 | 0.682589 | DAG (18:1_18:2) levels | TRUE | PCOS | 3.64679908839436e-6 | 0.829853 | 0.00323193361013335 | 21.4355915052304 |
| rs11668758 | T | C | 0.0962473 | 0.0190611 | GCST90277262 | 0.306566 | DAG (18:1_18:2) levels | TRUE | PCOS | 4.43177754721476e-7 | 0.153222 | 0.00384070948371387 | 25.4888255709314 |
| rs11684166 | A | G | 0.106307 | 0.0228942 | GCST90277262 | 0.176517 | DAG (18:1_18:2) levels | TRUE | PCOS | 3.42716711236493e-6 | 0.970472 | 0.003249829495337 | 21.5546718018569 |
| rs117416257 | T | C | -0.604472 | 0.130717 | GCST90277262 | 0.00456826 | DAG (18:1_18:2) levels | TRUE | PCOS | 3.75901931344589e-6 | 0.190044 | 0.00322320278894719 | 21.3774976477689 |
| rs1233660 | A | T | -0.0976838 | 0.0208965 | GCST90277262 | 0.220513 | DAG (18:1_18:2) levels | TRUE | PCOS | 2.94456983880713e-6 | 0.206155 | 0.0032935687007452 | 21.8457331034207 |
| rs12365864 | G | A | 0.123537 | 0.0235387 | GCST90277262 | 0.166329 | DAG (18:1_18:2) levels | TRUE | PCOS | 1.53550205118619e-7 | 0.263031 | 0.00414787333726773 | 27.5358056668225 |
| rs1260326 | C | T | -0.128985 | 0.0180533 | GCST90277262 | 0.650878 | DAG (18:1_18:2) levels | TRUE | PCOS | 9.020765349664199e-13 | 0.0210349 | 0.00765997239984043 | 51.0309733829958 |
| rs141116593 | G | C | 0.155326 | 0.0331375 | GCST90277262 | 0.0740121 | DAG (18:1_18:2) levels | TRUE | PCOS | 2.76808687764219e-6 | 0.940136 | 0.00331138600834 | 21.9643051940382 |
| rs157582 | T | C | 0.117905 | 0.0208635 | GCST90277262 | 0.223336 | DAG (18:1_18:2) levels | TRUE | PCOS | 1.59278757027705e-8 | 0.281635 | 0.00480617150598043 | 31.927046688099 |
| rs17007519 | T | C | -0.301082 | 0.0603587 | GCST90277262 | 0.0218632 | DAG (18:1_18:2) levels | TRUE | PCOS | 6.09406304589179e-7 | 0.412007 | 0.00374852390598705 | 24.8747350815888 |
| rs1874124 | T | C | 0.118137 | 0.0243982 | GCST90277262 | 0.151915 | DAG (18:1_18:2) levels | TRUE | PCOS | 1.28514484694756e-6 | 0.490245 | 0.00353281406832237 | 23.4382367381645 |
| rs2352723 | C | T | -0.112348 | 0.0203979 | GCST90277262 | 0.76854 | DAG (18:1_18:2) levels | TRUE | PCOS | 3.6330071493175e-8 | 0.0130437 | 0.00456639577411376 | 30.3269272149422 |
| rs268 | G | A | 0.336 | 0.0582284 | GCST90277262 | 0.0226757 | DAG (18:1_18:2) levels | TRUE | PCOS | 7.909292970219781e-9 | 0.158606 | 0.00500990024097593 | 33.2872161251788 |
| rs4608457 | T | C | -0.199572 | 0.0417726 | GCST90277262 | 0.0452902 | DAG (18:1_18:2) levels | TRUE | PCOS | 1.77416169943977e-6 | 0.716153 | 0.0034397055058645 | 22.8183816121364 |
| rs55788915 | A | C | -0.251482 | 0.0527715 | GCST90277262 | 0.0310445 | DAG (18:1_18:2) levels | TRUE | PCOS | 1.88396224846485e-6 | 0.629331 | 0.00342237459200156 | 22.7030166550844 |
| rs62291573 | C | T | 0.100201 | 0.021883 | GCST90277262 | 0.214362 | DAG (18:1_18:2) levels | TRUE | PCOS | 4.67332504499634e-6 | 0.573097 | 0.00316050951892576 | 20.9603738908204 |
| rs7239207 | C | T | -0.0861675 | 0.0188601 | GCST90277262 | 0.694138 | DAG (18:1_18:2) levels | TRUE | PCOS | 4.90589704556944e-6 | 0.953366 | 0.0031465294862862 | 20.8673662169408 |
| rs72694990 | A | G | -0.120548 | 0.026121 | GCST90277262 | 0.128652 | DAG (18:1_18:2) levels | TRUE | PCOS | 3.93125388384112e-6 | 0.314772 | 0.00321029867909953 | 21.291637081927 |
| rs72836628 | T | C | -0.0902347 | 0.0190111 | GCST90277262 | 0.296584 | DAG (18:1_18:2) levels | TRUE | PCOS | 2.07046691287603e-6 | 0.496583 | 0.00339513575952928 | 22.5217067582286 |
| rs75008187 | A | G | 0.128795 | 0.0262843 | GCST90277262 | 0.127817 | DAG (18:1_18:2) levels | TRUE | PCOS | 9.58008442253523e-7 | 0.0345939 | 0.0036177008916914 | 24.0034579261148 |
| rs75596627 | A | G | 0.127897 | 0.0278959 | GCST90277262 | 0.113988 | DAG (18:1_18:2) levels | TRUE | PCOS | 4.54430733707479e-6 | 0.680647 | 0.00316856894022687 | 21.013993551116 |
| rs79624003 | G | A | -0.172297 | 0.0265336 | GCST90277262 | 0.122045 | DAG (18:1_18:2) levels | TRUE | PCOS | 8.38423434364805e-11 | 0.877003 | 0.00633583967285142 | 42.1533127082196 |
| rs964184 | C | G | -0.291138 | 0.0237376 | GCST90277262 | 0.848991 | DAG (18:1_18:2) levels | TRUE | PCOS | 1.39878585418869e-34 | 0.0876536 | 0.0222411583945773 | 150.3809446 |
| rs10917404 | T | C | -0.0980141 | 0.0210591 | GCST90277275 | 0.226612 | PC (15:0_18:1) levels | TRUE | PCOS | 3.25178287881141e-6 | 0.155901 | 0.00333791616336667 | 21.6552493190527 |
| rs11075022 | C | T | 0.085736 | 0.0178499 | GCST90277275 | 0.570046 | PC (15:0_18:1) levels | TRUE | PCOS | 1.56177735929724e-6 | 0.377715 | 0.00355417282644951 | 23.063252280367 |
| rs12926159 | A | G | -0.431442 | 0.0795666 | GCST90277275 | 0.0127734 | PC (15:0_18:1) levels | TRUE | PCOS | 5.88038304807836e-8 | 0.120849 | 0.00452525934203947 | 29.3933393892924 |
| rs1532085 | G | A | -0.0894363 | 0.0177315 | GCST90277275 | 0.573441 | PC (15:0_18:1) levels | TRUE | PCOS | 4.5608567655913e-7 | 0.715769 | 0.00391797613776284 | 25.4332806936372 |
| rs2379129 | A | C | -0.0945557 | 0.018017 | GCST90277275 | 0.399474 | PC (15:0_18:1) levels | TRUE | PCOS | 1.53644299782392e-7 | 0.578389 | 0.00424028465482697 | 27.5344344178525 |
| rs41441450 | T | C | -0.408356 | 0.089449 | GCST90277275 | 0.00982439 | PC (15:0_18:1) levels | TRUE | PCOS | 4.9892727446096e-6 | 0.406005 | 0.00321188319728952 | 20.8349561994072 |
| rs581080 | C | G | 0.116947 | 0.0249215 | GCST90277275 | 0.856198 | PC (15:0_18:1) levels | TRUE | PCOS | 2.69735067838608e-6 | 0.269075 | 0.00339299903689425 | 22.0138246584226 |
| rs6866162 | C | T | 0.134102 | 0.0277161 | GCST90277275 | 0.126532 | PC (15:0_18:1) levels | TRUE | PCOS | 1.30878502682405e-6 | 0.279498 | 0.00360634451826969 | 23.403023018907 |
| rs115686032 | T | C | -0.19914 | 0.0428365 | GCST90277297 | 0.039223 | PC (17:0_18:2) levels | TRUE | PCOS | 3.33808328280468e-6 | 0.894353 | 0.00300512690432599 | 21.6056774528084 |
| rs1168104 | G | A | 0.0861307 | 0.0188479 | GCST90277297 | 0.737655 | PC (17:0_18:2) levels | TRUE | PCOS | 4.88243444278522e-6 | 0.673797 | 0.00290407482231153 | 20.8770368032739 |
| rs17231506 | T | C | 0.096675 | 0.0185388 | GCST90277297 | 0.27829 | PC (17:0_18:2) levels | TRUE | PCOS | 1.84076410591142e-7 | 0.107792 | 0.00377834789864791 | 27.1859155845299 |
| rs1800588 | T | C | 0.114618 | 0.0193524 | GCST90277297 | 0.258046 | PC (17:0_18:2) levels | TRUE | PCOS | 3.16744022773711e-9 | 0.944525 | 0.00486852378139789 | 35.0683093631681 |
| rs192537901 | C | T | -0.257169 | 0.052724 | GCST90277297 | 0.0259671 | PC (17:0_18:2) levels | TRUE | PCOS | 1.07359457591704e-6 | 0.0548062 | 0.0033072169676366 | 23.7847926939884 |
| rs2126260 | C | T | 0.0913122 | 0.0190722 | GCST90277297 | 0.748849 | PC (17:0_18:2) levels | TRUE | PCOS | 1.68693532774808e-6 | 0.180418 | 0.0031867696046212 | 22.9157918749376 |
| rs34489224 | G | C | 0.088298 | 0.019079 | GCST90277297 | 0.265914 | PC (17:0_18:2) levels | TRUE | PCOS | 3.69177771640466e-6 | 0.847673 | 0.00297835149211185 | 21.4125977378804 |
| rs422137 | A | G | 0.0853888 | 0.016775 | GCST90277297 | 0.492559 | PC (17:0_18:2) levels | TRUE | PCOS | 3.57607904447624e-7 | 0.197939 | 0.00360073372433061 | 25.9033303310975 |
| rs4840981 | G | C | 0.338788 | 0.0734569 | GCST90277297 | 0.987017 | PC (17:0_18:2) levels | TRUE | PCOS | 3.98688206036175e-6 | 0.0337925 | 0.00295791153646747 | 21.2652105048766 |
| rs6498540 | G | A | 0.09016 | 0.0177383 | GCST90277297 | 0.334003 | PC (17:0_18:2) levels | TRUE | PCOS | 3.71936781725186e-7 | 0.884705 | 0.00359023300461145 | 25.827516980947 |
| rs73058910 | C | T | 0.168904 | 0.0365155 | GCST90277297 | 0.0633156 | PC (17:0_18:2) levels | TRUE | PCOS | 3.73619041777281e-6 | 0.216947 | 0.0029751727199942 | 21.3896760375549 |
| rs7437408 | G | A | 0.0770792 | 0.0167986 | GCST90277297 | 0.477932 | PC (17:0_18:2) levels | TRUE | PCOS | 4.46592031592892e-6 | 0.651975 | 0.00292776144707763 | 21.0478170399271 |
| rs78592970 | T | G | -0.12831 | 0.0255392 | GCST90277297 | 0.127465 | PC (17:0_18:2) levels | TRUE | PCOS | 5.05953037521173e-7 | 0.258859 | 0.00350801213648797 | 25.2339520042282 |
| rs964184 | C | G | -0.154483 | 0.023164 | GCST90277297 | 0.848991 | PC (17:0_18:2) levels | TRUE | PCOS | 2.5737929804152896e-11 | 0.0876536 | 0.00616494818918585 | 44.4644697724912 |
| rs11197775 | C | T | 0.0767146 | 0.0167215 | GCST90277299 | 0.531683 | PC (18:0_18:1) levels | TRUE | PCOS | 4.4797965086924e-6 | 0.586156 | 0.00292571667965501 | 21.041876879965 |
| rs117207178 | T | C | 0.138016 | 0.0285669 | GCST90277299 | 0.0971648 | PC (18:0_18:1) levels | TRUE | PCOS | 1.35626878781225e-6 | 0.751592 | 0.00324355201487896 | 23.3352004350858 |
| rs150862068 | T | C | -0.741745 | 0.160682 | GCST90277299 | 0.00286202 | PC (18:0_18:1) levels | TRUE | PCOS | 3.90774657385159e-6 | 0.581818 | 0.00296200423860594 | 21.3036338488011 |
| rs151331635 | T | A | 0.302354 | 0.0640853 | GCST90277299 | 0.0206277 | PC (18:0_18:1) levels | TRUE | PCOS | 2.38182629111576e-6 | 0.223129 | 0.0030936283183991 | 22.2532519616851 |
| rs16916055 | C | T | 0.421103 | 0.0915308 | GCST90277299 | 0.00880666 | PC (18:0_18:1) levels | TRUE | PCOS | 4.2113428280081e-6 | 0.533406 | 0.00294212885832291 | 21.1602622612822 |
| rs181751380 | A | G | 0.227681 | 0.0470724 | GCST90277299 | 0.0337463 | PC (18:0_18:1) levels | TRUE | PCOS | 1.31928934663929e-6 | 0.644203 | 0.00325091722251466 | 23.388361028326 |
| rs2169387 | G | A | 0.107289 | 0.0234477 | GCST90277299 | 0.849991 | PC (18:0_18:1) levels | TRUE | PCOS | 4.74692263069559e-6 | 0.308687 | 0.0029103369958757 | 20.9309426943064 |
| rs2183640 | A | G | -0.107241 | 0.0226767 | GCST90277299 | 0.161628 | PC (18:0_18:1) levels | TRUE | PCOS | 2.25487025522133e-6 | 0.721913 | 0.00310820169496662 | 22.3584087987306 |
| rs2708081 | C | T | -0.0826365 | 0.0167601 | GCST90277299 | 0.490334 | PC (18:0_18:1) levels | TRUE | PCOS | 8.19987020348417e-7 | 0.0324571 | 0.00337769468427082 | 24.303538513753 |
| rs2797620 | T | C | -0.102314 | 0.0175877 | GCST90277299 | 0.332583 | PC (18:0_18:1) levels | TRUE | PCOS | 5.978393973042881e-9 | 0.638716 | 0.00469577249305289 | 33.83225311 |
| rs34833702 | T | C | 0.18589 | 0.0379638 | GCST90277299 | 0.0521215 | PC (18:0_18:1) levels | TRUE | PCOS | 9.75553373785404e-7 | 0.447894 | 0.0033313683874025 | 23.9690925833703 |
| rs4629629 | T | C | 0.0938965 | 0.0196656 | GCST90277299 | 0.764985 | PC (18:0_18:1) levels | TRUE | PCOS | 1.80013560185231e-6 | 0.165746 | 0.00316814814624652 | 22.7909956072179 |
| rs535686 | C | T | -0.221494 | 0.0479939 | GCST90277299 | 0.0335591 | PC (18:0_18:1) levels | TRUE | PCOS | 3.93010476500227e-6 | 0.230091 | 0.00296048855344078 | 21.2927002119732 |
| rs612577 | C | T | -0.127516 | 0.0215863 | GCST90277299 | 0.179796 | PC (18:0_18:1) levels | TRUE | PCOS | 3.4783344906103603e-9 | 0.0680268 | 0.00484132732473645 | 34.8860530475564 |
| rs7252513 | A | G | 0.172287 | 0.0371009 | GCST90277299 | 0.0556654 | PC (18:0_18:1) levels | TRUE | PCOS | 3.4215512904563e-6 | 0.127675 | 0.00299730975433926 | 21.5583252268565 |
| rs73215839 | T | C | 0.240743 | 0.047273 | GCST90277299 | 0.0334803 | PC (18:0_18:1) levels | TRUE | PCOS | 3.53165816433264e-7 | 0.0859963 | 0.00360257287611963 | 25.9274556431005 |
| rs77191869 | C | T | -0.20742 | 0.0444713 | GCST90277299 | 0.0368946 | PC (18:0_18:1) levels | TRUE | PCOS | 3.0992285893128e-6 | 0.414775 | 0.00302360916353467 | 21.7480589420133 |
| rs8034802 | A | T | 0.0855686 | 0.0182908 | GCST90277299 | 0.310621 | PC (18:0_18:1) levels | TRUE | PCOS | 2.89359499403681e-6 | 0.827032 | 0.00304186224724246 | 21.8797493585285 |
| rs102275 | C | T | -0.285172 | 0.0171351 | GCST90277306 | 0.410377 | PC (18:0_22:5) levels | TRUE | PCOS | 3.4262716243100097e-62 | 0.89447 | 0.0391098446366989 | 276.893536246989 |
| rs113847854 | T | C | 0.231382 | 0.0493868 | GCST90277306 | 0.0302758 | PC (18:0_22:5) levels | TRUE | PCOS | 2.79825952381299e-6 | 0.971749 | 0.00321521956435948 | 21.943692485732 |
| rs115247383 | T | C | -0.20269 | 0.0424515 | GCST90277306 | 0.0485701 | PC (18:0_22:5) levels | TRUE | PCOS | 1.80042282469552e-6 | 0.258471 | 0.00333885809308643 | 22.7903453362371 |
| rs117135394 | T | C | 0.492072 | 0.102035 | GCST90277306 | 0.00742645 | PC (18:0_22:5) levels | TRUE | PCOS | 1.41712816597488e-6 | 0.017378 | 0.00340603489178122 | 23.2504472032113 |
| rs1220131 | A | T | 0.108182 | 0.0214051 | GCST90277306 | 0.200223 | PC (18:0_22:5) levels | TRUE | PCOS | 4.32585472584817e-7 | 0.132607 | 0.00373955777205976 | 25.5357037627937 |
| rs1260326 | C | T | -0.101199 | 0.0179027 | GCST90277306 | 0.650878 | PC (18:0_22:5) levels | TRUE | PCOS | 1.57925912814188e-8 | 0.0210349 | 0.00467361315365924 | 31.9438836390985 |
| rs1465411 | G | A | 0.079001 | 0.0170591 | GCST90277306 | 0.505704 | PC (18:0_22:5) levels | TRUE | PCOS | 3.63872148171349e-6 | 0.849566 | 0.00314165337854155 | 21.4400250613883 |
| rs147797702 | C | T | -0.461775 | 0.0917664 | GCST90277306 | 0.00935496 | PC (18:0_22:5) levels | TRUE | PCOS | 4.85210599457005e-7 | 0.0932567 | 0.00370725349760821 | 25.3142920419406 |
| rs183410044 | C | T | -0.329201 | 0.0690524 | GCST90277306 | 0.0159435 | PC (18:0_22:5) levels | TRUE | PCOS | 1.866106820307e-6 | 0.748488 | 0.00332880621081897 | 22.7215041362895 |
| rs2236514 | G | C | -0.0885172 | 0.0182625 | GCST90277306 | 0.647094 | PC (18:0_22:5) levels | TRUE | PCOS | 1.25381770724205e-6 | 0.638547 | 0.00344040857515079 | 23.4859006306758 |
| rs2797620 | T | C | -0.0857829 | 0.0180919 | GCST90277306 | 0.332583 | PC (18:0_22:5) levels | TRUE | PCOS | 2.12132618753903e-6 | 0.638716 | 0.00329285443931133 | 22.4752966309209 |
| rs34833702 | T | C | 0.197071 | 0.0389961 | GCST90277306 | 0.0521215 | PC (18:0_22:5) levels | TRUE | PCOS | 4.33541146647005e-7 | 0.447894 | 0.00373893674189887 | 25.531447120852 |
| rs4841133 | G | A | 0.120711 | 0.0240274 | GCST90277306 | 0.851776 | PC (18:0_22:5) levels | TRUE | PCOS | 5.06354059104271e-7 | 0.306531 | 0.0036952532576958 | 25.2320467149262 |
| rs58804619 | C | G | 0.104713 | 0.0218788 | GCST90277306 | 0.186036 | PC (18:0_22:5) levels | TRUE | PCOS | 1.70096888821025e-6 | 0.59971 | 0.00335480017994657 | 22.8995289680793 |
| rs628035 | T | G | -0.0971671 | 0.0206986 | GCST90277306 | 0.213535 | PC (18:0_22:5) levels | TRUE | PCOS | 2.67416144349056e-6 | 0.15462 | 0.00322793119470475 | 22.0307295968843 |
| rs7968201 | T | G | 0.0999887 | 0.0210104 | GCST90277306 | 0.215059 | PC (18:0_22:5) levels | TRUE | PCOS | 1.94544968213256e-6 | 0.678943 | 0.00331712676507165 | 22.6415181687017 |
| rs9374192 | C | T | -0.101613 | 0.0194073 | GCST90277306 | 0.271727 | PC (18:0_22:5) levels | TRUE | PCOS | 1.64259906308749e-7 | 0.124983 | 0.00401230695970107 | 27.4056842645565 |
| rs9918362 | C | T | 0.0818121 | 0.0172794 | GCST90277306 | 0.458079 | PC (18:0_22:5) levels | TRUE | PCOS | 2.1942161557541e-6 | 0.353274 | 0.00328338140696062 | 22.4104256865745 |
| rs115294982 | C | A | -0.222725 | 0.045635 | GCST90277318 | 0.0372542 | PC (O-16:0_16:0) levels | TRUE | PCOS | 1.05777448116193e-6 | 0.460976 | 0.00359340029365336 | 23.8127910292704 |
| rs148625143 | G | C | -0.205994 | 0.044391 | GCST90277318 | 0.0429598 | PC (O-16:0_16:0) levels | TRUE | PCOS | 3.47659473089532e-6 | 0.179021 | 0.00324962218974105 | 21.5272106201747 |
| rs34115485 | G | A | 0.0860053 | 0.0185818 | GCST90277318 | 0.338209 | PC (O-16:0_16:0) levels | TRUE | PCOS | 3.68377583215577e-6 | 0.197444 | 0.00323292574128345 | 21.4162458020297 |
| rs6675844 | A | T | -0.148802 | 0.0320492 | GCST90277318 | 0.0812781 | PC (O-16:0_16:0) levels | TRUE | PCOS | 3.43512726862526e-6 | 0.159306 | 0.0032530836368179 | 21.5502159086509 |
| rs72739734 | A | G | -0.292323 | 0.0640059 | GCST90277318 | 0.0189468 | PC (O-16:0_16:0) levels | TRUE | PCOS | 4.94457187435889e-6 | 0.742915 | 0.00314806572320933 | 20.8523224519114 |
| rs75248478 | A | G | 0.238275 | 0.048202 | GCST90277318 | 0.0355713 | PC (O-16:0_16:0) levels | TRUE | PCOS | 7.6827065019675e-7 | 0.292873 | 0.00368595704198973 | 24.4284164418668 |
| rs76494046 | C | A | -0.188553 | 0.0412609 | GCST90277318 | 0.0480177 | PC (O-16:0_16:0) levels | TRUE | PCOS | 4.88249767801243e-6 | 0.8389 | 0.00315170635741378 | 20.8765137190121 |
| rs10468017 | T | C | 0.0866592 | 0.0179595 | GCST90277333 | 0.337526 | PC (O-17:0_17:1) levels | TRUE | PCOS | 1.3982297005574e-6 | 0.93333 | 0.00337275802048205 | 23.276335110808 |
| rs11068152 | A | G | -0.0942695 | 0.0206142 | GCST90277333 | 0.223299 | PC (O-17:0_17:1) levels | TRUE | PCOS | 4.80705136207973e-6 | 0.0720792 | 0.00303042057039048 | 20.9065884388074 |
| rs11691441 | C | G | -0.182886 | 0.0399102 | GCST90277333 | 0.0473013 | PC (O-17:0_17:1) levels | TRUE | PCOS | 4.59586935139712e-6 | 0.941115 | 0.00304285436261701 | 20.9926298213144 |
| rs12186559 | T | C | 0.226978 | 0.046698 | GCST90277333 | 0.0360195 | PC (O-17:0_17:1) levels | TRUE | PCOS | 1.17059615474409e-6 | 0.564893 | 0.0034221085263846 | 23.6180860982871 |
| rs174601 | T | C | 0.0891458 | 0.0172886 | GCST90277333 | 0.419025 | PC (O-17:0_17:1) levels | TRUE | PCOS | 2.51831220004445e-7 | 0.472279 | 0.00384962640692895 | 26.5800537034919 |
| rs17513056 | C | T | 0.104123 | 0.0210912 | GCST90277333 | 0.212316 | PC (O-17:0_17:1) levels | TRUE | PCOS | 7.94155351646121e-7 | 0.0617675 | 0.00352993398852295 | 24.3648924349938 |
| rs247617 | A | C | 0.119812 | 0.0189404 | GCST90277333 | 0.278171 | PC (O-17:0_17:1) levels | TRUE | PCOS | 2.5202581544174e-10 | 0.102622 | 0.00578249557925132 | 40.0033236361721 |
| rs38820 | C | G | 0.139793 | 0.0305885 | GCST90277333 | 0.914388 | PC (O-17:0_17:1) levels | TRUE | PCOS | 4.87453814097316e-6 | 0.533729 | 0.00302656244138304 | 20.8798907650021 |
| rs4896718 | C | T | 0.0972284 | 0.0208808 | GCST90277333 | 0.782209 | PC (O-17:0_17:1) levels | TRUE | PCOS | 3.21858080082401e-6 | 0.239977 | 0.00314150017890996 | 21.6753312876608 |
| rs612577 | C | T | -0.114484 | 0.0219999 | GCST90277333 | 0.179796 | PC (O-17:0_17:1) levels | TRUE | PCOS | 1.95210166533567e-7 | 0.0680268 | 0.00392061044154851 | 27.0720977661472 |
| rs62072490 | T | G | -0.107909 | 0.0219168 | GCST90277333 | 0.193801 | PC (O-17:0_17:1) levels | TRUE | PCOS | 8.4977456339077e-7 | 0.556788 | 0.00351111510647567 | 24.2345399616977 |
| rs7223101 | A | C | 0.0815827 | 0.0177503 | GCST90277333 | 0.381992 | PC (O-17:0_17:1) levels | TRUE | PCOS | 4.30408631747659e-6 | 0.398272 | 0.0030610110428091 | 21.118277232254002 |
| rs72495602 | A | G | 0.122016 | 0.0259244 | GCST90277333 | 0.125298 | PC (O-17:0_17:1) levels | TRUE | PCOS | 2.51872022892959e-6 | 0.167948 | 0.00320945736076559 | 22.1457234825864 |
| rs7575011 | G | T | -0.0824257 | 0.0179794 | GCST90277333 | 0.662277 | PC (O-17:0_17:1) levels | TRUE | PCOS | 4.5517818364345e-6 | 0.894751 | 0.00304552233643223 | 21.0110923811405 |
| rs79648513 | G | A | 0.096794 | 0.0206069 | GCST90277333 | 0.229287 | PC (O-17:0_17:1) levels | TRUE | PCOS | 2.63797937323707e-6 | 0.365082 | 0.00319663173176206 | 22.0569409684648 |
| rs10466588 | G | A | 0.151271 | 0.0284692 | GCST90277359 | 0.095834 | PI (16:0_18:2) levels | TRUE | PCOS | 1.07541389502866e-7 | 0.198782 | 0.00401826214617682 | 28.2251781395402 |
| rs115506950 | A | T | 0.222176 | 0.046089 | GCST90277359 | 0.0363184 | PI (16:0_18:2) levels | TRUE | PCOS | 1.43136948924197e-6 | 0.0886401 | 0.00330968010054186 | 23.2314105204981 |
| rs11669648 | A | G | 0.107208 | 0.0228655 | GCST90277359 | 0.17249 | PI (16:0_18:2) levels | TRUE | PCOS | 2.75032483933471e-6 | 0.80755999999999994 | 0.00313153236086956 | 21.9770221527102 |
| rs117113213 | A | G | 0.167474 | 0.0343671 | GCST90277359 | 0.0713596 | PI (16:0_18:2) levels | TRUE | PCOS | 1.09865677122298e-6 | 0.0140815 | 0.00338192393257758 | 23.7402274757779 |
| rs141824100 | T | C | -0.18464 | 0.0387491 | GCST90277359 | 0.0505242 | PI (16:0_18:2) levels | TRUE | PCOS | 1.88840633685218e-6 | 0.503592 | 0.00323405644925226 | 22.6988683405162 |
| rs17427389 | A | G | 0.108031 | 0.0214663 | GCST90277359 | 0.191169 | PI (16:0_18:2) levels | TRUE | PCOS | 4.83907506277409e-7 | 0.929777 | 0.00360611455671499 | 25.3196831166364 |
| rs174549 | A | G | 0.164055 | 0.017408 | GCST90277359 | 0.382044 | PI (16:0_18:2) levels | TRUE | PCOS | 4.3374638254862995e-21 | 0.813545 | 0.0125322818887872 | 88.7885674497373 |
| rs1748199 | C | T | -0.113473 | 0.0191401 | GCST90277359 | 0.262098 | PI (16:0_18:2) levels | TRUE | PCOS | 3.0562523172603903e-9 | 0.655226 | 0.00499743244559155 | 35.1376353483095 |
| rs2264782 | T | C | 0.0846261 | 0.0176457 | GCST90277359 | 0.358586 | PI (16:0_18:2) levels | TRUE | PCOS | 1.6198785469823e-6 | 0.0349269 | 0.00327590944328377 | 22.9935873752307 |
| rs2274890 | A | G | 0.102444 | 0.0190929 | GCST90277359 | 0.264937 | PI (16:0_18:2) levels | TRUE | PCOS | 8.07008021058153e-8 | 0.805691 | 0.00409706010620937 | 28.7809497842205 |
| rs28675901 | C | T | 0.124254 | 0.0254862 | GCST90277359 | 0.128185 | PI (16:0_18:2) levels | TRUE | PCOS | 1.08618837898839e-6 | 0.632852 | 0.0033850418808944 | 23.7621890036964 |
| rs34777947 | C | T | 0.102718 | 0.021588 | GCST90277359 | 0.189345 | PI (16:0_18:2) levels | TRUE | PCOS | 1.95417534262695e-6 | 0.575437 | 0.00322471704233874 | 22.6331057901644 |
| rs3786247 | G | T | 0.158169 | 0.029029 | GCST90277359 | 0.0963705 | PI (16:0_18:2) levels | TRUE | PCOS | 5.07522095832184e-8 | 0.973116 | 0.00422441060821444 | 29.6793543946178 |
| rs4665972 | C | T | -0.0890109 | 0.0173971 | GCST90277359 | 0.620291 | PI (16:0_18:2) levels | TRUE | PCOS | 3.11386457890426e-7 | 0.00309279 | 0.00372680929936309 | 26.1702895367568 |
| rs57107736 | T | C | 0.115248 | 0.0246331 | GCST90277359 | 0.141101 | PI (16:0_18:2) levels | TRUE | PCOS | 2.88864403507532e-6 | 0.890954 | 0.00311816003895125 | 21.8828819605694 |
| rs641738 | C | T | -0.242422 | 0.0170676 | GCST90277359 | 0.592842 | PI (16:0_18:2) levels | TRUE | PCOS | 8.6978140420433e-46 | 0.0898939 | 0.0280209034991916 | 201.685655160776 |
| rs7241918 | T | G | 0.101642 | 0.0218706 | GCST90277359 | 0.82082 | PI (16:0_18:2) levels | TRUE | PCOS | 3.36102238385649e-6 | 0.19049 | 0.00307689539527569 | 21.592397734511 |
| rs73127058 | A | G | -0.313408 | 0.0682557 | GCST90277359 | 0.0164731 | PI (16:0_18:2) levels | TRUE | PCOS | 4.3970245281075e-6 | 0.314876 | 0.00300373696012192 | 21.0774549033314 |
| rs9344829 | T | C | 0.0858645 | 0.0174709 | GCST90277359 | 0.373208 | PI (16:0_18:2) levels | TRUE | PCOS | 8.8911556501377e-7 | 0.0238688 | 0.00343974587767759 | 24.1475235046637 |
| rs10889352 | C | T | -0.159957 | 0.0188116 | GCST90277361 | 0.262366 | PI (18:0_18:1) levels | TRUE | PCOS | 1.84586655598011e-17 | 0.641149 | 0.00999443729788992 | 72.2825949155036 |
| rs11783515 | G | A | -0.0880613 | 0.0171763 | GCST90277361 | 0.625763 | PI (18:0_18:1) levels | TRUE | PCOS | 2.94540253149102e-7 | 0.363863 | 0.00365666902256357 | 26.2778395634668 |
| rs12122878 | T | C | -0.0856276 | 0.0185508 | GCST90277361 | 0.289378 | PI (18:0_18:1) levels | TRUE | PCOS | 3.91500842927324e-6 | 0.839499 | 0.00296604604390596 | 21.3000666527971 |
| rs12638256 | G | A | 0.1603 | 0.0174368 | GCST90277361 | 0.631798 | PI (18:0_18:1) levels | TRUE | PCOS | 3.8132305836486897e-20 | 0.971198 | 0.0116628390021942 | 84.4913361057929 |
| rs1340414 | G | A | 0.0829918 | 0.0175313 | GCST90277361 | 0.645799 | PI (18:0_18:1) levels | TRUE | PCOS | 2.20222804423496e-6 | 0.184034 | 0.00311925597354116 | 22.4037558197251 |
| rs1540037 | G | A | 0.146252 | 0.019725 | GCST90277361 | 0.756927 | PI (18:0_18:1) levels | TRUE | PCOS | 1.22038403968695e-13 | 0.499115 | 0.00761753344475621 | 54.9602006308908 |
| rs1560063 | G | A | 0.0822785 | 0.0179261 | GCST90277361 | 0.328158 | PI (18:0_18:1) levels | TRUE | PCOS | 4.43518431049698e-6 | 0.433575 | 0.00293285903077492 | 21.0610397208914 |
| rs174556 | T | C | 0.135058 | 0.0172686 | GCST90277361 | 0.3796 | PI (18:0_18:1) levels | TRUE | PCOS | 5.239860872211981e-15 | 0.756603 | 0.00846834679631459 | 61.1512127380938 |
| rs2264782 | T | C | 0.0938268 | 0.0174242 | GCST90277361 | 0.358586 | PI (18:0_18:1) levels | TRUE | PCOS | 7.2502852659049e-8 | 0.0349269 | 0.00403235748563713 | 28.9885718819881 |
| rs4804576 | T | G | -0.167212 | 0.0346258 | GCST90277361 | 0.0624361 | PI (18:0_18:1) levels | TRUE | PCOS | 1.37140599959697e-6 | 0.814028 | 0.00324555605542652 | 23.3138477566156 |
| rs4846841 | G | A | 0.0909028 | 0.019046 | GCST90277361 | 0.747162 | PI (18:0_18:1) levels | TRUE | PCOS | 1.81679762952482e-6 | 0.0456405 | 0.00317054198245679 | 22.7732842481779 |
| rs641738 | C | T | -0.22493 | 0.0169221 | GCST90277361 | 0.592842 | PI (18:0_18:1) levels | TRUE | PCOS | 2.5730529665843797e-40 | 0.0898939 | 0.0240751126942328 | 176.630198832812 |
| rs67835422 | T | C | -0.0883283 | 0.0184497 | GCST90277361 | 0.276912 | PI (18:0_18:1) levels | TRUE | PCOS | 1.6885526808654e-6 | 0.823684 | 0.00319006232983642 | 22.9139431886228 |
| rs7122803 | G | C | -0.116087 | 0.0238705 | GCST90277361 | 0.860427 | PI (18:0_18:1) levels | TRUE | PCOS | 1.15503414864386e-6 | 0.247243 | 0.00329138011921374 | 23.6441033853897 |
| rs7742350 | T | C | -0.190062 | 0.0415468 | GCST90277361 | 0.0441654 | PI (18:0_18:1) levels | TRUE | PCOS | 4.77020511034741e-6 | 0.828907 | 0.00291349283153656 | 20.9215634990809 |
| rs964184 | C | G | -0.195386 | 0.0231395 | GCST90277361 | 0.848991 | PI (18:0_18:1) levels | TRUE | PCOS | 3.07106218514664e-17 | 0.0876536 | 0.00985695036478209 | 71.2783517874926 |
| rs112713750 | T | C | -0.267242 | 0.0582638 | GCST90277362 | 0.0204914 | PI (18:0_18:2) levels | TRUE | PCOS | 4.50180168360142e-6 | 0.400549 | 0.00292563544507139 | 21.0324882634333 |
| rs114488287 | A | T | -0.263131 | 0.0570882 | GCST90277362 | 0.0219914 | PI (18:0_18:2) levels | TRUE | PCOS | 4.04219009722703e-6 | 0.379023 | 0.00295425013215421 | 21.2388097036552 |
| rs11669648 | A | G | 0.11275 | 0.022528 | GCST90277362 | 0.17249 | PI (18:0_18:2) levels | TRUE | PCOS | 5.58960252372982e-7 | 0.80755999999999994 | 0.00348140123607507 | 25.0418648393916 |
| rs117113213 | A | G | 0.174181 | 0.0339012 | GCST90277362 | 0.0713596 | PI (18:0_18:2) levels | TRUE | PCOS | 2.77824578500633e-7 | 0.0140815 | 0.00366822732077967 | 26.3906603767561 |
| rs149615216 | T | C | 0.641732 | 0.115532 | GCST90277362 | 0.0049109 | PI (18:0_18:2) levels | TRUE | PCOS | 2.78276412479873e-8 | 0.570197 | 0.00428468442020022 | 30.8447780640106 |
| rs150684478 | T | G | 0.308147 | 0.0572203 | GCST90277362 | 0.0240203 | PI (18:0_18:2) levels | TRUE | PCOS | 7.23343280607304e-8 | 0.0449355 | 0.00402850013446295 | 28.993087621211 |
| rs1540037 | G | A | 0.154677 | 0.0196571 | GCST90277362 | 0.756927 | PI (18:0_18:2) levels | TRUE | PCOS | 3.581738546712611e-15 | 0.499115 | 0.00856168273327499 | 61.900110943165 |
| rs174566 | G | A | 0.29178 | 0.0166784 | GCST90277362 | 0.408433 | PI (18:0_18:2) levels | TRUE | PCOS | 1.57835801746622e-68 | 0.82068700000000006 | 0.0409382870840136 | 305.971594805928 |
| rs1748199 | C | T | -0.187301 | 0.0187142 | GCST90277362 | 0.262098 | PI (18:0_18:2) levels | TRUE | PCOS | 1.39862243001903e-23 | 0.655226 | 0.0137782193091289 | 100.142055206539 |
| rs2081687 | C | T | -0.0798477 | 0.0169954 | GCST90277362 | 0.617597 | PI (18:0_18:2) levels | TRUE | PCOS | 2.62471027690848e-6 | 0.473383 | 0.00306907818179731 | 22.0668773790275 |
| rs34777947 | C | T | 0.101967 | 0.0213088 | GCST90277362 | 0.189345 | PI (18:0_18:2) levels | TRUE | PCOS | 1.70811953937816e-6 | 0.575437 | 0.00318344524081358 | 22.8918103107391 |
| rs41429348 | T | C | 0.182764 | 0.0386424 | GCST90277362 | 0.0485521 | PI (18:0_18:2) levels | TRUE | PCOS | 2.24936679580442e-6 | 0.0111125 | 0.00311014863583162 | 22.3630979803175 |
| rs6115094 | G | A | 0.0791127 | 0.0167188 | GCST90277362 | 0.502471 | PI (18:0_18:2) levels | TRUE | PCOS | 2.22361769145984e-6 | 0.130813 | 0.00311321340715977 | 22.3852036185485 |
| rs62039480 | A | G | 0.0853529 | 0.0177255 | GCST90277362 | 0.332015 | PI (18:0_18:2) levels | TRUE | PCOS | 1.47007985462408e-6 | 0.970498 | 0.00322342996855792 | 23.1802659786579 |
| rs72830461 | C | T | 0.637637 | 0.132634 | GCST90277362 | 0.00455983 | PI (18:0_18:2) levels | TRUE | PCOS | 1.52834921776953e-6 | 0.0374343 | 0.00321307204186552 | 23.1055401611962 |
| rs7561644 | T | G | 0.0861567 | 0.0169192 | GCST90277362 | 0.461745 | PI (18:0_18:2) levels | TRUE | PCOS | 3.53849726521708e-7 | 0.277781 | 0.00360355766716291 | 25.9237189744956 |
| rs77470505 | G | T | 0.311226 | 0.0632179 | GCST90277362 | 0.017935 | PI (18:0_18:2) levels | TRUE | PCOS | 8.51979721952148e-7 | 0.715919 | 0.0033688905022662 | 24.2298347805077 |
| rs780093 | C | T | -0.0909477 | 0.0173054 | GCST90277362 | 0.645899 | PI (18:0_18:2) levels | TRUE | PCOS | 1.47661318465473e-7 | 0.0086904 | 0.00383734861875016 | 27.6120720457267 |
| rs7979473 | G | A | -0.109721 | 0.0168223 | GCST90277362 | 0.576548 | PI (18:0_18:2) levels | TRUE | PCOS | 6.921230510229689e-11 | 0.0152996 | 0.00589821318459918 | 42.5292386231851 |
| rs8033940 | A | G | 0.0911515 | 0.0179889 | GCST90277362 | 0.336674 | PI (18:0_18:2) levels | TRUE | PCOS | 4.03928620038229e-7 | 0.860526 | 0.00356818083591938 | 25.6683094015672 |
| rs8736 | C | T | -0.368933 | 0.0165032 | GCST90277362 | 0.594967 | PI (18:0_18:2) levels | TRUE | PCOS | 1.0737261202501301e-110 | 0.081726 | 0.0651594019963642 | 499.617362047987 |
| rs915894 | G | T | -0.0864759 | 0.0177112 | GCST90277362 | 0.326313 | PI (18:0_18:2) levels | TRUE | PCOS | 1.04720260552077e-6 | 0.366601 | 0.00331385477633568 | 23.8326891074056 |
| rs964184 | C | G | -0.238735 | 0.0230417 | GCST90277362 | 0.848991 | PI (18:0_18:2) levels | TRUE | PCOS | 3.73050408121367e-25 | 0.0876536 | 0.0147512856580255 | 107.320328418136 |
| rs10468017 | T | C | 0.0885897 | 0.017551 | GCST90277365 | 0.337526 | PI (18:1_18:1) levels | TRUE | PCOS | 4.47491670524026e-7 | 0.93333 | 0.00354376879560767 | 25.4707345082938 |
| rs10889352 | C | T | -0.154372 | 0.0188064 | GCST90277365 | 0.262366 | PI (18:1_18:1) levels | TRUE | PCOS | 2.24001973265401e-16 | 0.641149 | 0.00931761129604226 | 67.3603698452301 |
| rs116845732 | C | T | 0.714766 | 0.139135 | GCST90277365 | 0.00357409 | PI (18:1_18:1) levels | TRUE | PCOS | 2.78844243046615e-7 | 0.529887 | 0.00367030776817731 | 26.3835800946596 |
| rs11783515 | G | A | -0.0887851 | 0.0171691 | GCST90277365 | 0.625763 | PI (18:1_18:1) levels | TRUE | PCOS | 2.32577324177166e-7 | 0.363863 | 0.00371887380918541 | 26.7339945736206 |
| rs12428337 | A | G | 0.0894459 | 0.0194989 | GCST90277365 | 0.238142 | PI (18:1_18:1) levels | TRUE | PCOS | 4.49170065391369e-6 | 0.949426 | 0.00292867581927235 | 21.0367861445253 |
| rs1540037 | G | A | 0.164745 | 0.0197139 | GCST90277365 | 0.756927 | PI (18:1_18:1) levels | TRUE | PCOS | 6.444572711059421e-17 | 0.499115 | 0.00965407632446127 | 69.8165085379242 |
| rs174568 | T | C | 0.156754 | 0.0169763 | GCST90277365 | 0.40512 | PI (18:1_18:1) levels | TRUE | PCOS | 2.61450139893627e-20 | 0.885989 | 0.0117613570876418 | 85.2373463290695 |
| rs186422572 | A | G | 0.347295 | 0.0753277 | GCST90277365 | 0.013181 | PI (18:1_18:1) levels | TRUE | PCOS | 4.017878677554e-6 | 0.442629 | 0.00295832159079454 | 21.2503646458145 |
| rs36634 | A | G | -0.121793 | 0.0168952 | GCST90277365 | 0.592939 | PI (18:1_18:1) levels | TRUE | PCOS | 5.64745233936768e-13 | 0.114243 | 0.00720150908760428 | 51.9513361044915 |
| rs41418546 | G | T | 0.148185 | 0.0323613 | GCST90277365 | 0.0762262 | PI (18:1_18:1) levels | TRUE | PCOS | 4.67024292132932e-6 | 0.0365435 | 0.00291831208074046 | 20.9621251453127 |
| rs4804576 | T | G | -0.177789 | 0.0345158 | GCST90277365 | 0.0624361 | PI (18:1_18:1) levels | TRUE | PCOS | 2.59176690241772e-7 | 0.814028 | 0.00368988515255254 | 26.5248310428202 |
| rs62409317 | A | G | 0.194554 | 0.0419832 | GCST90277365 | 0.0462257 | PI (18:1_18:1) levels | TRUE | PCOS | 3.58508007187271e-6 | 0.278174 | 0.00298864121845927 | 21.4688109800115 |
| rs627108 | T | C | -0.0845578 | 0.0170173 | GCST90277365 | 0.395819 | PI (18:1_18:1) levels | TRUE | PCOS | 6.73228050683444e-7 | 0.3882 | 0.00343460080270525 | 24.683388535051 |
| rs72846591 | C | T | 0.0799913 | 0.0171137 | GCST90277365 | 0.397637 | PI (18:1_18:1) levels | TRUE | PCOS | 2.95232443710439e-6 | 0.253162 | 0.00304032280209555 | 21.8411961954263 |
| rs964184 | C | G | -0.166287 | 0.023159 | GCST90277365 | 0.848991 | PI (18:1_18:1) levels | TRUE | PCOS | 6.95930660190971e-13 | 0.0876536 | 0.00714508180246397 | 51.5413429810554 |
| rs9652580 | T | C | -0.0804729 | 0.0172883 | GCST90277365 | 0.423379 | PI (18:1_18:1) levels | TRUE | PCOS | 3.24357145251282e-6 | 0.275994 | 0.00301528001543797 | 21.6607486932208 |
| rs10861498 | A | G | -0.0952476 | 0.019381 | GCST90277382 | 0.242284 | TAG (48:1) levels | TRUE | PCOS | 8.90169319197988e-7 | 0.100078 | 0.0034291671089565 | 24.1452637478289 |
| rs117730598 | C | T | 0.257145 | 0.0508655 | GCST90277382 | 0.0298946 | TAG (48:1) levels | TRUE | PCOS | 4.29509482330635e-7 | 0.542221 | 0.00362790450021389 | 25.549697741416 |
| rs1260326 | C | T | -0.118511 | 0.0176221 | GCST90277382 | 0.650878 | TAG (48:1) levels | TRUE | PCOS | 1.7542981782908197e-11 | 0.0210349 | 0.00640231929427481 | 45.2145524897132 |
| rs16923137 | T | A | 0.172476 | 0.0377837 | GCST90277382 | 0.0520786 | TAG (48:1) levels | TRUE | PCOS | 4.99909816990951e-6 | 0.919918 | 0.002959959248927 | 20.8316950180603 |
| rs16970164 | C | A | -0.202438 | 0.0425919 | GCST90277382 | 0.0394287 | TAG (48:1) levels | TRUE | PCOS | 2.0045063430987e-6 | 0.918796 | 0.0032081840031311 | 22.5842816811827 |
| rs1884216 | A | C | -0.084928 | 0.0174638 | GCST90277382 | 0.622644 | TAG (48:1) levels | TRUE | PCOS | 1.15568308427603e-6 | 0.046808 | 0.00335805815376509 | 23.6428882586652 |
| rs3127050 | A | G | 0.0882816 | 0.018625 | GCST90277382 | 0.718209 | TAG (48:1) levels | TRUE | PCOS | 2.13769194078435e-6 | 0.833127 | 0.00319069044214645 | 22.4607401013064 |
| rs72753379 | T | C | 0.207037 | 0.0452777 | GCST90277382 | 0.039167 | TAG (48:1) levels | TRUE | PCOS | 4.81699598322799e-6 | 0.556589 | 0.00297002557770631 | 20.9027511844273 |
| rs75178403 | C | T | -0.413875 | 0.0898744 | GCST90277382 | 0.00963412 | TAG (48:1) levels | TRUE | PCOS | 4.12391150589665e-6 | 0.0490682 | 0.00301218047741356 | 21.2003296290343 |
| rs79152531 | C | T | -0.188193 | 0.0360273 | GCST90277382 | 0.0602798 | TAG (48:1) levels | TRUE | PCOS | 1.75456689298192e-7 | 0.0442884 | 0.00387242681061864 | 27.2784527418608 |
| rs964184 | C | G | -0.129412 | 0.0234392 | GCST90277382 | 0.848991 | TAG (48:1) levels | TRUE | PCOS | 3.36734063045073e-8 | 0.0876536 | 0.00432420461445003 | 30.4747227161893 |
| rs10084264 | T | G | 0.172089 | 0.0363614 | GCST90277383 | 0.0591184 | TAG (48:2) levels | TRUE | PCOS | 2.21510720210031e-6 | 0.669789 | 0.00315769843146458 | 22.3924789075461 |
| rs10502551 | G | C | -0.185077 | 0.0389123 | GCST90277383 | 0.0508576 | TAG (48:2) levels | TRUE | PCOS | 1.97212845772027e-6 | 0.363695 | 0.00318906269038489 | 22.6156067460249 |
| rs113777805 | C | G | 0.238051 | 0.0497862 | GCST90277383 | 0.0306595 | TAG (48:2) levels | TRUE | PCOS | 1.74021831531456e-6 | 0.098762 | 0.00322284412126404 | 22.8559462452078 |
| rs117591451 | A | G | -0.360375 | 0.0775527 | GCST90277383 | 0.0131306 | TAG (48:2) levels | TRUE | PCOS | 3.37058145971223e-6 | 0.191931 | 0.0030444610302568 | 21.5870158514044 |
| rs117730598 | C | T | 0.236265 | 0.050519 | GCST90277383 | 0.0298946 | TAG (48:2) levels | TRUE | PCOS | 2.91449719730448e-6 | 0.542221 | 0.00308366481555077 | 21.8658535443652 |
| rs1260326 | C | T | -0.137885 | 0.0175462 | GCST90277383 | 0.650878 | TAG (48:2) levels | TRUE | PCOS | 3.8908143043207906e-15 | 0.0210349 | 0.00865786133730059 | 61.7369315864437 |
| rs191616475 | G | A | 0.188678 | 0.0387566 | GCST90277383 | 0.0481341 | TAG (48:2) levels | TRUE | PCOS | 1.1257346831274e-6 | 0.791076 | 0.00334054357509433 | 23.6934515396544 |
| rs2546043 | G | A | -0.0802241 | 0.0167299 | GCST90277383 | 0.532636 | TAG (48:2) levels | TRUE | PCOS | 1.62469800690887e-6 | 0.260797 | 0.00324139660433256 | 22.9879456449811 |
| rs3127050 | A | G | 0.0885169 | 0.0185552 | GCST90277383 | 0.718209 | TAG (48:2) levels | TRUE | PCOS | 1.83802703704343e-6 | 0.833127 | 0.00320807701050995 | 22.7508829719259 |
| rs72738698 | A | G | 0.101596 | 0.0220537 | GCST90277383 | 0.179288 | TAG (48:2) levels | TRUE | PCOS | 4.09000771157278e-6 | 0.752078 | 0.00299231948451812 | 21.2161920609498 |
| rs72753379 | T | C | 0.20845 | 0.0451389 | GCST90277383 | 0.039167 | TAG (48:2) levels | TRUE | PCOS | 3.87515816680881e-6 | 0.556589 | 0.00300685986968857 | 21.3195974608715 |
| rs79152531 | C | T | -0.194281 | 0.0359655 | GCST90277383 | 0.0602798 | TAG (48:2) levels | TRUE | PCOS | 6.59492844168685e-8 | 0.0442884 | 0.00410978482151097 | 29.1719593791312 |
| rs79213832 | G | A | 0.171423 | 0.0357739 | GCST90277383 | 0.0599959 | TAG (48:2) levels | TRUE | PCOS | 1.65254181977258e-6 | 0.25464 | 0.00323680667230599 | 22.9552881965303 |
| rs964184 | C | G | -0.142859 | 0.0233275 | GCST90277383 | 0.848991 | TAG (48:2) levels | TRUE | PCOS | 9.12207568647707e-10 | 0.0876536 | 0.00527594909682496 | 37.4934979521129 |
| rs1042034 | T | C | 0.0898243 | 0.0190429 | GCST90277384 | 0.727594 | TAG (48:3) levels | TRUE | PCOS | 2.39413114674158e-6 | 0.239932 | 0.00323524164855711 | 22.2430727328591 |
| rs10502551 | G | C | -0.199292 | 0.0395816 | GCST90277384 | 0.0508576 | TAG (48:3) levels | TRUE | PCOS | 4.77934299698859e-7 | 0.363695 | 0.00368453302189649 | 25.3434837016453 |
| rs10861498 | A | G | -0.0913929 | 0.0196239 | GCST90277384 | 0.242284 | TAG (48:3) levels | TRUE | PCOS | 3.20501513125489e-6 | 0.100078 | 0.00315409552295284 | 21.6834081593937 |
| rs113777805 | C | G | 0.248823 | 0.0505023 | GCST90277384 | 0.0306595 | TAG (48:3) levels | TRUE | PCOS | 8.35172535776088e-7 | 0.098762 | 0.00352871074681155 | 24.2678891090009 |
| rs117591451 | A | G | -0.387319 | 0.0778051 | GCST90277384 | 0.0131306 | TAG (48:3) levels | TRUE | PCOS | 6.42224299940273e-7 | 0.191931 | 0.00360202605545317 | 24.7739208664774 |
| rs117730598 | C | T | 0.23774 | 0.0511188 | GCST90277384 | 0.0298946 | TAG (48:3) levels | TRUE | PCOS | 3.30753871311302e-6 | 0.542221 | 0.0031453400171317 | 21.6230269092327 |
| rs1260326 | C | T | -0.14156 | 0.0177822 | GCST90277384 | 0.650878 | TAG (48:3) levels | TRUE | PCOS | 1.7097227076906602e-15 | 0.0210349 | 0.00916022413287896 | 63.3553653290541 |
| rs187429064 | G | A | -0.187731 | 0.038921 | GCST90277384 | 0.0535314 | TAG (48:3) levels | TRUE | PCOS | 1.41141568777805e-6 | 0.250577 | 0.00338240104449472 | 23.2582631314312 |
| rs191616475 | G | A | 0.205107 | 0.0394652 | GCST90277384 | 0.0481341 | TAG (48:3) levels | TRUE | PCOS | 2.0235505105117e-7 | 0.791076 | 0.00392479537418383 | 27.002602388226 |
| rs2546043 | G | A | -0.0824055 | 0.0169816 | GCST90277384 | 0.532636 | TAG (48:3) levels | TRUE | PCOS | 1.21832031189642e-6 | 0.260797 | 0.00342340600145673 | 23.5411923872831 |
| rs56082136 | T | C | 0.189163 | 0.0392686 | GCST90277384 | 0.0526001 | TAG (48:3) levels | TRUE | PCOS | 1.45618321518062e-6 | 0.239026 | 0.0033736997919048 | 23.1982285326969 |
| rs72738698 | A | G | 0.108755 | 0.0224186 | GCST90277384 | 0.179288 | TAG (48:3) levels | TRUE | PCOS | 1.22775041659499e-6 | 0.752078 | 0.0034212566101081 | 23.526361268071 |
| rs72846885 | G | A | 0.139625 | 0.0305432 | GCST90277384 | 0.0864889 | TAG (48:3) levels | TRUE | PCOS | 4.84490443846284e-6 | 0.0261024 | 0.00303926030078036 | 20.8915456866753 |
| rs79152531 | C | T | -0.173647 | 0.0367031 | GCST90277384 | 0.0602798 | TAG (48:3) levels | TRUE | PCOS | 2.23277594534735e-6 | 0.0442884 | 0.00325466152161477 | 22.3770250500246 |
| rs964184 | C | G | -0.162636 | 0.0236517 | GCST90277384 | 0.848991 | TAG (48:3) levels | TRUE | PCOS | 6.143043808243589e-12 | 0.0876536 | 0.0068503988588863 | 47.2695989869077 |
| rs9796793 | A | G | -0.125684 | 0.0263038 | GCST90277384 | 0.124802 | TAG (48:3) levels | TRUE | PCOS | 1.76898730971215e-6 | 0.990389 | 0.00331949108621643 | 22.8242372659953 |
| rs9837572 | T | G | -0.0925442 | 0.0202251 | GCST90277384 | 0.235523 | TAG (48:3) levels | TRUE | PCOS | 4.74606751885234e-6 | 0.161886 | 0.0030449850102758 | 20.9310169081552 |
| rs10861498 | A | G | -0.0999195 | 0.0214243 | GCST90277385 | 0.242284 | TAG (49:1) levels | TRUE | PCOS | 3.10363241043817e-6 | 0.100078 | 0.00370883586996874 | 21.7439550770321 |
| rs117591451 | A | G | -0.407575 | 0.085412 | GCST90277385 | 0.0131306 | TAG (49:1) levels | TRUE | PCOS | 1.82522884365881e-6 | 0.191931 | 0.00388197028090554 | 22.7629535198389 |
| rs117730598 | C | T | 0.279911 | 0.0553124 | GCST90277385 | 0.0298946 | TAG (49:1) levels | TRUE | PCOS | 4.18055383858685e-7 | 0.542221 | 0.00436374878056388 | 25.6003702115663 |
| rs1233660 | A | T | -0.101577 | 0.0221157 | GCST90277385 | 0.220513 | TAG (49:1) levels | TRUE | PCOS | 4.36957903241312e-6 | 0.206155 | 0.00359739685984817 | 21.0882578910903 |
| rs1260326 | C | T | -0.0944385 | 0.0193049 | GCST90277385 | 0.650878 | TAG (49:1) levels | TRUE | PCOS | 9.98445860924683e-7 | 0.0210349 | 0.00407898453407469 | 23.9229299247029 |
| rs146238333 | T | A | 0.627341 | 0.133669 | GCST90277385 | 0.00520604 | TAG (49:1) levels | TRUE | PCOS | 2.68908722588704e-6 | 0.209532 | 0.00375557089969763 | 22.0189834787275 |
| rs33951980 | T | C | -0.130057 | 0.0284411 | GCST90277385 | 0.121802 | TAG (49:1) levels | TRUE | PCOS | 4.8112523083196e-6 | 0.853525 | 0.00356604907558064 | 20.9038367582143 |
| rs4556833 | C | A | -0.086003 | 0.0186463 | GCST90277385 | 0.441013 | TAG (49:1) levels | TRUE | PCOS | 3.98168750707516e-6 | 0.91151 | 0.00362766888067674 | 21.2663612489408 |
| rs72753379 | T | C | 0.232195 | 0.0496367 | GCST90277385 | 0.039167 | TAG (49:1) levels | TRUE | PCOS | 2.89842593176517e-6 | 0.556589 | 0.00373113187474843 | 21.8751603885967 |
| rs7412 | T | C | 0.199051 | 0.0414798 | GCST90277385 | 0.053066 | TAG (49:1) levels | TRUE | PCOS | 1.59662587494444e-6 | 0.13342 | 0.0039256474243881 | 23.0200753051819 |
| rs964184 | C | G | -0.131343 | 0.0253339 | GCST90277385 | 0.848991 | TAG (49:1) levels | TRUE | PCOS | 2.1662287804375e-7 | 0.0876536 | 0.0045791052525841 | 26.8695924723687 |
| rs1061808 | G | T | 0.0997619 | 0.0169227 | GCST90277387 | 0.584134 | TAG (50:1) levels | TRUE | PCOS | 3.74335127857579e-9 | 0.0300995 | 0.00484174166880136 | 34.7430943445014 |
| rs10861498 | A | G | -0.0894387 | 0.0191891 | GCST90277387 | 0.242284 | TAG (50:1) levels | TRUE | PCOS | 3.14811826244253e-6 | 0.100078 | 0.00303209129035731 | 21.7180149082888 |
| rs112122274 | G | A | -0.240421 | 0.0486357 | GCST90277387 | 0.0359716 | TAG (50:1) levels | TRUE | PCOS | 7.68099766048102e-7 | 0.533758 | 0.00340934238801644 | 24.429402189223 |
| rs117730598 | C | T | 0.235467 | 0.0503679 | GCST90277387 | 0.0298946 | TAG (50:1) levels | TRUE | PCOS | 2.94037025025661e-6 | 0.542221 | 0.00305031719210336 | 21.8489613311882 |
| rs1260326 | C | T | -0.109326 | 0.0174765 | GCST90277387 | 0.650878 | TAG (50:1) levels | TRUE | PCOS | 3.95989547075127e-10 | 0.0210349 | 0.00544859564874957 | 39.1215791938887 |
| rs1399627 | G | A | 0.0833594 | 0.0174285 | GCST90277387 | 0.631639 | TAG (50:1) levels | TRUE | PCOS | 1.72753145498619e-6 | 0.0376695 | 0.00319241851469854 | 22.8700714530013 |
| rs1884216 | A | C | -0.0822943 | 0.0173094 | GCST90277387 | 0.622644 | TAG (50:1) levels | TRUE | PCOS | 1.99122657087995e-6 | 0.046808 | 0.00315444318775564 | 22.5971602620142 |
| rs55857911 | T | C | 0.147724 | 0.0301478 | GCST90277387 | 0.0925141 | TAG (50:1) levels | TRUE | PCOS | 9.58402149871434e-7 | 0.852304 | 0.00335006212148318 | 24.0032058401908 |
| rs61906420 | A | G | 0.675188 | 0.140727 | GCST90277387 | 0.00406477 | TAG (50:1) levels | TRUE | PCOS | 1.6037232944178e-6 | 0.0902277 | 0.00321230363852797 | 23.0129849781068 |
| rs75931581 | C | T | -0.201812 | 0.0414273 | GCST90277387 | 0.0419208 | TAG (50:1) levels | TRUE | PCOS | 1.10768942319809e-6 | 0.821024 | 0.00331130812593383 | 23.7246108238993 |
| rs964184 | C | G | -0.161909 | 0.0231823 | GCST90277387 | 0.848991 | TAG (50:1) levels | TRUE | PCOS | 2.86555857174599e-12 | 0.0876536 | 0.00678254417600417 | 48.7648980360134 |
| rs111430300 | G | A | -0.112376 | 0.0241624 | GCST90277388 | 0.135493 | TAG (50:2) levels | TRUE | PCOS | 3.30549674650882e-6 | 0.950386 | 0.00300689921464636 | 21.6244900311061 |
| rs1260326 | C | T | -0.139121 | 0.0174067 | GCST90277388 | 0.650878 | TAG (50:2) levels | TRUE | PCOS | 1.3235591318682902e-15 | 0.0210349 | 0.0088279780826432 | 63.8603607173139 |
| rs143838492 | A | G | 0.722982 | 0.148483 | GCST90277388 | 0.00332922 | TAG (50:2) levels | TRUE | PCOS | 1.12094584791895e-6 | 0.453644 | 0.00329479159437071 | 23.7017480518913 |
| rs6033833 | G | C | -0.0784126 | 0.0170792 | GCST90277388 | 0.640039 | TAG (50:2) levels | TRUE | PCOS | 4.40880763321883e-6 | 0.70973 | 0.00293036601802968 | 21.0724744122062 |
| rs72753379 | T | C | 0.215516 | 0.0446564 | GCST90277388 | 0.039167 | TAG (50:2) levels | TRUE | PCOS | 1.39236561240299e-6 | 0.556589 | 0.0032370040528889 | 23.2846917006186 |
| rs7910473 | T | C | 0.259939 | 0.0563214 | GCST90277388 | 0.977325 | TAG (50:2) levels | TRUE | PCOS | 3.92566733612081e-6 | 0.443272 | 0.00296120028597576 | 21.294864409024 |
| rs79213832 | G | A | 0.16353 | 0.0355547 | GCST90277388 | 0.0599959 | TAG (50:2) levels | TRUE | PCOS | 4.23725950924663e-6 | 0.25464 | 0.00294090810039089 | 21.1485068950415 |
| rs79934453 | G | A | -0.643126 | 0.136985 | GCST90277388 | 0.00403955 | TAG (50:2) levels | TRUE | PCOS | 2.66783634013257e-6 | 0.66865 | 0.00306388988365506 | 22.0356051334554 |
| rs964184 | C | G | -0.183837 | 0.023117 | GCST90277388 | 0.848991 | TAG (50:2) levels | TRUE | PCOS | 1.8284501598022503e-15 | 0.0876536 | 0.0087407734557217 | 63.2239720945741 |
| rs10105606 | A | C | -0.100976 | 0.0185164 | GCST90277389 | 0.278826 | TAG (50:3) levels | TRUE | PCOS | 4.94358003438407e-8 | 0.777687 | 0.00413570644777269 | 29.7304789932726 |
| rs1042034 | T | C | 0.0985924 | 0.0186359 | GCST90277389 | 0.727594 | TAG (50:3) levels | TRUE | PCOS | 1.22012094277536e-7 | 0.239932 | 0.00389330403869733 | 27.9811025526095 |
| rs111430300 | G | A | -0.110784 | 0.024174 | GCST90277389 | 0.135493 | TAG (50:3) levels | TRUE | PCOS | 4.58845938602489e-6 | 0.950386 | 0.00292423005869077 | 20.9959600075323 |
| rs116011373 | A | G | -0.185556 | 0.0392006 | GCST90277389 | 0.0487529 | TAG (50:3) levels | TRUE | PCOS | 2.20682076298614e-6 | 0.507973 | 0.00311913492382308 | 22.3997547770596 |
| rs1260326 | C | T | -0.159151 | 0.0173975 | GCST90277389 | 0.650878 | TAG (50:3) levels | TRUE | PCOS | 5.803834672651559e-20 | 0.0210349 | 0.0115511593715507 | 83.6611330216695 |
| rs139499638 | C | G | -0.642863 | 0.13608 | GCST90277389 | 0.00441364 | TAG (50:3) levels | TRUE | PCOS | 2.31074233631407e-6 | 0.309828 | 0.00310687076957676 | 22.3114064960708 |
| rs1428264 | C | A | 0.0987249 | 0.0208535 | GCST90277389 | 0.197498 | TAG (50:3) levels | TRUE | PCOS | 2.19907257385447e-6 | 0.980909 | 0.00312007238789159 | 22.406508152311 |
| rs187429064 | G | A | -0.235431 | 0.0378421 | GCST90277389 | 0.0535314 | TAG (50:3) levels | TRUE | PCOS | 4.92724966940601e-10 | 0.250577 | 0.00537603493222717 | 38.6950600744793 |
| rs35368205 | T | C | -0.102843 | 0.0222938 | GCST90277389 | 0.166552 | TAG (50:3) levels | TRUE | PCOS | 3.96752609813876e-6 | 0.538762 | 0.00296291308279213 | 21.2745293410236 |
| rs72738698 | A | G | 0.104261 | 0.0218926 | GCST90277389 | 0.179288 | TAG (50:3) levels | TRUE | PCOS | 1.91317789571232e-6 | 0.752078 | 0.00315719997386487 | 22.6739809048187 |
| rs72753379 | T | C | 0.208129 | 0.0446609 | GCST90277389 | 0.039167 | TAG (50:3) levels | TRUE | PCOS | 3.15892870202486e-6 | 0.556589 | 0.00302358001970662 | 21.7114556846867 |
| rs79213832 | G | A | 0.165926 | 0.0355786 | GCST90277389 | 0.0599959 | TAG (50:3) levels | TRUE | PCOS | 3.10655412345497e-6 | 0.25464 | 0.00302803193749551 | 21.7435207156911 |
| rs79934453 | G | A | -0.636555 | 0.136949 | GCST90277389 | 0.00403955 | TAG (50:3) levels | TRUE | PCOS | 3.34978606554387e-6 | 0.66865 | 0.00300796067172083 | 21.5989592688803 |
| rs79954170 | A | C | -0.440235 | 0.0957242 | GCST90277389 | 0.00813879 | TAG (50:3) levels | TRUE | PCOS | 4.24536464503996e-6 | 0.162278 | 0.00294490390206336 | 21.1448365465259 |
| rs9344829 | T | C | 0.0800971 | 0.017229 | GCST90277389 | 0.373208 | TAG (50:3) levels | TRUE | PCOS | 3.33597111989222e-6 | 0.0238688 | 0.00300906091881901 | 21.6068835466831 |
| rs964184 | C | G | -0.212747 | 0.02309 | GCST90277389 | 0.848991 | TAG (50:3) levels | TRUE | PCOS | 3.14733891670121e-20 | 0.0876536 | 0.011716206655858 | 84.8706859448418 |
| rs10105606 | A | C | -0.0972748 | 0.0185177 | GCST90277390 | 0.278826 | TAG (50:4) levels | TRUE | PCOS | 1.49583525835354e-7 | 0.777687 | 0.00383601800051058 | 27.5870574044424 |
| rs1042034 | T | C | 0.0931538 | 0.0186426 | GCST90277390 | 0.727594 | TAG (50:4) levels | TRUE | PCOS | 5.82820709210466e-7 | 0.239932 | 0.00347216869436272 | 24.9612863233575 |
| rs116497138 | T | G | -0.184148 | 0.0392037 | GCST90277390 | 0.0497938 | TAG (50:4) levels | TRUE | PCOS | 2.63739639414817e-6 | 0.690202 | 0.0030695023951279 | 22.0576210794304 |
| rs117730598 | C | T | 0.236043 | 0.0501857 | GCST90277390 | 0.0298946 | TAG (50:4) levels | TRUE | PCOS | 2.55874970139585e-6 | 0.542221 | 0.00307756224884179 | 22.1157184509132 |
| rs11783556 | G | A | -0.0996214 | 0.0210861 | GCST90277390 | 0.200404 | TAG (50:4) levels | TRUE | PCOS | 2.30675726542208e-6 | 0.569782 | 0.00310516940079714 | 22.3147245872864 |
| rs12120691 | C | T | -0.118487 | 0.02559 | GCST90277390 | 0.12345 | TAG (50:4) levels | TRUE | PCOS | 3.65300160018284e-6 | 0.0609579 | 0.00298281744646469 | 21.4328344189049 |
| rs12335973 | C | T | 0.183535 | 0.0390044 | GCST90277390 | 0.0481454 | TAG (50:4) levels | TRUE | PCOS | 2.53251004769885e-6 | 0.6915 | 0.00308030670001135 | 22.1355013319422 |
| rs1260326 | C | T | -0.168895 | 0.0173839 | GCST90277390 | 0.650878 | TAG (50:4) levels | TRUE | PCOS | 2.58723496591523e-22 | 0.0210349 | 0.0130010681365937 | 94.3665176564212 |
| rs1832326 | C | A | 0.0855578 | 0.0186409 | GCST90277390 | 0.724997 | TAG (50:4) levels | TRUE | PCOS | 4.43694039154877e-6 | 0.922297 | 0.00293112150096281 | 21.0602846861575 |
| rs187429064 | G | A | -0.246624 | 0.0378364 | GCST90277390 | 0.0535314 | TAG (50:4) levels | TRUE | PCOS | 7.117140268705789e-11 | 0.250577 | 0.00589395707138222 | 42.4746522362848 |
| rs191616475 | G | A | 0.185327 | 0.038601 | GCST90277390 | 0.0481341 | TAG (50:4) levels | TRUE | PCOS | 1.57801772215234e-6 | 0.791076 | 0.00320633389236186 | 23.0440629649827 |
| rs2546043 | G | A | -0.0761335 | 0.0166109 | GCST90277390 | 0.532636 | TAG (50:4) levels | TRUE | PCOS | 4.57594197858371e-6 | 0.260797 | 0.00292292177243735 | 21.0011964320396 |
| rs301555 | G | A | 0.0813883 | 0.0177059 | GCST90277390 | 0.339618 | TAG (50:4) levels | TRUE | PCOS | 4.29282695033325e-6 | 0.4692 | 0.0029398994292376 | 21.1235405959998 |
| rs55798552 | T | C | 0.120711 | 0.0252724 | GCST90277390 | 0.120975 | TAG (50:4) levels | TRUE | PCOS | 1.78464442956521e-6 | 0.527433 | 0.00317353635047147 | 22.8075951470436 |
| rs668013 | A | G | 0.077874 | 0.0169376 | GCST90277390 | 0.545213 | TAG (50:4) levels | TRUE | PCOS | 4.27180918291813e-6 | 0.211617 | 0.00294120425939323 | 21.1329436180761 |
| rs72738698 | A | G | 0.105497 | 0.0218727 | GCST90277390 | 0.179288 | TAG (50:4) levels | TRUE | PCOS | 1.41253965897876e-6 | 0.752078 | 0.0032358696913313 | 23.2570271780534 |
| rs79152531 | C | T | -0.176807 | 0.035712 | GCST90277390 | 0.0602798 | TAG (50:4) levels | TRUE | PCOS | 7.38661755702226e-7 | 0.0442884 | 0.00340887265137 | 24.5046970660733 |
| rs79213832 | G | A | 0.168251 | 0.0355805 | GCST90277390 | 0.0599959 | TAG (50:4) levels | TRUE | PCOS | 2.25915388558801e-6 | 0.25464 | 0.00311072296538022 | 22.3547587855236 |
| rs964184 | C | G | -0.202799 | 0.0230975 | GCST90277390 | 0.848991 | TAG (50:4) levels | TRUE | PCOS | 1.63289125709161e-18 | 0.0876536 | 0.0106433353622062 | 77.0691271006497 |
| rs112421492 | T | A | -0.97076 | 0.196679 | GCST90277395 | 0.00236045 | TAG (51:4) levels | TRUE | PCOS | 7.98399487139045e-7 | 0.492795 | 0.00463030504360231 | 24.3524059714516 |
| rs116923150 | A | G | 0.95538 | 0.19217 | GCST90277395 | 0.00322755 | TAG (51:4) levels | TRUE | PCOS | 6.64246571273274e-7 | 0.614417 | 0.00469735835880863 | 24.7067273606496 |
| rs11782705 | C | T | -0.200105 | 0.0420688 | GCST90277395 | 0.059029 | TAG (51:4) levels | TRUE | PCOS | 1.9686808261492e-6 | 0.284856 | 0.00430170695299523 | 22.6167264282604 |
| rs1260326 | C | T | -0.134885 | 0.020271 | GCST90277395 | 0.650878 | TAG (51:4) levels | TRUE | PCOS | 2.85063791657497e-11 | 0.0210349 | 0.00838374439344163 | 44.2599661426695 |
| rs149992851 | G | A | 0.337939 | 0.0694541 | GCST90277395 | 0.0198046 | TAG (51:4) levels | TRUE | PCOS | 1.14084087031045e-6 | 0.612343 | 0.0045002788220761 | 23.6654608056467 |
| rs17514333 | G | A | 0.110439 | 0.0237505 | GCST90277395 | 0.20917 | TAG (51:4) levels | TRUE | PCOS | 3.31990938953858e-6 | 0.376095 | 0.00411175707776266 | 21.6139194885227 |
| rs182295482 | C | T | -0.546713 | 0.119116 | GCST90277395 | 0.00784914 | TAG (51:4) levels | TRUE | PCOS | 4.43771148701983e-6 | 0.0066356 | 0.00400638407037414 | 21.0577861875478 |
| rs2853923 | G | A | 0.0953264 | 0.0194887 | GCST90277395 | 0.505241 | TAG (51:4) levels | TRUE | PCOS | 1.00137632428292e-6 | 0.256008 | 0.00454777001281308 | 23.9163420402232 |
| rs438811 | T | C | 0.114923 | 0.022853 | GCST90277395 | 0.242228 | TAG (51:4) levels | TRUE | PCOS | 4.93577591576726e-7 | 0.40979 | 0.00480565726797503 | 25.2790984811933 |
| rs62002515 | C | T | -0.328213 | 0.0706375 | GCST90277395 | 0.0192936 | TAG (51:4) levels | TRUE | PCOS | 3.3771010810052e-6 | 0.541764 | 0.00410555291415976 | 21.5811721498371 |
| rs62111901 | A | G | -0.125008 | 0.0265564 | GCST90277395 | 0.17131 | TAG (51:4) levels | TRUE | PCOS | 2.51063013022382e-6 | 0.901346 | 0.0042132862349321 | 22.149877212635 |
| rs62291572 | T | C | 0.119119 | 0.0243696 | GCST90277395 | 0.214393 | TAG (51:4) levels | TRUE | PCOS | 1.01857141914024e-6 | 0.591705 | 0.00454156811170279 | 23.8835779608243 |
| rs71605604 | T | C | 0.26171 | 0.0567978 | GCST90277395 | 0.030057 | TAG (51:4) levels | TRUE | PCOS | 4.07051821138549e-6 | 0.2914 | 0.00403773596789558 | 21.2232416380506 |
| rs964184 | C | G | -0.240257 | 0.0262015 | GCST90277395 | 0.848991 | TAG (51:4) levels | TRUE | PCOS | 4.7482359151463e-20 | 0.0876536 | 0.0158015572812616 | 84.0492615888485 |
| rs966039 | G | A | -0.12679 | 0.0266931 | GCST90277395 | 0.164013 | TAG (51:4) levels | TRUE | PCOS | 2.03500511904549e-6 | 0.389862 | 0.00428965556212438 | 22.5530918636773 |
| rs114561185 | G | A | 0.61693 | 0.128814 | GCST90277407 | 0.0046429 | TAG (54:6) levels | TRUE | PCOS | 1.67356926685923e-6 | 0.122109 | 0.00323567207202732 | 22.9309846634606 |
| rs13178172 | G | A | 0.0914375 | 0.0188753 | GCST90277407 | 0.73893 | TAG (54:6) levels | TRUE | PCOS | 1.27062755905801e-6 | 0.663697 | 0.00331014763869425 | 23.4605407733797 |
| rs174554 | G | A | -0.0983213 | 0.0171242 | GCST90277407 | 0.405862 | TAG (54:6) levels | TRUE | PCOS | 9.375402174743981e-9 | 0.906652 | 0.00464386414637378 | 32.9573055797272 |
| rs17596144 | T | C | 0.110068 | 0.0236192 | GCST90277407 | 0.151717 | TAG (54:6) levels | TRUE | PCOS | 3.16044999235588e-6 | 0.512726 | 0.00306397656378999 | 21.7104507589271 |
| rs268 | G | A | 0.293972 | 0.0573851 | GCST90277407 | 0.0226757 | TAG (54:6) levels | TRUE | PCOS | 3.01042464637229e-7 | 0.158606 | 0.00370024125251028 | 26.2355821912403 |
| rs4057791 | C | A | 0.0807562 | 0.0168663 | GCST90277407 | 0.546187 | TAG (54:6) levels | TRUE | PCOS | 1.68433956803042e-6 | 0.81617 | 0.0032339382097937 | 22.9186570346843 |
| rs445925 | A | G | 0.154919 | 0.0313353 | GCST90277407 | 0.0774371 | TAG (54:6) levels | TRUE | PCOS | 7.65698475400365e-7 | 0.0713329 | 0.00344721467791292 | 24.4353584109512 |
| rs56051325 | G | A | 0.0920869 | 0.018643 | GCST90277407 | 0.301685 | TAG (54:6) levels | TRUE | PCOS | 7.83274202524779e-7 | 0.686216 | 0.00344106962037361 | 24.3916491612387 |
| rs964184 | C | G | -0.218451 | 0.0232033 | GCST90277407 | 0.848991 | TAG (54:6) levels | TRUE | PCOS | 4.7465107567681505e-21 | 0.0876536 | 0.0123885660356928 | 88.6105886045228 |

| **Table S8. Results of MR Analysis between lipidomics and PCOS** | | | | | | | | | | |
| --- | --- | --- | --- | --- | --- | --- | --- | --- | --- | --- |
| **id.exposure** | **outcome** | **exposure** | **method** | **nsnp** | **b** | **se** | **pval** | **or** | **or_lci95** | **or_uci95** |
| GCST90277238 | PCOS | CE (27:1/14:0) levels | MR Egger | 10 | -0.374381923 | 0.278157977004217 | 0.215218986818889 | 0.687714207677316 | 0.39868981992318703 | 1.18626262273855 |
| GCST90277238 | PCOS | CE (27:1/14:0) levels | Weighted median | 10 | -0.088791833 | 0.149898491794931 | 0.553618646561193 | 0.915036034117355 | 0.682090537613174 | 1.22753637173026 |
| GCST90277238 | PCOS | CE (27:1/14:0) levels | Inverse variance weighted | 10 | -0.117007855 | 0.110392637401318 | 0.289178972905937 | 0.889578205403188 | 0.716499718630104 | 1.10446572825089 |
| GCST90277238 | PCOS | CE (27:1/14:0) levels | Simple mode | 10 | 0.0025823857478442 | 0.266457079510272 | 0.992478800781214 | 1.00258572297797 | 0.594714696513432 | 1.69018545835879 |
| GCST90277238 | PCOS | CE (27:1/14:0) levels | Weighted mode | 10 | -0.07180242 | 0.214870081001695 | 0.745908850544814 | 0.930714768532179 | 0.610823166346376 | 1.41813544097425 |
| GCST90277239 | PCOS | CE (27:1/15:0) levels | MR Egger | 8 | -0.172663791 | 0.276316083282632 | 0.55505482635195 | 0.841420460166018 | 0.489562416437481 | 1.44616573293756 |
| GCST90277239 | PCOS | CE (27:1/15:0) levels | Weighted median | 8 | 0.0485758403154308 | 0.175526856177956 | 0.78197740105217 | 1.0497749840673 | 0.744191564746392 | 1.48083849559495 |
| GCST90277239 | PCOS | CE (27:1/15:0) levels | Inverse variance weighted | 8 | 0.0336498889675399 | 0.155695265257907 | 0.828889062608178 | 1.03422245064441 | 0.762225503337152 | 1.403280358 |
| GCST90277239 | PCOS | CE (27:1/15:0) levels | Simple mode | 8 | 0.102495594307168 | 0.296775931782386 | 0.739966805743044 | 1.10793242068913 | 0.619287762165704 | 1.98213871451512 |
| GCST90277239 | PCOS | CE (27:1/15:0) levels | Weighted mode | 8 | 0.0683822115513453 | 0.292166894799009 | 0.821642657706673 | 1.07077449265631 | 0.603949374112527 | 1.89843398017953 |
| GCST90277240 | PCOS | CE (27:1/16:0) levels | MR Egger | 25 | -0.067554762 | 0.116876955274112 | 0.568881248509697 | 0.934676534850568 | 0.743316318091903 | 1.17530074819675 |
| GCST90277240 | PCOS | CE (27:1/16:0) levels | Weighted median | 25 | -0.036722551 | 0.0852589049318202 | 0.666673380780595 | 0.963943543729731 | 0.815601008027733 | 1.13926680613744 |
| GCST90277240 | PCOS | CE (27:1/16:0) levels | Inverse variance weighted | 25 | -0.036035306 | 0.0586359473137815 | 0.538845362063014 | 0.964606236888109 | 0.859880577863306 | 1.08208653177808 |
| GCST90277240 | PCOS | CE (27:1/16:0) levels | Simple mode | 25 | 0.0692465095509154 | 0.157309130806532 | 0.663735762895332 | 1.07170036096373 | 0.787352374482555 | 1.45873906133148 |
| GCST90277240 | PCOS | CE (27:1/16:0) levels | Weighted mode | 25 | 0.00773575635406543 | 0.111118640049373 | 0.945075254136019 | 1.00776575462045 | 0.810538223808733 | 1.25298448161204 |
| GCST90277241 | PCOS | CE (27:1/16:1) levels | MR Egger | 15 | 0.194753929151667 | 0.270164448 | 0.483750990724904 | 1.21501197067534 | 0.715503785762914 | 2.06323728575427 |
| GCST90277241 | PCOS | CE (27:1/16:1) levels | Weighted median | 15 | -0.332074716 | 0.124843115323734 | 0.00781554653189022 | 0.717433717100572 | 0.561711322551483 | 0.91632679949329 |
| GCST90277241 | PCOS | CE (27:1/16:1) levels | Inverse variance weighted | 15 | -0.264806012 | 0.094626809350486 | 0.00513525223462243 | 0.767354793172055 | 0.637453109543902 | 0.923728145314781 |
| GCST90277241 | PCOS | CE (27:1/16:1) levels | Simple mode | 15 | -0.488885481 | 0.231359026642104 | 0.0530307041250092 | 0.613309558800148 | 0.389711260074424 | 0.96519822096954 |
| GCST90277241 | PCOS | CE (27:1/16:1) levels | Weighted mode | 15 | -0.453771254 | 0.237558691990708 | 0.0768170638678775 | 0.635228022198865 | 0.398763690961949 | 1.01191419713583 |
| GCST90277242 | PCOS | CE (27:1/17:0) levels | MR Egger | 19 | 0.0978243625837828 | 0.234699840172172 | 0.682035739870282 | 1.10276908058613 | 0.696151949552126 | 1.74688822731755 |
| GCST90277242 | PCOS | CE (27:1/17:0) levels | Weighted median | 19 | -0.116321156 | 0.112107373354024 | 0.29946236053805 | 0.890189287630673 | 0.714586226560972 | 1.108945203 |
| GCST90277242 | PCOS | CE (27:1/17:0) levels | Inverse variance weighted | 19 | -0.076533904 | 0.0819501468790731 | 0.350351311518718 | 0.926321507593423 | 0.788868063471188 | 1.08772502673572 |
| GCST90277242 | PCOS | CE (27:1/17:0) levels | Simple mode | 19 | -0.184414085 | 0.19021016707618 | 0.345130070426364 | 0.831591382947159 | 0.572795790392574 | 1.2073137404135 |
| GCST90277242 | PCOS | CE (27:1/17:0) levels | Weighted mode | 19 | -0.19260094 | 0.196950134540246 | 0.34107645370652 | 0.824811057419358 | 0.56066976336716 | 1.21339391722419 |
| GCST90277243 | PCOS | CE (27:1/17:1) levels | MR Egger | 10 | -0.37447653 | 0.294813544220222 | 0.239703841421492 | 0.687649147980494 | 0.385848267133767 | 1.22551114258177 |
| GCST90277243 | PCOS | CE (27:1/17:1) levels | Weighted median | 10 | -0.346611779 | 0.171416676561717 | 0.0431719769860414 | 0.707079777917059 | 0.505307327521717 | 0.989421259318171 |
| GCST90277243 | PCOS | CE (27:1/17:1) levels | Inverse variance weighted | 10 | -0.24781011 | 0.13630892994372 | 0.0690636001052952 | 0.780508140136161 | 0.597515166410846 | 1.01954392300719 |
| GCST90277243 | PCOS | CE (27:1/17:1) levels | Simple mode | 10 | -0.559826571 | 0.337613580752912 | 0.131655764351571 | 0.571308136849203 | 0.294773153706522 | 1.10726836255606 |
| GCST90277243 | PCOS | CE (27:1/17:1) levels | Weighted mode | 10 | -0.5047071 | 0.309909445642502 | 0.137846300728057 | 0.603682367918763 | 0.328857874563759 | 1.10817599189144 |
| GCST90277244 | PCOS | CE (27:1/18:0) levels | MR Egger | 20 | 0.075388823914995 | 0.205286273136937 | 0.717723912028633 | 1.07830333951009 | 0.721103737922412 | 1.61244219222688 |
| GCST90277244 | PCOS | CE (27:1/18:0) levels | Weighted median | 20 | -0.124374494 | 0.100341544669536 | 0.215156150267434 | 0.883049082585754 | 0.725391390151801 | 1.07497234298902 |
| GCST90277244 | PCOS | CE (27:1/18:0) levels | Inverse variance weighted | 20 | -0.141869813 | 0.074507862371583 | 0.0568982233637457 | 0.867734216611795 | 0.749832655371354 | 1.00417428513564 |
| GCST90277244 | PCOS | CE (27:1/18:0) levels | Simple mode | 20 | -0.062263778 | 0.161175815910818 | 0.703559363456432 | 0.939634999340119 | 0.685115133401494 | 1.28870884460159 |
| GCST90277244 | PCOS | CE (27:1/18:0) levels | Weighted mode | 20 | -0.0941133 | 0.140512114675648 | 0.511051742509062 | 0.910179632833866 | 0.691068004806025 | 1.19876330298076 |
| GCST90277245 | PCOS | CE (27:1/18:1) levels | MR Egger | 21 | -0.181075909 | 0.172660447737175 | 0.307455729948011 | 0.834372020345146 | 0.594823601126686 | 1.17039180526156 |
| GCST90277245 | PCOS | CE (27:1/18:1) levels | Weighted median | 21 | -0.144875509 | 0.107135132927235 | 0.176289306741601 | 0.86512998706017 | 0.701271355018465 | 1.06727572594352 |
| GCST90277245 | PCOS | CE (27:1/18:1) levels | Inverse variance weighted | 21 | -0.145006225 | 0.0794840450149747 | 0.0681001116483686 | 0.865016908169887 | 0.740229538697207 | 1.01084084368844 |
| GCST90277245 | PCOS | CE (27:1/18:1) levels | Simple mode | 21 | -0.109997377 | 0.195297311837832 | 0.579538419283358 | 0.895836485218115 | 0.610925591923117 | 1.31361825213723 |
| GCST90277245 | PCOS | CE (27:1/18:1) levels | Weighted mode | 21 | -0.109997377 | 0.196818819771174 | 0.582450440500836 | 0.895836485218115 | 0.609106430638072 | 1.31754151307721 |
| GCST90277246 | PCOS | CE (27:1/18:2) levels | MR Egger | 18 | -0.144769902 | 0.127820368940302 | 0.274068734258403 | 0.865221355577829 | 0.67347943002332 | 1.11155287121689 |
| GCST90277246 | PCOS | CE (27:1/18:2) levels | Weighted median | 18 | -0.193172767 | 0.0996182884356588 | 0.0524855651996329 | 0.824339543228483 | 0.678124342215891 | 1.00208124119191 |
| GCST90277246 | PCOS | CE (27:1/18:2) levels | Inverse variance weighted | 18 | -0.096296031 | 0.0686074269928512 | 0.16044387544917 | 0.908195122810401 | 0.793924756443494 | 1.03891253472369 |
| GCST90277246 | PCOS | CE (27:1/18:2) levels | Simple mode | 18 | -0.188922414 | 0.16396636324389 | 0.265184001643624 | 0.827850734237114 | 0.600317566990737 | 1.14162382688945 |
| GCST90277246 | PCOS | CE (27:1/18:2) levels | Weighted mode | 18 | -0.193073459 | 0.121584362852707 | 0.130714988929125 | 0.824421410418253 | 0.649612783961699 | 1.04627045331684 |
| GCST90277247 | PCOS | CE (27:1/18:3) levels | MR Egger | 11 | -0.01732549 | 0.242168126467556 | 0.944530031492042 | 0.982823733081237 | 0.611417640035046 | 1.57984072924748 |
| GCST90277247 | PCOS | CE (27:1/18:3) levels | Weighted median | 11 | 0.00457525482632536 | 0.129974051491484 | 0.971919230241214 | 1.00458573728523 | 0.778665372216282 | 1.29605417110625 |
| GCST90277247 | PCOS | CE (27:1/18:3) levels | Inverse variance weighted | 11 | -0.097244435 | 0.09247315448714 | 0.292984764716469 | 0.907334194393255 | 0.756924460703819 | 1.08763209944327 |
| GCST90277247 | PCOS | CE (27:1/18:3) levels | Simple mode | 11 | -0.017056069 | 0.205551054183203 | 0.935507085205526 | 0.983088562205645 | 0.657088783258323 | 1.47082577843916 |
| GCST90277247 | PCOS | CE (27:1/18:3) levels | Weighted mode | 11 | 0.00111796298691003 | 0.169331955202429 | 0.994862100370999 | 1.00111858814047 | 0.71836845774871 | 1.39515929006862 |
| GCST90277248 | PCOS | CE (27:1/20:2) levels | MR Egger | 19 | -0.177428442 | 0.172794720534483 | 0.318896544195058 | 0.837420921334368 | 0.596840068000389 | 1.17497774879291 |
| GCST90277248 | PCOS | CE (27:1/20:2) levels | Weighted median | 19 | -0.107031944 | 0.105332969501335 | 0.309567694423532 | 0.898496971019111 | 0.730895660919824 | 1.10453085179702 |
| GCST90277248 | PCOS | CE (27:1/20:2) levels | Inverse variance weighted | 19 | -0.148360696 | 0.0674490085611345 | 0.0278354383077308 | 0.862120095845453 | 0.755360052654599 | 0.983969243605787 |
| GCST90277248 | PCOS | CE (27:1/20:2) levels | Simple mode | 19 | -0.038092174 | 0.170335347986403 | 0.825563308087628 | 0.962624208045658 | 0.689389086208845 | 1.34415438894083 |
| GCST90277248 | PCOS | CE (27:1/20:2) levels | Weighted mode | 19 | -0.06925499 | 0.126147014455191 | 0.58975011179132 | 0.93308872105585 | 0.728692724370224 | 1.19481714616282 |
| GCST90277249 | PCOS | CE (27:1/20:3) levels | MR Egger | 24 | -0.091154211 | 0.13120970948786 | 0.494502193154601 | 0.91287692478948 | 0.705869261147115 | 1.18059295918173 |
| GCST90277249 | PCOS | CE (27:1/20:3) levels | Weighted median | 24 | -0.014024767 | 0.0943933366929017 | 0.881886687483471 | 0.986073122131382 | 0.819520630457223 | 1.1864743437239 |
| GCST90277249 | PCOS | CE (27:1/20:3) levels | Inverse variance weighted | 24 | -0.030211491 | 0.0631459334624067 | 0.632337628952601 | 0.970240314987441 | 0.857291292406811 | 1.0980704891847 |
| GCST90277249 | PCOS | CE (27:1/20:3) levels | Simple mode | 24 | 0.105189479492677 | 0.168804608374453 | 0.539320910978797 | 1.11092108717856 | 0.797983344805449 | 1.54658072749485 |
| GCST90277249 | PCOS | CE (27:1/20:3) levels | Weighted mode | 24 | 0.0120150580829622 | 0.122642687600825 | 0.922806482367071 | 1.01208752884931 | 0.795834038187874 | 1.2871039901544 |
| GCST90277250 | PCOS | CE (27:1/20:4) levels | MR Egger | 21 | 0.0101443110412679 | 0.0599895644285435 | 0.867504308909136 | 1.01019593899351 | 0.898134688045949 | 1.13623919523612 |
| GCST90277250 | PCOS | CE (27:1/20:4) levels | Weighted median | 21 | 0.00332912742124282 | 0.0455797362705067 | 0.94177457544729 | 1.00333467512056 | 0.917587665243094 | 1.097094598 |
| GCST90277250 | PCOS | CE (27:1/20:4) levels | Inverse variance weighted | 21 | -0.010815817 | 0.0394633428126341 | 0.784028907096053 | 0.989242463635319 | 0.915610732711778 | 1.06879552291937 |
| GCST90277250 | PCOS | CE (27:1/20:4) levels | Simple mode | 21 | -0.007969004 | 0.138397174921779 | 0.954654047279686 | 0.992062664513943 | 0.756367835176061 | 1.30120330948951 |
| GCST90277250 | PCOS | CE (27:1/20:4) levels | Weighted mode | 21 | 0.00768015730369875 | 0.0469103532380232 | 0.87159482692147 | 1.0077097253591 | 0.919188434151224 | 1.10475594867663 |
| GCST90277251 | PCOS | CE (27:1/20:5) levels | MR Egger | 17 | 0.024825578152938 | 0.102788332064297 | 0.81242161252094 | 1.02513629876295 | 0.838081814419775 | 1.25394014398101 |
| GCST90277251 | PCOS | CE (27:1/20:5) levels | Weighted median | 17 | 0.0115069925915627 | 0.0733418752473789 | 0.875327395504609 | 1.01157345270486 | 0.876127997463859 | 1.16795816727617 |
| GCST90277251 | PCOS | CE (27:1/20:5) levels | Inverse variance weighted | 17 | -0.038046722 | 0.0584231609231906 | 0.514900155615289 | 0.962667961645367 | 0.858510714830402 | 1.07946189647909 |
| GCST90277251 | PCOS | CE (27:1/20:5) levels | Simple mode | 17 | 0.0267779531138557 | 0.18198156688743 | 0.884854591179853 | 1.02713970426718 | 0.718991374406884 | 1.46735553392748 |
| GCST90277251 | PCOS | CE (27:1/20:5) levels | Weighted mode | 17 | 0.0184142315270783 | 0.0720974166764159 | 0.801662496506292 | 1.01858481895853 | 0.884355007153147 | 1.17318839721695 |
| GCST90277252 | PCOS | CE (27:1/22:6) levels | MR Egger | 16 | 0.154524037218818 | 0.199125908708732 | 0.450653432786737 | 1.16710233161446 | 0.789968076484935 | 1.72428214886969 |
| GCST90277252 | PCOS | CE (27:1/22:6) levels | Weighted median | 16 | 0.0475370742598191 | 0.113138739276312 | 0.67436404394228 | 1.0486850796237 | 0.840116375296031 | 1.30903340128068 |
| GCST90277252 | PCOS | CE (27:1/22:6) levels | Inverse variance weighted | 16 | 0.0452342300613879 | 0.0778434700542948 | 0.561178343088056 | 1.04627289977529 | 0.898221150239384 | 1.21872768250051 |
| GCST90277252 | PCOS | CE (27:1/22:6) levels | Simple mode | 16 | 0.0788341272136112 | 0.182613646309321 | 0.672100905316184 | 1.08202482871091 | 0.756472861957884 | 1.5476797500927 |
| GCST90277252 | PCOS | CE (27:1/22:6) levels | Weighted mode | 16 | 0.0439329723980761 | 0.139073394674885 | 0.756432964184254 | 1.04491231457449 | 0.79560624615093 | 1.37233933296985 |
| GCST90277253 | PCOS | CER (d40:1) levels | MR Egger | 18 | -0.122616216 | 0.220402529914774 | 0.585683570309194 | 0.884603093901006 | 0.574298964215875 | 1.36257016379554 |
| GCST90277253 | PCOS | CER (d40:1) levels | Weighted median | 18 | 0.0838197756795078 | 0.102267425103388 | 0.412436400166216 | 1.08743289429296 | 0.889919404121696 | 1.32878358884358 |
| GCST90277253 | PCOS | CER (d40:1) levels | Inverse variance weighted | 18 | 0.104803069619375 | 0.0882589180693291 | 0.235050090177442 | 1.11049189922858 | 0.934088202678102 | 1.32020964906381 |
| GCST90277253 | PCOS | CER (d40:1) levels | Simple mode | 18 | 0.224230231797448 | 0.20476683600348 | 0.288766591781465 | 1.25135908891801 | 0.837685316129795 | 1.86931719974793 |
| GCST90277253 | PCOS | CER (d40:1) levels | Weighted mode | 18 | 0.111072375628809 | 0.121539257417859 | 0.373559684015992 | 1.11747578194013 | 0.880606355093235 | 1.41805940418234 |
| GCST90277254 | PCOS | CER (d40:2) levels | MR Egger | 14 | 0.0363897506500512 | 0.234086811377453 | 0.879047662640752 | 1.0370599625281 | 0.655458426970689 | 1.64082620899293 |
| GCST90277254 | PCOS | CER (d40:2) levels | Weighted median | 14 | 0.0869596541112242 | 0.103366659312563 | 0.400194609006588 | 1.09085266741004 | 0.890796744539513 | 1.33583732685364 |
| GCST90277254 | PCOS | CER (d40:2) levels | Inverse variance weighted | 14 | 0.029637675552422 | 0.0729613713539867 | 0.684587935563314 | 1.0300812427141 | 0.892823280111456 | 1.18844052370473 |
| GCST90277254 | PCOS | CER (d40:2) levels | Simple mode | 14 | -0.207780893 | 0.195084562235057 | 0.306222173403927 | 0.812385016752179 | 0.554246007124606 | 1.19075177260603 |
| GCST90277254 | PCOS | CER (d40:2) levels | Weighted mode | 14 | 0.0437830023563169 | 0.127185687372483 | 0.736167017740084 | 1.04475562078102 | 0.81423932519714 | 1.34053253555305 |
| GCST90277255 | PCOS | CER (d42:1) levels | MR Egger | 12 | 0.2367743655352 | 0.195843374189155 | 0.254472189189869 | 1.26715517163787 | 0.863226083848904 | 1.86009466007941 |
| GCST90277255 | PCOS | CER (d42:1) levels | Weighted median | 12 | 0.0834879713844335 | 0.119461710375197 | 0.484634502367655 | 1.08707213924138 | 0.860142693390638 | 1.37387185288586 |
| GCST90277255 | PCOS | CER (d42:1) levels | Inverse variance weighted | 12 | 0.0119308919683097 | 0.0856637063908554 | 0.889232113313357 | 1.012002349 | 0.855584881010895 | 1.19701595601885 |
| GCST90277255 | PCOS | CER (d42:1) levels | Simple mode | 12 | 0.0168759173162266 | 0.179304012614477 | 0.926707132410702 | 1.01701912003378 | 0.715652942002952 | 1.44529258500557 |
| GCST90277255 | PCOS | CER (d42:1) levels | Weighted mode | 12 | 0.0636328398026753 | 0.128383575356124 | 0.629897125300496 | 1.06570104391537 | 0.828615562450232 | 1.37062199464847 |
| GCST90277256 | PCOS | CER (d42:2) levels | MR Egger | 23 | -0.00561649 | 0.184435161348563 | 0.975993836136106 | 0.99439925333973 | 0.692733851731847 | 1.42743114483365 |
| GCST90277256 | PCOS | CER (d42:2) levels | Weighted median | 23 | 0.0797646602975968 | 0.0942068370489247 | 0.397163948531285 | 1.08303215721529 | 0.900431901405115 | 1.30266225766991 |
| GCST90277256 | PCOS | CER (d42:2) levels | Inverse variance weighted | 23 | 0.0874233860284212 | 0.0721308935094048 | 0.225508437121537 | 1.09135864791946 | 0.947476480286746 | 1.25709051693624 |
| GCST90277256 | PCOS | CER (d42:2) levels | Simple mode | 23 | 0.14768302382305 | 0.203243101600699 | 0.475112299485327 | 1.1591454166422 | 0.778276472115065 | 1.72640204999537 |
| GCST90277256 | PCOS | CER (d42:2) levels | Weighted mode | 23 | 0.0965543036605025 | 0.112682533499443 | 0.400754441310722 | 1.10136938790925 | 0.883111809341636 | 1.37356846074552 |
| GCST90277257 | PCOS | Chol levels | MR Egger | 20 | 0.0106125809199537 | 0.217936274735164 | 0.961697983448159 | 1.0106690940968 | 0.659322479415772 | 1.54924494409408 |
| GCST90277257 | PCOS | Chol levels | Weighted median | 20 | 0.0178154914316174 | 0.1147766857959 | 0.876648882637895 | 1.01797513392644 | 0.812900297116031 | 1.27478532972494 |
| GCST90277257 | PCOS | Chol levels | Inverse variance weighted | 20 | -0.012916645 | 0.0838064319196749 | 0.877511378227315 | 0.987166416953081 | 0.837631299996548 | 1.16339675315858 |
| GCST90277257 | PCOS | Chol levels | Simple mode | 20 | -0.014671964 | 0.209720461094031 | 0.944956887941849 | 0.985435144959585 | 0.653296582963362 | 1.48643426315912 |
| GCST90277257 | PCOS | Chol levels | Weighted mode | 20 | -8.56E-04 | 0.215495861532509 | 0.996872878378424 | 0.999144596932043 | 0.654929516366644 | 1.52427078125401 |
| GCST90277258 | PCOS | DAG (16:0_18:1) levels | MR Egger | 10 | -0.221876241 | 0.227722217404316 | 0.358429843929774 | 0.801014491295382 | 0.512624440513626 | 1.25164577526253 |
| GCST90277258 | PCOS | DAG (16:0_18:1) levels | Weighted median | 10 | 0.202295965859831 | 0.150311865293945 | 0.178353596355535 | 1.22421027894664 | 0.911817617136857 | 1.64363001867034 |
| GCST90277258 | PCOS | DAG (16:0_18:1) levels | Inverse variance weighted | 10 | 0.234014406933169 | 0.122402958123021 | 0.0558972063777831 | 1.26366269758067 | 0.994121952730095 | 1.60628523379002 |
| GCST90277258 | PCOS | DAG (16:0_18:1) levels | Simple mode | 10 | 0.119280581957526 | 0.274859616564502 | 0.674528025019002 | 1.1266860017065 | 0.657412064217924 | 1.93093710251808 |
| GCST90277258 | PCOS | DAG (16:0_18:1) levels | Weighted mode | 10 | 0.260887622237136 | 0.249478487635455 | 0.322956799277868 | 1.29808178171016 | 0.796052441896488 | 2.11671521036163 |
| GCST90277259 | PCOS | DAG (16:0_18:2) levels | MR Egger | 20 | -0.06931242 | 0.172265750711896 | 0.692158898837045 | 0.933035136048772 | 0.665675282586875 | 1.30777661102046 |
| GCST90277259 | PCOS | DAG (16:0_18:2) levels | Weighted median | 20 | 0.144251037424546 | 0.107749744189972 | 0.180648847020751 | 1.15517406405049 | 0.935252753909484 | 1.426809077 |
| GCST90277259 | PCOS | DAG (16:0_18:2) levels | Inverse variance weighted | 20 | 0.12667529650653 | 0.0810311687847455 | 0.117984165314851 | 1.13504840375764 | 0.968365389621589 | 1.33042226899105 |
| GCST90277259 | PCOS | DAG (16:0_18:2) levels | Simple mode | 20 | 0.178704240056815 | 0.224951860678109 | 0.436767019409282 | 1.1956670614457101 | 0.769356054505562 | 1.85820299125999 |
| GCST90277259 | PCOS | DAG (16:0_18:2) levels | Weighted mode | 20 | 0.220689282878253 | 0.199277029190923 | 0.281923261986566 | 1.2469359260231 | 0.843754507712195 | 1.84277439633832 |
| GCST90277260 | PCOS | DAG (16:1_18:1) levels | MR Egger | 13 | 0.0439019273581764 | 0.229618474324483 | 0.851856040471812 | 1.04487987573352 | 0.6662100403124 | 1.63878339960315 |
| GCST90277260 | PCOS | DAG (16:1_18:1) levels | Weighted median | 13 | 0.216591574750304 | 0.123420136533631 | 0.0792742280385109 | 1.24183680104198 | 0.975005767267517 | 1.5816918137255 |
| GCST90277260 | PCOS | DAG (16:1_18:1) levels | Inverse variance weighted | 13 | 0.239784608736485 | 0.093084980912339 | 0.00999577955045127 | 1.27097536384734 | 1.05901374541045 | 1.52536110367557 |
| GCST90277260 | PCOS | DAG (16:1_18:1) levels | Simple mode | 13 | 0.19572474477504 | 0.202917448077283 | 0.353804796609211 | 1.21619209602844 | 0.817100277107288 | 1.81021014908777 |
| GCST90277260 | PCOS | DAG (16:1_18:1) levels | Weighted mode | 13 | 0.192970451738545 | 0.205177580462143 | 0.365506398881486 | 1.2128469554707 | 0.811251139804277 | 1.81324581898208 |
| GCST90277261 | PCOS | DAG (18:1_18:1) levels | MR Egger | 19 | -0.022104611 | 0.176931836327962 | 0.902042122619901 | 0.978137905660116 | 0.691500772833942 | 1.38359030108982 |
| GCST90277261 | PCOS | DAG (18:1_18:1) levels | Weighted median | 19 | 0.212803373113747 | 0.107222074778954 | 0.0471781481878809 | 1.23714137207093 | 1.00265161587815 | 1.52647115932593 |
| GCST90277261 | PCOS | DAG (18:1_18:1) levels | Inverse variance weighted | 19 | 0.162222884221977 | 0.0738747976681461 | 0.0280979233268376 | 1.17612235122504 | 1.01758103942786 | 1.35936473996102 |
| GCST90277261 | PCOS | DAG (18:1_18:1) levels | Simple mode | 19 | 0.213627533281795 | 0.200812018424674 | 0.301474860012524 | 1.23816139498542 | 0.835300262609766 | 1.83532043344808 |
| GCST90277261 | PCOS | DAG (18:1_18:1) levels | Weighted mode | 19 | 0.247741853748969 | 0.153643511514516 | 0.124259655049126 | 1.28112917081092 | 0.948001277817297 | 1.73131829113314 |
| GCST90277262 | PCOS | DAG (18:1_18:2) levels | MR Egger | 24 | 0.201041744997513 | 0.175287217128172 | 0.263732613198469 | 1.2226758113567 | 0.867169169613478 | 1.72392676315177 |
| GCST90277262 | PCOS | DAG (18:1_18:2) levels | Weighted median | 24 | 0.254230354164603 | 0.0987875474439092 | 0.0100673877455695 | 1.28946880456812 | 1.06248102323746 | 1.5649501135445 |
| GCST90277262 | PCOS | DAG (18:1_18:2) levels | Inverse variance weighted | 24 | 0.177840305530768 | 0.068322289159578 | 0.00924222637125237 | 1.1946345294739 | 1.04490776543315 | 1.36581591813486 |
| GCST90277262 | PCOS | DAG (18:1_18:2) levels | Simple mode | 24 | 0.331105241928524 | 0.160612854354493 | 0.0507325617332739 | 1.392506335 | 1.01643768365725 | 1.90771546865578 |
| GCST90277262 | PCOS | DAG (18:1_18:2) levels | Weighted mode | 24 | 0.287933417288596 | 0.135735896895255 | 0.0448908825845764 | 1.3336685019021 | 1.02213242665833 | 1.74015775899099 |
| GCST90277263 | PCOS | DAG (18:1_18:3) levels | MR Egger | 15 | -0.139799938 | 0.271351534594444 | 0.615062416257535 | 0.869532178402663 | 0.510865493398812 | 1.48001033353692 |
| GCST90277263 | PCOS | DAG (18:1_18:3) levels | Weighted median | 15 | 0.11584971963821 | 0.130384391898984 | 0.374258711823891 | 1.12282712058764 | 0.86961587442448 | 1.4497673970838 |
| GCST90277263 | PCOS | DAG (18:1_18:3) levels | Inverse variance weighted | 15 | 0.0868125071236734 | 0.10391301767368 | 0.403473181246206 | 1.09069216353529 | 0.889712406254295 | 1.33707183044188 |
| GCST90277263 | PCOS | DAG (18:1_18:3) levels | Simple mode | 15 | 0.222899113317942 | 0.281423430634118 | 0.441550912363324 | 1.24969448984533 | 0.719865557051497 | 2.16948331900544 |
| GCST90277263 | PCOS | DAG (18:1_18:3) levels | Weighted mode | 15 | 0.298693508151806 | 0.262705017825378 | 0.274628556481755 | 1.34809637959728 | 0.805567463110988 | 2.25600453333218 |
| GCST90277264 | PCOS | PC (16:0_0:0) levels | MR Egger | 16 | -0.117735007 | 0.196483820164598 | 0.558605742144721 | 0.888931581843555 | 0.604808563640609 | 1.30652805648506 |
| GCST90277264 | PCOS | PC (16:0_0:0) levels | Weighted median | 16 | -0.00996069 | 0.122428359356497 | 0.935156189550954 | 0.990088753732597 | 0.778862876236802 | 1.25859861880197 |
| GCST90277264 | PCOS | PC (16:0_0:0) levels | Inverse variance weighted | 16 | 0.0357156757065065 | 0.0899991803281855 | 0.691482166033063 | 1.03636114194759 | 0.868764911671283 | 1.23628889945926 |
| GCST90277264 | PCOS | PC (16:0_0:0) levels | Simple mode | 16 | -0.087111334 | 0.206628117138445 | 0.679307282498699 | 0.916575043558169 | 0.611339734500797 | 1.37421103694441 |
| GCST90277264 | PCOS | PC (16:0_0:0) levels | Weighted mode | 16 | -0.049916891 | 0.199746784247966 | 0.806054136759814 | 0.951308483403828 | 0.643122160065263 | 1.4071787395792 |
| GCST90277265 | PCOS | PC (18:0_0:0) levels | MR Egger | 18 | -0.462274789 | 0.187294834484279 | 0.0252373976135533 | 0.629849240656307 | 0.436322921397594 | 0.909212068631685 |
| GCST90277265 | PCOS | PC (18:0_0:0) levels | Weighted median | 18 | -0.007481348 | 0.12567372382706 | 0.952530028125306 | 0.992546567811146 | 0.775845523311154 | 1.26977427809246 |
| GCST90277265 | PCOS | PC (18:0_0:0) levels | Inverse variance weighted | 18 | 0.0360551467572097 | 0.0986918759962111 | 0.714864756485015 | 1.03671301627555 | 0.854378538237827 | 1.25795982695433 |
| GCST90277265 | PCOS | PC (18:0_0:0) levels | Simple mode | 18 | -0.068069575 | 0.264742901315305 | 0.800175559473272 | 0.93419547422318 | 0.556011855536258 | 1.56960894874689 |
| GCST90277265 | PCOS | PC (18:0_0:0) levels | Weighted mode | 18 | -0.085835047 | 0.234791140378031 | 0.719187315802693 | 0.91774560371174 | 0.579247354931852 | 1.45405410307194 |
| GCST90277267 | PCOS | PC (18:2_0:0) levels | MR Egger | 13 | -0.084325353 | 0.261051241238879 | 0.752735645184532 | 0.919132164867935 | 0.5510191111156 | 1.53316630848686 |
| GCST90277267 | PCOS | PC (18:2_0:0) levels | Weighted median | 13 | -0.06547881 | 0.121562343954292 | 0.590132619373887 | 0.936618893622264 | 0.738051994195565 | 1.18860860588332 |
| GCST90277267 | PCOS | PC (18:2_0:0) levels | Inverse variance weighted | 13 | -0.050525708 | 0.0973001516325096 | 0.603567752135727 | 0.950729486806636 | 0.785657756712153 | 1.15048384536573 |
| GCST90277267 | PCOS | PC (18:2_0:0) levels | Simple mode | 13 | -0.050987094 | 0.197878678273774 | 0.801028372914019 | 0.950290934910881 | 0.644790833830834 | 1.40053613294807 |
| GCST90277267 | PCOS | PC (18:2_0:0) levels | Weighted mode | 13 | -0.062452439 | 0.188126338312259 | 0.745637829171159 | 0.939457743697205 | 0.649741906628347 | 1.35835605367145 |
| GCST90277268 | PCOS | PC (20:4_0:0) levels | MR Egger | 14 | -0.014567117 | 0.077443039442233 | 0.853940793262978 | 0.985538469690788 | 0.846745184152542 | 1.14708190069314 |
| GCST90277268 | PCOS | PC (20:4_0:0) levels | Weighted median | 14 | 0.00948658771912838 | 0.0569230607986857 | 0.867640477977849 | 1.00953172802197 | 0.902954954172912 | 1.12868787659131 |
| GCST90277268 | PCOS | PC (20:4_0:0) levels | Inverse variance weighted | 14 | 0.0230317558593236 | 0.0488317348746574 | 0.637172711937247 | 1.02329903477145 | 0.929899796354694 | 1.12607930302715 |
| GCST90277268 | PCOS | PC (20:4_0:0) levels | Simple mode | 14 | 0.022332014711295 | 0.152970378935529 | 0.886169407043697 | 1.02258324079454 | 0.757683195947919 | 1.38009723581852 |
| GCST90277268 | PCOS | PC (20:4_0:0) levels | Weighted mode | 14 | 0.0106369738035357 | 0.0582016203796308 | 0.857805104093656 | 1.01069374753104 | 0.901731746111761 | 1.13282232293919 |
| GCST90277269 | PCOS | PE (18:0_0:0) levels | MR Egger | 13 | -0.22755314 | 0.312806445851068 | 0.482142816834896 | 0.796480095628019 | 0.43142837472343 | 1.47041914695178 |
| GCST90277269 | PCOS | PE (18:0_0:0) levels | Weighted median | 13 | 0.152741605803255 | 0.129834555054116 | 0.239422042920806 | 1.16502390463046 | 0.903269679188058 | 1.50263064246821 |
| GCST90277269 | PCOS | PE (18:0_0:0) levels | Inverse variance weighted | 13 | 0.184399793120466 | 0.10916982599533 | 0.0911984425116141 | 1.20249647682769 | 0.970859938362028 | 1.48939895410929 |
| GCST90277269 | PCOS | PE (18:0_0:0) levels | Simple mode | 13 | 0.204305066901174 | 0.230857332318824 | 0.393552770545262 | 1.22667231350282 | 0.780223154702449 | 1.9285828107578 |
| GCST90277269 | PCOS | PE (18:0_0:0) levels | Weighted mode | 13 | 0.178664103134562 | 0.190900582094987 | 0.36777701955484 | 1.1956190720129 | 0.822422490077027 | 1.73816375720357 |
| GCST90277270 | PCOS | PE (18:1_0:0) levels | MR Egger | 8 | 0.722055088895521 | 0.315300007533331 | 0.0619391766458033 | 2.0586595948318 | 1.10967488289703 | 3.81920812367016 |
| GCST90277270 | PCOS | PE (18:1_0:0) levels | Weighted median | 8 | -0.047639235 | 0.15439818589909 | 0.757665462746125 | 0.953477706379033 | 0.704505120491326 | 1.29043737244634 |
| GCST90277270 | PCOS | PE (18:1_0:0) levels | Inverse variance weighted | 8 | -0.049757227 | 0.15100696875684 | 0.741775636730267 | 0.951460385113628 | 0.707702914231135 | 1.27917639766128 |
| GCST90277270 | PCOS | PE (18:1_0:0) levels | Simple mode | 8 | -0.032726194 | 0.249437868935121 | 0.899308417226707 | 0.967803513714496 | 0.59355558257811 | 1.57802178709163 |
| GCST90277270 | PCOS | PE (18:1_0:0) levels | Weighted mode | 8 | -0.067098557 | 0.229634615596754 | 0.778606363500418 | 0.935103035800655 | 0.596198029038152 | 1.46665645469224 |
| GCST90277271 | PCOS | PE (18:2_0:0) levels | MR Egger | 17 | -0.068972139 | 0.128062494334463 | 0.598077913353016 | 0.933352684063507 | 0.726167461398798 | 1.19965060286574 |
| GCST90277271 | PCOS | PE (18:2_0:0) levels | Weighted median | 17 | -0.026502475 | 0.080727384675638 | 0.742687894237583 | 0.97384563384974 | 0.831330251369238 | 1.14079250334772 |
| GCST90277271 | PCOS | PE (18:2_0:0) levels | Inverse variance weighted | 17 | -0.11794026 | 0.0698647181042059 | 0.0913875597062629 | 0.888749145311214 | 0.77501328563217 | 1.01917613276413 |
| GCST90277271 | PCOS | PE (18:2_0:0) levels | Simple mode | 17 | -0.131550082 | 0.189973801302416 | 0.498573545667105 | 0.876735365270756 | 0.604170562494948 | 1.27226473521353 |
| GCST90277271 | PCOS | PE (18:2_0:0) levels | Weighted mode | 17 | -0.039482106 | 0.0791031143875601 | 0.624486213759209 | 0.96128715502802 | 0.823226247474083 | 1.12250186052402 |
| GCST90277272 | PCOS | PC (14:0_16:0) levels | MR Egger | 8 | 0.584251463796468 | 0.406811228805961 | 0.200972728166398 | 1.7936478726492 | 0.808076501666014 | 3.98127242213594 |
| GCST90277272 | PCOS | PC (14:0_16:0) levels | Weighted median | 8 | 0.0522967210555403 | 0.159898801518895 | 0.743621468847555 | 1.05368834765153 | 0.770200098339014 | 1.4415203742131 |
| GCST90277272 | PCOS | PC (14:0_16:0) levels | Inverse variance weighted | 8 | 0.0203696831812901 | 0.135456572687722 | 0.880466428251737 | 1.02057856102553 | 0.782606550326162 | 1.330912192 |
| GCST90277272 | PCOS | PC (14:0_16:0) levels | Simple mode | 8 | 0.0830429215958806 | 0.275514299833456 | 0.771858290895494 | 1.08658844565751 | 0.633202434593833 | 1.86460819752495 |
| GCST90277272 | PCOS | PC (14:0_16:0) levels | Weighted mode | 8 | 0.0683406562133055 | 0.266700937379526 | 0.805129493882543 | 1.07072999718482 | 0.634833079832386 | 1.80592783094119 |
| GCST90277273 | PCOS | PC (14:0_18:1) levels | MR Egger | 8 | 0.171750492596764 | 0.245297420187824 | 0.510043103810185 | 1.1873815357676 | 0.73415694553368 | 1.92039988187668 |
| GCST90277273 | PCOS | PC (14:0_18:1) levels | Weighted median | 8 | 0.136890408248425 | 0.154031191049357 | 0.374154249263186 | 1.1467024725015 | 0.847884609452192 | 1.55083197145259 |
| GCST90277273 | PCOS | PC (14:0_18:1) levels | Inverse variance weighted | 8 | 0.157260064 | 0.120805396708753 | 0.192997223533466 | 1.17029992666715 | 0.923560920992203 | 1.48295785066971 |
| GCST90277273 | PCOS | PC (14:0_18:1) levels | Simple mode | 8 | 0.133899556795117 | 0.24714727310694 | 0.604777841713076 | 1.14327797937296 | 0.70432942537864 | 1.85578578861226 |
| GCST90277273 | PCOS | PC (14:0_18:1) levels | Weighted mode | 8 | 0.137680361510254 | 0.224726835825904 | 0.559472521278875 | 1.1476086717404 | 0.738758476136134 | 1.78272832867108 |
| GCST90277274 | PCOS | PC (14:0_18:2) levels | MR Egger | 12 | 0.0523043586273243 | 0.207159504082283 | 0.805781240855876 | 1.05369639530266 | 0.702065714194387 | 1.58144183803057 |
| GCST90277274 | PCOS | PC (14:0_18:2) levels | Weighted median | 12 | 0.022197134357548 | 0.118263114506354 | 0.851117479641958 | 1.02244532370665 | 0.810909704063268 | 1.28916257227085 |
| GCST90277274 | PCOS | PC (14:0_18:2) levels | Inverse variance weighted | 12 | 0.158361785528519 | 0.088064338406202 | 0.0721372392463368 | 1.1715899823439 | 0.985856652560155 | 1.39231508268878 |
| GCST90277274 | PCOS | PC (14:0_18:2) levels | Simple mode | 12 | -0.031088111 | 0.202566142782464 | 0.880805778828218 | 0.969390155248202 | 0.651734667880245 | 1.4418709321518 |
| GCST90277274 | PCOS | PC (14:0_18:2) levels | Weighted mode | 12 | -0.003237839 | 0.144588214110118 | 0.982535107137819 | 0.996767397381099 | 0.750788915156436 | 1.32333499393085 |
| GCST90277275 | PCOS | PC (15:0_18:1) levels | MR Egger | 8 | -0.515489528 | 0.30471418205155 | 0.141650317575069 | 0.59720817297901 | 0.328660714012833 | 1.08518477160918 |
| GCST90277275 | PCOS | PC (15:0_18:1) levels | Weighted median | 8 | -0.34074775 | 0.158350440151939 | 0.0314084960752757 | 0.711238295535565 | 0.521464222143602 | 0.970075973682104 |
| GCST90277275 | PCOS | PC (15:0_18:1) levels | Inverse variance weighted | 8 | -0.308915155 | 0.123835452951193 | 0.0126112863881904 | 0.734243063893838 | 0.576008625685002 | 0.935945839760796 |
| GCST90277275 | PCOS | PC (15:0_18:1) levels | Simple mode | 8 | -0.379039053 | 0.244216960602159 | 0.164588866919831 | 0.6845188798858 | 0.424134653395654 | 1.10475787151259 |
| GCST90277275 | PCOS | PC (15:0_18:1) levels | Weighted mode | 8 | -0.381429971 | 0.233655249400823 | 0.146604275197727 | 0.682884206168865 | 0.431972107109791 | 1.07953923727848 |
| GCST90277276 | PCOS | PC (15:0_18:2) levels | MR Egger | 25 | -0.014900039 | 0.118014867463647 | 0.900626810371347 | 0.985210417755263 | 0.781758680504822 | 1.24161021995523 |
| GCST90277276 | PCOS | PC (15:0_18:2) levels | Weighted median | 25 | -0.019126158 | 0.0866437743783351 | 0.825291188257536 | 0.981055586431359 | 0.827829589323287 | 1.16264274203457 |
| GCST90277276 | PCOS | PC (15:0_18:2) levels | Inverse variance weighted | 25 | -0.003932403 | 0.0565813334633163 | 0.944591624865813 | 0.996075318543154 | 0.891516069308797 | 1.11289753978308 |
| GCST90277276 | PCOS | PC (15:0_18:2) levels | Simple mode | 25 | 0.00353463839264334 | 0.169332074939883 | 0.983518741334311 | 1.00354089259354 | 0.720106451576033 | 1.39853534280007 |
| GCST90277276 | PCOS | PC (15:0_18:2) levels | Weighted mode | 25 | -0.013690897 | 0.0933428872017781 | 0.88461510665902 | 0.986402396985541 | 0.821483886836729 | 1.18442942627334 |
| GCST90277277 | PCOS | PC (16:0_16:0) levels | MR Egger | 19 | 0.164773711838112 | 0.231223939755348 | 0.485750755746457 | 1.17912626620433 | 0.749442853820844 | 1.85516313160461 |
| GCST90277277 | PCOS | PC (16:0_16:0) levels | Weighted median | 19 | 0.110781098657367 | 0.108069664436875 | 0.30532087048856 | 1.11715033437869 | 0.903900994777627 | 1.38070969808974 |
| GCST90277277 | PCOS | PC (16:0_16:0) levels | Inverse variance weighted | 19 | 0.0991192867521017 | 0.0798824567673567 | 0.214674393988292 | 1.10419800789724 | 0.944168787490364 | 1.29135092877307 |
| GCST90277277 | PCOS | PC (16:0_16:0) levels | Simple mode | 19 | 0.189742369183019 | 0.211269664349804 | 0.380986037858976 | 1.20893809782317 | 0.799038480984959 | 1.82911256359858 |
| GCST90277277 | PCOS | PC (16:0_16:0) levels | Weighted mode | 19 | 0.135054592777112 | 0.176607002254333 | 0.454348989948883 | 1.14459926949848 | 0.80969703540927 | 1.61802184081636 |
| GCST90277278 | PCOS | PC (16:0_16:1) levels | MR Egger | 11 | 0.319876643275237 | 0.350190188583478 | 0.384829620884336 | 1.37695789684273 | 0.693158821533146 | 2.73532268619753 |
| GCST90277278 | PCOS | PC (16:0_16:1) levels | Weighted median | 11 | -0.099439962 | 0.158619465748085 | 0.53071892186116 | 0.905344303007834 | 0.663428551547452 | 1.23547336797143 |
| GCST90277278 | PCOS | PC (16:0_16:1) levels | Inverse variance weighted | 11 | -0.06930713 | 0.129259400720418 | 0.591829748259756 | 0.933040071787742 | 0.724223266442137 | 1.20206546226892 |
| GCST90277278 | PCOS | PC (16:0_16:1) levels | Simple mode | 11 | -0.268189732 | 0.269529017523726 | 0.34318815214125 | 0.76476266738426 | 0.450919428439571 | 1.29704310911737 |
| GCST90277278 | PCOS | PC (16:0_16:1) levels | Weighted mode | 11 | -0.257736896 | 0.27400278329377 | 0.369057790711443 | 0.772798531890108 | 0.451679531792104 | 1.32221526293644 |
| GCST90277279 | PCOS | PC (16:0_17:1) levels | MR Egger | 9 | 0.0159732338344507 | 0.303417979279229 | 0.959486157564701 | 1.01610148790147 | 0.56061212854324 | 1.84166945584722 |
| GCST90277279 | PCOS | PC (16:0_17:1) levels | Weighted median | 9 | -0.090138291 | 0.171029572733141 | 0.598170418296229 | 0.913804805218981 | 0.653536918562146 | 1.2777231068728 |
| GCST90277279 | PCOS | PC (16:0_17:1) levels | Inverse variance weighted | 9 | 0.00425878526222165 | 0.140604608390547 | 0.975836499632116 | 1.00426786677567 | 0.762367735502191 | 1.32292317902698 |
| GCST90277279 | PCOS | PC (16:0_17:1) levels | Simple mode | 9 | -0.054078285 | 0.303052386283456 | 0.862809335030665 | 0.94735794004987 | 0.523059025548643 | 1.71584280690721 |
| GCST90277279 | PCOS | PC (16:0_17:1) levels | Weighted mode | 9 | -0.065193462 | 0.262979901949875 | 0.810454031877231 | 0.936886193717489 | 0.559543464287306 | 1.56869983477771 |
| GCST90277280 | PCOS | PC (16:0_18:0) levels | MR Egger | 17 | -0.047103994 | 0.240687146012881 | 0.847466533197383 | 0.953988183359908 | 0.595204163588705 | 1.52904416612789 |
| GCST90277280 | PCOS | PC (16:0_18:0) levels | Weighted median | 17 | -0.078616342 | 0.118387483974846 | 0.506652181304015 | 0.924394507375625 | 0.732966111319147 | 1.16581816276381 |
| GCST90277280 | PCOS | PC (16:0_18:0) levels | Inverse variance weighted | 17 | -0.023286921 | 0.0854161377316502 | 0.785138372164219 | 0.97698212664024 | 0.82637835686027294 | 1.15503276174968 |
| GCST90277280 | PCOS | PC (16:0_18:0) levels | Simple mode | 17 | 0.0244619313110357 | 0.199219057804792 | 0.903803227063747 | 1.02476357895868 | 0.693497654060527 | 1.51426668368882 |
| GCST90277280 | PCOS | PC (16:0_18:0) levels | Weighted mode | 17 | -0.075082608 | 0.185295833040499 | 0.690693893833961 | 0.927666850093575 | 0.64515644503544 | 1.33388698413338 |
| GCST90277281 | PCOS | PC (16:0_18:1) levels | MR Egger | 10 | 0.430566944179992 | 0.494484422041896 | 0.409263767803073 | 1.53812930985814 | 0.583551527795217 | 4.05421228658819 |
| GCST90277281 | PCOS | PC (16:0_18:1) levels | Weighted median | 10 | 0.205660114203507 | 0.160029785194287 | 0.198744597097526 | 1.22833563920007 | 0.897629154015571 | 1.68088172691288 |
| GCST90277281 | PCOS | PC (16:0_18:1) levels | Inverse variance weighted | 10 | 0.212032368831876 | 0.113525747095235 | 0.0618034920446348 | 1.23618789838916 | 0.989576608536271 | 1.54425691446383 |
| GCST90277281 | PCOS | PC (16:0_18:1) levels | Simple mode | 10 | 0.363806881454276 | 0.288379203723598 | 0.238823334403088 | 1.43879632907186 | 0.817571958181594 | 2.53205220144166 |
| GCST90277281 | PCOS | PC (16:0_18:1) levels | Weighted mode | 10 | 0.317491947833386 | 0.273121018895945 | 0.274945814034954 | 1.37367818373521 | 0.80426597550749 | 2.34622849894822 |
| GCST90277282 | PCOS | PC (16:0_18:2) levels | MR Egger | 21 | -0.041709046 | 0.128648382208927 | 0.749321335798946 | 0.959148808560255 | 0.745380930842695 | 1.23422319903259 |
| GCST90277282 | PCOS | PC (16:0_18:2) levels | Weighted median | 21 | -0.021162817 | 0.0845401345609046 | 0.802333210227881 | 0.979059544181387 | 0.829558638384447 | 1.1555031153909 |
| GCST90277282 | PCOS | PC (16:0_18:2) levels | Inverse variance weighted | 21 | 0.0475310162044209 | 0.057640102835249 | 0.409588992686782 | 1.0486787266506301 | 0.936651886154987 | 1.17410436896042 |
| GCST90277282 | PCOS | PC (16:0_18:2) levels | Simple mode | 21 | 0.0316440104887716 | 0.147158202711178 | 0.831918401581179 | 1.03215000532002 | 0.773533680581547 | 1.37722979648565 |
| GCST90277282 | PCOS | PC (16:0_18:2) levels | Weighted mode | 21 | -0.009389233 | 0.0848803066321788 | 0.913022317932472 | 0.990654707778331 | 0.838823776553827 | 1.16996773037989 |
| GCST90277283 | PCOS | PC (16:0_18:3) levels | MR Egger | 10 | -0.324161553 | 0.271625094205431 | 0.266894288047951 | 0.72313340871069 | 0.424625898104802 | 1.23148853879958 |
| GCST90277283 | PCOS | PC (16:0_18:3) levels | Weighted median | 10 | -0.033615623 | 0.152192956991521 | 0.825189745740945 | 0.966943103997172 | 0.717549159574973 | 1.3030172969912 |
| GCST90277283 | PCOS | PC (16:0_18:3) levels | Inverse variance weighted | 10 | 0.00424600287237033 | 0.112803302220774 | 0.969974103172719 | 1.00425502991433 | 0.805051950003201 | 1.25274917364552 |
| GCST90277283 | PCOS | PC (16:0_18:3) levels | Simple mode | 10 | -0.056420666 | 0.264303252710839 | 0.835718201785914 | 0.945141463203171 | 0.563011603182882 | 1.58663228327048 |
| GCST90277283 | PCOS | PC (16:0_18:3) levels | Weighted mode | 10 | -0.045029662 | 0.262530684292648 | 0.867608288879288 | 0.955969125141981 | 0.571443419846047 | 1.59924313849118 |
| GCST90277284 | PCOS | PC (16:0_20:1) levels | MR Egger | 9 | -0.702044439 | 0.523627517838813 | 0.221881574279025 | 0.495571102483415 | 0.177576393980268 | 1.38301444303412 |
| GCST90277284 | PCOS | PC (16:0_20:1) levels | Weighted median | 9 | 0.0158822001703306 | 0.145763715535002 | 0.913235382713946 | 1.01600899267006 | 0.763520975194607 | 1.35199202998101 |
| GCST90277284 | PCOS | PC (16:0_20:1) levels | Inverse variance weighted | 9 | 0.0287036111764029 | 0.117769768118551 | 0.80744266268372 | 1.02911952974171 | 0.81699268770803 | 1.29632372777649 |
| GCST90277284 | PCOS | PC (16:0_20:1) levels | Simple mode | 9 | 0.179004144964093 | 0.263714859693489 | 0.516429473714166 | 1.1960257016412 | 0.713283030554472 | 2.00548368278765 |
| GCST90277284 | PCOS | PC (16:0_20:1) levels | Weighted mode | 9 | -0.025145271 | 0.221800698322442 | 0.912531555226903 | 0.975168238413658 | 0.631362788587741 | 1.50619122697733 |
| GCST90277285 | PCOS | PC (16:0_20:2) levels | MR Egger | 23 | -0.164217203 | 0.127075105352803 | 0.210298568502434 | 0.848557692719188 | 0.661474126656262 | 1.0885537753574 |
| GCST90277285 | PCOS | PC (16:0_20:2) levels | Weighted median | 23 | -0.067582314 | 0.0975191455303792 | 0.488299602336533 | 0.934650782695272 | 0.772039287936375 | 1.1315124751331 |
| GCST90277285 | PCOS | PC (16:0_20:2) levels | Inverse variance weighted | 23 | -0.038787036 | 0.0632528360005283 | 0.539739959339405 | 0.961955549577993 | 0.84979291023021 | 1.088922334 |
| GCST90277285 | PCOS | PC (16:0_20:2) levels | Simple mode | 23 | -0.124152264 | 0.167605741163186 | 0.466684303698057 | 0.883245344171033 | 0.635934621898026 | 1.22673355269042 |
| GCST90277285 | PCOS | PC (16:0_20:2) levels | Weighted mode | 23 | -0.077155936 | 0.106780726873082 | 0.477559166058064 | 0.925745485571368 | 0.750927507093625 | 1.14126156780792 |
| GCST90277286 | PCOS | PC (16:0_20:3) levels | MR Egger | 9 | 0.100984875355783 | 0.218552650756615 | 0.658054380768625 | 1.10625990984934 | 0.720810994129688 | 1.69782508605812 |
| GCST90277286 | PCOS | PC (16:0_20:3) levels | Weighted median | 9 | 0.030401449957449 | 0.122400588446531 | 0.803842986598418 | 1.03086829292853 | 0.810986636021446 | 1.31036615175158 |
| GCST90277286 | PCOS | PC (16:0_20:3) levels | Inverse variance weighted | 9 | -0.040558693 | 0.0957840996500657 | 0.671975224568787 | 0.960252802464403 | 0.79588901710909 | 1.1585603329344 |
| GCST90277286 | PCOS | PC (16:0_20:3) levels | Simple mode | 9 | 0.0473082703205889 | 0.204525132897424 | 0.822881987329645 | 1.04844516379436 | 0.702183165019616 | 1.56545658774526 |
| GCST90277286 | PCOS | PC (16:0_20:3) levels | Weighted mode | 9 | 0.0327168998759342 | 0.136283532177113 | 0.816316926117925 | 1.03325798236882 | 0.791046265379384 | 1.34963289108867 |
| GCST90277287 | PCOS | PC (16:0_20:4) levels | MR Egger | 15 | 0.0022324630793672 | 0.070121087997516 | 0.975085449330132 | 1.0022349568805 | 0.873536932371456 | 1.14989403603844 |
| GCST90277287 | PCOS | PC (16:0_20:4) levels | Weighted median | 15 | 0.0083486747761375 | 0.050214033972602 | 0.867950940834888 | 1.00838362214845 | 0.91386645216362 | 1.11267628547892 |
| GCST90277287 | PCOS | PC (16:0_20:4) levels | Inverse variance weighted | 15 | 0.00314553215156424 | 0.045256558120227 | 0.944588091152442 | 1.00315048452908 | 0.918000520136713 | 1.09619861049868 |
| GCST90277287 | PCOS | PC (16:0_20:4) levels | Simple mode | 15 | -0.307380421 | 0.176361037178869 | 0.103261281915675 | 0.735370797364142 | 0.520456975835927 | 1.03902961190485 |
| GCST90277287 | PCOS | PC (16:0_20:4) levels | Weighted mode | 15 | 0.00702461758721273 | 0.0495536671471615 | 0.889291055948593 | 1.00704934808686 | 0.913839275814274 | 1.10976669128005 |
| GCST90277288 | PCOS | PC (16:0_20:5) levels | MR Egger | 12 | 0.155559879959682 | 0.117640762538024 | 0.215503707584072 | 1.16831189244175 | 0.927728628992912 | 1.47128442021084 |
| GCST90277288 | PCOS | PC (16:0_20:5) levels | Weighted median | 12 | 0.0214063423172181 | 0.0814236714256885 | 0.792627096858688 | 1.02163710169288 | 0.870938377582096 | 1.19841127044265 |
| GCST90277288 | PCOS | PC (16:0_20:5) levels | Inverse variance weighted | 12 | 0.00878025612293737 | 0.0669145489720076 | 0.895604478647108 | 1.0088189156357 | 0.884818924616116 | 1.15019647097391 |
| GCST90277288 | PCOS | PC (16:0_20:5) levels | Simple mode | 12 | 0.0933131251948016 | 0.186146511411059 | 0.626048218343248 | 1.09780543199497 | 0.76220933957698 | 1.58116242341838 |
| GCST90277288 | PCOS | PC (16:0_20:5) levels | Weighted mode | 12 | 0.0282044568189352 | 0.0821935229281329 | 0.737956259478677 | 1.02860596842794 | 0.875557153749044 | 1.2084079648658 |
| GCST90277289 | PCOS | PC (16:0_22:4) levels | MR Egger | 18 | 0.0578507809224052 | 0.155244609563265 | 0.714304524980628 | 1.05955687781351 | 0.781587122802107 | 1.43638596973938 |
| GCST90277289 | PCOS | PC (16:0_22:4) levels | Weighted median | 18 | 0.0216446478226352 | 0.09452378711828 | 0.818879600872692 | 1.02188059245019 | 0.849062928294638 | 1.22987344097537 |
| GCST90277289 | PCOS | PC (16:0_22:4) levels | Inverse variance weighted | 18 | -0.044068183 | 0.0704948414034659 | 0.531888136028779 | 0.956888711897016 | 0.83340290694003 | 1.09867148210201 |
| GCST90277289 | PCOS | PC (16:0_22:4) levels | Simple mode | 18 | -0.074984619 | 0.178834862567368 | 0.680250843759133 | 0.927757756289148 | 0.653442361575579 | 1.31723087600148 |
| GCST90277289 | PCOS | PC (16:0_22:4) levels | Weighted mode | 18 | 0.00256198799162188 | 0.102160528485799 | 0.980284726424546 | 1.00256527268737 | 0.82063844694079 | 1.22482334302725 |
| GCST90277290 | PCOS | PC (16:0_22:5) levels | MR Egger | 18 | -0.022314847 | 0.128005849405331 | 0.863795364638618 | 0.977932287337078 | 0.760935781227353 | 1.25680981524325 |
| GCST90277290 | PCOS | PC (16:0_22:5) levels | Weighted median | 18 | 0.00647326882156646 | 0.0688116449552044 | 0.925051734407855 | 1.0064942657079 | 0.879503658300075 | 1.15182091324201 |
| GCST90277290 | PCOS | PC (16:0_22:5) levels | Inverse variance weighted | 18 | 0.00631469574238741 | 0.0745206582529657 | 0.932470066864531 | 1.0063346754667 | 0.869579259193141 | 1.1645970949058 |
| GCST90277290 | PCOS | PC (16:0_22:5) levels | Simple mode | 18 | -0.076669425 | 0.24405422550987 | 0.757230170630065 | 0.926195980665456 | 0.57406324457772 | 1.4943283735782 |
| GCST90277290 | PCOS | PC (16:0_22:5) levels | Weighted mode | 18 | 0.00158694489509981 | 0.0728988789609319 | 0.982885598155889 | 1.00158820475851 | 0.868233268540581 | 1.15542558464457 |
| GCST90277291 | PCOS | PC (16:0_22:6) levels | MR Egger | 13 | -0.111584048 | 0.219049365984923 | 0.620534456879892 | 0.894416214523502 | 0.582211901764975 | 1.37403643308804 |
| GCST90277291 | PCOS | PC (16:0_22:6) levels | Weighted median | 13 | 0.136406766675008 | 0.127977007457399 | 0.286482716821852 | 1.14614801360395 | 0.891876001406322 | 1.47291245309538 |
| GCST90277291 | PCOS | PC (16:0_22:6) levels | Inverse variance weighted | 13 | 0.143205523237149 | 0.096194680373703 | 0.136565008660384 | 1.15396694431797 | 0.955676272571272 | 1.39340040848325 |
| GCST90277291 | PCOS | PC (16:0_22:6) levels | Simple mode | 13 | 0.18092327694049 | 0.229534611145364 | 0.445861276325794 | 1.19832323674118 | 0.764170336673931 | 1.8791341547802 |
| GCST90277291 | PCOS | PC (16:0_22:6) levels | Weighted mode | 13 | 0.145949138780952 | 0.185903112587275 | 0.447628739572387 | 1.15713733313872 | 0.803787006739854 | 1.66582290646153 |
| GCST90277292 | PCOS | PC (16:1_18:0) levels | MR Egger | 11 | -0.116738636 | 0.276492290843435 | 0.682776817534486 | 0.889817729190269 | 0.517542554686161 | 1.52987533877569 |
| GCST90277292 | PCOS | PC (16:1_18:0) levels | Weighted median | 11 | 0.0589635181798482 | 0.157096559163042 | 0.707412848689427 | 1.0607365424345 | 0.779622276272661 | 1.44321429325397 |
| GCST90277292 | PCOS | PC (16:1_18:0) levels | Inverse variance weighted | 11 | 0.111547816760023 | 0.117530495451458 | 0.342571383405812 | 1.11800720220951 | 0.887974764877209 | 1.40763020936207 |
| GCST90277292 | PCOS | PC (16:1_18:0) levels | Simple mode | 11 | -0.041661965 | 0.272344846609004 | 0.881460678277642 | 0.959193966657761 | 0.562447285132337 | 1.63580319434944 |
| GCST90277292 | PCOS | PC (16:1_18:0) levels | Weighted mode | 11 | -0.041661965 | 0.240797612163727 | 0.866090283837143 | 0.959193966657761 | 0.598322552436208 | 1.53772085295204 |
| GCST90277293 | PCOS | PC (16:1_18:1) levels | MR Egger | 19 | -0.14271929 | 0.242362932706607 | 0.563694720180174 | 0.866997409479546 | 0.539155831170716 | 1.39418784808846 |
| GCST90277293 | PCOS | PC (16:1_18:1) levels | Weighted median | 19 | -0.048188446 | 0.112140229581353 | 0.667402276816181 | 0.952954190034535 | 0.764920558472785 | 1.18721046028296 |
| GCST90277293 | PCOS | PC (16:1_18:1) levels | Inverse variance weighted | 19 | 0.00445478539561849 | 0.085997789171266 | 0.958687129773598 | 1.00446472270279 | 0.848656403932423 | 1.18887853138116 |
| GCST90277293 | PCOS | PC (16:1_18:1) levels | Simple mode | 19 | -0.039838201 | 0.189409892747066 | 0.835774201617376 | 0.960944906712715 | 0.66293284033071 | 1.39292407550131 |
| GCST90277293 | PCOS | PC (16:1_18:1) levels | Weighted mode | 19 | -0.04868414 | 0.148412992460377 | 0.746672761621648 | 0.952481933290236 | 0.712073882741863 | 1.27405576195411 |
| GCST90277294 | PCOS | PC (16:1_18:2) levels | MR Egger | 18 | -0.082999287 | 0.128605148930998 | 0.527827759336631 | 0.920351803128247 | 0.715291319625647 | 1.18419924621024 |
| GCST90277294 | PCOS | PC (16:1_18:2) levels | Weighted median | 18 | -0.023219811 | 0.0773995837716785 | 0.76417778651076 | 0.977047694224866 | 0.839521665388219 | 1.13710251461906 |
| GCST90277294 | PCOS | PC (16:1_18:2) levels | Inverse variance weighted | 18 | 0.0478470878977808 | 0.0680900163520839 | 0.48224059096938 | 1.04901023669927 | 0.91795276479945 | 1.19877897741314 |
| GCST90277294 | PCOS | PC (16:1_18:2) levels | Simple mode | 18 | 0.0202915509254888 | 0.176129862240459 | 0.909630215123623 | 1.02049882403539 | 0.72258300551698 | 1.44124320930094 |
| GCST90277294 | PCOS | PC (16:1_18:2) levels | Weighted mode | 18 | -0.013226013 | 0.0790836891510199 | 0.869153910072622 | 0.98686106687319 | 0.845159389116631 | 1.15232082593085 |
| GCST90277295 | PCOS | PC (16:1_20:4) levels | MR Egger | 13 | 0.0959393638154326 | 0.172718206015818 | 0.589692962988234 | 1.10069232018778 | 0.784594449155968 | 1.54413988656643 |
| GCST90277295 | PCOS | PC (16:1_20:4) levels | Weighted median | 13 | 0.00249407720918911 | 0.089788376897434 | 0.977839784030657 | 1.00249719000707 | 0.840724598679528 | 1.19539813340844 |
| GCST90277295 | PCOS | PC (16:1_20:4) levels | Inverse variance weighted | 13 | -0.051773988 | 0.084228039857034 | 0.538760605644941 | 0.949543450443131 | 0.805041905414366 | 1.11998239869931 |
| GCST90277295 | PCOS | PC (16:1_20:4) levels | Simple mode | 13 | -0.057629532 | 0.174827470607091 | 0.747357333182386 | 0.943999604339701 | 0.670124760414367 | 1.32980499398722 |
| GCST90277295 | PCOS | PC (16:1_20:4) levels | Weighted mode | 13 | 0.00704419853518745 | 0.088671712855227 | 0.937991022067475 | 1.00706906726081 | 0.846409191291212 | 1.19822435373887 |
| GCST90277296 | PCOS | PC (17:0_18:1) levels | MR Egger | 13 | -0.359779047 | 0.188176138562878 | 0.0822715135761662 | 0.697830496493032 | 0.482582070197238 | 1.00908722455578 |
| GCST90277296 | PCOS | PC (17:0_18:1) levels | Weighted median | 13 | 0.0458131765949651 | 0.135448811385999 | 0.735188061246567 | 1.04687881122203 | 0.802786487655754 | 1.36518895402187 |
| GCST90277296 | PCOS | PC (17:0_18:1) levels | Inverse variance weighted | 13 | 0.0237408465436272 | 0.103157678442672 | 0.817981940768102 | 1.02402490390737 | 0.836567387265486 | 1.25348778805516 |
| GCST90277296 | PCOS | PC (17:0_18:1) levels | Simple mode | 13 | 0.182662843258625 | 0.241800416490037 | 0.464562274615112 | 1.20040961365143 | 0.747316885422338 | 1.92820912875856 |
| GCST90277296 | PCOS | PC (17:0_18:1) levels | Weighted mode | 13 | 0.139694917262709 | 0.224893513420126 | 0.546112661970751 | 1.14992292370373 | 0.740006455598113 | 1.78690702014292 |
| GCST90277297 | PCOS | PC (17:0_18:2) levels | MR Egger | 14 | 0.8163944537644 | 0.290455089127953 | 0.0157277363110736 | 2.26232818587679 | 1.28031031107023 | 3.99756900835567 |
| GCST90277297 | PCOS | PC (17:0_18:2) levels | Weighted median | 14 | 0.430708185323194 | 0.127516717286654 | 7.3105263548887e-4 | 1.5383465723431 | 1.19814606876237 | 1.97514329708085 |
| GCST90277297 | PCOS | PC (17:0_18:2) levels | Inverse variance weighted | 14 | 0.299896698007442 | 0.0961756150259947 | 0.00181947114712517 | 1.34971937167364 | 1.11783356211689 | 1.6297080746271 |
| GCST90277297 | PCOS | PC (17:0_18:2) levels | Simple mode | 14 | 0.497061611457545 | 0.251247306753984 | 0.0694750981393573 | 1.64388379767687 | 1.00462756447836 | 2.68990622576406 |
| GCST90277297 | PCOS | PC (17:0_18:2) levels | Weighted mode | 14 | 0.488575999029177 | 0.234462650493835 | 0.0574750733031632 | 1.62999345427627 | 1.02945465829304 | 2.58086030266637 |
| GCST90277298 | PCOS | PC (17:0_20:4) levels | MR Egger | 26 | 0.00938450799333478 | 0.0742190755463665 | 0.900434346179019 | 1.00942868055961 | 0.872768548682554 | 1.16748737414337 |
| GCST90277298 | PCOS | PC (17:0_20:4) levels | Weighted median | 26 | 0.00458652540315205 | 0.0555008332454387 | 0.934138703779313 | 1.00459705960977 | 0.901049478526428 | 1.12004421092064 |
| GCST90277298 | PCOS | PC (17:0_20:4) levels | Inverse variance weighted | 26 | 0.0161692966136626 | 0.0464679122167304 | 0.727865021688838 | 1.01630072711421 | 0.927829017708063 | 1.11320852034168 |
| GCST90277298 | PCOS | PC (17:0_20:4) levels | Simple mode | 26 | -0.152258724 | 0.152956243371243 | 0.329060331252361 | 0.858766068546819 | 0.636320468616939 | 1.15897444268969 |
| GCST90277298 | PCOS | PC (17:0_20:4) levels | Weighted mode | 26 | 0.00167017828400184 | 0.0557001082738725 | 0.976316963316672 | 1.00167157380857 | 0.898074695825375 | 1.11721880868051 |
| GCST90277299 | PCOS | PC (18:0_18:1) levels | MR Egger | 18 | 0.111050426338822 | 0.207467851690567 | 0.599827557532616 | 1.11745125440932 | 0.744095000858502 | 1.67814231319962 |
| GCST90277299 | PCOS | PC (18:0_18:1) levels | Weighted median | 18 | 0.249767836195681 | 0.12224839776493 | 0.0410408116946983 | 1.28372734706399 | 1.01021277458973 | 1.63129584484737 |
| GCST90277299 | PCOS | PC (18:0_18:1) levels | Inverse variance weighted | 18 | 0.224713473140993 | 0.0874951452470142 | 0.0102199706267148 | 1.25196394349899 | 1.05466479697587 | 1.48617240313313 |
| GCST90277299 | PCOS | PC (18:0_18:1) levels | Simple mode | 18 | 0.290451740874976 | 0.225392804693344 | 0.214782800215001 | 1.33703134333105 | 0.859574176189977 | 2.07969581051552 |
| GCST90277299 | PCOS | PC (18:0_18:1) levels | Weighted mode | 18 | 0.273352973202028 | 0.212563765430898 | 0.215690248389915 | 1.3143640982604 | 0.866518337746325 | 1.99367157917161 |
| GCST90277300 | PCOS | PC (18:0_18:2) levels | MR Egger | 21 | -0.0180744 | 0.19315117002515 | 0.926425357186577 | 0.98208796214225 | 0.672568917363692 | 1.43404897324918 |
| GCST90277300 | PCOS | PC (18:0_18:2) levels | Weighted median | 21 | -0.047190724 | 0.0964995543781805 | 0.624823779840155 | 0.953905447316836 | 0.789520207062845 | 1.15251717977663 |
| GCST90277300 | PCOS | PC (18:0_18:2) levels | Inverse variance weighted | 21 | 0.0121634512052097 | 0.0737203706075059 | 0.868948358955295 | 1.0122377268216 | 0.876053186080097 | 1.16959247666874 |
| GCST90277300 | PCOS | PC (18:0_18:2) levels | Simple mode | 21 | 0.0343968322381234 | 0.178181058870749 | 0.848871205665456 | 1.03499524472494 | 0.729907078149067 | 1.46760483446699 |
| GCST90277300 | PCOS | PC (18:0_18:2) levels | Weighted mode | 21 | -0.027828542 | 0.109614252619129 | 0.802182270683242 | 0.97255510499903 | 0.784528422807721 | 1.2056458437472 |
| GCST90277301 | PCOS | PC (18:0_18:3) levels | MR Egger | 13 | -0.267256289 | 0.289093472867701 | 0.375080249565084 | 0.765476863102855 | 0.434360912120555 | 1.34900450660984 |
| GCST90277301 | PCOS | PC (18:0_18:3) levels | Weighted median | 13 | 0.12044619345412 | 0.148050961738734 | 0.415905371317783 | 1.12800004554667 | 0.843889521581897 | 1.50776146665285 |
| GCST90277301 | PCOS | PC (18:0_18:3) levels | Inverse variance weighted | 13 | 0.186364675959016 | 0.12912867163045 | 0.14895066840209 | 1.20486156431742 | 0.935450057636859 | 1.55186412926917 |
| GCST90277301 | PCOS | PC (18:0_18:3) levels | Simple mode | 13 | -0.103482462 | 0.318647207390516 | 0.750957632583964 | 0.901691836564043 | 0.482858809284111 | 1.68382175595319 |
| GCST90277301 | PCOS | PC (18:0_18:3) levels | Weighted mode | 13 | -0.075426843 | 0.276094163299797 | 0.789350147826077 | 0.927347569563428 | 0.539791997437796 | 1.59315721399574 |
| GCST90277302 | PCOS | PC (18:0_20:2) levels | MR Egger | 8 | 0.0373571601551135 | 0.30565622989497 | 0.906715985482166 | 1.03806370963213 | 0.570222267922001 | 1.88974778060162 |
| GCST90277302 | PCOS | PC (18:0_20:2) levels | Weighted median | 8 | 0.00173177221564908 | 0.0989194789842286 | 0.986032238053054 | 1.00173327259914 | 0.825182746231688 | 1.21605735700929 |
| GCST90277302 | PCOS | PC (18:0_20:2) levels | Inverse variance weighted | 8 | -0.00802507 | 0.132549244409422 | 0.951722323797533 | 0.992007045235659 | 0.765044261459078 | 1.28630201855297 |
| GCST90277302 | PCOS | PC (18:0_20:2) levels | Simple mode | 8 | 0.185296528684414 | 0.237835275373134 | 0.46144485846065 | 1.20357528181309 | 0.755133585424599 | 1.91832741511152 |
| GCST90277302 | PCOS | PC (18:0_20:2) levels | Weighted mode | 8 | 0.0123472228018917 | 0.105489763739721 | 0.910110576153747 | 1.01242376445857 | 0.82331803915327 | 1.24496467962079 |
| GCST90277303 | PCOS | PC (18:0_20:3) levels | MR Egger | 16 | -0.093012915 | 0.253302781837157 | 0.718960566298575 | 0.911181732176986 | 0.554612078352168 | 1.49699615543868 |
| GCST90277303 | PCOS | PC (18:0_20:3) levels | Weighted median | 16 | 0.134982461500231 | 0.111726647535636 | 0.226989872129161 | 1.14451671106921 | 0.919429630845866 | 1.42470772962971 |
| GCST90277303 | PCOS | PC (18:0_20:3) levels | Inverse variance weighted | 16 | 0.117071942856435 | 0.0926417846525289 | 0.206335711305301 | 1.12420030496245 | 0.937530531192497 | 1.34803751305051 |
| GCST90277303 | PCOS | PC (18:0_20:3) levels | Simple mode | 16 | 0.276053861870265 | 0.185176791874265 | 0.156752610660667 | 1.31791884768962 | 0.916775506015086 | 1.89458605481871 |
| GCST90277303 | PCOS | PC (18:0_20:3) levels | Weighted mode | 16 | 0.118750747507454 | 0.138478068659335 | 0.404639167075666 | 1.12608920276467 | 0.858416155755762 | 1.4772285960377 |
| GCST90277304 | PCOS | PC (18:0_20:4) levels | MR Egger | 22 | 0.00961782979553448 | 0.0559139165755544 | 0.86515721113336 | 1.00966422975686 | 0.904861444781104 | 1.12660547394317 |
| GCST90277304 | PCOS | PC (18:0_20:4) levels | Weighted median | 22 | 0.00690448045511674 | 0.0447874895996333 | 0.877482857668864 | 1.00692837133334 | 0.922305284407049 | 1.09931577118509 |
| GCST90277304 | PCOS | PC (18:0_20:4) levels | Inverse variance weighted | 22 | 0.0127508100179867 | 0.038793469085006 | 0.742394209613146 | 1.0128324482114 | 0.938676486094716 | 1.09284677239309 |
| GCST90277304 | PCOS | PC (18:0_20:4) levels | Simple mode | 22 | -0.021936206 | 0.16168148708636 | 0.89337001080844 | 0.9783026429988 | 0.712602212785185 | 1.34307197497708 |
| GCST90277304 | PCOS | PC (18:0_20:4) levels | Weighted mode | 22 | 0.00646597358686907 | 0.0476647160499998 | 0.893385696419409 | 1.00648692312279 | 0.916716632887036 | 1.10504804873767 |
| GCST90277305 | PCOS | PC (18:0_20:5) levels | MR Egger | 14 | 0.0190926902862257 | 0.0996638852416665 | 0.851281690516894 | 1.01927612123441 | 0.838409591877316 | 1.23916021641925 |
| GCST90277305 | PCOS | PC (18:0_20:5) levels | Weighted median | 14 | 0.011962245330698 | 0.0692236576669186 | 0.862804125715233 | 1.0120340791328 | 0.883630647083885 | 1.15909625894738 |
| GCST90277305 | PCOS | PC (18:0_20:5) levels | Inverse variance weighted | 14 | 0.00701607389931994 | 0.0596153474279192 | 0.906314039392478 | 1.00704074420829 | 0.895986433719937 | 1.13185983886512 |
| GCST90277305 | PCOS | PC (18:0_20:5) levels | Simple mode | 14 | -5.34E-04 | 0.17073176771282 | 0.997553872723468 | 0.999466564560369 | 0.715218032306571 | 1.39668376432366 |
| GCST90277305 | PCOS | PC (18:0_20:5) levels | Weighted mode | 14 | 0.00853479175432881 | 0.0710490404952671 | 0.906220515180729 | 1.00857131692711 | 0.877462264823958 | 1.1592704804601 |
| GCST90277306 | PCOS | PC (18:0_22:5) levels | MR Egger | 18 | 0.161952407362793 | 0.157132643258625 | 0.31802338226704 | 1.1758042803628 | 0.864133875726296 | 1.59988601830648 |
| GCST90277306 | PCOS | PC (18:0_22:5) levels | Weighted median | 18 | 0.0470569369681312 | 0.0950953732208818 | 0.620713493452081 | 1.04818168766803 | 0.869940905333269 | 1.26294193505212 |
| GCST90277306 | PCOS | PC (18:0_22:5) levels | Inverse variance weighted | 18 | 0.151421048847951 | 0.0744546721303913 | 0.0419783534839685 | 1.16348643958861 | 1.00550498854102 | 1.34628938745574 |
| GCST90277306 | PCOS | PC (18:0_22:5) levels | Simple mode | 18 | 0.234889723396599 | 0.214935538591298 | 0.289710090765351 | 1.26476928658121 | 0.829954887363831 | 1.92738349111969 |
| GCST90277306 | PCOS | PC (18:0_22:5) levels | Weighted mode | 18 | 0.029513576971731 | 0.101754926241644 | 0.775289407161008 | 1.02995341902542 | 0.843727183902389 | 1.25728323752204 |
| GCST90277307 | PCOS | PC (18:0_22:6) levels | MR Egger | 13 | -0.139164143 | 0.272166888819978 | 0.619234589419041 | 0.870085198704016 | 0.510374124540118 | 1.48332020884868 |
| GCST90277307 | PCOS | PC (18:0_22:6) levels | Weighted median | 13 | -0.00998769 | 0.128989916983809 | 0.938281473140356 | 0.990062021620651 | 0.768889566052885 | 1.27485512865986 |
| GCST90277307 | PCOS | PC (18:0_22:6) levels | Inverse variance weighted | 13 | -0.055950019 | 0.0928784751653166 | 0.546907726163985 | 0.945586395970143 | 0.78820913040327 | 1.13438629134674 |
| GCST90277307 | PCOS | PC (18:0_22:6) levels | Simple mode | 13 | -0.198773628 | 0.207800710118168 | 0.35766480666451 | 0.819735437171805 | 0.545494246914314 | 1.2318483480923 |
| GCST90277307 | PCOS | PC (18:0_22:6) levels | Weighted mode | 13 | -0.005035483 | 0.157260945910841 | 0.974982578702568 | 0.994977173403298 | 0.731054740687124 | 1.3541798178658 |
| GCST90277308 | PCOS | PC (18:1_18:1) levels | MR Egger | 15 | -0.423692541 | 0.219828495262351 | 0.0760700168048318 | 0.65462512139055 | 0.425471892103657 | 1.00719708518651 |
| GCST90277308 | PCOS | PC (18:1_18:1) levels | Weighted median | 15 | 0.0221070375767315 | 0.117688267478247 | 0.850998924930708 | 1.02235320882411 | 0.811750731645662 | 1.28759487715399 |
| GCST90277308 | PCOS | PC (18:1_18:1) levels | Inverse variance weighted | 15 | 0.0492926095259951 | 0.0953424101153953 | 0.605151886636193 | 1.05052770018354 | 0.8714659247738 | 1.26638164210423 |
| GCST90277308 | PCOS | PC (18:1_18:1) levels | Simple mode | 15 | 0.0449045705739057 | 0.170522216406633 | 0.796128067988969 | 1.04592804283319 | 0.748773328395483 | 1.46101020068259 |
| GCST90277308 | PCOS | PC (18:1_18:1) levels | Weighted mode | 15 | -0.009496386 | 0.133349764456294 | 0.944234663007464 | 0.99054856258092 | 0.762721802687913 | 1.28642770060239 |
| GCST90277309 | PCOS | PC (18:1_18:2) levels | MR Egger | 15 | -0.044272348 | 0.143050769673327 | 0.761855897187386 | 0.9566933683829 | 0.722778940531256 | 1.26631000127796 |
| GCST90277309 | PCOS | PC (18:1_18:2) levels | Weighted median | 15 | -0.029770038 | 0.0758921756813002 | 0.694860532424995 | 0.970668724472203 | 0.836508411782534 | 1.12634584350532 |
| GCST90277309 | PCOS | PC (18:1_18:2) levels | Inverse variance weighted | 15 | -0.059409901 | 0.0749235116965569 | 0.427812379172091 | 0.942320431865797 | 0.813621520241687 | 1.09137697838667 |
| GCST90277309 | PCOS | PC (18:1_18:2) levels | Simple mode | 15 | -0.058039428 | 0.139225524921458 | 0.68309236097641 | 0.943612742159469 | 0.718261581522041 | 1.23966675939828 |
| GCST90277309 | PCOS | PC (18:1_18:2) levels | Weighted mode | 15 | -0.028394586 | 0.0783887232276535 | 0.722591108376998 | 0.972004751294846 | 0.833570927945558 | 1.13342872797678 |
| GCST90277310 | PCOS | PC (18:1_18:3) levels | MR Egger | 7 | -0.299162803 | 0.254684177887444 | 0.293029512982385 | 0.741438690970309 | 0.450073762977739 | 1.22142497005531 |
| GCST90277310 | PCOS | PC (18:1_18:3) levels | Weighted median | 7 | -0.151779695 | 0.182557791749557 | 0.405744150844236 | 0.859177540931792 | 0.600740050133988 | 1.22879446222531 |
| GCST90277310 | PCOS | PC (18:1_18:3) levels | Inverse variance weighted | 7 | -0.107664694 | 0.134896939349047 | 0.42479763582091 | 0.897928626882653 | 0.689311024781054 | 1.1696836260982 |
| GCST90277310 | PCOS | PC (18:1_18:3) levels | Simple mode | 7 | -0.168537086 | 0.252206301213495 | 0.528827736317449 | 0.844899928842232 | 0.515374511184019 | 1.38512067295994 |
| GCST90277310 | PCOS | PC (18:1_18:3) levels | Weighted mode | 7 | -0.140422522 | 0.255952518397853 | 0.603061428528523 | 0.868990990152348 | 0.526191818959425 | 1.43511418033694 |
| GCST90277311 | PCOS | PC (18:1_20:2) levels | MR Egger | 18 | -0.060105029 | 0.10228250852689 | 0.564977717121322 | 0.941665625727886 | 0.770605471730492 | 1.15069796829526 |
| GCST90277311 | PCOS | PC (18:1_20:2) levels | Weighted median | 18 | -0.017414369 | 0.068671725309629 | 0.79981338061723 | 0.982736384938024 | 0.85897887450395 | 1.12432427728654 |
| GCST90277311 | PCOS | PC (18:1_20:2) levels | Inverse variance weighted | 18 | -0.014746105 | 0.052996779060429 | 0.780824059711384 | 0.985362086443972 | 0.888145416687101 | 1.09322012269449 |
| GCST90277311 | PCOS | PC (18:1_20:2) levels | Simple mode | 18 | 0.0144503875272671 | 0.133419511301373 | 0.91501953785661 | 1.01455529910565 | 0.781100188825059 | 1.31778543862815 |
| GCST90277311 | PCOS | PC (18:1_20:2) levels | Weighted mode | 18 | -0.0136463 | 0.0727082028114966 | 0.853344893627251 | 0.986446388820353 | 0.855427121612057 | 1.13753288086418 |
| GCST90277312 | PCOS | PC (18:1_20:3) levels | MR Egger | 15 | -0.10771676 | 0.223333299470709 | 0.637602380922847 | 0.897881876762597 | 0.579580897792746 | 1.3909910897495 |
| GCST90277312 | PCOS | PC (18:1_20:3) levels | Weighted median | 15 | -0.03025814 | 0.116874720181067 | 0.795717182399269 | 0.970195054704966 | 0.771566363618459 | 1.21995785269799 |
| GCST90277312 | PCOS | PC (18:1_20:3) levels | Inverse variance weighted | 15 | -0.097333801 | 0.0833682510115557 | 0.243001885042717 | 0.90725311343517 | 0.770484629504603 | 1.06829932787503 |
| GCST90277312 | PCOS | PC (18:1_20:3) levels | Simple mode | 15 | -0.017491937 | 0.200813601982635 | 0.931821389910661 | 0.982660158394152 | 0.662929521194188 | 1.45659675127421 |
| GCST90277312 | PCOS | PC (18:1_20:3) levels | Weighted mode | 15 | 0.021499317255657 | 0.170088370066124 | 0.901212004988856 | 1.02173209275534 | 0.732073845649715 | 1.4259988600463 |
| GCST90277313 | PCOS | PC (18:1_20:4) levels | MR Egger | 18 | -0.015559063 | 0.0889397356106378 | 0.863321869184049 | 0.984561353713317 | 0.827057593445965 | 1.17205992292136 |
| GCST90277313 | PCOS | PC (18:1_20:4) levels | Weighted median | 18 | 0.0233493378635672 | 0.0583026299956717 | 0.688799214596538 | 1.02362406773943 | 0.9130872700429 | 1.1475422628619 |
| GCST90277313 | PCOS | PC (18:1_20:4) levels | Inverse variance weighted | 18 | 0.0922882704311995 | 0.0596011009862273 | 0.121518247389915 | 1.09668091719908 | 0.975768525199035 | 1.23257617261562 |
| GCST90277313 | PCOS | PC (18:1_20:4) levels | Simple mode | 18 | 0.505043455294129 | 0.239184014937914 | 0.0498343631678778 | 1.65705752681853 | 1.036907563 | 2.64810456231024 |
| GCST90277313 | PCOS | PC (18:1_20:4) levels | Weighted mode | 18 | 0.00848518874147686 | 0.0595647537229598 | 0.888396778613396 | 1.00852128999187 | 0.89739269239811 | 1.13341149419081 |
| GCST90277315 | PCOS | PC (18:2_20:1) levels | MR Egger | 10 | -0.201549917 | 0.2564380428005 | 0.454538523087027 | 0.817462771502902 | 0.494519605996667 | 1.3513021014534 |
| GCST90277315 | PCOS | PC (18:2_20:1) levels | Weighted median | 10 | 0.150328630811807 | 0.143427200819779 | 0.294584244300664 | 1.16221612000354 | 0.877403165186782 | 1.53948192027383 |
| GCST90277315 | PCOS | PC (18:2_20:1) levels | Inverse variance weighted | 10 | 0.0862584156416513 | 0.108153464031113 | 0.425128346327435 | 1.09008798769776 | 0.881859640089824 | 1.34748407445194 |
| GCST90277315 | PCOS | PC (18:2_20:1) levels | Simple mode | 10 | 0.19226943562737 | 0.270230358106628 | 0.494800285775937 | 1.2119970281557 | 0.713636131520774 | 2.05838344133154 |
| GCST90277315 | PCOS | PC (18:2_20:1) levels | Weighted mode | 10 | 0.15015132791518 | 0.248216005393185 | 0.560171407989134 | 1.16201007398577 | 0.714371572278096 | 1.89014717892327 |
| GCST90277316 | PCOS | PC (18:2_20:3) levels | MR Egger | 11 | -0.074005756 | 0.284374121488212 | 0.80053405602521 | 0.928666348702136 | 0.531857845094685 | 1.62152574257549 |
| GCST90277316 | PCOS | PC (18:2_20:3) levels | Weighted median | 11 | -0.041493549 | 0.127616305469888 | 0.745072840746138 | 0.959355523818544 | 0.747051235357019 | 1.23199451057906 |
| GCST90277316 | PCOS | PC (18:2_20:3) levels | Inverse variance weighted | 11 | -0.004278113 | 0.103015632683592 | 0.966874353249087 | 0.995731025025758 | 0.813679477244068 | 1.21851454034086 |
| GCST90277316 | PCOS | PC (18:2_20:3) levels | Simple mode | 11 | -0.137581859 | 0.189652967685829 | 0.484812458824421 | 0.871463010203845 | 0.60091506609016 | 1.26381883399076 |
| GCST90277316 | PCOS | PC (18:2_20:3) levels | Weighted mode | 11 | -0.073208163 | 0.143247132660648 | 0.620400620724555 | 0.929407341525961 | 0.701894238883638 | 1.23066689912746 |
| GCST90277317 | PCOS | PC (18:2_20:4) levels | MR Egger | 22 | -0.083279473 | 0.192187172015379 | 0.669416405811843 | 0.920093969563222 | 0.631304900884844 | 1.34098897638849 |
| GCST90277317 | PCOS | PC (18:2_20:4) levels | Weighted median | 22 | 0.0272505446952179 | 0.101211396770951 | 0.787742049189834 | 1.0276252365645 | 0.84271724453866 | 1.25310551512726 |
| GCST90277317 | PCOS | PC (18:2_20:4) levels | Inverse variance weighted | 22 | 0.0057449346543484 | 0.071478426936564 | 0.935940610909533 | 1.00576146843811 | 0.874281579264827 | 1.15701411923306 |
| GCST90277317 | PCOS | PC (18:2_20:4) levels | Simple mode | 22 | -0.070183617 | 0.169445725453874 | 0.682931172396078 | 0.932222632183236 | 0.668781928085949 | 1.2994355849923 |
| GCST90277317 | PCOS | PC (18:2_20:4) levels | Weighted mode | 22 | -0.023539861 | 0.141571284310484 | 0.869530522559859 | 0.976735040744768 | 0.740063283831219 | 1.28909427161402 |
| GCST90277318 | PCOS | PC (O-16:0_16:0) levels | MR Egger | 7 | 0.163907482008439 | 0.354805654124679 | 0.663510921124749 | 1.17810531411301 | 0.587715906484778 | 2.36156979218542 |
| GCST90277318 | PCOS | PC (O-16:0_16:0) levels | Weighted median | 7 | 0.377832645080089 | 0.176614938436704 | 0.0324112388915534 | 1.45911873174291 | 1.03217411172849 | 2.06266311965308 |
| GCST90277318 | PCOS | PC (O-16:0_16:0) levels | Inverse variance weighted | 7 | 0.345470787421365 | 0.141911119869553 | 0.0149158163013268 | 1.41265482326278 | 1.06964304763641 | 1.86566317997134 |
| GCST90277318 | PCOS | PC (O-16:0_16:0) levels | Simple mode | 7 | 0.462960758645168 | 0.250333268933983 | 0.113888313884884 | 1.58877099566642 | 0.972687472328472 | 2.59507123149052 |
| GCST90277318 | PCOS | PC (O-16:0_16:0) levels | Weighted mode | 7 | 0.456780706410609 | 0.246536984043869 | 0.113351290896831 | 1.57898258552152 | 0.973914479760289 | 2.55996399806467 |
| GCST90277319 | PCOS | PC (O-16:0_16:1) levels | MR Egger | 11 | -0.074119975 | 0.313058337669496 | 0.818143224452944 | 0.928560283533836 | 0.502723824461342 | 1.71510510980913 |
| GCST90277319 | PCOS | PC (O-16:0_16:1) levels | Weighted median | 11 | -0.053280156 | 0.124193077503194 | 0.667915457077376 | 0.948114355496903 | 0.74326800868765 | 1.20941681949488 |
| GCST90277319 | PCOS | PC (O-16:0_16:1) levels | Inverse variance weighted | 11 | 0.0110168155272314 | 0.0961831648243809 | 0.908809773995061 | 1.01107772410678 | 0.83735916758666 | 1.22083593726122 |
| GCST90277319 | PCOS | PC (O-16:0_16:1) levels | Simple mode | 11 | -0.149445714 | 0.209433106217031 | 0.491809225041263 | 0.861185187006847 | 0.571246420866281 | 1.29828371650073 |
| GCST90277319 | PCOS | PC (O-16:0_16:1) levels | Weighted mode | 11 | -0.149445714 | 0.221200767691823 | 0.514606559469636 | 0.861185187006847 | 0.558221624614627 | 1.32857613108775 |
| GCST90277320 | PCOS | PC (O-16:0_18:1) levels | MR Egger | 16 | -0.179357037 | 0.229494204818561 | 0.447505606744848 | 0.835807431847396 | 0.53303633918579 | 1.31055616995721 |
| GCST90277320 | PCOS | PC (O-16:0_18:1) levels | Weighted median | 16 | 0.0285030867422395 | 0.119563465700216 | 0.811576338537614 | 1.02891318681942 | 0.813962236932802 | 1.30062833135868 |
| GCST90277320 | PCOS | PC (O-16:0_18:1) levels | Inverse variance weighted | 16 | 0.0434834749063429 | 0.0877735035545046 | 0.620313925266148 | 1.04444273465541 | 0.879367313463323 | 1.24050622450156 |
| GCST90277320 | PCOS | PC (O-16:0_18:1) levels | Simple mode | 16 | 0.0290066118404819 | 0.202297333179551 | 0.887893806189226 | 1.02943140088884 | 0.692465985047893 | 1.53036976836149 |
| GCST90277320 | PCOS | PC (O-16:0_18:1) levels | Weighted mode | 16 | 0.0191560781544033 | 0.216151246288447 | 0.930553551125274 | 1.0193407330226 | 0.667310139367964 | 1.55708038691453 |
| GCST90277321 | PCOS | PC (O-16:0_18:2) levels | MR Egger | 5 | 0.0246956797601155 | 0.393805093093473 | 0.953941488892279 | 1.02500314385381 | 0.473708889703095 | 2.21788416419352 |
| GCST90277321 | PCOS | PC (O-16:0_18:2) levels | Weighted median | 5 | -0.041582987 | 0.152605337658638 | 0.785247502764468 | 0.959269725013352 | 0.711279762607174 | 1.29372218036154 |
| GCST90277321 | PCOS | PC (O-16:0_18:2) levels | Inverse variance weighted | 5 | -0.089318994 | 0.126933258132574 | 0.481638952624214 | 0.914553789660131 | 0.713118138486979 | 1.17288929987998 |
| GCST90277321 | PCOS | PC (O-16:0_18:2) levels | Simple mode | 5 | 0.0854036835773486 | 0.222796917129848 | 0.720980263944316 | 1.08915665261944 | 0.703787880736966 | 1.6855394166535 |
| GCST90277321 | PCOS | PC (O-16:0_18:2) levels | Weighted mode | 5 | -0.015382514 | 0.166065784686929 | 0.930652125930824 | 0.984735192820249 | 0.711150319483628 | 1.36357022335706 |
| GCST90277322 | PCOS | PC (O-16:0_20:3) levels | MR Egger | 7 | 0.193341997597978 | 0.224338638744047 | 0.428168791049086 | 1.21329766746003 | 0.781639427957007 | 1.88333799090919 |
| GCST90277322 | PCOS | PC (O-16:0_20:3) levels | Weighted median | 7 | 0.115907843909196 | 0.129435138357852 | 0.37052532522606 | 1.1228923859922 | 0.871285974337356 | 1.44715667146853 |
| GCST90277322 | PCOS | PC (O-16:0_20:3) levels | Inverse variance weighted | 7 | 0.155611308877892 | 0.102892090785835 | 0.130438780027189 | 1.16837197900359 | 0.954987345798141 | 1.42943577977976 |
| GCST90277322 | PCOS | PC (O-16:0_20:3) levels | Simple mode | 7 | 0.124374753052475 | 0.198079889043529 | 0.553200254960422 | 1.13244017690228 | 0.76807965829659 | 1.66964551190766 |
| GCST90277322 | PCOS | PC (O-16:0_20:3) levels | Weighted mode | 7 | 0.0685632375632195 | 0.156094036866022 | 0.675862613788009 | 1.07096834823826 | 0.788690680684377 | 1.45427508022905 |
| GCST90277323 | PCOS | PC (O-16:0_20:4) levels | MR Egger | 18 | 0.021564046901651 | 0.104716219629541 | 0.839444221387782 | 1.02179823125254 | 0.832202279283285 | 1.25458875970636 |
| GCST90277323 | PCOS | PC (O-16:0_20:4) levels | Weighted median | 18 | 0.0115448857739621 | 0.0762801834537758 | 0.879700870034172 | 1.01161178516848 | 0.871129813351778 | 1.17474845678195 |
| GCST90277323 | PCOS | PC (O-16:0_20:4) levels | Inverse variance weighted | 18 | -0.020728025 | 0.0597096332429929 | 0.728480826181239 | 0.979485324094216 | 0.871308733798451 | 1.10109248639516 |
| GCST90277323 | PCOS | PC (O-16:0_20:4) levels | Simple mode | 18 | 0.0382056846088095 | 0.159120959063291 | 0.813120484878078 | 1.03894490587966 | 0.760581965119699 | 1.41918500168936 |
| GCST90277323 | PCOS | PC (O-16:0_20:4) levels | Weighted mode | 18 | 0.0196692379982701 | 0.0763413529159255 | 0.799771084009595 | 1.01986395199001 | 0.878130719021143 | 1.18447340246576 |
| GCST90277324 | PCOS | PC (O-16:0_22:5) levels | MR Egger | 10 | 0.125343156429374 | 0.20781857654995 | 0.563121632490965 | 1.13353736696927 | 0.754287824575393 | 1.70347037357911 |
| GCST90277324 | PCOS | PC (O-16:0_22:5) levels | Weighted median | 10 | 0.0491558678835075 | 0.125184953642406 | 0.694566227793804 | 1.05038405912142 | 0.82184239058689 | 1.34247963392167 |
| GCST90277324 | PCOS | PC (O-16:0_22:5) levels | Inverse variance weighted | 10 | 0.114932439615427 | 0.0983238056947329 | 0.242436779967212 | 1.12179764593134 | 0.925165887652405 | 1.36022088061455 |
| GCST90277324 | PCOS | PC (O-16:0_22:5) levels | Simple mode | 10 | -0.010177087 | 0.196551209302592 | 0.959836367670229 | 0.989874524811105 | 0.673398865672804 | 1.45508349481852 |
| GCST90277324 | PCOS | PC (O-16:0_22:5) levels | Weighted mode | 10 | 0.016492026993807 | 0.165365834708945 | 0.922744398917774 | 1.01662877116625 | 0.735190956290532 | 1.40580355283176 |
| GCST90277325 | PCOS | PC (O-16:1_16:0) levels | MR Egger | 9 | -0.467996593 | 0.254203696071133 | 0.108181430104989 | 0.626255657482649 | 0.380512657414236 | 1.03070460571321 |
| GCST90277325 | PCOS | PC (O-16:1_16:0) levels | Weighted median | 9 | -0.18709007 | 0.125570215296414 | 0.136244236726454 | 0.829369032088066 | 0.648425805241226 | 1.06080446803131 |
| GCST90277325 | PCOS | PC (O-16:1_16:0) levels | Inverse variance weighted | 9 | -0.124989142 | 0.0984323163711744 | 0.204156651509183 | 0.882506484443062 | 0.727663558533881 | 1.07029915948139 |
| GCST90277325 | PCOS | PC (O-16:1_16:0) levels | Simple mode | 9 | -0.179766525 | 0.201234618281491 | 0.397762731345962 | 0.835465248782291 | 0.563162884752674 | 1.23943214444858 |
| GCST90277325 | PCOS | PC (O-16:1_16:0) levels | Weighted mode | 9 | -0.222787729 | 0.154732191052447 | 0.187875398485067 | 0.80028470842574 | 0.590926979380591 | 1.0838151529507 |
| GCST90277326 | PCOS | PC (O-16:1_18:0) levels | MR Egger | 8 | -0.370355202 | 0.564280754967222 | 0.535955168742948 | 0.690489023763595 | 0.228471116359868 | 2.08680685565097 |
| GCST90277326 | PCOS | PC (O-16:1_18:0) levels | Weighted median | 8 | -0.003913998 | 0.181096945598448 | 0.982756884526867 | 0.996093651610663 | 0.698469328711279 | 1.42053848607747 |
| GCST90277326 | PCOS | PC (O-16:1_18:0) levels | Inverse variance weighted | 8 | -0.125127592 | 0.181565753106653 | 0.490723494183284 | 0.882384310018069 | 0.618167100866735 | 1.25953333568607 |
| GCST90277326 | PCOS | PC (O-16:1_18:0) levels | Simple mode | 8 | 0.101070784298146 | 0.274739187331228 | 0.723835297848672 | 1.10635495155059 | 0.645701457009912 | 1.89564583683711 |
| GCST90277326 | PCOS | PC (O-16:1_18:0) levels | Weighted mode | 8 | 0.0259392312194757 | 0.288426205888148 | 0.93085909800165 | 1.02627858088062 | 0.583111923603036 | 1.80625311015139 |
| GCST90277327 | PCOS | PC (O-16:1_18:1) levels | MR Egger | 15 | -0.560436169 | 0.272514261115437 | 0.0603802045525776 | 0.570959974237773 | 0.334685457446437 | 0.9740348286085 |
| GCST90277327 | PCOS | PC (O-16:1_18:1) levels | Weighted median | 15 | -0.287674162 | 0.132173109345655 | 0.029518238836358 | 0.7500059330727 | 0.578837523771416 | 0.971790660666269 |
| GCST90277327 | PCOS | PC (O-16:1_18:1) levels | Inverse variance weighted | 15 | -0.168064073 | 0.108035221858131 | 0.119793367860506 | 0.845299671997587 | 0.68398922943745 | 1.04465319734186 |
| GCST90277327 | PCOS | PC (O-16:1_18:1) levels | Simple mode | 15 | -0.368235148 | 0.237872477277321 | 0.143917112257334 | 0.691954450830308 | 0.434106578046416 | 1.10295716821107 |
| GCST90277327 | PCOS | PC (O-16:1_18:1) levels | Weighted mode | 15 | -0.382244085 | 0.23603024551510501 | 0.127645458702092 | 0.682328486747557 | 0.429616054282092 | 1.08369358916348 |
| GCST90277328 | PCOS | PC (O-16:1_18:2) levels | MR Egger | 18 | 0.0453911341789531 | 0.220162181037429 | 0.839257653575537 | 1.04643707718108 | 0.679684376578462 | 1.61108684300156 |
| GCST90277328 | PCOS | PC (O-16:1_18:2) levels | Weighted median | 18 | 0.0658218155470906 | 0.121376654617564 | 0.587616079048076 | 1.06803639272974 | 0.841914825261441 | 1.35488971326873 |
| GCST90277328 | PCOS | PC (O-16:1_18:2) levels | Inverse variance weighted | 18 | -0.024464237 | 0.0922029030300593 | 0.790754915968369 | 0.975832587056255 | 0.81449912365036 | 1.16912248314422 |
| GCST90277328 | PCOS | PC (O-16:1_18:2) levels | Simple mode | 18 | 0.0787711537858171 | 0.236132584114036 | 0.742769316873226 | 1.08195669204391 | 0.681098249341749 | 1.71873923415597 |
| GCST90277328 | PCOS | PC (O-16:1_18:2) levels | Weighted mode | 18 | 0.118540935816919 | 0.240858508329176 | 0.628901381386744 | 1.12585296086936 | 0.702196681929945 | 1.80511375532927 |
| GCST90277329 | PCOS | PC (O-16:1_20:3) levels | MR Egger | 18 | 0.0993171851398467 | 0.248767563742899 | 0.694997007502654 | 1.10441654852645 | 0.678231068710692 | 1.79840760609476 |
| GCST90277329 | PCOS | PC (O-16:1_20:3) levels | Weighted median | 18 | -0.017895534 | 0.113321372971798 | 0.874521070969217 | 0.982263640229859 | 0.786623593664784 | 1.22656104735243 |
| GCST90277329 | PCOS | PC (O-16:1_20:3) levels | Inverse variance weighted | 18 | -0.047784498 | 0.0855269667786315 | 0.576361834741967 | 0.953339211162674 | 0.806204897770858 | 1.12732588707069 |
| GCST90277329 | PCOS | PC (O-16:1_20:3) levels | Simple mode | 18 | 0.0104705979317155 | 0.218154912446548 | 0.962278668233002 | 1.01052560646535 | 0.6589464347137 | 1.54968893908021 |
| GCST90277329 | PCOS | PC (O-16:1_20:3) levels | Weighted mode | 18 | 0.025081999829041 | 0.161931734358264 | 0.878730273323603 | 1.02539919963621 | 0.746541403896758 | 1.40841956404068 |
| GCST90277330 | PCOS | PC (O-16:1_20:4) levels | MR Egger | 11 | -0.048614112 | 0.133031160697741 | 0.723228382881251 | 0.952548636208395 | 0.733920045148508 | 1.2363048404801 |
| GCST90277330 | PCOS | PC (O-16:1_20:4) levels | Weighted median | 11 | 0.0118500736325227 | 0.0759304436941407 | 0.875981901063467 | 1.01192056391825 | 0.871993249930949 | 1.1743017824527 |
| GCST90277330 | PCOS | PC (O-16:1_20:4) levels | Inverse variance weighted | 11 | 0.013948539793159 | 0.0673395495533321 | 0.835902547714575 | 1.01404627456476 | 0.888663191613751 | 1.15711988148329 |
| GCST90277330 | PCOS | PC (O-16:1_20:4) levels | Simple mode | 11 | 0.122118669172368 | 0.174136638684396 | 0.499121816844259 | 1.12988817671968 | 0.803169790124305 | 1.58951109415275 |
| GCST90277330 | PCOS | PC (O-16:1_20:4) levels | Weighted mode | 11 | 0.0167742648028374 | 0.0794520054805038 | 0.837030432307558 | 1.01691574273843 | 0.870270091129428 | 1.18827205297518 |
| GCST90277331 | PCOS | PC (O-16:2_18:0) levels | MR Egger | 9 | 0.154204425556555 | 0.260290109899193 | 0.57219274145646 | 1.16672937170256 | 0.700497704716889 | 1.9432717875123 |
| GCST90277331 | PCOS | PC (O-16:2_18:0) levels | Weighted median | 9 | -0.006218179 | 0.119874565256361 | 0.958630381856148 | 0.993801113812114 | 0.785706216360564 | 1.25701010536611 |
| GCST90277331 | PCOS | PC (O-16:2_18:0) levels | Inverse variance weighted | 9 | 0.00241541119192053 | 0.0949798245817439 | 0.979711358737307 | 1.00241833064762 | 0.83214793707034 | 1.20752869154013 |
| GCST90277331 | PCOS | PC (O-16:2_18:0) levels | Simple mode | 9 | 0.0415373853036556 | 0.180256587471155 | 0.823537351838993 | 1.0424121320171 | 0.732153178885836 | 1.4841471488658 |
| GCST90277331 | PCOS | PC (O-16:2_18:0) levels | Weighted mode | 9 | 0.0257517198970371 | 0.136369125209234 | 0.85492216694831 | 1.02608616006783 | 0.785423854001023 | 1.34048998196251 |
| GCST90277332 | PCOS | PC (O-17:0_15:0) levels | MR Egger | 10 | -0.096784592 | 0.179753572612863 | 0.604933979753083 | 0.907751521561161 | 0.638201257457767 | 1.29114885824419 |
| GCST90277332 | PCOS | PC (O-17:0_15:0) levels | Weighted median | 10 | -0.188225328 | 0.144046278392573 | 0.191314487444006 | 0.828428018486418 | 0.624654842826884 | 1.09867551607781 |
| GCST90277332 | PCOS | PC (O-17:0_15:0) levels | Inverse variance weighted | 10 | -0.127791934 | 0.110166093948714 | 0.246051523247408 | 0.880036465967522 | 0.709129244428583 | 1.09213403271313 |
| GCST90277332 | PCOS | PC (O-17:0_15:0) levels | Simple mode | 10 | -0.292155704 | 0.248793945915064 | 0.270414801283321 | 0.746652269811371 | 0.45850144372818 | 1.21589499802094 |
| GCST90277332 | PCOS | PC (O-17:0_15:0) levels | Weighted mode | 10 | -0.284946746 | 0.249847312469056 | 0.283524417397644 | 0.752054303128444 | 0.460866217629411 | 1.22722311425483 |
| GCST90277333 | PCOS | PC (O-17:0_17:1) levels | MR Egger | 15 | 0.511801432296633 | 0.407545304362697 | 0.231285073952485 | 1.66829380797781 | 0.750521212172368 | 3.70836184853613 |
| GCST90277333 | PCOS | PC (O-17:0_17:1) levels | Weighted median | 15 | 0.211536773107165 | 0.129786612559443 | 0.10312658611337 | 1.23557540073992 | 0.958059889806794 | 1.59347717940836 |
| GCST90277333 | PCOS | PC (O-17:0_17:1) levels | Inverse variance weighted | 15 | 0.20924672298291 | 0.0926546686062532 | 0.0239238122859866 | 1.23274910855049 | 1.0280292012499 | 1.47823657419884 |
| GCST90277333 | PCOS | PC (O-17:0_17:1) levels | Simple mode | 15 | 0.23810775931301 | 0.260178662625498 | 0.375596344750963 | 1.26884591542237 | 0.761974323975838 | 2.11289266111163 |
| GCST90277333 | PCOS | PC (O-17:0_17:1) levels | Weighted mode | 15 | 0.295292986925543 | 0.255662854373791 | 0.267420385783583 | 1.34351993480224 | 0.813990806192583 | 2.21752604756564 |
| GCST90277334 | PCOS | PC (O-18:0_14:0) levels | MR Egger | 10 | 0.140165616080683 | 0.211218534946775 | 0.525601130268036 | 1.15046431847163 | 0.760466884647969 | 1.74046782942966 |
| GCST90277334 | PCOS | PC (O-18:0_14:0) levels | Weighted median | 10 | 0.00319752997358505 | 0.143883282896152 | 0.98227000547695 | 1.00320264752561 | 0.75668085632147 | 1.33003966413922 |
| GCST90277334 | PCOS | PC (O-18:0_14:0) levels | Inverse variance weighted | 10 | 0.015727693223915 | 0.110088720507109 | 0.886397746688976 | 1.01585202434973 | 0.818692929434181 | 1.26049132498147 |
| GCST90277334 | PCOS | PC (O-18:0_14:0) levels | Simple mode | 10 | 0.0177877277736488 | 0.231013300688694 | 0.940309150091304 | 1.01794687160534 | 0.647265740518059 | 1.60091252872697 |
| GCST90277334 | PCOS | PC (O-18:0_14:0) levels | Weighted mode | 10 | 0.0177877277736488 | 0.218068173368147 | 0.93677421218731 | 1.01794687160534 | 0.663898573432535 | 1.56080442838367 |
| GCST90277335 | PCOS | PC (O-18:0_16:1) levels | MR Egger | 9 | -0.051634514 | 0.299726899821392 | 0.868098699016837 | 0.949675896978388 | 0.52776760335903 | 1.70886637141343 |
| GCST90277335 | PCOS | PC (O-18:0_16:1) levels | Weighted median | 9 | -0.074102867 | 0.142143399082433 | 0.602140588180175 | 0.92857616933345 | 0.702785236953348 | 1.22690924185025 |
| GCST90277335 | PCOS | PC (O-18:0_16:1) levels | Inverse variance weighted | 9 | -0.053211096 | 0.109660627121291 | 0.627510165800473 | 0.948179834581012 | 0.764796170116539 | 1.1755354352377 |
| GCST90277335 | PCOS | PC (O-18:0_16:1) levels | Simple mode | 9 | -0.057474665 | 0.208787525227123 | 0.790078708177314 | 0.944145810204392 | 0.62706930244167 | 1.42155150548041 |
| GCST90277335 | PCOS | PC (O-18:0_16:1) levels | Weighted mode | 9 | -0.075224948 | 0.209396633314228 | 0.728708359429789 | 0.92753481546654 | 0.615301830905349 | 1.39820944890848 |
| GCST90277336 | PCOS | PC (O-18:0_20:4) levels | MR Egger | 12 | -0.045361866 | 0.148966884055851 | 0.766982286788994 | 0.955651601525117 | 0.713668322665848 | 1.27968406960544 |
| GCST90277336 | PCOS | PC (O-18:0_20:4) levels | Weighted median | 12 | 0.027291556821552 | 0.0901996333702228 | 0.762218815708774 | 1.02766738252477 | 0.861138675190965 | 1.2263997420289 |
| GCST90277336 | PCOS | PC (O-18:0_20:4) levels | Inverse variance weighted | 12 | 0.10738743087391 | 0.0732013308556965 | 0.142372047420374 | 1.11336552310814 | 0.964556202119829 | 1.28513277434907 |
| GCST90277336 | PCOS | PC (O-18:0_20:4) levels | Simple mode | 12 | -0.032090923 | 0.189188222100355 | 0.868384851914393 | 0.968418527007631 | 0.668379042250914 | 1.40314759166186 |
| GCST90277336 | PCOS | PC (O-18:0_20:4) levels | Weighted mode | 12 | 0.0087326780490784 | 0.0946613647367808 | 0.928156670212495 | 1.00877091911662 | 0.837944343283639 | 1.21442286162786 |
| GCST90277337 | PCOS | PC (O-18:1_16:0) levels | MR Egger | 21 | -0.089930146 | 0.236730800565697 | 0.708244873669142 | 0.913995029310382 | 0.574691148783373 | 1.45362759696684 |
| GCST90277337 | PCOS | PC (O-18:1_16:0) levels | Weighted median | 21 | -0.032285004 | 0.108389218533849 | 0.765808670002602 | 0.968230593059754 | 0.782917562709486 | 1.197406376 |
| GCST90277337 | PCOS | PC (O-18:1_16:0) levels | Inverse variance weighted | 21 | -0.081527934 | 0.0776473390176402 | 0.293728606562779 | 0.921706962770351 | 0.791586026038437 | 1.07321718331861 |
| GCST90277337 | PCOS | PC (O-18:1_16:0) levels | Simple mode | 21 | -0.075793405 | 0.209813639927815 | 0.721706837043238 | 0.927007701486275 | 0.614449742244518 | 1.39855747270034 |
| GCST90277337 | PCOS | PC (O-18:1_16:0) levels | Weighted mode | 21 | -0.02610475 | 0.220616968909645 | 0.906989617724974 | 0.97423303297858 | 0.632222424375526 | 1.50125962944788 |
| GCST90277338 | PCOS | PC (O-18:1_18:2) levels | MR Egger | 12 | 0.0971599138821088 | 0.250654926667754 | 0.706416759870132 | 1.10203659048028 | 0.674270615222754 | 1.80118281790493 |
| GCST90277338 | PCOS | PC (O-18:1_18:2) levels | Weighted median | 12 | -0.027504599 | 0.12173264394524 | 0.8212460099376 | 0.972870208700964 | 0.76636204236774 | 1.23502521086984 |
| GCST90277338 | PCOS | PC (O-18:1_18:2) levels | Inverse variance weighted | 12 | 0.0431602885918582 | 0.0993333709571092 | 0.663925841304735 | 1.04410523959713 | 0.859389420126793 | 1.26852358875136 |
| GCST90277338 | PCOS | PC (O-18:1_18:2) levels | Simple mode | 12 | -0.029940284 | 0.187379844084665 | 0.875947537417006 | 0.970503486162924 | 0.672196360071354 | 1.40119327119595 |
| GCST90277338 | PCOS | PC (O-18:1_18:2) levels | Weighted mode | 12 | -0.029940284 | 0.120691680566229 | 0.808648374049552 | 0.970503486162924 | 0.766059084688178 | 1.22950962331812 |
| GCST90277339 | PCOS | PC (O-18:1_20:3) levels | MR Egger | 11 | -0.104321942 | 0.200711581114552 | 0.615771183834453 | 0.900935201644005 | 0.607917169173552 | 1.3351888690112 |
| GCST90277339 | PCOS | PC (O-18:1_20:3) levels | Weighted median | 11 | -0.024687867 | 0.104142999313276 | 0.812612272312775 | 0.975614385917814 | 0.795481135350391 | 1.19653802926519 |
| GCST90277339 | PCOS | PC (O-18:1_20:3) levels | Inverse variance weighted | 11 | -0.046064123 | 0.0906371802800363 | 0.611295234659287 | 0.954980723956548 | 0.799544573619688 | 1.14063457275413 |
| GCST90277339 | PCOS | PC (O-18:1_20:3) levels | Simple mode | 11 | -0.016213215 | 0.159358421054787 | 0.920973738640735 | 0.983917511252989 | 0.719962810248541 | 1.34464399434198 |
| GCST90277339 | PCOS | PC (O-18:1_20:3) levels | Weighted mode | 11 | -0.026986202 | 0.110288132368602 | 0.811645577897143 | 0.97337467168513 | 0.784153143333398 | 1.20825665181999 |
| GCST90277340 | PCOS | PC (O-18:1_20:4) levels | MR Egger | 9 | 0.0395936137636238 | 0.277117835390566 | 0.890413473201803 | 1.04038788895227 | 0.604376854934093 | 1.7909470732406 |
| GCST90277340 | PCOS | PC (O-18:1_20:4) levels | Weighted median | 9 | 0.0208097904889146 | 0.100152295020327 | 0.835399606287133 | 1.02102782396294 | 0.83904687184623 | 1.24247864128567 |
| GCST90277340 | PCOS | PC (O-18:1_20:4) levels | Inverse variance weighted | 9 | -0.01064664 | 0.125062587877554 | 0.932157645607715 | 0.989409834674686 | 0.774320574315269 | 1.26424617067248 |
| GCST90277340 | PCOS | PC (O-18:1_20:4) levels | Simple mode | 9 | -0.01071883 | 0.195022396841842 | 0.957516521261581 | 0.989338411639014 | 0.675053907640184 | 1.44994419211054 |
| GCST90277340 | PCOS | PC (O-18:1_20:4) levels | Weighted mode | 9 | 0.0250710420635194 | 0.102227947047062 | 0.812439648180917 | 1.02538796361378 | 0.839208801367067 | 1.25287112600732 |
| GCST90277341 | PCOS | PC (O-18:2_16:0) levels | MR Egger | 13 | 0.0526229985074908 | 0.197577812791493 | 0.794903292864094 | 1.05403219849309 | 0.715603157795009 | 1.55251393647208 |
| GCST90277341 | PCOS | PC (O-18:2_16:0) levels | Weighted median | 13 | 0.052888416930303 | 0.129726091113457 | 0.683499090458309 | 1.05431199518677 | 0.817605999473209 | 1.35954699930149 |
| GCST90277341 | PCOS | PC (O-18:2_16:0) levels | Inverse variance weighted | 13 | 0.0307582460277546 | 0.0940229491577382 | 0.743565390135505 | 1.03123616830879 | 0.857677834457429 | 1.23991549286212 |
| GCST90277341 | PCOS | PC (O-18:2_16:0) levels | Simple mode | 13 | 0.0618734982245652 | 0.219928257496193 | 0.783245925068397 | 1.06382776011521 | 0.691296895767834 | 1.63711063961123 |
| GCST90277341 | PCOS | PC (O-18:2_16:0) levels | Weighted mode | 13 | 0.0212178673774368 | 0.176295679965502 | 0.906194464087252 | 1.02144456684622 | 0.723017635246745 | 1.44304779341046 |
| GCST90277342 | PCOS | PC (O-18:2_18:1) levels | MR Egger | 8 | -0.104460248 | 0.34176430683007 | 0.770197987106032 | 0.900810605984203 | 0.461017954867626 | 1.7601478191595 |
| GCST90277342 | PCOS | PC (O-18:2_18:1) levels | Weighted median | 8 | -0.056987372 | 0.150222282765094 | 0.704425261046082 | 0.944605997765994 | 0.703685999169075 | 1.26800944180943 |
| GCST90277342 | PCOS | PC (O-18:2_18:1) levels | Inverse variance weighted | 8 | -0.084674119 | 0.115798018521184 | 0.464643245221101 | 0.918811658668427 | 0.732246381040264 | 1.15291094085804 |
| GCST90277342 | PCOS | PC (O-18:2_18:1) levels | Simple mode | 8 | -0.109548004 | 0.229105502112664 | 0.647111690154857 | 0.896239139958893 | 0.57201229762833 | 1.40424357889622 |
| GCST90277342 | PCOS | PC (O-18:2_18:1) levels | Weighted mode | 8 | -0.062106642 | 0.196599254745428 | 0.761285534641373 | 0.939782660958718 | 0.639261815566464 | 1.38158017315023 |
| GCST90277343 | PCOS | PC (O-18:2_18:2) levels | MR Egger | 11 | -0.280793659 | 0.271109377258582 | 0.32735847858323 | 0.755184144989653 | 0.443894641667426 | 1.28477129325439 |
| GCST90277343 | PCOS | PC (O-18:2_18:2) levels | Weighted median | 11 | -0.031933066 | 0.135418844562928 | 0.813580405482654 | 0.96857141042515 | 0.742781020456168 | 1.26299750701334 |
| GCST90277343 | PCOS | PC (O-18:2_18:2) levels | Inverse variance weighted | 11 | 0.0937308015701671 | 0.100291066348598 | 0.350000796936775 | 1.09826405516002 | 0.90227160642696 | 1.33683020308385 |
| GCST90277343 | PCOS | PC (O-18:2_18:2) levels | Simple mode | 11 | -0.062784548 | 0.212562959880658 | 0.773753687039162 | 0.939145792524206 | 0.619149851238688 | 1.42452561015944 |
| GCST90277343 | PCOS | PC (O-18:2_18:2) levels | Weighted mode | 11 | -0.052969473 | 0.174507767739782 | 0.767702315117135 | 0.948408963758209 | 0.673676874204857 | 1.33517951554828 |
| GCST90277344 | PCOS | PC (O-18:2_20:4) levels | MR Egger | 14 | -0.200386988 | 0.258903466827407 | 0.453919614930412 | 0.818413975574438 | 0.492708389108691 | 1.35942770657351 |
| GCST90277344 | PCOS | PC (O-18:2_20:4) levels | Weighted median | 14 | -0.002070928 | 0.127453060889589 | 0.987036096906562 | 0.997931214444184 | 0.777338846502216 | 1.2811230433718 |
| GCST90277344 | PCOS | PC (O-18:2_20:4) levels | Inverse variance weighted | 14 | -0.079259818 | 0.106102608049921 | 0.455056905002129 | 0.923799873292707 | 0.750345936654047 | 1.13735033963287 |
| GCST90277344 | PCOS | PC (O-18:2_20:4) levels | Simple mode | 14 | -0.450460933 | 0.26778283755567 | 0.116381974244245 | 0.637334315377472 | 0.377073445527676 | 1.07723053525883 |
| GCST90277344 | PCOS | PC (O-18:2_20:4) levels | Weighted mode | 14 | 0.0966514850611448 | 0.173855669232778 | 0.587700097441448 | 1.10147642572995 | 0.783404881470939 | 1.54868873699228 |
| GCST90277345 | PCOS | PE (16:0_18:2) levels | MR Egger | 14 | -0.067633519 | 0.125948884735597 | 0.601088313427464 | 0.934602925322891 | 0.730158728060685 | 1.19629142877206 |
| GCST90277345 | PCOS | PE (16:0_18:2) levels | Weighted median | 14 | -0.017828412 | 0.0674928767531152 | 0.791662410711284 | 0.982329573724021 | 0.860609473535273 | 1.12126512789691 |
| GCST90277345 | PCOS | PE (16:0_18:2) levels | Inverse variance weighted | 14 | -0.030483264 | 0.0515317182841678 | 0.554156180826009 | 0.969976665913459 | 0.876792048703394 | 1.07306485478276 |
| GCST90277345 | PCOS | PE (16:0_18:2) levels | Simple mode | 14 | -0.032247336 | 0.102342953481325 | 0.757693243024504 | 0.968267065006745 | 0.792280704586394 | 1.1833446198418 |
| GCST90277345 | PCOS | PE (16:0_18:2) levels | Weighted mode | 14 | -0.010513257 | 0.0670773912653669 | 0.877863040974778 | 0.989541814569278 | 0.867634319983347 | 1.12857799677617 |
| GCST90277346 | PCOS | PE (16:0_20:4) levels | MR Egger | 19 | -0.008842505 | 0.105815492986384 | 0.934378186450177 | 0.991196475182478 | 0.805541246946894 | 1.2196401564015 |
| GCST90277346 | PCOS | PE (16:0_20:4) levels | Weighted median | 19 | 0.0114706731014125 | 0.0645982283643715 | 0.859061103745448 | 1.01153671353998 | 0.891239708582549 | 1.14807106661193 |
| GCST90277346 | PCOS | PE (16:0_20:4) levels | Inverse variance weighted | 19 | -0.032964863 | 0.0577666769129415 | 0.568233289505541 | 0.96757255624945 | 0.863995645518472 | 1.08356640043631 |
| GCST90277346 | PCOS | PE (16:0_20:4) levels | Simple mode | 19 | 0.00450635704876778 | 0.129841269166909 | 0.972695633203355 | 1.00451652594485 | 0.778814388436215 | 1.29562764360631 |
| GCST90277346 | PCOS | PE (16:0_20:4) levels | Weighted mode | 19 | 0.0155394948681806 | 0.0640795576219778 | 0.811131969920198 | 1.01566086065799 | 0.895783577572793 | 1.15158059345948 |
| GCST90277347 | PCOS | PE (18:0_18:2) levels | MR Egger | 22 | 0.0476503140775622 | 0.101895246026014 | 0.645097245000293 | 1.04880383925501 | 0.858932991048324 | 1.28064645868769 |
| GCST90277347 | PCOS | PE (18:0_18:2) levels | Weighted median | 22 | 0.0140371487925685 | 0.0665826325885168 | 0.833025408737138 | 1.01413613217154 | 0.890061416724786 | 1.15550688441297 |
| GCST90277347 | PCOS | PE (18:0_18:2) levels | Inverse variance weighted | 22 | 0.0840659528776527 | 0.0501747081193611 | 0.093843089152225 | 1.08770062842972 | 0.98582495059293 | 1.20010419332035 |
| GCST90277347 | PCOS | PE (18:0_18:2) levels | Simple mode | 22 | 0.097806195582723 | 0.119068740602846 | 0.420631695304794 | 1.10274904676105 | 0.873219313919698 | 1.39261173080768 |
| GCST90277347 | PCOS | PE (18:0_18:2) levels | Weighted mode | 22 | 0.0199936992807587 | 0.0622868500782417 | 0.751387662084709 | 1.02019491204479 | 0.902949612825227 | 1.15266416174159 |
| GCST90277348 | PCOS | PE (18:0_20:4) levels | MR Egger | 16 | -0.035453128 | 0.131776521594534 | 0.791823384127711 | 0.965167972362324 | 0.745473933515625 | 1.2496066904457 |
| GCST90277348 | PCOS | PE (18:0_20:4) levels | Weighted median | 16 | 0.0263006263332653 | 0.0682315009575881 | 0.699895420919858 | 1.0266495399725 | 0.898136591819637 | 1.17355120315309 |
| GCST90277348 | PCOS | PE (18:0_20:4) levels | Inverse variance weighted | 16 | 0.0615046562357699 | 0.0530910832427424 | 0.246670527919832 | 1.06343544812344 | 0.958338841368837 | 1.18005751568016 |
| GCST90277348 | PCOS | PE (18:0_20:4) levels | Simple mode | 16 | 0.117645093979796 | 0.111965306600799 | 0.310017684711708 | 1.12484482631654 | 0.903203937228008 | 1.40087507498507 |
| GCST90277348 | PCOS | PE (18:0_20:4) levels | Weighted mode | 16 | 0.0395183747228245 | 0.067281327199411 | 0.565699116801696 | 1.04030961411015 | 0.911783209006359 | 1.18695330482058 |
| GCST90277349 | PCOS | PE (18:1_18:1) levels | MR Egger | 15 | -0.068518925 | 0.186636663819674 | 0.719432966171536 | 0.933775788347567 | 0.647700561448064 | 1.34620421040663 |
| GCST90277349 | PCOS | PE (18:1_18:1) levels | Weighted median | 15 | -0.030746151 | 0.086349954860346 | 0.721792285490349 | 0.969721704903213 | 0.818737251912644 | 1.14854940674023 |
| GCST90277349 | PCOS | PE (18:1_18:1) levels | Inverse variance weighted | 15 | -0.010718544 | 0.0648147242059003 | 0.868651148217856 | 0.989338694812017 | 0.871311785464784 | 1.12335339585729 |
| GCST90277349 | PCOS | PE (18:1_18:1) levels | Simple mode | 15 | -0.106460581 | 0.129198051524254 | 0.42374979916672 | 0.89901048579047 | 0.697893503440404 | 1.15808479313382 |
| GCST90277349 | PCOS | PE (18:1_18:1) levels | Weighted mode | 15 | -0.024289472 | 0.0896028066348796 | 0.79028591491173 | 0.976003143183184 | 0.818803645380211 | 1.16338287070171 |
| GCST90277350 | PCOS | PE (O-16:1_18:2) levels | MR Egger | 8 | -0.067115211 | 0.349160038686617 | 0.85391130826596 | 0.935087462527142 | 0.471673208959168 | 1.85380162783667 |
| GCST90277350 | PCOS | PE (O-16:1_18:2) levels | Weighted median | 8 | -0.001485804 | 0.143177670586351 | 0.991720224680549 | 0.998515299074432 | 0.754187673171229 | 1.3219956225131 |
| GCST90277350 | PCOS | PE (O-16:1_18:2) levels | Inverse variance weighted | 8 | 0.0406255981676678 | 0.106773765240254 | 0.703586943670753 | 1.04146210722074 | 0.844803703887492 | 1.28389981694626 |
| GCST90277350 | PCOS | PE (O-16:1_18:2) levels | Simple mode | 8 | 0.00885285330544427 | 0.209120194315911 | 0.967414817677208 | 1.00889215570511 | 0.669634841703134 | 1.52002751119476 |
| GCST90277350 | PCOS | PE (O-16:1_18:2) levels | Weighted mode | 8 | -0.003460836 | 0.190802384618154 | 0.986034671989216 | 0.996545145373688 | 0.685618786677095 | 1.44847580910233 |
| GCST90277351 | PCOS | PE (O-16:1_20:4) levels | MR Egger | 18 | 0.138405291892297 | 0.192212218539987 | 0.481872457099292 | 1.1484409097541 | 0.787942109876949 | 1.67387490357991 |
| GCST90277351 | PCOS | PE (O-16:1_20:4) levels | Weighted median | 18 | 5.3003725557151e-4 | 0.105488852370297 | 0.995990981474461 | 1.00053017775014 | 0.813647451233409 | 1.23033708895814 |
| GCST90277351 | PCOS | PE (O-16:1_20:4) levels | Inverse variance weighted | 18 | -0.107018706 | 0.0755805671966854 | 0.156788588089865 | 0.89850886551128 | 0.774795141980259 | 1.04197630787796 |
| GCST90277351 | PCOS | PE (O-16:1_20:4) levels | Simple mode | 18 | -0.453928734 | 0.230853612052942 | 0.0658099809350742 | 0.635127994626513 | 0.403975190045968 | 0.998545404514556 |
| GCST90277351 | PCOS | PE (O-16:1_20:4) levels | Weighted mode | 18 | 0.0713946793737583 | 0.135260623527965 | 0.604438918695031 | 1.07400502986211 | 0.823891738729828 | 1.40004657158889 |
| GCST90277352 | PCOS | PE (O-16:1_22:5) levels | MR Egger | 6 | 0.0907392214920144 | 0.226596463344988 | 0.709295313234273 | 1.09498341988031 | 0.702303349384139 | 1.70722336845496 |
| GCST90277352 | PCOS | PE (O-16:1_22:5) levels | Weighted median | 6 | 0.00294063342790895 | 0.16945424647231 | 0.986154562054991 | 1.00294496133161 | 0.719506520855816 | 1.39803958171775 |
| GCST90277352 | PCOS | PE (O-16:1_22:5) levels | Inverse variance weighted | 6 | 0.0389222464600846 | 0.13298881545173 | 0.769772047005064 | 1.0396896409573 | 0.801126968632869 | 1.34929242409424 |
| GCST90277352 | PCOS | PE (O-16:1_22:5) levels | Simple mode | 6 | -0.008081751 | 0.227578244945591 | 0.973045638106934 | 0.991950818577903 | 0.634996932337219 | 1.54956091339797 |
| GCST90277352 | PCOS | PE (O-16:1_22:5) levels | Weighted mode | 6 | 0.0124938571039305 | 0.230345451646255 | 0.958844743012182 | 1.01257223139555 | 0.644691592227389 | 1.59037675712657 |
| GCST90277353 | PCOS | PE (O-18:1_18:2) levels | MR Egger | 18 | -0.347153003 | 0.174145557250805 | 0.0635466200534551 | 0.706697193349831 | 0.502339900898101 | 0.994189237597184 |
| GCST90277353 | PCOS | PE (O-18:1_18:2) levels | Weighted median | 18 | -0.018521781 | 0.11621993375322 | 0.873378660631507 | 0.981648693129781 | 0.781677637963519 | 1.23277692737115 |
| GCST90277353 | PCOS | PE (O-18:1_18:2) levels | Inverse variance weighted | 18 | -0.016278369 | 0.0823252427732794 | 0.843254430338528 | 0.983853407931454 | 0.837247256139423 | 1.15613102485599 |
| GCST90277353 | PCOS | PE (O-18:1_18:2) levels | Simple mode | 18 | 0.0497599447438892 | 0.190331426610864 | 0.796895518188967 | 1.05101876351187 | 0.723764184684755 | 1.52624358130564 |
| GCST90277353 | PCOS | PE (O-18:1_18:2) levels | Weighted mode | 18 | -0.009015233 | 0.137625539829128 | 0.948535678512134 | 0.991025281919766 | 0.756720517262222 | 1.29787826152442 |
| GCST90277354 | PCOS | PE (O-18:1_20:4) levels | MR Egger | 15 | 0.21586577555144 | 0.211424864225347 | 0.325877620977353 | 1.24093580389772 | 0.819937666292073 | 1.87809602205388 |
| GCST90277354 | PCOS | PE (O-18:1_20:4) levels | Weighted median | 15 | 0.0361133708751565 | 0.106889934716317 | 0.73547195278904 | 1.03677337973377 | 0.840808877423945 | 1.27841067070777 |
| GCST90277354 | PCOS | PE (O-18:1_20:4) levels | Inverse variance weighted | 15 | 0.0376903122750862 | 0.0868190553819919 | 0.66419775693374 | 1.03840960037158 | 0.875924800180316 | 1.23103547007904 |
| GCST90277354 | PCOS | PE (O-18:1_20:4) levels | Simple mode | 15 | 0.0561097953814835 | 0.19604730532189 | 0.778912311150504 | 1.05771380945267 | 0.720260070582911 | 1.55327019836246 |
| GCST90277354 | PCOS | PE (O-18:1_20:4) levels | Weighted mode | 15 | 0.0329903596550478 | 0.113875852809483 | 0.776288527847959 | 1.03354057550561 | 0.826788540071666 | 1.29199434854754 |
| GCST90277355 | PCOS | PE (O-18:2_18:1) levels | MR Egger | 11 | 0.456243664761104 | 0.283833751407111 | 0.142421305194244 | 1.57813483376862 | 0.904773640106718 | 2.75263275050782 |
| GCST90277355 | PCOS | PE (O-18:2_18:1) levels | Weighted median | 11 | -0.032921905 | 0.145002773725793 | 0.820390089053654 | 0.967614122266332 | 0.728238014149716 | 1.28567456163687 |
| GCST90277355 | PCOS | PE (O-18:2_18:1) levels | Inverse variance weighted | 11 | 0.0593673677582348 | 0.10831456545734 | 0.583622261658656 | 1.06116500695173 | 0.85819049624847 | 1.31214593601469 |
| GCST90277355 | PCOS | PE (O-18:2_18:1) levels | Simple mode | 11 | -0.138283603 | 0.257138539944173 | 0.602491713264466 | 0.870851680565067 | 0.526094122941917 | 1.44153415989923 |
| GCST90277355 | PCOS | PE (O-18:2_18:1) levels | Weighted mode | 11 | -0.138283603 | 0.222232333981409 | 0.547703708320696 | 0.870851680565067 | 0.563347294101664 | 1.34620802741646 |
| GCST90277356 | PCOS | PE (O-18:2_18:2) levels | MR Egger | 7 | -0.257638166 | 0.266967328347104 | 0.378840125264661 | 0.772874834107327 | 0.457996320241537 | 1.30423648137917 |
| GCST90277356 | PCOS | PE (O-18:2_18:2) levels | Weighted median | 7 | -0.132656612 | 0.141095315432521 | 0.347119356361425 | 0.875765767904952 | 0.664179104433989 | 1.15475731638344 |
| GCST90277356 | PCOS | PE (O-18:2_18:2) levels | Inverse variance weighted | 7 | -0.202768604 | 0.113608207234519 | 0.0742927976856507 | 0.816467146 | 0.653481738418588 | 1.02010287676072 |
| GCST90277356 | PCOS | PE (O-18:2_18:2) levels | Simple mode | 7 | -0.137975126 | 0.211268235553194 | 0.537909831840596 | 0.871120359448033 | 0.575762017340697 | 1.31799364631556 |
| GCST90277356 | PCOS | PE (O-18:2_18:2) levels | Weighted mode | 7 | -0.111160775 | 0.169749613954622 | 0.53684443840824 | 0.894794876610012 | 0.641548804902471 | 1.24800773548202 |
| GCST90277357 | PCOS | PE (O-18:2_20:4) levels | MR Egger | 11 | 0.0177143131125969 | 0.246989278566696 | 0.944392478341921 | 1.01787214212395 | 0.627265945435526 | 1.65171360768299 |
| GCST90277357 | PCOS | PE (O-18:2_20:4) levels | Weighted median | 11 | 0.0602378514020141 | 0.125690404235283 | 0.631756683812012 | 1.06208913589484 | 0.830177836001524 | 1.35878517067972 |
| GCST90277357 | PCOS | PE (O-18:2_20:4) levels | Inverse variance weighted | 11 | 0.0799473667475474 | 0.0988174156102611 | 0.418491411966061 | 1.08323005225371 | 0.892494642766781 | 1.31472760717983 |
| GCST90277357 | PCOS | PE (O-18:2_20:4) levels | Simple mode | 11 | 0.0808329568016862 | 0.17786064783135 | 0.65919359300948 | 1.08418977491203 | 0.765080736399069 | 1.53639663384581 |
| GCST90277357 | PCOS | PE (O-18:2_20:4) levels | Weighted mode | 11 | 0.0625987631374075 | 0.146144765415276 | 0.677487131958852 | 1.06459959692217 | 0.799439056143376 | 1.41770944646415 |
| GCST90277358 | PCOS | PI (16:0_18:1) levels | MR Egger | 9 | -0.089990332 | 0.307646693407841 | 0.778375389759364 | 0.913940021147768 | 0.500084671879881 | 1.67028987134446 |
| GCST90277358 | PCOS | PI (16:0_18:1) levels | Weighted median | 9 | 0.243356863668739 | 0.149940492988745 | 0.104584495502635 | 1.27552373098628 | 0.950728731565419 | 1.71127760663159 |
| GCST90277358 | PCOS | PI (16:0_18:1) levels | Inverse variance weighted | 9 | 0.186298744893634 | 0.11347423501013 | 0.100637404293445 | 1.2047821291295 | 0.964533459963198 | 1.50487260309786 |
| GCST90277358 | PCOS | PI (16:0_18:1) levels | Simple mode | 9 | -0.053813164 | 0.248032355629667 | 0.83367007719984 | 0.947609137195641 | 0.5827735550846 | 1.54084389907897 |
| GCST90277358 | PCOS | PI (16:0_18:1) levels | Weighted mode | 9 | -0.057088007 | 0.256847847597943 | 0.829677707435281 | 0.944510942325946 | 0.570917942483165 | 1.56257292649329 |
| GCST90277359 | PCOS | PI (16:0_18:2) levels | MR Egger | 19 | 0.0896567927166486 | 0.219116537349003 | 0.687520890818532 | 1.09379881955649 | 0.71190441833913 | 1.68055686528025 |
| GCST90277359 | PCOS | PI (16:0_18:2) levels | Weighted median | 19 | 0.197075333148695 | 0.106129191030337 | 0.0633199681829817 | 1.21783578065429 | 0.989121719851324 | 1.49943526552502 |
| GCST90277359 | PCOS | PI (16:0_18:2) levels | Inverse variance weighted | 19 | 0.240581253186614 | 0.0767652933608356 | 0.00172449860466814 | 1.27198828273173 | 1.09430699123924 | 1.4785194688143 |
| GCST90277359 | PCOS | PI (16:0_18:2) levels | Simple mode | 19 | 0.031581958950549 | 0.167859852039788 | 0.852867961080602 | 1.03208596081157 | 0.742729510478064 | 1.4341714116337 |
| GCST90277359 | PCOS | PI (16:0_18:2) levels | Weighted mode | 19 | 0.111816762168558 | 0.120875182407841 | 0.367171431510266 | 1.11830792555052 | 0.882409896782151 | 1.41726948089508 |
| GCST90277360 | PCOS | PI (16:0_20:4) levels | MR Egger | 13 | -0.368682281 | 0.249223105401081 | 0.167111759928943 | 0.691645124077584 | 0.424365754115555 | 1.12726574428066 |
| GCST90277360 | PCOS | PI (16:0_20:4) levels | Weighted median | 13 | -0.022752711 | 0.124336125279158 | 0.854803066186789 | 0.977504179849473 | 0.76609314561238 | 1.24725619475344 |
| GCST90277360 | PCOS | PI (16:0_20:4) levels | Inverse variance weighted | 13 | -0.091424948 | 0.0993071227938857 | 0.357244521267954 | 0.91262980852129 | 0.751212351844948 | 1.10873199216713 |
| GCST90277360 | PCOS | PI (16:0_20:4) levels | Simple mode | 13 | 0.00703298608135872 | 0.213639114011318 | 0.974279662348216 | 1.00705777560869 | 0.66252321688517 | 1.5307619983221 |
| GCST90277360 | PCOS | PI (16:0_20:4) levels | Weighted mode | 13 | 0.0159234603342164 | 0.198622277092407 | 0.937423902701577 | 1.01605091423245 | 0.688406203804667 | 1.49963706690465 |
| GCST90277361 | PCOS | PI (18:0_18:1) levels | MR Egger | 16 | 0.142607682814669 | 0.195685839313385 | 0.478164004926781 | 1.15327726241286 | 0.785891480002464 | 1.69240725703544 |
| GCST90277361 | PCOS | PI (18:0_18:1) levels | Weighted median | 16 | 0.171092192801984 | 0.0951457190468734 | 0.0721433869089299 | 1.18660013997084 | 0.984724456508357 | 1.42986180842039 |
| GCST90277361 | PCOS | PI (18:0_18:1) levels | Inverse variance weighted | 16 | 0.16076250208222 | 0.0667362285760265 | 0.0159996297764484 | 1.17440601670631 | 1.03041279528294 | 1.33852131727195 |
| GCST90277361 | PCOS | PI (18:0_18:1) levels | Simple mode | 16 | 0.104202275549445 | 0.165406932502829 | 0.53818964780457 | 1.10982492265867 | 0.802522560054149 | 1.53479966827501 |
| GCST90277361 | PCOS | PI (18:0_18:1) levels | Weighted mode | 16 | 0.155618638902431 | 0.130424235953962 | 0.251333242991781 | 1.16838054323026 | 0.904825778673768 | 1.50870269832489 |
| GCST90277362 | PCOS | PI (18:0_18:2) levels | MR Egger | 23 | 0.0788611204472414 | 0.112456607745147 | 0.490840554037618 | 1.08205403645411 | 0.868008448795971 | 1.3488819601131 |
| GCST90277362 | PCOS | PI (18:0_18:2) levels | Weighted median | 23 | 0.138536842084946 | 0.0714562224763757 | 0.0525299275059141 | 1.14859199731461 | 0.998483796630754 | 1.32126688559878 |
| GCST90277362 | PCOS | PI (18:0_18:2) levels | Inverse variance weighted | 23 | 0.168717211306558 | 0.0595244234076074 | 0.00459089627451552 | 1.18378533047926 | 1.05342771885863 | 1.33027419306587 |
| GCST90277362 | PCOS | PI (18:0_18:2) levels | Simple mode | 23 | 0.108114389192355 | 0.134598652642399 | 0.430432004581155 | 1.11417518769718 | 0.855816778134313 | 1.45052817448412 |
| GCST90277362 | PCOS | PI (18:0_18:2) levels | Weighted mode | 23 | 0.0942705690544136 | 0.0662907981704225 | 0.16902769085426 | 1.09885702240394 | 0.964968910404433 | 1.25132192619592 |
| GCST90277363 | PCOS | PI (18:0_20:3) levels | MR Egger | 23 | -0.13445463 | 0.124554665991391 | 0.292615392296229 | 0.87419254048413 | 0.684831966703052 | 1.1159125668698 |
| GCST90277363 | PCOS | PI (18:0_20:3) levels | Weighted median | 23 | -0.026950534 | 0.0771358448091185 | 0.726796134508726 | 0.973409390557522 | 0.836827945727803 | 1.13228274278231 |
| GCST90277363 | PCOS | PI (18:0_20:3) levels | Inverse variance weighted | 23 | -0.016775678 | 0.0608478348619021 | 0.782779378415943 | 0.983364249991825 | 0.87280995869868 | 1.10792187752274 |
| GCST90277363 | PCOS | PI (18:0_20:3) levels | Simple mode | 23 | -0.089870931 | 0.15371995261009 | 0.564737553455761 | 0.914049153412586 | 0.676270565807206 | 1.23543134522943 |
| GCST90277363 | PCOS | PI (18:0_20:3) levels | Weighted mode | 23 | -0.053958337 | 0.0824254586715551 | 0.519490814527553 | 0.947471579823098 | 0.806128406103198 | 1.11359727281159 |
| GCST90277364 | PCOS | PI (18:0_20:4) levels | MR Egger | 22 | -0.17819709 | 0.136358474504908 | 0.206098701159306 | 0.836777487096597 | 0.640529757051168 | 1.09315227778834 |
| GCST90277364 | PCOS | PI (18:0_20:4) levels | Weighted median | 22 | -0.023073446 | 0.0826509330600295 | 0.78011635973753 | 0.977190710222946 | 0.831046711124286 | 1.14903491147228 |
| GCST90277364 | PCOS | PI (18:0_20:4) levels | Inverse variance weighted | 22 | -0.030044919 | 0.0624162313215976 | 0.630257907555926 | 0.970401943171668 | 0.858661298407107 | 1.09668379494714 |
| GCST90277364 | PCOS | PI (18:0_20:4) levels | Simple mode | 22 | -0.022868951 | 0.137957288970147 | 0.869924794355606 | 0.97739056124158 | 0.745824293828643 | 1.28085437429263 |
| GCST90277364 | PCOS | PI (18:0_20:4) levels | Weighted mode | 22 | -0.064301426 | 0.0906227658013291 | 0.485787348096561 | 0.937722303392585 | 0.785117377736368 | 1.11998937129011 |
| GCST90277365 | PCOS | PI (18:1_18:1) levels | MR Egger | 16 | -0.123552906 | 0.20149982282747 | 0.549598751677534 | 0.883774883026994 | 0.595417428609895 | 1.31178229984449 |
| GCST90277365 | PCOS | PI (18:1_18:1) levels | Weighted median | 16 | 0.111596821978342 | 0.107477103242044 | 0.299115920898223 | 1.11806199173902 | 0.905689904422303 | 1.38023247390482 |
| GCST90277365 | PCOS | PI (18:1_18:1) levels | Inverse variance weighted | 16 | 0.159739413558152 | 0.0745270033320571 | 0.0320828935969002 | 1.17320510980981 | 1.01376030034014 | 1.35772749161911 |
| GCST90277365 | PCOS | PI (18:1_18:1) levels | Simple mode | 16 | 0.362549658975141 | 0.194102808101909 | 0.0814488507759635 | 1.43698857859444 | 0.982267263823086 | 2.10221418453255 |
| GCST90277365 | PCOS | PI (18:1_18:1) levels | Weighted mode | 16 | -0.004660431 | 0.16418629127979 | 0.97772928829576 | 0.995350412433238 | 0.721469220988576 | 1.37320126030256 |
| GCST90277366 | PCOS | PI (18:1_18:2) levels | MR Egger | 16 | 0.20488346947047 | 0.328194556682856 | 0.542487253958053 | 1.22738202915153 | 0.645081985070256 | 2.33531036418581 |
| GCST90277366 | PCOS | PI (18:1_18:2) levels | Weighted median | 16 | -0.012423519 | 0.114641212801005 | 0.913703227966611 | 0.987653334024797 | 0.788896380923376 | 1.23648571827463 |
| GCST90277366 | PCOS | PI (18:1_18:2) levels | Inverse variance weighted | 16 | 0.102149472844844 | 0.0924034867503499 | 0.268955094582383 | 1.10754900785706 | 0.924075628941788 | 1.32745066138133 |
| GCST90277366 | PCOS | PI (18:1_18:2) levels | Simple mode | 16 | -0.070771611 | 0.187811043500772 | 0.711582122009918 | 0.931674652134996 | 0.644757336023976 | 1.34627030811882 |
| GCST90277366 | PCOS | PI (18:1_18:2) levels | Weighted mode | 16 | -0.056400706 | 0.16790602556165 | 0.74159401025015 | 0.945160329043438 | 0.680112865698564 | 1.31349970372923 |
| GCST90277367 | PCOS | PI (18:1_20:4) levels | MR Egger | 13 | -0.160388291 | 0.218394961273214 | 0.478070967634098 | 0.851812973217842 | 0.555191369173142 | 1.30691034052429 |
| GCST90277367 | PCOS | PI (18:1_20:4) levels | Weighted median | 13 | -0.064363717 | 0.126090241907554 | 0.609730942131287 | 0.937663893335805 | 0.732347177690005 | 1.2005420429678 |
| GCST90277367 | PCOS | PI (18:1_20:4) levels | Inverse variance weighted | 13 | -0.057188954 | 0.0918259572829482 | 0.533417764764614 | 0.94441560158429 | 0.788858882657849 | 1.1306468724935 |
| GCST90277367 | PCOS | PI (18:1_20:4) levels | Simple mode | 13 | -0.046689597 | 0.238840451169705 | 0.848284676799177 | 0.954383595182232 | 0.597610018194178 | 1.52415123411972 |
| GCST90277367 | PCOS | PI (18:1_20:4) levels | Weighted mode | 13 | -0.021745895 | 0.225816207766263 | 0.924872610268166 | 0.978488842495572 | 0.628546252298612 | 1.52326167149504 |
| GCST90277368 | PCOS | SM (d32:1) levels | MR Egger | 22 | -0.060048462 | 0.0953543112835599 | 0.535993080645279 | 0.941718894976656 | 0.78118528853958 | 1.13524216362802 |
| GCST90277368 | PCOS | SM (d32:1) levels | Weighted median | 22 | -0.035646349 | 0.0814164577754948 | 0.661511472651619 | 0.964981500161818 | 0.822651510605468 | 1.13193652919837 |
| GCST90277368 | PCOS | SM (d32:1) levels | Inverse variance weighted | 22 | 0.00718556481600983 | 0.0587637505889983 | 0.902678168442599 | 1.0072114429327 | 0.897635328324069 | 1.13016372992878 |
| GCST90277368 | PCOS | SM (d32:1) levels | Simple mode | 22 | 0.173289893622122 | 0.167484598106323 | 0.312595608092959 | 1.18921079974543 | 0.856432375615283 | 1.65129479746157 |
| GCST90277368 | PCOS | SM (d32:1) levels | Weighted mode | 22 | -0.055243733 | 0.0823534648317161 | 0.509651315982482 | 0.946254486433161 | 0.805206490889432 | 1.11200985489552 |
| GCST90277369 | PCOS | SM (d34:0) levels | MR Egger | 16 | 0.101794203476978 | 0.111206293685453 | 0.375498270418797 | 1.10715559950826 | 0.890323737722968 | 1.37679528196957 |
| GCST90277369 | PCOS | SM (d34:0) levels | Weighted median | 16 | 0.0773400105383353 | 0.0858890827673526 | 0.367873477250865 | 1.0804093645178 | 0.913015344647409 | 1.2784937315468 |
| GCST90277369 | PCOS | SM (d34:0) levels | Inverse variance weighted | 16 | 0.0812993479412822 | 0.065928837703352 | 0.217524322467142 | 1.08469554935188 | 0.953208921803363 | 1.23431957871088 |
| GCST90277369 | PCOS | SM (d34:0) levels | Simple mode | 16 | 0.0781915304326192 | 0.133826856213647 | 0.567720101435569 | 1.08132974639178 | 0.831845038137903 | 1.40563923185639 |
| GCST90277369 | PCOS | SM (d34:0) levels | Weighted mode | 16 | 0.0872427090080488 | 0.0983246850023225 | 0.388927254054419 | 1.09116148230298 | 0.899898163617097 | 1.32307568633761 |
| GCST90277370 | PCOS | SM (d34:1) levels | MR Egger | 26 | 0.0348619775415815 | 0.119099357098856 | 0.772257033821403 | 1.03547677988536 | 0.819900110692926 | 1.3077351102875 |
| GCST90277370 | PCOS | SM (d34:1) levels | Weighted median | 26 | -0.059107129 | 0.0881970340782211 | 0.502748536697825 | 0.942605783008647 | 0.792967282454395 | 1.12048212053748 |
| GCST90277370 | PCOS | SM (d34:1) levels | Inverse variance weighted | 26 | -0.056496621 | 0.0628041373490726 | 0.368349948363343 | 0.945069677794034 | 0.835610460945537 | 1.06886729837617 |
| GCST90277370 | PCOS | SM (d34:1) levels | Simple mode | 26 | -0.024887361 | 0.174953178685779 | 0.888021535775383 | 0.975419775993682 | 0.692258670864783 | 1.37440494347439 |
| GCST90277370 | PCOS | SM (d34:1) levels | Weighted mode | 26 | -0.059004284 | 0.14211915343851 | 0.681555601065476 | 0.942702730440208 | 0.713510714813913 | 1.24551519623808 |
| GCST90277371 | PCOS | SM (d34:2) levels | MR Egger | 16 | 0.14188748740409 | 0.191376690903876 | 0.47070311930818 | 1.1524469764413 | 0.791986583950593 | 1.67696531787659 |
| GCST90277371 | PCOS | SM (d34:2) levels | Weighted median | 16 | 0.0680944366358699 | 0.108949351263101 | 0.531964479218388 | 1.07046639495072 | 0.864636326853276 | 1.3252951178782 |
| GCST90277371 | PCOS | SM (d34:2) levels | Inverse variance weighted | 16 | 0.0304924994571851 | 0.078665191639094 | 0.698294463450007 | 1.03096215724398 | 0.883652603405417 | 1.2028289913627 |
| GCST90277371 | PCOS | SM (d34:2) levels | Simple mode | 16 | 0.0975995807002678 | 0.185089791096387 | 0.60569086379441 | 1.10252122593277 | 0.767070619227526 | 1.58466902937362 |
| GCST90277371 | PCOS | SM (d34:2) levels | Weighted mode | 16 | 0.0857159092939326 | 0.156047794109253 | 0.590888981555088 | 1.08949676842947 | 0.802408244842143 | 1.47930086218365 |
| GCST90277372 | PCOS | SM (d36:1) levels | MR Egger | 19 | 0.0549825391865502 | 0.179419738970645 | 0.762986211447338 | 1.05652216677798 | 0.743281713599204 | 1.50177122411374 |
| GCST90277372 | PCOS | SM (d36:1) levels | Weighted median | 19 | 0.0227394256844714 | 0.099909354004286 | 0.819956778616554 | 1.02299993730543 | 0.841067880560175 | 1.24428586076773 |
| GCST90277372 | PCOS | SM (d36:1) levels | Inverse variance weighted | 19 | -0.016607715 | 0.071050726796681 | 0.815183357707927 | 0.983529432953967 | 0.855672868049498 | 1.13049061341839 |
| GCST90277372 | PCOS | SM (d36:1) levels | Simple mode | 19 | 0.0788013951398953 | 0.191484112279839 | 0.685542872726776 | 1.08198941237409 | 0.743410077740248 | 1.57477161467627 |
| GCST90277372 | PCOS | SM (d36:1) levels | Weighted mode | 19 | 0.0752711309644674 | 0.156970204035696 | 0.637339811172087 | 1.07817643827634 | 0.792636562910874 | 1.46657937123821 |
| GCST90277373 | PCOS | SM (d36:2) levels | MR Egger | 15 | 0.474370782983458 | 0.195516442971591 | 0.030545318545306 | 1.60700272584084 | 1.09544267913983 | 2.35745585783429 |
| GCST90277373 | PCOS | SM (d36:2) levels | Weighted median | 15 | 0.0472997984824429 | 0.108912363008375 | 0.664076208962496 | 1.04843628157425 | 0.846903575653742 | 1.29792655046087 |
| GCST90277373 | PCOS | SM (d36:2) levels | Inverse variance weighted | 15 | 7.9432850248444e-4 | 0.0958024141731345 | 0.993384559332709 | 1.00079464406492 | 0.829461649845575 | 1.20751805677272 |
| GCST90277373 | PCOS | SM (d36:2) levels | Simple mode | 15 | 0.143591070386897 | 0.177857265123408 | 0.432974422752878 | 1.15441193876191 | 0.814639846736695 | 1.63589705278286 |
| GCST90277373 | PCOS | SM (d36:2) levels | Weighted mode | 15 | 0.0507532317882098 | 0.124449617710645 | 0.689572910799923 | 1.05206324548233 | 0.824343457201475 | 1.34268921870547 |
| GCST90277374 | PCOS | SM (d38:1) levels | MR Egger | 28 | 0.0182791093658108 | 0.113464520171536 | 0.873260085054509 | 1.0184471948746 | 0.815371574368521 | 1.2721006242476 |
| GCST90277374 | PCOS | SM (d38:1) levels | Weighted median | 28 | -0.046018429 | 0.0810010867080596 | 0.569952718110186 | 0.955024361643633 | 0.814826102885984 | 1.11934500883368 |
| GCST90277374 | PCOS | SM (d38:1) levels | Inverse variance weighted | 28 | -0.017294173 | 0.0560310486012793 | 0.757585204010937 | 0.982854512819003 | 0.880632369141469 | 1.09694241004386 |
| GCST90277374 | PCOS | SM (d38:1) levels | Simple mode | 28 | 0.0701011301843697 | 0.13996503351545 | 0.620537154258427 | 1.07261664968895 | 0.815274562879764 | 1.41118897801258 |
| GCST90277374 | PCOS | SM (d38:1) levels | Weighted mode | 28 | -0.038005362 | 0.0986588899089481 | 0.70309266515225 | 0.962707778911044 | 0.793440452336614 | 1.16808547490422 |
| GCST90277375 | PCOS | SM (d38:2) levels | MR Egger | 24 | -0.026512278 | 0.137143209685521 | 0.848483445893432 | 0.973836087092353 | 0.744298608699737 | 1.27416162470072 |
| GCST90277375 | PCOS | SM (d38:2) levels | Weighted median | 24 | -0.122839662 | 0.0866106160016122 | 0.156103785000861 | 0.884405454925424 | 0.746323244176204 | 1.0480351708263 |
| GCST90277375 | PCOS | SM (d38:2) levels | Inverse variance weighted | 24 | -0.090233413 | 0.0590280004429232 | 0.126350142361167 | 0.91371788711578 | 0.813891435526713 | 1.0257883801112 |
| GCST90277375 | PCOS | SM (d38:2) levels | Simple mode | 24 | -0.027110606 | 0.174945957120946 | 0.878200343715316 | 0.973253588349959 | 0.690731096986771 | 1.37133328927597 |
| GCST90277375 | PCOS | SM (d38:2) levels | Weighted mode | 24 | -0.116043652 | 0.102559573627285 | 0.269514920766418 | 0.890436353565361 | 0.728286753761727 | 1.08868779454717 |
| GCST90277376 | PCOS | SM (d40:1) levels | MR Egger | 28 | 0.125840278774382 | 0.0952980333330155 | 0.19817750691136 | 1.1341010138124 | 0.94087605290474 | 1.36700801934486 |
| GCST90277376 | PCOS | SM (d40:1) levels | Weighted median | 28 | 0.0679802426532416 | 0.0887793732462429 | 0.443842247265309 | 1.07034416110913 | 0.899400068117083 | 1.27377867072972 |
| GCST90277376 | PCOS | SM (d40:1) levels | Inverse variance weighted | 28 | 0.0645090967079038 | 0.0560928406904709 | 0.250126763839495 | 1.06663528107011 | 0.955583747756932 | 1.19059247867504 |
| GCST90277376 | PCOS | SM (d40:1) levels | Simple mode | 28 | 0.137391120510344 | 0.160809687293315 | 0.400416856404944 | 1.14727678426072 | 0.837113288843277 | 1.57236067954723 |
| GCST90277376 | PCOS | SM (d40:1) levels | Weighted mode | 28 | 0.082021838780346 | 0.0992749449032935 | 0.415927176135491 | 1.0854795151194 | 0.89354636594778 | 1.31863977365525 |
| GCST90277377 | PCOS | SM (d40:2) levels | MR Egger | 23 | 0.17265193371895 | 0.160543542199416 | 0.294387232748651 | 1.18845237288746 | 0.867609622637509 | 1.62794303540355 |
| GCST90277377 | PCOS | SM (d40:2) levels | Weighted median | 23 | 0.0234831437385814 | 0.0934472707363734 | 0.801583460758392 | 1.0237610438174 | 0.852422053452748 | 1.22953960493256 |
| GCST90277377 | PCOS | SM (d40:2) levels | Inverse variance weighted | 23 | 0.0140202431605233 | 0.0779436217319069 | 0.857249350439562 | 1.01411898770417 | 0.870446260766695 | 1.18150581785057 |
| GCST90277377 | PCOS | SM (d40:2) levels | Simple mode | 23 | 0.127160105936794 | 0.168656348103784 | 0.458867685372914 | 1.13559881934014 | 0.815946625285569 | 1.58047675978239 |
| GCST90277377 | PCOS | SM (d40:2) levels | Weighted mode | 23 | 0.0117722871291732 | 0.110458005297372 | 0.916090426012024 | 1.01184185321727 | 0.814871046630293 | 1.25642448600419 |
| GCST90277378 | PCOS | SM (d42:2) levels | MR Egger | 27 | 0.083400579570044 | 0.115203437820951 | 0.475821884447537 | 1.0869771421858 | 0.867275874419633 | 1.36233388069865 |
| GCST90277378 | PCOS | SM (d42:2) levels | Weighted median | 27 | 0.0834729094999543 | 0.0920492226456208 | 0.364497203077646 | 1.0870557660097 | 0.907607223790488 | 1.30198417050912 |
| GCST90277378 | PCOS | SM (d42:2) levels | Inverse variance weighted | 27 | 0.00269064877536845 | 0.060956881521079 | 0.9647926512052 | 1.0026942718195 | 0.889776617790686 | 1.12994181082892 |
| GCST90277378 | PCOS | SM (d42:2) levels | Simple mode | 27 | 0.0660848550563615 | 0.158113760649222 | 0.679409896703843 | 1.06831736545021 | 0.783630151232203 | 1.45642940298796 |
| GCST90277378 | PCOS | SM (d42:2) levels | Weighted mode | 27 | 0.0660848550563615 | 0.123063986345934 | 0.595836470872716 | 1.06831736545021 | 0.839355823457399 | 1.35973559892792 |
| GCST90277379 | PCOS | TAG (46:1) levels | MR Egger | 15 | 0.10582794259966 | 0.284357643927972 | 0.715766376041287 | 1.11163059578092 | 0.636664124532034 | 1.94093327056011 |
| GCST90277379 | PCOS | TAG (46:1) levels | Weighted median | 15 | 0.011411212746463 | 0.132030351897687 | 0.931125626534486 | 1.01147656899608 | 0.780853070367017 | 1.31021428800582 |
| GCST90277379 | PCOS | TAG (46:1) levels | Inverse variance weighted | 15 | 0.0973800744305961 | 0.107391384731484 | 0.364524553952068 | 1.10227924217068 | 0.893055062704558 | 1.36052028420371 |
| GCST90277379 | PCOS | TAG (46:1) levels | Simple mode | 15 | -0.012873743 | 0.251045923587822 | 0.959826549085112 | 0.987208768895014 | 0.603551592362913 | 1.61474373643471 |
| GCST90277379 | PCOS | TAG (46:1) levels | Weighted mode | 15 | -0.007595499 | 0.258162274771096 | 0.976943797171584 | 0.992433273557316 | 0.598341535835267 | 1.64608963856866 |
| GCST90277380 | PCOS | TAG (46:2) levels | MR Egger | 12 | 0.317716908860979 | 0.328232213867837 | 0.355889810606608 | 1.3739872425528 | 0.722080803374715 | 2.61444554941057 |
| GCST90277380 | PCOS | TAG (46:2) levels | Weighted median | 12 | 0.172317424307649 | 0.132505766805827 | 0.193446007376608 | 1.18805489086829 | 0.916316107210428 | 1.54037936538414 |
| GCST90277380 | PCOS | TAG (46:2) levels | Inverse variance weighted | 12 | 0.202740193060258 | 0.10745689798063 | 0.0591991051317397 | 1.22475422726096 | 0.992155602160132 | 1.51188272678975 |
| GCST90277380 | PCOS | TAG (46:2) levels | Simple mode | 12 | 0.0804754366622553 | 0.224686335371682 | 0.726996247562388 | 1.0838022245152 | 0.697739272803812 | 1.68347591664712 |
| GCST90277380 | PCOS | TAG (46:2) levels | Weighted mode | 12 | 0.0719635916814263 | 0.213138757887284 | 0.741991821731829 | 1.07461621838194 | 0.707662231145737 | 1.63185198528942 |
| GCST90277381 | PCOS | TAG (48:0) levels | MR Egger | 12 | 0.118693654951682 | 0.207200248353819 | 0.579401192165856 | 1.1260249132893 | 0.750197456460625 | 1.69013117070561 |
| GCST90277381 | PCOS | TAG (48:0) levels | Weighted median | 12 | -0.013739121 | 0.128323339145647 | 0.91473628216758 | 0.986354829667558 | 0.767011974183009 | 1.26842328771309 |
| GCST90277381 | PCOS | TAG (48:0) levels | Inverse variance weighted | 12 | -6.19E-04 | 0.096403149476019 | 0.994876058675945 | 0.99938109517876 | 0.827315407274937 | 1.20723313577646 |
| GCST90277381 | PCOS | TAG (48:0) levels | Simple mode | 12 | -0.029422327 | 0.203337419558263 | 0.88756718012194 | 0.971006295571068 | 0.651835095895647 | 1.44645974415221 |
| GCST90277381 | PCOS | TAG (48:0) levels | Weighted mode | 12 | -0.029422327 | 0.203534550457189 | 0.887675251128539 | 0.971006295571068 | 0.65158329074131 | 1.44701873027769 |
| GCST90277382 | PCOS | TAG (48:1) levels | MR Egger | 11 | 0.192845236011349 | 0.292404453558279 | 0.526079208895026 | 1.2126950974649 | 0.683678505561618 | 2.15105402239804 |
| GCST90277382 | PCOS | TAG (48:1) levels | Weighted median | 11 | 0.582850136763517 | 0.148908311019651 | 9.07215327924926e-5 | 1.79113614568413 | 1.3377510019159 | 2.3981807434878 |
| GCST90277382 | PCOS | TAG (48:1) levels | Inverse variance weighted | 11 | 0.383447176024966 | 0.109916711929767 | 4.8569375507996e-4 | 1.46733403998481 | 1.1829489376717 | 1.82008632522706 |
| GCST90277382 | PCOS | TAG (48:1) levels | Simple mode | 11 | 0.658892084549258 | 0.274460068399764 | 0.037272015871298 | 1.93264993509856 | 1.12856887807969 | 3.30962145437855 |
| GCST90277382 | PCOS | TAG (48:1) levels | Weighted mode | 11 | 0.651971136264458 | 0.287130172014526 | 0.0465194475490648 | 1.91932034475455 | 1.09329492016575 | 3.36943903958708 |
| GCST90277383 | PCOS | TAG (48:2) levels | MR Egger | 14 | 0.37646236142992 | 0.265214346347039 | 0.181215380486933 | 1.4571206944527 | 0.866444036665924 | 2.45047646282199 |
| GCST90277383 | PCOS | TAG (48:2) levels | Weighted median | 14 | 0.416765064402146 | 0.129780471683799 | 0.00132132242232725 | 1.51704606294156 | 1.1763251976953 | 1.95645622621663 |
| GCST90277383 | PCOS | TAG (48:2) levels | Inverse variance weighted | 14 | 0.311393382632649 | 0.0935565400685096 | 8.7347044610259e-4 | 1.36532621117735 | 1.13657864828015 | 1.64011145708978 |
| GCST90277383 | PCOS | TAG (48:2) levels | Simple mode | 14 | 0.481778818724302 | 0.229124223238324 | 0.0555400192662527 | 1.6189516639042 | 1.03323570691136 | 2.53669561797579 |
| GCST90277383 | PCOS | TAG (48:2) levels | Weighted mode | 14 | 0.500195253356709 | 0.211593288981065 | 0.0343215948345421 | 1.64904322049238 | 1.08923150571417 | 2.49657077378504 |
| GCST90277384 | PCOS | TAG (48:3) levels | MR Egger | 17 | 0.0279239826660875 | 0.26272643864659 | 0.916764336518385 | 1.02831751149457 | 0.614454843833084 | 1.72093509402563 |
| GCST90277384 | PCOS | TAG (48:3) levels | Weighted median | 17 | 0.45082326029833 | 0.120418315199354 | 1.8125092747779e-4 | 1.56960384626143 | 1.23961811760058 | 1.98743161238024 |
| GCST90277384 | PCOS | TAG (48:3) levels | Inverse variance weighted | 17 | 0.307069521065303 | 0.0925468681769938 | 9.0667948177231e-4 | 1.35943547418924 | 1.13391660205346 | 1.62980664110339 |
| GCST90277384 | PCOS | TAG (48:3) levels | Simple mode | 17 | 0.511823123109336 | 0.207376220102664 | 0.0252412691906184 | 1.66832999501879 | 1.11111690673766 | 2.50497940891882 |
| GCST90277384 | PCOS | TAG (48:3) levels | Weighted mode | 17 | 0.498852129152248 | 0.194505388250849 | 0.0207751738245657 | 1.64682983738568 | 1.12481836375429 | 2.41109907225535 |
| GCST90277385 | PCOS | TAG (49:1) levels | MR Egger | 11 | -0.118539238 | 0.225597280459936 | 0.611971268505829 | 0.888216963034834 | 0.57080370198494 | 1.38213780092764 |
| GCST90277385 | PCOS | TAG (49:1) levels | Weighted median | 11 | 0.349301448472579 | 0.143720581592683 | 0.015081314029781 | 1.41807660294327 | 1.06994699359548 | 1.87947745435267 |
| GCST90277385 | PCOS | TAG (49:1) levels | Inverse variance weighted | 11 | 0.261951464151907 | 0.115149008904541 | 0.0229124588872777 | 1.29946347033717 | 1.03692479684432 | 1.62847423060925 |
| GCST90277385 | PCOS | TAG (49:1) levels | Simple mode | 11 | 0.506621118079053 | 0.263282195951222 | 0.0832219871570879 | 1.65967386812054 | 0.990632168120229 | 2.7805652159964 |
| GCST90277385 | PCOS | TAG (49:1) levels | Weighted mode | 11 | 0.497222249094088 | 0.299194951279419 | 0.127520732078537 | 1.64414788849577 | 0.914662755003238 | 2.9554305829754 |
| GCST90277386 | PCOS | TAG (49:2) levels | MR Egger | 12 | -0.209319298 | 0.209809152629412 | 0.341970068369835 | 0.811136199719235 | 0.537651209978613 | 1.2237337557952 |
| GCST90277386 | PCOS | TAG (49:2) levels | Weighted median | 12 | 0.221279588363995 | 0.148314026463843 | 0.135707875746105 | 1.24767221643735 | 0.932938586950758 | 1.66858352890902 |
| GCST90277386 | PCOS | TAG (49:2) levels | Inverse variance weighted | 12 | 0.141154789952424 | 0.101539993574086 | 0.164486418844051 | 1.15160289074596 | 0.943778672472321 | 1.40519091674363 |
| GCST90277386 | PCOS | TAG (49:2) levels | Simple mode | 12 | 0.268368878299868 | 0.256111886765111 | 0.317182493211849 | 1.30782948096237 | 0.79167017488333 | 2.16051836426244 |
| GCST90277386 | PCOS | TAG (49:2) levels | Weighted mode | 12 | 0.289696318855892 | 0.257660184434244 | 0.284807685941833 | 1.33602170181482 | 0.806285288913285 | 2.21379952265523 |
| GCST90277387 | PCOS | TAG (50:1) levels | MR Egger | 11 | 0.0200089533484717 | 0.257258622530851 | 0.939706704426806 | 1.02021047428576 | 0.616178893051367 | 1.68916758360238 |
| GCST90277387 | PCOS | TAG (50:1) levels | Weighted median | 11 | 0.557649555769988 | 0.142566458210536 | 9.17223796373296e-5 | 1.74656247430476 | 1.32077580851948 | 2.30961262083456 |
| GCST90277387 | PCOS | TAG (50:1) levels | Inverse variance weighted | 11 | 0.452119479488778 | 0.103815104471433 | 1.33039422100246e-5 | 1.57163971607006 | 1.28228273297456 | 1.92629233289207 |
| GCST90277387 | PCOS | TAG (50:1) levels | Simple mode | 11 | 0.673030244111394 | 0.236621439895151 | 0.0174184968577058 | 1.96016811811289 | 1.2327558873751 | 3.11680446276152 |
| GCST90277387 | PCOS | TAG (50:1) levels | Weighted mode | 11 | 0.651030617634492 | 0.22572697656216 | 0.0162694030849391 | 1.91751603683904 | 1.23195919494013 | 2.98456942943926 |
| GCST90277388 | PCOS | TAG (50:2) levels | MR Egger | 9 | 0.0578724133327643 | 0.253573416171312 | 0.825993026415216 | 1.05957979883061 | 0.644596021049761 | 1.74172553572626 |
| GCST90277388 | PCOS | TAG (50:2) levels | Weighted median | 9 | 0.302723518581174 | 0.155902881083532 | 0.0521680723016669 | 1.35354018399337 | 0.997157918040969 | 1.83729276630939 |
| GCST90277388 | PCOS | TAG (50:2) levels | Inverse variance weighted | 9 | 0.244756507135881 | 0.110655348857605 | 0.0269748612620509 | 1.2773102594033 | 1.02826408223373 | 1.58667556998853 |
| GCST90277388 | PCOS | TAG (50:2) levels | Simple mode | 9 | 0.262005101396951 | 0.230447711128179 | 0.288469531723832 | 1.29953317184703 | 0.827230079866378 | 2.04149547487876 |
| GCST90277388 | PCOS | TAG (50:2) levels | Weighted mode | 9 | 0.393982698613599 | 0.18643816519255 | 0.0675352850731008 | 1.48287489266131 | 1.02897575497146 | 2.13699685017969 |
| GCST90277389 | PCOS | TAG (50:3) levels | MR Egger | 16 | 0.198803397597893 | 0.192733679142089 | 0.319801029342316 | 1.21994209877437 | 0.836143848161387 | 1.77990752145647 |
| GCST90277389 | PCOS | TAG (50:3) levels | Weighted median | 16 | 0.317276817529127 | 0.115618642632228 | 0.00606647415410089 | 1.37338269571494 | 1.09490136104117 | 1.72269402158349 |
| GCST90277389 | PCOS | TAG (50:3) levels | Inverse variance weighted | 16 | 0.243584177011389 | 0.0811995999474591 | 0.00270139271346707 | 1.27581370750572 | 1.08809989678234 | 1.49591101062763 |
| GCST90277389 | PCOS | TAG (50:3) levels | Simple mode | 16 | 0.322740019963734 | 0.218944923928562 | 0.161139336132218 | 1.38090629616516 | 0.899072114895527 | 2.1209669026496 |
| GCST90277389 | PCOS | TAG (50:3) levels | Weighted mode | 16 | 0.373883788416273 | 0.166059125677281 | 0.0397724603545875 | 1.45336824241732 | 1.04959870152082 | 2.01246366349978 |
| GCST90277390 | PCOS | TAG (50:4) levels | MR Egger | 19 | 0.0822636813672181 | 0.211769229440221 | 0.702498202662402 | 1.08574206203957 | 0.716910688906484 | 1.64432731095143 |
| GCST90277390 | PCOS | TAG (50:4) levels | Weighted median | 19 | 0.315232021683334 | 0.111933115024503 | 0.0048587319269943 | 1.37057727771509 | 1.10058638631352 | 1.70680111761241 |
| GCST90277390 | PCOS | TAG (50:4) levels | Inverse variance weighted | 19 | 0.200924068159956 | 0.0758553922463423 | 0.00807834598533206 | 1.22253193919924 | 1.05363648459787 | 1.41850093861611 |
| GCST90277390 | PCOS | TAG (50:4) levels | Simple mode | 19 | 0.38981584806885 | 0.238805577783139 | 0.119974996236014 | 1.47670883005928 | 0.924739609459614 | 2.35814379147158 |
| GCST90277390 | PCOS | TAG (50:4) levels | Weighted mode | 19 | 0.402063636924751 | 0.170532034163933 | 0.0299070053818535 | 1.49490646089914 | 1.07017356967015 | 2.08820829646053 |
| GCST90277391 | PCOS | TAG (50:5) levels | MR Egger | 11 | -0.045499981 | 0.178584370439551 | 0.804618226337903 | 0.955519620260924 | 0.673326216039579 | 1.35598128062477 |
| GCST90277391 | PCOS | TAG (50:5) levels | Weighted median | 11 | -0.108518724 | 0.124740052307409 | 0.384322842253947 | 0.897162096239853 | 0.70257071109671 | 1.14564956127055 |
| GCST90277391 | PCOS | TAG (50:5) levels | Inverse variance weighted | 11 | -0.053097678 | 0.0899020590827054 | 0.554777122185747 | 0.948287381465556 | 0.795085428027477 | 1.13100923013737 |
| GCST90277391 | PCOS | TAG (50:5) levels | Simple mode | 11 | -0.168487069 | 0.21528493913764 | 0.451982895701787 | 0.844942188943617 | 0.554080359155606 | 1.28849054268017 |
| GCST90277391 | PCOS | TAG (50:5) levels | Weighted mode | 11 | -0.21393519 | 0.228421101319476 | 0.371040541737866 | 0.807400711201523 | 0.516004110062005 | 1.2633541007462 |
| GCST90277392 | PCOS | TAG (51:1) levels | MR Egger | 13 | -0.15870742 | 0.266634946913853 | 0.563738624652297 | 0.853245965417191 | 0.505952789391103 | 1.43892610687426 |
| GCST90277392 | PCOS | TAG (51:1) levels | Weighted median | 13 | 0.0264014428653788 | 0.134954789801487 | 0.844898400764236 | 1.02675304843641 | 0.788116036797883 | 1.33764797726585 |
| GCST90277392 | PCOS | TAG (51:1) levels | Inverse variance weighted | 13 | 0.0805282380017328 | 0.109547136891572 | 0.462277829014094 | 1.08385945223522 | 0.874429023403881 | 1.34344958911209 |
| GCST90277392 | PCOS | TAG (51:1) levels | Simple mode | 13 | -0.212425448 | 0.282630359868641 | 0.46677639024313 | 0.808620598444946 | 0.464691770076569 | 1.40709888647635 |
| GCST90277392 | PCOS | TAG (51:1) levels | Weighted mode | 13 | -0.226601927 | 0.272333762996538 | 0.421617277823756 | 0.797238078189646 | 0.46749056964315 | 1.35957513282179 |
| GCST90277393 | PCOS | TAG (51:2) levels | MR Egger | 12 | 0.026606356108994 | 0.293213818182611 | 0.929490680257166 | 1.02696346529182 | 0.57805126092027 | 1.82449901997473 |
| GCST90277393 | PCOS | TAG (51:2) levels | Weighted median | 12 | 0.0304092813608314 | 0.136888373256829 | 0.824199792813847 | 1.03087636610558 | 0.788287876586086 | 1.34811927692889 |
| GCST90277393 | PCOS | TAG (51:2) levels | Inverse variance weighted | 12 | 0.0535402035191973 | 0.107035146128631 | 0.616926210886189 | 1.05499940560385 | 0.855346453889551 | 1.30125487837493 |
| GCST90277393 | PCOS | TAG (51:2) levels | Simple mode | 12 | -0.14014471 | 0.278396143334777 | 0.624610689739303 | 0.869232439946155 | 0.503686539105243 | 1.5000699363476 |
| GCST90277393 | PCOS | TAG (51:2) levels | Weighted mode | 12 | -0.051727501 | 0.231705461048372 | 0.827435080170989 | 0.949587593710735 | 0.602980630790503 | 1.49543211188592 |
| GCST90277394 | PCOS | TAG (51:3) levels | MR Egger | 16 | 0.231328911108107 | 0.206993352106033 | 0.282563872525337 | 1.26027368930258 | 0.839979275880702 | 1.89086780775996 |
| GCST90277394 | PCOS | TAG (51:3) levels | Weighted median | 16 | 0.270142245581303 | 0.113612783694391 | 0.017418859952951 | 1.31015080064144 | 1.04860550346991 | 1.63693125273652 |
| GCST90277394 | PCOS | TAG (51:3) levels | Inverse variance weighted | 16 | 0.166158268539108 | 0.0857274860269097 | 0.0525970412599501 | 1.18075996409022 | 0.998134138813677 | 1.39680032831599 |
| GCST90277394 | PCOS | TAG (51:3) levels | Simple mode | 16 | 0.310510535971168 | 0.195971873393531 | 0.133940233440046 | 1.3641213694135 | 0.929048499049607 | 2.00293861127178 |
| GCST90277394 | PCOS | TAG (51:3) levels | Weighted mode | 16 | 0.320219360112278 | 0.15057933124067 | 0.0504619661573114 | 1.37742988437229 | 1.02540111821274 | 1.85031306545565 |
| GCST90277395 | PCOS | TAG (51:4) levels | MR Egger | 15 | 0.0693345110389823 | 0.174208998637156 | 0.697091829293163 | 1.07179467634015 | 0.761766556683995 | 1.50799981720333 |
| GCST90277395 | PCOS | TAG (51:4) levels | Weighted median | 15 | 0.284232082427293 | 0.113198063174041 | 0.0120414567004441 | 1.32874127247082 | 1.06434956830997 | 1.65880968220884 |
| GCST90277395 | PCOS | TAG (51:4) levels | Inverse variance weighted | 15 | 0.207417076011014 | 0.080738335044664 | 0.0101991388356689 | 1.23049567499949 | 1.05039883964164 | 1.44147113367815 |
| GCST90277395 | PCOS | TAG (51:4) levels | Simple mode | 15 | 0.316945956820198 | 0.192561175658967 | 0.122030039927959 | 1.3729283725056 | 0.941318292420713 | 2.00243884688945 |
| GCST90277395 | PCOS | TAG (51:4) levels | Weighted mode | 15 | 0.305485692234135 | 0.16611276156684 | 0.0872142456542511 | 1.35728406527257 | 0.980105244793889 | 1.8796145042875 |
| GCST90277396 | PCOS | TAG (52:2) levels | MR Egger | 18 | 0.0713201558730064 | 0.187402568070103 | 0.708526156811781 | 1.07392499422976 | 0.743795700808834 | 1.55058020902411 |
| GCST90277396 | PCOS | TAG (52:2) levels | Weighted median | 18 | 0.230876256605707 | 0.114077713818167 | 0.0429855197159597 | 1.25970334983596 | 1.00731052992159 | 1.57533598870595 |
| GCST90277396 | PCOS | TAG (52:2) levels | Inverse variance weighted | 18 | 0.139227520565552 | 0.0782815517287867 | 0.0753138469813172 | 1.14938557911354 | 0.985896084583093 | 1.33998626237857 |
| GCST90277396 | PCOS | TAG (52:2) levels | Simple mode | 18 | 0.10643395072239 | 0.205189408512458 | 0.6106488192868 | 1.11230445711354 | 0.743982854112713 | 1.66297005162864 |
| GCST90277396 | PCOS | TAG (52:2) levels | Weighted mode | 18 | 0.267698626207693 | 0.166833504200864 | 0.127000239956748 | 1.30695319921419 | 0.942428672069185 | 1.81247315108299 |
| GCST90277397 | PCOS | TAG (52:3) levels | MR Egger | 20 | 0.0863339418830308 | 0.194002067462944 | 0.661613683305091 | 1.09017032105537 | 0.745343487101539 | 1.59452836105357 |
| GCST90277397 | PCOS | TAG (52:3) levels | Weighted median | 20 | 0.247637481651295 | 0.104775563117454 | 0.0181030223161239 | 1.28099546364974 | 1.04318379479714 | 1.573020388 |
| GCST90277397 | PCOS | TAG (52:3) levels | Inverse variance weighted | 20 | 0.0763319961349843 | 0.0794594232864191 | 0.336732603036226 | 1.07932084503068 | 0.923662555694913 | 1.2612111201599 |
| GCST90277397 | PCOS | TAG (52:3) levels | Simple mode | 20 | 0.195892818579797 | 0.210158269497438 | 0.362968556970251 | 1.21639652324028 | 0.805721290552354 | 1.83639245865863 |
| GCST90277397 | PCOS | TAG (52:3) levels | Weighted mode | 20 | 0.242908046411581 | 0.136006180302911 | 0.0900683411280416 | 1.27495138237347 | 0.976613731456272 | 1.66442573461687 |
| GCST90277398 | PCOS | TAG (52:4) levels | MR Egger | 15 | 0.342943055930747 | 0.255999767804547 | 0.203317224334982 | 1.40908852040754 | 0.853152907576583 | 2.32728557883522 |
| GCST90277398 | PCOS | TAG (52:4) levels | Weighted median | 15 | 0.249176840172338 | 0.112074932929091 | 0.0261951916488476 | 1.28296889345043 | 1.02994970569943 | 1.59814520306467 |
| GCST90277398 | PCOS | TAG (52:4) levels | Inverse variance weighted | 15 | 0.112601035108334 | 0.0953856973428362 | 0.237808830676821 | 1.11918532821148 | 0.928342137321942 | 1.3492609551229 |
| GCST90277398 | PCOS | TAG (52:4) levels | Simple mode | 15 | 0.314124701968893 | 0.206363964303785 | 0.150225325623394 | 1.36906045043668 | 0.913612582198508 | 2.05155506116118 |
| GCST90277398 | PCOS | TAG (52:4) levels | Weighted mode | 15 | 0.294194189943682 | 0.133879434924588 | 0.0453158225642835 | 1.34204448990845 | 1.03230121295536 | 1.7447266265796 |
| GCST90277399 | PCOS | TAG (52:5) levels | MR Egger | 14 | -0.072310738 | 0.228050325857731 | 0.756629879359607 | 0.930241789071637 | 0.594943178058603 | 1.45450829263893 |
| GCST90277399 | PCOS | TAG (52:5) levels | Weighted median | 14 | 0.252392734676032 | 0.121147242065223 | 0.0372188601746964 | 1.28710142739834 | 1.01505636221528 | 1.63205723945751 |
| GCST90277399 | PCOS | TAG (52:5) levels | Inverse variance weighted | 14 | 0.0720503223662115 | 0.087169208550358 | 0.408488179528109 | 1.07470942462431 | 0.905922673071388 | 1.27494363670187 |
| GCST90277399 | PCOS | TAG (52:5) levels | Simple mode | 14 | 0.296072611520883 | 0.241194309204286 | 0.241388939228138 | 1.34456778439932 | 0.838057777047357 | 2.157205119 |
| GCST90277399 | PCOS | TAG (52:5) levels | Weighted mode | 14 | 0.296072611520883 | 0.171034920040387 | 0.107087988257983 | 1.34456778439932 | 0.961600849519086 | 1.88005504336716 |
| GCST90277400 | PCOS | TAG (52:6) levels | MR Egger | 15 | -0.01118375 | 0.247347867627858 | 0.964623375824692 | 0.988878555323463 | 0.608970427919181 | 1.60579356951697 |
| GCST90277400 | PCOS | TAG (52:6) levels | Weighted median | 15 | 0.149066257599613 | 0.120806108008886 | 0.217229061207865 | 1.16074989516306 | 0.916023083683401 | 1.47085847848211 |
| GCST90277400 | PCOS | TAG (52:6) levels | Inverse variance weighted | 15 | 0.0996478782511951 | 0.096538919584904 | 0.301976467972799 | 1.10478183186613 | 0.914325719324996 | 1.33491038283659 |
| GCST90277400 | PCOS | TAG (52:6) levels | Simple mode | 15 | -0.2386495 | 0.257944915757428 | 0.370537859608261 | 0.787690919635242 | 0.47510400789929 | 1.30593927763147 |
| GCST90277400 | PCOS | TAG (52:6) levels | Weighted mode | 15 | 0.363426625301279 | 0.24748514792385 | 0.164082294073648 | 1.43824932192283 | 0.88546330309884 | 2.33613420767657 |
| GCST90277401 | PCOS | TAG (53:2) levels | MR Egger | 14 | 0.367219797618861 | 0.27206156085616 | 0.202002992943523 | 1.44371520940942 | 0.847028563583844 | 2.46073591315644 |
| GCST90277401 | PCOS | TAG (53:2) levels | Weighted median | 14 | 0.0639585226830253 | 0.119679496344209 | 0.593054416485854 | 1.06604818102618 | 0.843147563902297 | 1.34787642510572 |
| GCST90277401 | PCOS | TAG (53:2) levels | Inverse variance weighted | 14 | 0.131739537636552 | 0.0857609699208664 | 0.124507818185064 | 1.14081114220085 | 0.964300835139563 | 1.34963075291877 |
| GCST90277401 | PCOS | TAG (53:2) levels | Simple mode | 14 | -0.054534443 | 0.215123869831684 | 0.803844847173253 | 0.946925892993281 | 0.621153386580711 | 1.44355430750696 |
| GCST90277401 | PCOS | TAG (53:2) levels | Weighted mode | 14 | -0.037707025 | 0.178315780174092 | 0.835805727043062 | 0.962995032965822 | 0.678951247655435 | 1.36587043137371 |
| GCST90277402 | PCOS | TAG (53:3) levels | MR Egger | 19 | 0.234507813698601 | 0.19613090340008 | 0.248237932332586 | 1.26428635114967 | 0.860786513615529 | 1.85692962473304 |
| GCST90277402 | PCOS | TAG (53:3) levels | Weighted median | 19 | 0.247725354001969 | 0.100133185699251 | 0.0133625187606647 | 1.28110803267812 | 1.05281161080831 | 1.55890928115079 |
| GCST90277402 | PCOS | TAG (53:3) levels | Inverse variance weighted | 19 | 0.114161553410968 | 0.0756194283280297 | 0.131123696469268 | 1.1209332008391 | 0.966520735727785 | 1.30001477909035 |
| GCST90277402 | PCOS | TAG (53:3) levels | Simple mode | 19 | 0.14036748653332 | 0.199841678528936 | 0.491418095978746 | 1.15069658666759 | 0.777771730499352 | 1.70243090953992 |
| GCST90277402 | PCOS | TAG (53:3) levels | Weighted mode | 19 | 0.236145993728853 | 0.139848483923139 | 0.108547506879487 | 1.26635917717018 | 0.962754304971878 | 1.66570594109157 |
| GCST90277403 | PCOS | TAG (53:4) levels | MR Egger | 17 | 0.182177567328094 | 0.194874048161818 | 0.364673450796161 | 1.19982722508015 | 0.818914523841872 | 1.75791896239651 |
| GCST90277403 | PCOS | TAG (53:4) levels | Weighted median | 17 | 0.0779717001295875 | 0.11018244631476 | 0.479156478482427 | 1.08109206347186 | 0.871110978986704 | 1.34168903606448 |
| GCST90277403 | PCOS | TAG (53:4) levels | Inverse variance weighted | 17 | 0.0715957992714952 | 0.076799759518037 | 0.351212565267955 | 1.07422105536667 | 0.924103011373536 | 1.24872537107947 |
| GCST90277403 | PCOS | TAG (53:4) levels | Simple mode | 17 | -0.021822329 | 0.229134913107702 | 0.92530845454862 | 0.97841405541298 | 0.624423310317221 | 1.53308508508971 |
| GCST90277403 | PCOS | TAG (53:4) levels | Weighted mode | 17 | 0.224223308776195 | 0.159670249194673 | 0.179346649733542 | 1.25135042576243 | 0.915092267817837 | 1.71116940129967 |
| GCST90277404 | PCOS | TAG (54:3) levels | MR Egger | 20 | 0.0776141137520138 | 0.186281823142684 | 0.681861610912138 | 1.08070554878738 | 0.750137872304062 | 1.55694643118407 |
| GCST90277404 | PCOS | TAG (54:3) levels | Weighted median | 20 | 0.188249263245555 | 0.0958644294346803 | 0.04956454986866 | 1.20713437208319 | 1.00035504456699 | 1.45665621438979 |
| GCST90277404 | PCOS | TAG (54:3) levels | Inverse variance weighted | 20 | 0.10885089414075 | 0.0712259542359936 | 0.126451072729453 | 1.11499608549684 | 0.969716055950214 | 1.28204154509441 |
| GCST90277404 | PCOS | TAG (54:3) levels | Simple mode | 20 | 0.198334690720752 | 0.190388804193588 | 0.310609439081212 | 1.21937043750421 | 0.839601952523117 | 1.77091568140233 |
| GCST90277404 | PCOS | TAG (54:3) levels | Weighted mode | 20 | 0.223700707553697 | 0.134753734911688 | 0.113314769317822 | 1.25069663934982 | 0.960389245272275 | 1.6287584345423 |
| GCST90277405 | PCOS | TAG (54:4) levels | MR Egger | 20 | 0.187546923173729 | 0.208411628467109 | 0.38006221577719 | 1.20628685090048 | 0.801764890068548 | 1.81490607119375 |
| GCST90277405 | PCOS | TAG (54:4) levels | Weighted median | 20 | 0.225233402629686 | 0.102898597250891 | 0.0286050536223432 | 1.25261504572095 | 1.02383169424321 | 1.53252186036915 |
| GCST90277405 | PCOS | TAG (54:4) levels | Inverse variance weighted | 20 | 0.0702384905566132 | 0.0784857062009943 | 0.370829429841844 | 1.07276399483068 | 0.919805086764669 | 1.25115919140326 |
| GCST90277405 | PCOS | TAG (54:4) levels | Simple mode | 20 | 0.250256831554927 | 0.206899603358213 | 0.241284550030422 | 1.28435523728443 | 0.856187066549502 | 1.92664481862338 |
| GCST90277405 | PCOS | TAG (54:4) levels | Weighted mode | 20 | 0.240507608088148 | 0.12996101257951 | 0.0798371839868248 | 1.2718946104787 | 0.985884593296879 | 1.6408775541922 |
| GCST90277406 | PCOS | TAG (54:5) levels | MR Egger | 16 | 0.321176257566812 | 0.240496496007304 | 0.20302964926875 | 1.37874857434737 | 0.860538541559281 | 2.20902090895361 |
| GCST90277406 | PCOS | TAG (54:5) levels | Weighted median | 16 | 0.231910700028273 | 0.112253106032194 | 0.038832026936056 | 1.26100711590044 | 1.01196563441949 | 1.57133690341543 |
| GCST90277406 | PCOS | TAG (54:5) levels | Inverse variance weighted | 16 | 0.119086879955601 | 0.0888089859072481 | 0.179942279693233 | 1.12646778150796 | 0.946505277613674 | 1.34064721326719 |
| GCST90277406 | PCOS | TAG (54:5) levels | Simple mode | 16 | 0.217907119208783 | 0.195462169814474 | 0.282466933620623 | 1.24347156763222 | 0.84772521583899 | 1.8239654909633 |
| GCST90277406 | PCOS | TAG (54:5) levels | Weighted mode | 16 | 0.251923880668263 | 0.144260731494476 | 0.101197150306447 | 1.28649810618154 | 0.969643158444247 | 1.70689326562587 |
| GCST90277407 | PCOS | TAG (54:6) levels | MR Egger | 9 | 0.67619442997898 | 0.242826375548018 | 0.0271149250111751 | 1.96638027740058 | 1.22171393048556 | 3.16494008856331 |
| GCST90277407 | PCOS | TAG (54:6) levels | Weighted median | 9 | 0.293335756459403 | 0.145983520078686 | 0.0444972917651938 | 1.34089292832115 | 1.00723409767851 | 1.78508039924951 |
| GCST90277407 | PCOS | TAG (54:6) levels | Inverse variance weighted | 9 | 0.268234157435956 | 0.107469416159442 | 0.0125633922713469 | 1.30765330091267 | 1.05928494654628 | 1.61425607053417 |
| GCST90277407 | PCOS | TAG (54:6) levels | Simple mode | 9 | 0.27710120643215 | 0.233730186325031 | 0.26981370131084 | 1.31929988591295 | 0.834427048791598 | 2.0859249367462 |
| GCST90277407 | PCOS | TAG (54:6) levels | Weighted mode | 9 | 0.327316729057942 | 0.183688466321622 | 0.112621388691913 | 1.38724078707315 | 0.967816607290936 | 1.98843147226635 |
| GCST90277408 | PCOS | TAG (54:7) levels | MR Egger | 16 | 0.374281817202822 | 0.236537668173435 | 0.135895588800443 | 1.45394683995686 | 0.914541883901448 | 2.31149764776473 |
| GCST90277408 | PCOS | TAG (54:7) levels | Weighted median | 16 | 0.0124348106676016 | 0.123824992955877 | 0.920008937691795 | 1.01251244437888 | 0.794325322542387 | 1.29063171087233 |
| GCST90277408 | PCOS | TAG (54:7) levels | Inverse variance weighted | 16 | 0.0695604227759204 | 0.0924634972071979 | 0.451869797664901 | 1.0720368346892999 | 0.89434110107637 | 1.28503875484138 |
| GCST90277408 | PCOS | TAG (54:7) levels | Simple mode | 16 | -0.080740649 | 0.23637376896795 | 0.737404907375296 | 0.922432894641759 | 0.580402624659362 | 1.46602101535388 |
| GCST90277408 | PCOS | TAG (54:7) levels | Weighted mode | 16 | -0.051263465 | 0.227178795180207 | 0.824517370410524 | 0.950028338158913 | 0.608636600950146 | 1.48291088951273 |
| GCST90277409 | PCOS | TAG (56:3) levels | MR Egger | 19 | 0.0142924417193895 | 0.211410199118725 | 0.946888642726578 | 1.01439506700363 | 0.670272087321798 | 1.53519350040795 |
| GCST90277409 | PCOS | TAG (56:3) levels | Weighted median | 19 | 0.176407151063068 | 0.105479204593506 | 0.094438505144423 | 1.19292365992372 | 0.970123311855553 | 1.46689275581257 |
| GCST90277409 | PCOS | TAG (56:3) levels | Inverse variance weighted | 19 | 0.046930351336466 | 0.0828201009503119 | 0.570949198433527 | 1.04804901132463 | 0.8910123003267 | 1.23276270118358 |
| GCST90277409 | PCOS | TAG (56:3) levels | Simple mode | 19 | 0.200441100209675 | 0.186862175827797 | 0.29759128040741 | 1.22194163801416 | 0.847208235063047 | 1.76242546391398 |
| GCST90277409 | PCOS | TAG (56:3) levels | Weighted mode | 19 | 0.205336985729607 | 0.157138751593345 | 0.207756140047966 | 1.22793879309913 | 0.902438290406864 | 1.67084408499327 |
| GCST90277410 | PCOS | TAG (56:4) levels | MR Egger | 12 | 0.390217638440137 | 0.311064493304255 | 0.238203221940452 | 1.47730227666097 | 0.802945234536752 | 2.71802100910009 |
| GCST90277410 | PCOS | TAG (56:4) levels | Weighted median | 12 | 0.190168391302651 | 0.120625466319865 | 0.114906144727462 | 1.20945324191771 | 0.954796048886493 | 1.53203099875747 |
| GCST90277410 | PCOS | TAG (56:4) levels | Inverse variance weighted | 12 | 0.122778176345054 | 0.0936405891241269 | 0.189802337030318 | 1.13063359185285 | 0.941051531567018 | 1.35840841457156 |
| GCST90277410 | PCOS | TAG (56:4) levels | Simple mode | 12 | 0.137065672533621 | 0.195817267809332 | 0.498484138462278 | 1.14690346610366 | 0.781346807215208 | 1.68348747113814 |
| GCST90277410 | PCOS | TAG (56:4) levels | Weighted mode | 12 | 0.232110139977569 | 0.177511595646101 | 0.217685735486667 | 1.26125863617646 | 0.890642125134499 | 1.78609713423276 |
| GCST90277411 | PCOS | TAG (56:5) levels | MR Egger | 16 | 0.395452505791128 | 0.212580489616897 | 0.0839866182705591 | 1.48505603535885 | 0.979017996724582 | 2.2526566779509 |
| GCST90277411 | PCOS | TAG (56:5) levels | Weighted median | 16 | 0.0764519782391998 | 0.104992363122696 | 0.466511339752838 | 1.07945035198589 | 0.878681268950916 | 1.32609297998767 |
| GCST90277411 | PCOS | TAG (56:5) levels | Inverse variance weighted | 16 | 0.11023480387078 | 0.076349764900646 | 0.148791507679227 | 1.11654020764489 | 0.96135576526141 | 1.29677490928523 |
| GCST90277411 | PCOS | TAG (56:5) levels | Simple mode | 16 | 0.0185751078142029 | 0.188492192119903 | 0.922803784870392 | 1.01874869828412 | 0.704075567250033 | 1.47405897680729 |
| GCST90277411 | PCOS | TAG (56:5) levels | Weighted mode | 16 | 0.067773139201688 | 0.150585588535736 | 0.659100459063848 | 1.07012251209194 | 0.796622300257844 | 1.43752213629383 |
| GCST90277412 | PCOS | TAG (56:6) levels | MR Egger | 20 | 0.135117728893929 | 0.179114485762969 | 0.460385992072719 | 1.144671537 | 0.805778278361032 | 1.62609611547908 |
| GCST90277412 | PCOS | TAG (56:6) levels | Weighted median | 20 | 0.0235477092996028 | 0.0962384950063343 | 0.806703616926797 | 1.02382714565748 | 0.847826094965626 | 1.23636442710298 |
| GCST90277412 | PCOS | TAG (56:6) levels | Inverse variance weighted | 20 | 0.117881103534961 | 0.0699490419736942 | 0.0919417801663994 | 1.12511033177331 | 0.98096448911305 | 1.29043739372014 |
| GCST90277412 | PCOS | TAG (56:6) levels | Simple mode | 20 | 0.0567457926944339 | 0.175409942890965 | 0.749847343982199 | 1.05838672655741 | 0.7504684290329 | 1.492644353 |
| GCST90277412 | PCOS | TAG (56:6) levels | Weighted mode | 20 | 0.0299144351972946 | 0.115203822280488 | 0.797914794306835 | 1.03036636708667 | 0.822106725094547 | 1.29138324504191 |
| GCST90277413 | PCOS | TAG (56:7) levels | MR Egger | 18 | 0.114038104476795 | 0.281539882455694 | 0.690803836088545 | 1.12079483137114 | 0.645467728104129 | 1.94615625124732 |
| GCST90277413 | PCOS | TAG (56:7) levels | Weighted median | 18 | 0.0228634175225954 | 0.111407432428638 | 0.837397549710797 | 1.02312678881217 | 0.822427332296201 | 1.27280354735109 |
| GCST90277413 | PCOS | TAG (56:7) levels | Inverse variance weighted | 18 | 0.0420188140671623 | 0.0915146578072269 | 0.646127560068355 | 1.04291410002211 | 0.871665163841602 | 1.24780691616876 |
| GCST90277413 | PCOS | TAG (56:7) levels | Simple mode | 18 | 0.015144947303547 | 0.187599083368257 | 0.936599177346817 | 1.01526021318137 | 0.702893947144726 | 1.46644213491405 |
| GCST90277413 | PCOS | TAG (56:7) levels | Weighted mode | 18 | 0.0202766018594898 | 0.170664847253852 | 0.906818937160503 | 1.02048356864514 | 0.730353585243823 | 1.42586650482049 |
| GCST90277414 | PCOS | TAG (56:8) levels | MR Egger | 15 | 0.0851345120251729 | 0.224110361431126 | 0.710169888230288 | 1.08886352208567 | 0.701789486730995 | 1.68942936898578 |
| GCST90277414 | PCOS | TAG (56:8) levels | Weighted median | 15 | -0.049795786 | 0.121145632582989 | 0.68104269102651 | 0.95142369904137 | 0.750330708099451 | 1.20641078037497 |
| GCST90277414 | PCOS | TAG (56:8) levels | Inverse variance weighted | 15 | -0.016140152 | 0.0826661155389868 | 0.845201092356051 | 0.98398940228422 | 0.836803721417555 | 1.15706362080639 |
| GCST90277414 | PCOS | TAG (56:8) levels | Simple mode | 15 | -0.105484109 | 0.231301614135097 | 0.65535115451668 | 0.899888772781682 | 0.571874754182015 | 1.41604398070837 |
| GCST90277414 | PCOS | TAG (56:8) levels | Weighted mode | 15 | -0.055752323 | 0.213326620371013 | 0.797630222286014 | 0.945773353412482 | 0.62258662811622 | 1.43672734946391 |
| GCST90277415 | PCOS | TAG (58:7) levels | MR Egger | 10 | -0.254243814 | 0.336820630606756 | 0.471982511103286 | 0.775502700609316 | 0.40075209895049 | 1.50068942926894 |
| GCST90277415 | PCOS | TAG (58:7) levels | Weighted median | 10 | 2.1380113647672e-4 | 0.119294636009027 | 0.998570023428868 | 1.00021382399357 | 0.791675506260412 | 1.26368402937397 |
| GCST90277415 | PCOS | TAG (58:7) levels | Inverse variance weighted | 10 | -0.109545396 | 0.0923947641598427 | 0.235771051403219 | 0.896241477890259 | 0.747785480065146 | 1.07417007698643 |
| GCST90277415 | PCOS | TAG (58:7) levels | Simple mode | 10 | 0.0391343083098508 | 0.178829808176376 | 0.831660206866088 | 1.03991014284493 | 0.732441272244095 | 1.47645025775033 |
| GCST90277415 | PCOS | TAG (58:7) levels | Weighted mode | 10 | 0.031590735296114 | 0.170581010843569 | 0.857182435356727 | 1.03209501879436 | 0.738785212844177 | 1.44185361225523 |
| GCST90277416 | PCOS | TAG (58:8) levels | MR Egger | 15 | 0.108198505478884 | 0.257387769498614 | 0.681079434970598 | 1.11426891191832 | 0.672817255916473 | 1.84536766432426 |
| GCST90277416 | PCOS | TAG (58:8) levels | Weighted median | 15 | 0.0311090818676731 | 0.12557556072668 | 0.804341789169564 | 1.03159802638874 | 0.806526102198281 | 1.31947928919913 |
| GCST90277416 | PCOS | TAG (58:8) levels | Inverse variance weighted | 15 | -0.001408629 | 0.0993197206901875 | 0.988684166814672 | 0.998592362978926 | 0.821950354918978 | 1.2131957866216 |
| GCST90277416 | PCOS | TAG (58:8) levels | Simple mode | 15 | 0.0908503511968972 | 0.264126448030577 | 0.735983843749617 | 1.09510511182629 | 0.65256959469074 | 1.83774300198035 |
| GCST90277416 | PCOS | TAG (58:8) levels | Weighted mode | 15 | 0.121207464779819 | 0.255780101278559 | 0.642895226947534 | 1.1288590865769 | 0.683778302037384 | 1.86364912947699 |

| **Table S9. Results of sensitivity analysis between lipidomics and PCOS** | | | | | | | | | | | |
| --- | --- | --- | --- | --- | --- | --- | --- | --- | --- | --- | --- |
| **Expourse** | **Outcome** | **Heterogeneity test** | | | | **Pleiotropy test** | | | | **Causal direction** | |
| **IVW Q** | **IVW Q_pval** | **MR Egger Q** | **MR Egger Q_pval** | **MR Egger_intercept** | **MR Egger_pval** | **RSSobs** | **Global pval** | **Correct_direction** | **Steiger_pval** |
| CE (27:1/16:1) levels | PCOS | 10.4342791354429 | 0.729793635121629 | 7.13613480455377 | 0.895000241628077 | -0.067313119 | 0.0924810463131344 | 11.8682668089195 | 0.768 | TRUE | 1.30658729565496e-78 |
| CE (27:1/20:2) levels | PCOS | 17.9780707744828 | 0.457098131389367 | 17.9424800289585 | 0.392478343255956 | 0.00445983713939104 | 0.856473504186391 | 19.8290333690972 | 0.499 | TRUE | 2.369208068902e-131 |
| DAG (16:1_18:1) levels | PCOS | 6.95394301716018 | 0.860642117106272 | 6.08308117328586 | 0.867763663802146 | 0.0330867681239353 | 0.370748416583354 | 8.25331292298189 | 0.859 | TRUE | 2.21603682985989e-71 |
| DAG (18:1_18:1) levels | PCOS | 16.1562354054076 | 0.581644541626489 | 14.8417264023125 | 0.606880851277529 | 0.0288239465948854 | 0.267461925957863 | 18.0441692948154 | 0.581 | TRUE | 2.77859576877503e-126 |
| DAG (18:1_18:2) levels | PCOS | 25.9228458542002 | 0.304522052313915 | 25.8983317185691 | 0.256072754292387 | -0.003396228 | 0.886572791358667 | 28.2274848078186 | 0.349 | TRUE | 1.9977611725616296e-162 |
| PC (15:0_18:1) levels | PCOS | 2.49799923397702 | 0.927247649315898 | 1.94749044527773 | 0.924463952211182 | 0.0258862310905704 | 0.486128164757356 | 3.30098934011174 | 0.934 | TRUE | 4.81213429464521e-41 |
| PC (17:0_18:2) levels | PCOS | 10.6851140045189 | 0.637177787343252 | 7.13359929320071 | 0.848659856731921 | -0.060512473 | 0.0839363965212217 | 12.304119990324 | 0.668 | TRUE | 2.0046550935188602e-74 |
| PC (18:0_18:1) levels | PCOS | 15.3951116712007 | 0.567045222809832 | 15.0300312075675 | 0.522440094119337 | 0.0159393701234403 | 0.554169867992073 | 17.4451382027962 | 0.564 | TRUE | 1.3831751174152297e-89 |
| PC (18:0_22:5) levels | PCOS | 20.3057105515796 | 0.258892095684189 | 20.2982274308396 | 0.207087947631293 | -0.001697117 | 0.93973328459283 | 24.5919763366336 | 0.262 | TRUE | 1.2320991897867198e-147 |
| PC (O-16:0_16:0) levels | PCOS | 1.3201152860409 | 0.970536946641277 | 1.00838225433391 | 0.96188685693065 | 0.0311748049536636 | 0.60069572793177 | 1.77853285163657 | 0.968 | TRUE | 6.39630547211487e-33 |
| PC (O-17:0_17:1) levels | PCOS | 14.0327823179519 | 0.447271598191609 | 13.4313197505268 | 0.415074050258422 | -0.032848868 | 0.4590939945405 | 16.1380595720276 | 0.471 | TRUE | 2.4117859522736697e-75 |
| PI (16:0_18:2) levels | PCOS | 23.210094746083 | 0.182645215417936 | 22.491962110669 | 0.166531841827833 | 0.0220656616337259 | 0.471327484537095 | 25.5193346906481 | 0.238 | TRUE | 2.3126901636165596e-152 |
| PI (18:0_18:1) levels | PCOS | 13.9392840640799 | 0.530138884849793 | 13.9295439628448 | 0.454973225118865 | 0.00257352515501665 | 0.922782025456992 | 15.6826875303569 | 0.564 | TRUE | 1.8442163707364296e-164 |
| PI (18:0_18:2) levels | PCOS | 34.7054225330588 | 0.0415787962651543 | 33.2963530437544 | 0.0430325681363994 | 0.0186618143714997 | 0.356549693571787 | 38.092300160718104 | 0.052 | TRUE | 0 |
| PI (18:1_18:1) levels | PCOS | 12.1715862583232 | 0.665997579527416 | 9.88173356254533 | 0.770777953258523 | 0.039124007 | 0.152466407147394 | 13.9755457003494 | 0.677 | TRUE | 1.51419083452433e-125 |
| TAG (48:1) levels | PCOS | 10.6442005655373 | 0.385901226037417 | 10.0848799133945 | 0.343657528750663 | 0.0271895484282061 | 0.497754463042323 | 12.9363573063905 | 0.426 | TRUE | 3.09645764777846e-58 |
| TAG (48:2) levels | PCOS | 10.1368820688144 | 0.682704554519345 | 10.0681329351086 | 0.60998333181802 | -0.009864926 | 0.797613676567001 | 11.8806397955222 | 0.711 | TRUE | 4.91750546558038e-78 |
| TAG (48:3) levels | PCOS | 19.5745627259068 | 0.239996072988289 | 18.029303335269798 | 0.261128130125134 | 0.0404906066377813 | 0.274652965380276 | 22.0339675868309 | 0.278 | TRUE | 3.453479883189549e-95 |
| TAG (49:1) levels | PCOS | 12.4127840433262 | 0.258379603436504 | 8.81255090402226 | 0.454754398289834 | 0.0579732385376163 | 0.0902584668322988 | 15.3143846790679 | 0.259 | TRUE | 1.37549256203422e-52 |
| TAG (50:1) levels | PCOS | 8.66936216866003 | 0.563743194614397 | 5.2992430182527 | 0.807481344275557 | 0.058233414278975 | 0.0995758589261585 | 10.3028139599971 | 0.626 | TRUE | 1.75456851514499e-62 |
| TAG (50:2) levels | PCOS | 6.46670127664858 | 0.595103472119551 | 5.79576186714338 | 0.563789501141117 | 0.0316116063238785 | 0.439716817145287 | 8.56675817737055 | 0.617 | TRUE | 4.35187255898722e-59 |
| TAG (50:3) levels | PCOS | 12.8579737168519 | 0.613267068051172 | 12.7923394083402 | 0.542936365838749 | 0.00700582683131749 | 0.80152876954355 | 14.910554406402 | 0.613 | TRUE | 1.2230179807641298e-106 |
| TAG (50:4) levels | PCOS | 17.7983052965291 | 0.469012278328205 | 17.4276895311022 | 0.425773444410476 | 0.0160972449493695 | 0.555596481159657 | 20.270429559688 | 0.45 | TRUE | 1.73704419565791e-122 |
| TAG (51:4) levels | PCOS | 15.6418485818843 | 0.335731788941553 | 14.7316095558903 | 0.324406138576996 | 0.0252145393029217 | 0.386420169415424 | 18.0237650897825 | 0.341 | TRUE | 4.48530508864949e-92 |
| TAG (54:6) levels | PCOS | 5.16553478256573 | 0.739745930574209 | 1.65542874310104 | 0.976436119001233 | -0.058082001 | 0.103141992696515 | 6.32796918231674 | 0.78 | TRUE | 1.59708045680105e-60 |

| **Table S10. Results of inverse MR Analysis between lipidomics and PCOS** | | | | | | | | | | | |
| --- | --- | --- | --- | --- | --- | --- | --- | --- | --- | --- | --- |
| **outcome** | **exposure** | **method** | **nsnp** | **b** | **se** | **pval** | **lo_ci** | **up_ci** | **or** | **or_lci95** | **or_uci95** |
| CE (27:1/16:1) levels | PCOS | MR Egger | 26 | -0.130809527 | 0.0493981512309386 | 0.0140821726617369 | -0.227629903 | -0.033989151 | 0.877384876540803 | 0.796418957177922 | 0.966581991355767 |
| CE (27:1/16:1) levels | PCOS | Weighted median | 26 | -0.044088359 | 0.0292523953511612 | 0.131766855970844 | -0.101423054 | 0.0132463357198386 | 0.956869405552655 | 0.903550701228486 | 1.01333445709004 |
| CE (27:1/16:1) levels | PCOS | Inverse variance weighted | 26 | -0.050328589 | 0.0203851313105876 | 0.0135533940749177 | -0.090283447 | -0.010373732 | 0.950916911928539 | 0.91367217112723 | 0.989679889534242 |
| CE (27:1/16:1) levels | PCOS | Simple mode | 26 | 0.00902653679233201 | 0.0613920586415495 | 0.884286846986873 | -0.111301898 | 0.129354971729769 | 1.00906739883059 | 0.894668609360116 | 1.13809404368281 |
| CE (27:1/16:1) levels | PCOS | Weighted mode | 26 | -0.009536075 | 0.0505946151682963 | 0.852022010223295 | -0.108701521 | 0.0896293707456498 | 0.990509249192841 | 0.8969981129017 | 1.09376882584822 |
| CE (27:1/20:2) levels | PCOS | MR Egger | 26 | 0.102779428022974 | 0.0550600020070564 | 0.0742107429524684 | -0.005138176 | 0.210697031956805 | 1.10824693389757 | 0.994875001935298 | 1.23453827275202 |
| CE (27:1/20:2) levels | PCOS | Weighted median | 26 | 0.0461399044798155 | 0.0339892100925981 | 0.174626580761837 | -0.020478947 | 0.112758756261308 | 1.04722091160554 | 0.979729322203262 | 1.11936186133298 |
| CE (27:1/20:2) levels | PCOS | Inverse variance weighted | 26 | 0.0307041731111936 | 0.0226455930732305 | 0.175144850775147 | -0.013681189 | 0.0750895355347254 | 1.03118040786909 | 0.986411972817979 | 1.07798066413907 |
| CE (27:1/20:2) levels | PCOS | Simple mode | 26 | -0.059245638 | 0.069669789232159 | 0.403186332135352 | -0.195798425 | 0.0773071489249712 | 0.94247523301816 | 0.822177948606631 | 1.08037386110634 |
| CE (27:1/20:2) levels | PCOS | Weighted mode | 26 | 0.108127030424672 | 0.0557576105951445 | 0.063838117385586 | -0.001157886 | 0.217411947191155 | 1.11418927233359 | 0.998842783749924 | 1.24285598772876 |
| DAG (16:1_18:1) levels | PCOS | MR Egger | 26 | -0.080789727 | 0.0586686775366353 | 0.181206283029258 | -0.195780335 | 0.0342008812826256 | 0.92238762455409 | 0.822192822108065 | 1.03479245628675 |
| DAG (16:1_18:1) levels | PCOS | Weighted median | 26 | -0.04856754 | 0.0314706682562676 | 0.122766809217033 | -0.110250049 | 0.0131149700977223 | 0.952592999302418 | 0.895610160452176 | 1.01320134852181 |
| DAG (16:1_18:1) levels | PCOS | Inverse variance weighted | 26 | -0.039896449 | 0.0239881148527176 | 0.0962772772186923 | -0.086913154 | 0.00712025622575899 | 0.960888935120853 | 0.916756708832041 | 1.00714566552122 |
| DAG (16:1_18:1) levels | PCOS | Simple mode | 26 | -0.016808292 | 0.0567915651350965 | 0.769701666212526 | -0.12811976 | 0.094503175679671 | 0.983332179226419 | 0.879748014521329 | 1.09911265355716 |
| DAG (16:1_18:1) levels | PCOS | Weighted mode | 26 | -0.04104679 | 0.04496838735544 | 0.370070999371789 | -0.129184829 | 0.0470912492805886 | 0.959784220654827 | 0.878811520545003 | 1.04821765382264 |
| DAG (18:1_18:1) levels | PCOS | MR Egger | 26 | -0.017730274 | 0.0596349171754571 | 0.768785300182367 | -0.134614712 | 0.0991541637153466 | 0.98242598250582 | 0.874052609141474 | 1.10423651964215 |
| DAG (18:1_18:1) levels | PCOS | Weighted median | 26 | -0.033717592 | 0.0307135194426971 | 0.272287706710683 | -0.09391609 | 0.0264809064024036 | 0.966844510995669 | 0.910359147442301 | 1.02683464110707 |
| DAG (18:1_18:1) levels | PCOS | Inverse variance weighted | 26 | -0.021277596 | 0.0241250862831331 | 0.377793176065726 | -0.068562765 | 0.0260075732501684 | 0.978947175159742 | 0.933734852415217 | 1.02634872123964 |
| DAG (18:1_18:1) levels | PCOS | Simple mode | 26 | -0.052886635 | 0.0541331981969798 | 0.337942614475509 | -0.158987703 | 0.0532144336548315 | 0.948487531855783 | 0.853006848093288 | 1.05465577456594 |
| DAG (18:1_18:1) levels | PCOS | Weighted mode | 26 | -0.067779973 | 0.042899513028935 | 0.126684289632199 | -0.151863019 | 0.0163030722442731 | 0.934466058449471 | 0.859105954020892 | 1.01643669247909 |
| DAG (18:1_18:2) levels | PCOS | MR Egger | 26 | 0.0150272181012807 | 0.0532290064846504 | 0.780124179142334 | -0.089301635 | 0.119356070811196 | 1.01514069444194 | 0.914569666101619 | 1.12677105715155 |
| DAG (18:1_18:2) levels | PCOS | Weighted median | 26 | -0.002110713 | 0.0306720889063699 | 0.945136532238702 | -0.062228007 | 0.0580065811306171 | 0.997891512862666 | 0.939668610983515 | 1.05972196985604 |
| DAG (18:1_18:2) levels | PCOS | Inverse variance weighted | 26 | 0.00352131236199048 | 0.0215441493151704 | 0.870167019072482 | -0.03870522 | 0.0457478450197245 | 1.00352751946594 | 0.962034255525783 | 1.04681041921431 |
| DAG (18:1_18:2) levels | PCOS | Simple mode | 26 | 2.9805144014954e-4 | 0.0566262316053236 | 0.995842141065189 | -0.110689363 | 0.111285465386584 | 1.00029809586189 | 0.895216793642348 | 1.11771392995637 |
| DAG (18:1_18:2) levels | PCOS | Weighted mode | 26 | -0.016280535 | 0.0476678842260423 | 0.735550573964441 | -0.109709588 | 0.077148518347651407 | 0.983851276879622 | 0.896094334222721 | 1.08020249436939 |
| PC (15:0_18:1) levels | PCOS | MR Egger | 26 | -0.039544331 | 0.0520803397393629 | 0.455069854861659 | -0.141621797 | 0.0625331345601156 | 0.961227340560538 | 0.867949455317621 | 1.06452973105786 |
| PC (15:0_18:1) levels | PCOS | Weighted median | 26 | -0.038789499 | 0.0299048876506588 | 0.194598288632686 | -0.097403079 | 0.0198240810277379 | 0.9619531801654 | 0.907190263479083 | 1.02002188304092 |
| PC (15:0_18:1) levels | PCOS | Inverse variance weighted | 26 | -0.021778334 | 0.021479137957736 | 0.31061634935541 | -0.063877444 | 0.02032077678906 | 0.978457102069699 | 0.938119964711205 | 1.02052864943063 |
| PC (15:0_18:1) levels | PCOS | Simple mode | 26 | -0.068885756 | 0.0553394741340101 | 0.22475375786495 | -0.177351126 | 0.0395796130413262 | 0.933433312898481 | 0.837485670262191 | 1.04037332287233 |
| PC (15:0_18:1) levels | PCOS | Weighted mode | 26 | -0.059909689 | 0.051609331330627 | 0.256675761878863 | -0.161063979 | 0.0412446001424879 | 0.941849588871609 | 0.851237608311868 | 1.04210697388809 |
| PC (17:0_18:2) levels | PCOS | MR Egger | 26 | 0.0407163602137103 | 0.0495438772151373 | 0.419266767037387 | -0.056389639 | 0.137822359555379 | 1.04155663674225 | 0.945170788611953 | 1.14777164149877 |
| PC (17:0_18:2) levels | PCOS | Weighted median | 26 | -6.92E-04 | 0.0281711345575751 | 0.980395136496699 | -0.055907688 | 0.0545231596389031 | 0.999307975465561 | 0.945626424691732 | 1.05603693356456 |
| PC (17:0_18:2) levels | PCOS | Inverse variance weighted | 26 | -0.004819069 | 0.0204564322486812 | 0.813760779848139 | -0.044913676 | 0.0352755385063234 | 0.995192524380386 | 0.956080011009266 | 1.0359051012238 |
| PC (17:0_18:2) levels | PCOS | Simple mode | 26 | -0.012423966 | 0.0505602240508333 | 0.80790042661132 | -0.111522005 | 0.0866740734677292 | 0.987652893163159 | 0.894471708505338 | 1.09054118548204 |
| PC (17:0_18:2) levels | PCOS | Weighted mode | 26 | 0.00179764804631299 | 0.0469874704177654 | 0.96978582743975 | -0.090297794 | 0.0938930900651332 | 1.00179926478419 | 0.913659062593226 | 1.09844230524419 |
| PC (18:0_18:1) levels | PCOS | MR Egger | 26 | -0.041775747 | 0.0496601233122827 | 0.408521211569343 | -0.139109588 | 0.0555580950527273 | 0.959084834455583 | 0.870132666846012 | 1.05713042933656 |
| PC (18:0_18:1) levels | PCOS | Weighted median | 26 | -0.03209266 | 0.0292214250136953 | 0.272091901645353 | -0.089366653 | 0.025181332948754 | 0.96841684434129 | 0.914510204090256 | 1.02550106079668 |
| PC (18:0_18:1) levels | PCOS | Inverse variance weighted | 26 | -0.020866726 | 0.0203995422657136 | 0.306354339354313 | -0.060849829 | 0.0191163769693998 | 0.979349477820499 | 0.940964535022501 | 1.0193002647909 |
| PC (18:0_18:1) levels | PCOS | Simple mode | 26 | -0.020404871 | 0.0523556738150413 | 0.700032549394965 | -0.123021992 | 0.0822122492692618 | 0.979801899216221 | 0.884244215972409 | 1.08568622148349 |
| PC (18:0_18:1) levels | PCOS | Weighted mode | 26 | -0.0303448 | 0.0451778601727384 | 0.507950986325351 | -0.118893406 | 0.0582038059934874 | 0.970110981661888 | 0.887902440893914 | 1.05993099398793 |
| PC (18:0_22:5) levels | PCOS | MR Egger | 26 | -0.058219861 | 0.0527893211070757 | 0.281019368302447 | -0.161686931 | 0.0452472079511805 | 0.943442498026507 | 0.85070749317873 | 1.04628647827778 |
| PC (18:0_22:5) levels | PCOS | Weighted median | 26 | -0.050733783 | 0.0313815019282451 | 0.105947813090892 | -0.112241526 | 0.0107739611533157 | 0.950531684901538 | 0.893828348279509 | 1.01083220927249 |
| PC (18:0_22:5) levels | PCOS | Inverse variance weighted | 26 | -0.025334555 | 0.0215468581615337 | 0.239679281168588 | -0.067566397 | 0.0168972873930439 | 0.974983672182928 | 0.934665659933627 | 1.01704085404273 |
| PC (18:0_22:5) levels | PCOS | Simple mode | 26 | -0.047200774 | 0.0617436586972078 | 0.451746956928108 | -0.168218345 | 0.0738167970756837 | 0.953895860903459 | 0.845169276036404 | 1.07660954941003 |
| PC (18:0_22:5) levels | PCOS | Weighted mode | 26 | -0.047200774 | 0.0530158658921556 | 0.381785371531646 | -0.151111871 | 0.0567103231777812 | 0.953895860903459 | 0.859751511914944 | 1.05834918675755 |
| PC (O-16:0_16:0) levels | PCOS | MR Egger | 26 | 0.0722208028464168 | 0.0513848026014695 | 0.172689449467219 | -0.02849341 | 0.172935015945297 | 1.07489265722145 | 0.971908698757988 | 1.18878885025422 |
| PC (O-16:0_16:0) levels | PCOS | Weighted median | 26 | 0.0378227853026798 | 0.0310374887053522 | 0.222989912611481 | -0.023010693 | 0.0986562631651701 | 1.03854717074721 | 0.977252034391584 | 1.10368685652164 |
| PC (O-16:0_16:0) levels | PCOS | Inverse variance weighted | 26 | -0.003490136 | 0.0212478694562156 | 0.869527913816856 | -0.04513596 | 0.0381556880875205 | 0.996515947398741 | 0.955867513078071 | 1.03889296354703 |
| PC (O-16:0_16:0) levels | PCOS | Simple mode | 26 | 0.0562100586906121 | 0.0590946632684815 | 0.350615703514379 | -0.059615481 | 0.172035598696836 | 1.05781986465595 | 0.942126729274749 | 1.18772011374959 |
| PC (O-16:0_16:0) levels | PCOS | Weighted mode | 26 | 0.0562100586906121 | 0.0475805621720861 | 0.248574005511945 | -0.037047843 | 0.149467960547901 | 1.05781986465595 | 0.963630031133982 | 1.16121626548307 |
| PC (O-17:0_17:1) levels | PCOS | MR Egger | 26 | -0.052611339 | 0.0506498531617675 | 0.309284334113455 | -0.151885051 | 0.0466623734775828 | 0.948748682711648 | 0.859087026331941 | 1.04776819502253 |
| PC (O-17:0_17:1) levels | PCOS | Weighted median | 26 | -0.036689331 | 0.0301396729417646 | 0.223486216696429 | -0.09576309 | 0.0223844278104286 | 0.963975566010042 | 0.908679265664938 | 1.02263683895592 |
| PC (O-17:0_17:1) levels | PCOS | Inverse variance weighted | 26 | -0.026788669 | 0.0208639267914527 | 0.199152242689554 | -0.067681965 | 0.0141046279183979 | 0.973566965062331 | 0.934557648263129 | 1.01420456750016 |
| PC (O-17:0_17:1) levels | PCOS | Simple mode | 26 | -0.046005249 | 0.0655408634542679 | 0.489205355936268 | -0.174465341 | 0.0824548435257332 | 0.955036949336994 | 0.839905963844979 | 1.08594963467512 |
| PC (O-17:0_17:1) levels | PCOS | Weighted mode | 26 | -0.071317649 | 0.0565771203529931 | 0.219113659120462 | -0.182208805 | 0.0395735072746957 | 0.931166061533187 | 0.833427298868079 | 1.040366971 |
| PI (16:0_18:2) levels | PCOS | MR Egger | 26 | 0.0182221410974397 | 0.0501064153620682 | 0.719289327004034 | -0.079986433 | 0.116430715207093 | 1.01838917735408 | 0.923128870379789 | 1.12347966771446 |
| PI (16:0_18:2) levels | PCOS | Weighted median | 26 | 0.0295510348141415 | 0.0289425634933232 | 0.30724334860033 | -0.02717639 | 0.0862784592610549 | 1.02999199958085 | 0.973189565833741 | 1.09010983722548 |
| PI (16:0_18:2) levels | PCOS | Inverse variance weighted | 26 | 0.0278561575747941 | 0.0206740860271596 | 0.177853090059906 | -0.012665051 | 0.068377366188027 | 1.02824776813068 | 0.987414813203352 | 1.07076930437743 |
| PI (16:0_18:2) levels | PCOS | Simple mode | 26 | 0.0416793241613437 | 0.0522993806907669 | 0.43299133957428 | -0.060827462 | 0.144186110315247 | 1.04256010130541 | 0.940985581547815 | 1.15509906437255 |
| PI (16:0_18:2) levels | PCOS | Weighted mode | 26 | 0.0344383273071567 | 0.0487858216928679 | 0.486771681825809 | -0.061181883 | 0.130058537825178 | 1.03503819281513 | 0.940652135385283 | 1.13889504981267 |
| PI (18:0_18:1) levels | PCOS | MR Egger | 26 | 0.0478956479927011 | 0.0494596459420859 | 0.342513745457644 | -0.049045258 | 0.144836554039189 | 1.04906117797278 | 0.952138036808879 | 1.1558506357104401 |
| PI (18:0_18:1) levels | PCOS | Weighted median | 26 | 0.0133168855812728 | 0.0281866474182785 | 0.636602989356461 | -0.041928943 | 0.0685627145210986 | 1.01340595021746 | 0.958937917059423 | 1.07096778807685 |
| PI (18:0_18:1) levels | PCOS | Inverse variance weighted | 26 | 0.00655188695325245 | 0.020408295924434 | 0.748179795065713 | -0.033448373 | 0.0465521469651431 | 1.00657339751718 | 0.967104838607386 | 1.04765270955344 |
| PI (18:0_18:1) levels | PCOS | Simple mode | 26 | -0.01958975 | 0.0581780039469099 | 0.739137613143517 | -0.133618638 | 0.0944391376471365 | 0.980600882222876 | 0.874923663779833 | 1.0990422707989 |
| PI (18:0_18:1) levels | PCOS | Weighted mode | 26 | 0.0242741622083616 | 0.0479809949833016 | 0.617350528768965 | -0.069768588 | 0.118316912375633 | 1.02457117808504 | 0.932609612030398 | 1.12560077166389 |
| PI (18:0_18:2) levels | PCOS | MR Egger | 26 | 0.00462715756827308 | 0.0492736480369019 | 0.925962352342851 | -0.091949193 | 0.101203507720601 | 1.00463787939267 | 0.91215149242808 | 1.10650180051114 |
| PI (18:0_18:2) levels | PCOS | Weighted median | 26 | 0.0116640635584901 | 0.0287201730135125 | 0.684648626735889 | -0.044627476 | 0.0679556026649746 | 1.01173235400426 | 0.956353680613397 | 1.07031778816647 |
| PI (18:0_18:2) levels | PCOS | Inverse variance weighted | 26 | 0.0182417554323333 | 0.0203311836524841 | 0.369596002670879 | -0.021607365 | 0.0580908753912022 | 1.01840915257635 | 0.978624402282967 | 1.05981130210096 |
| PI (18:0_18:2) levels | PCOS | Simple mode | 26 | 0.0318412372720156 | 0.0574593195321428 | 0.584397796957039 | -0.080779029 | 0.144461503555016 | 1.03235359302121 | 0.922397492012848 | 1.15541721465235 |
| PI (18:0_18:2) levels | PCOS | Weighted mode | 26 | 0.00505241076664431 | 0.0505763837067432 | 0.921223163095783 | -0.094077301 | 0.104182122831861 | 1.00506519571646 | 0.910212398920801 | 1.1098025568958 |
| PI (18:1_18:1) levels | PCOS | MR Egger | 26 | 0.0681668169694859 | 0.0518904104916459 | 0.201377643454406 | -0.033538388 | 0.169872021533112 | 1.07054387846962 | 0.96701778903248 | 1.18515316752903 |
| PI (18:1_18:1) levels | PCOS | Weighted median | 26 | 0.0279809263301959 | 0.0292018341507187 | 0.337966598609614 | -0.029254669 | 0.0852165212656045 | 1.02837606932878 | 0.971169106688985 | 1.08895282261773 |
| PI (18:1_18:1) levels | PCOS | Inverse variance weighted | 26 | 0.0297867550087823 | 0.0212675021599012 | 0.161340875181428 | -0.011897549 | 0.0714710592421887 | 1.03023481811296 | 0.988172946760698 | 1.07408706535787 |
| PI (18:1_18:1) levels | PCOS | Simple mode | 26 | 0.0805322087349999 | 0.0600649124082931 | 0.192057190459837 | -0.03719502 | 0.198259437055254 | 1.08386375596055 | 0.9634882179532 | 1.21927867886182 |
| PI (18:1_18:1) levels | PCOS | Weighted mode | 26 | 0.0640045484573784 | 0.0523561904145778 | 0.232925639585627 | -0.038613585 | 0.166622681669951 | 1.06609724784837 | 0.962122416094074 | 1.18130845187453 |
| TAG (48:1) levels | PCOS | MR Egger | 26 | -0.072386619 | 0.049864575252141 | 0.159542728839903 | -0.170121187 | 0.0253479480245347 | 0.930171203986175 | 0.843562581613645 | 1.02567193896868 |
| TAG (48:1) levels | PCOS | Weighted median | 26 | -0.029579063 | 0.0265143375968395 | 0.26459875548042 | -0.081547165 | 0.0223890387353903 | 0.970854116012016 | 0.921689237683743 | 1.02264155426852 |
| TAG (48:1) levels | PCOS | Inverse variance weighted | 26 | -0.032370722 | 0.0206027768424312 | 0.116140274165174 | -0.072752164 | 0.008010721107024 | 0.968147602407172 | 0.929831247021535 | 1.00804289278208 |
| TAG (48:1) levels | PCOS | Simple mode | 26 | 0.0353198012061365 | 0.0515185090727457 | 0.499289724011744 | -0.065656477 | 0.136296078988718 | 1.03595095419511 | 0.936452502412967 | 1.14602115615309 |
| TAG (48:1) levels | PCOS | Weighted mode | 26 | -0.032277988 | 0.0469086700509937 | 0.497723690062044 | -0.124218981 | 0.0596630056477487 | 0.968237386626546 | 0.883186418702747 | 1.06147877391322 |
| TAG (48:2) levels | PCOS | MR Egger | 26 | -0.081778606 | 0.0525391929774493 | 0.132672878253261 | -0.184755424 | 0.0211982120121018 | 0.921475945154118 | 0.831307576490751 | 1.0214244901774 |
| TAG (48:2) levels | PCOS | Weighted median | 26 | -0.022703712 | 0.0295308894273273 | 0.442004721760366 | -0.080584256 | 0.0351768310524613 | 0.977552077599524 | 0.922577168105939 | 1.03580285471515 |
| TAG (48:2) levels | PCOS | Inverse variance weighted | 26 | -0.038730721 | 0.0215962902053727 | 0.0729094766746021 | -0.08105945 | 0.00359800805207304 | 0.962009723527607 | 0.922138869071482 | 1.00360448865313 |
| TAG (48:2) levels | PCOS | Simple mode | 26 | 0.0335003514540741 | 0.0643353708001686 | 0.607147426888256 | -0.092596975 | 0.159597678222405 | 1.03406780715356 | 0.911560807782269 | 1.17303883697331 |
| TAG (48:2) levels | PCOS | Weighted mode | 26 | 0.0116817594478634 | 0.0517026297012338 | 0.823084078765325 | -0.089655395 | 0.113018913662282 | 1.01175025766648 | 0.914246185012844 | 1.11965310948911 |
| TAG (48:3) levels | PCOS | MR Egger | 26 | -0.043632081 | 0.0554919636057032 | 0.439399895083059 | -0.15239633 | 0.0651321672372174 | 0.957306103381211 | 0.85864790528735 | 1.06730007716519 |
| TAG (48:3) levels | PCOS | Weighted median | 26 | -0.019141271 | 0.0316310408325677 | 0.545084664411916 | -0.081138111 | 0.0428555694242829 | 0.981040760228613 | 0.922066335479057 | 1.04378712918729 |
| TAG (48:3) levels | PCOS | Inverse variance weighted | 26 | -0.034163432 | 0.0224236103261933 | 0.127621828909912 | -0.078113708 | 0.00978684459871202 | 0.966413549178532 | 0.924859256778982 | 1.00983489237978 |
| TAG (48:3) levels | PCOS | Simple mode | 26 | -0.016101388 | 0.0645314490261193 | 0.805003287219884 | -0.142583028 | 0.110380252289904 | 0.984027546608106 | 0.867115556526186 | 1.11670261846389 |
| TAG (48:3) levels | PCOS | Weighted mode | 26 | -0.014637158 | 0.0522033014229199 | 0.78148733564289 | -0.116955629 | 0.0876813124973566 | 0.985469444157086 | 0.889624665752126 | 1.09164017450688 |
| TAG (49:1) levels | PCOS | MR Egger | 26 | -0.051696931 | 0.0547055263058105 | 0.354074411783626 | -0.158919762 | 0.0555259009879652 | 0.94961662300294 | 0.853064804325319 | 1.05709639655889 |
| TAG (49:1) levels | PCOS | Weighted median | 26 | -0.013403732 | 0.0320894020451304 | 0.676166733578769 | -0.07629896 | 0.0494914962397646 | 0.986685698232816 | 0.926539167206688 | 1.05073665696423 |
| TAG (49:1) levels | PCOS | Inverse variance weighted | 26 | -0.029727872 | 0.0225565330696773 | 0.18752796389408 | -0.073938677 | 0.0144829326121206 | 0.970709654687979 | 0.928728644502227 | 1.01458831843126 |
| TAG (49:1) levels | PCOS | Simple mode | 26 | -0.035795802 | 0.0574582629131519 | 0.538934643457253 | -0.148413997 | 0.0768223932424899 | 0.964837291149437 | 0.862074144620047 | 1.07985027065494 |
| TAG (49:1) levels | PCOS | Weighted mode | 26 | 0.0132689373130859 | 0.0539727693120261 | 0.807809361787208 | -0.092517691 | 0.119055565164657 | 1.01335736032209 | 0.911633083541662 | 1.12643250695719 |
| TAG (50:1) levels | PCOS | MR Egger | 26 | -0.03618785 | 0.0494960693992472 | 0.471780796829912 | -0.133200146 | 0.0608244464802226 | 0.964459103264289 | 0.875289889187054 | 1.06271233491944 |
| TAG (50:1) levels | PCOS | Weighted median | 26 | -0.014549946 | 0.0285812174619077 | 0.610700558896843 | -0.070569133 | 0.041469239822172 | 0.985555392556077 | 0.931863315138528 | 1.04234109876079 |
| TAG (50:1) levels | PCOS | Inverse variance weighted | 26 | -0.017034509 | 0.0204258707612654 | 0.404299391809698 | -0.057069216 | 0.0230001977115305 | 0.98310975793401 | 0.944528690915283 | 1.02326674185883 |
| TAG (50:1) levels | PCOS | Simple mode | 26 | -0.019645432 | 0.0465180002522294 | 0.676402271642335 | -0.110820712 | 0.0715298488193267 | 0.980546282330408 | 0.895099214940207 | 1.07415021233843 |
| TAG (50:1) levels | PCOS | Weighted mode | 26 | -0.012505161 | 0.0425883070750726 | 0.771465287813783 | -0.095978243 | 0.0709679206849502 | 0.987572703438078 | 0.908483781690504 | 1.07354678667038 |
| TAG (50:2) levels | PCOS | MR Egger | 26 | -0.079559431 | 0.0493656904067229 | 0.120116163135221 | -0.176316184 | 0.0171973225991599 | 0.923523132805569 | 0.838352867835206 | 1.01734604788716 |
| TAG (50:2) levels | PCOS | Weighted median | 26 | -0.010702315 | 0.0285782631775311 | 0.708038718193184 | -0.066715711 | 0.0453110806763935 | 0.989354750862311 | 0.935461104859449 | 1.04635330958083 |
| TAG (50:2) levels | PCOS | Inverse variance weighted | 26 | -0.024274407 | 0.0203741296036575 | 0.233483710510099 | -0.064207701 | 0.0156588870976302 | 0.976017846951233 | 0.937810195233654 | 1.01578212991167 |
| TAG (50:2) levels | PCOS | Simple mode | 26 | 0.0490330711539704 | 0.0541106631263056 | 0.373500984239144 | -0.057023829 | 0.155089970881529 | 1.05025508331327 | 0.944571561305399 | 1.16776302104731 |
| TAG (50:2) levels | PCOS | Weighted mode | 26 | 0.0162535255284536 | 0.0490753078330855 | 0.743256918839938 | -0.079934078 | 0.112441128881301 | 1.01638633262673 | 0.92317720223038 | 1.11900637781632 |
| TAG (50:3) levels | PCOS | MR Egger | 26 | -0.073969141 | 0.0510767786431592 | 0.160501669730604 | -0.174079627 | 0.0261413451131532 | 0.928700352137786 | 0.84022998986004 | 1.02648602700377 |
| TAG (50:3) levels | PCOS | Weighted median | 26 | -0.019455079 | 0.0303040713119509 | 0.520876073578517 | -0.078851059 | 0.0399409008995317 | 0.980732949829646 | 0.924177562454806 | 1.04074926502946 |
| TAG (50:3) levels | PCOS | Inverse variance weighted | 26 | -0.028099326 | 0.0210609773476073 | 0.182141897197499 | -0.069378842 | 0.0131801895959844 | 0.972291788145612 | 0.932973164066719 | 1.01326743116031 |
| TAG (50:3) levels | PCOS | Simple mode | 26 | 0.03237624054116 | 0.0574401153022518 | 0.578012435484565 | -0.080206385 | 0.144958866533573 | 1.03290605333925 | 0.922925848261624 | 1.15599201933114 |
| TAG (50:3) levels | PCOS | Weighted mode | 26 | 0.00720678578744405 | 0.0475431988072991 | 0.880731705972209 | -0.085977884 | 0.10039145544975 | 1.00723281716475 | 0.917614525073404 | 1.10560362794223 |
| TAG (50:4) levels | PCOS | MR Egger | 26 | -0.05967312 | 0.0546878011849167 | 0.286036479648351 | -0.16686121 | 0.0475149704774441 | 0.942072428040519 | 0.846317063389954 | 1.0486618999731 |
| TAG (50:4) levels | PCOS | Weighted median | 26 | -0.057040121 | 0.0315640611717999 | 0.0707431997900721 | -0.118905681 | 0.00482543852919089 | 0.944556171720951 | 0.887891541620398 | 1.00483709970691 |
| TAG (50:4) levels | PCOS | Inverse variance weighted | 26 | -0.029830313 | 0.0222752564039625 | 0.180515947858022 | -0.073489816 | 0.0138291892810701 | 0.970610219249157 | 0.929145608327168 | 1.01392525484463 |
| TAG (50:4) levels | PCOS | Simple mode | 26 | 0.00414368229453832 | 0.0604721100384203 | 0.945915068535015 | -0.114381653 | 0.122669017969842 | 1.00415227921622 | 0.891917487591601 | 1.13051018046282 |
| TAG (50:4) levels | PCOS | Weighted mode | 26 | -0.049891934 | 0.0469444975039643 | 0.298038047746983 | -0.141903149 | 0.0421192812736857 | 0.951332225772096 | 0.867705290592005 | 1.04301888395197 |
| TAG (51:4) levels | PCOS | MR Egger | 26 | -0.036967841 | 0.0621502611458281 | 0.55753473017529 | -0.158782353 | 0.0848466703963796 | 0.963707126275081 | 0.853182031020533 | 1.0885501469393 |
| TAG (51:4) levels | PCOS | Weighted median | 26 | -0.045994961 | 0.0348953674836083 | 0.187476153490686 | -0.114389881 | 0.0223999597179294 | 0.955046775089113 | 0.891910149426805 | 1.02265272258006 |
| TAG (51:4) levels | PCOS | Inverse variance weighted | 26 | -0.033487173 | 0.0251753196747698 | 0.183465954770834 | -0.0828308 | 0.0158564534992231 | 0.967067315663065 | 0.920506884153563 | 1.01598283415743 |
| TAG (51:4) levels | PCOS | Simple mode | 26 | -0.073128149 | 0.0696022814293159 | 0.303466623782018 | -0.209548621 | 0.0632923226457104 | 0.92948171028286 | 0.81095020962349 | 1.06533821620376 |
| TAG (51:4) levels | PCOS | Weighted mode | 26 | -0.064487589 | 0.0626489885324887 | 0.313172867034291 | -0.187279606 | 0.0583044288050359 | 0.937547750358757 | 0.829211851158847 | 1.06003765259064 |
| TAG (54:6) levels | PCOS | MR Egger | 26 | 0.0182449478892187 | 0.0497078797764673 | 0.716803200446556 | -0.079182496 | 0.115672392251095 | 1.01841240380885 | 0.923871305804903 | 1.12262803024077 |
| TAG (54:6) levels | PCOS | Weighted median | 26 | 0.0137598886399043 | 0.0278961048553345 | 0.621832535727043 | -0.040916477 | 0.0684362541563599 | 1.01385499160905 | 0.95990930122274 | 1.07083236166296 |
| TAG (54:6) levels | PCOS | Inverse variance weighted | 26 | 0.00688709719812234 | 0.0205215902761934 | 0.737170631260957 | -0.03333522 | 0.0471094141394613 | 1.00691086779082 | 0.967214275917716 | 1.04823669472133 |
| TAG (54:6) levels | PCOS | Simple mode | 26 | 0.011236078314329 | 0.0535183074558725 | 0.835409634021723 | -0.093659804 | 0.116131960927839 | 1.01129944013268 | 0.910592489203914 | 1.12314407348868 |
| TAG (54:6) levels | PCOS | Weighted mode | 26 | 0.016539179489156 | 0.0470664201350958 | 0.728232044335321 | -0.075711004 | 0.108789362953944 | 1.01667670887984 | 0.92708409146537 | 1.1149274805751 |

| **Table S11. Results of MR Analysis between lifestyle and lipidomics** | | | | | | | | | |
| --- | --- | --- | --- | --- | --- | --- | --- | --- | --- |
| **Expourse** | **Outcome** | **Heterogeneity test** | | | | **Pleiotropy test** | | | |
| **IVW Q** | **IVW Q_pval** | **MR Egger Q** | **MR Egger Q_pval** | **MR Egger_intercept** | **MR Egger_pval** | **RSSobs** | **Global pval** |
| Overall physical activity time | DAG (16:1_18:1) levels | 49.7488549176336 | 0.326418987193254 | 49.5421201396885 | 0.296900780018629 | -0.005365834 | 0.666840189623959 | 51.9144699620423 | 0.35 |
| Overall physical activity time | DAG (18:1_18:1) levels | 41.7696070063443 | 0.649963788448865 | 41.5633252963171 | 0.618335056479031 | -0.005076326 | 0.651880677275644 | 43.5180080364495 | 0.693 |
| Overall physical activity time | DAG (18:1_18:2) levels | 46.8731607529122 | 0.436467760596275 | 46.2466670359772 | 0.420582964944684 | -0.009052867 | 0.439024550120153 | 49.0381992975518 | 0.433 |
| Overall physical activity time | TAG (48:1) levels | 49.0648978190745 | 0.351266176915391 | 48.6787178746528 | 0.327234355323093 | -0.006897414 | 0.553174384182609 | 51.2343665474939 | 0.357 |
| Overall physical activity time | TAG (49:1) levels | 52.9336718827142 | 0.224164769899433 | 52.9269458132742 | 0.194790209308201 | -0.001000248 | 0.940054984647374 | 55.2795706637301 | 0.242 |
| Overall physical activity time | TAG (50:1) levels | 49.9582433806002 | 0.319001699596358 | 49.9274013801435 | 0.283901219222968 | -0.001932257 | 0.868331157230103 | 52.1785266173996 | 0.334 |
| Overall physical activity time | TAG (50:2) levels | 56.5923521191633 | 0.136160788857657 | 56.4989536902545 | 0.116843986805508 | -0.003352319 | 0.786297437860195 | 59.03897361 | 0.152 |
| Overall physical activity time | TAG (50:3) levels | 58.9769315268494 | 0.0948716543823566 | 58.9490033495369 | 0.0793008436799937 | -0.001834109 | 0.884563834757209 | 61.5330696770416 | 0.1 |
| Overall physical activity time | TAG (51:4) levels | 47.5526571863427 | 0.409250670090179 | 47.5273967433471 | 0.370093620483904 | 0.00203020288955089 | 0.877787466118308 | 49.6842557558223 | 0.385 |
| Overall physical activity time | TAG (54:6) levels | 49.2353360043303 | 0.344987979046187 | 49.0240778965106 | 0.314905955434625 | 0.00508526632459577 | 0.66178422489331 | 51.4345517956709 | 0.334 |
| Leisure screen time | DAG (18:1_18:2) levels | 90.5221336263466 | 0.610846539153202 | 89.00251271 | 0.626380297181026 | 0.0121777539109735 | 0.220751053661139 | 92.4008403697442 | 0.615 |
| Leisure screen time | PC (18:0_22:5) levels | 99.6165509800142 | 0.435489014456465 | 98.1734785106144 | 0.447589864382386 | -0.011517214 | 0.235359214282079 | 101.651031987095 | 0.433 |
| Leisure screen time | PI (18:0_18:1) levels | 115.301212548779 | 0.111852757464406 | 114.086735928916 | 0.11341831543926 | -0.010305647 | 0.312080254861639 | 117.737600039683 | 0.116 |
| Leisure screen time | TAG (50:1) levels | 90.2375059587308 | 0.590700411614089 | 89.0706420186935 | 0.596072389164782 | 0.0101532369213923 | 0.282839955059598 | 92.1403787444335 | 0.577 |
| Leisure screen time | TAG (50:2) levels | 111.07948012923 | 0.172895894674808 | 110.232802864963 | 0.16919131639691 | 0.008589492199617 | 0.390180782218316 | 113.270997664528 | 0.174 |
| Leisure screen time | TAG (50:3) levels | 114.797953218128 | 0.1181219395069 | 113.970963904515 | 0.114859244571483 | 0.00849379557799373 | 0.403557314027398 | 117.086472357788 | 0.116 |
| Leisure screen time | TAG (50:4) levels | 82.7319470846816 | 0.790455176935642 | 82.4817952712817 | 0.77427704773466 | 0.00474713350217511 | 0.618149643560513 | 84.5086792204042 | 0.794 |

| **Table S12. Results of inverse MR Analysis between lifestyle and lipidomics** | | | | | | | | | | |
| --- | --- | --- | --- | --- | --- | --- | --- | --- | --- | --- |
| **id.exposure** | **outcome** | **exposure** | **method** | **nsnp** | **b** | **se** | **pval** | **or** | **or_lci95** | **or_uci95** |
| GCST90277260 | Overall physical activity time | DAG (16:1_18:1) levels | MR Egger | 9 | 0.0616292838207102 | 0.0384035395507159 | 0.152576831329231 | 1.06356798977409 | 0.986450971991554 | 1.14671372525321 |
| GCST90277260 | Overall physical activity time | DAG (16:1_18:1) levels | Weighted median | 9 | 0.0240199964028743 | 0.0196673901185643 | 0.221968357273093 | 1.02431080021726 | 0.985576935232436 | 1.06456693326969 |
| GCST90277260 | Overall physical activity time | DAG (16:1_18:1) levels | Inverse variance weighted | 9 | 0.0133925886046976 | 0.0151591496698981 | 0.376984712874866 | 1.01348267101581 | 0.983813094339801 | 1.04404701498572 |
| GCST90277260 | Overall physical activity time | DAG (16:1_18:1) levels | Simple mode | 9 | 0.0305160768264561 | 0.0312321515825865 | 0.357150286395974 | 1.03098646490602 | 0.969767487064617 | 1.09607004255917 |
| GCST90277260 | Overall physical activity time | DAG (16:1_18:1) levels | Weighted mode | 9 | 0.029625665895553 | 0.027431371346921 | 0.311626211332172 | 1.03006887186612 | 0.976149213134503 | 1.08696689656741 |
| GCST90277261 | Overall physical activity time | DAG (18:1_18:1) levels | MR Egger | 19 | -0.026625155 | 0.0296453788220521 | 0.381665081294869 | 0.973726169854803 | 0.918760226954971 | 1.03198051683464 |
| GCST90277261 | Overall physical activity time | DAG (18:1_18:1) levels | Weighted median | 19 | -0.020235057 | 0.0158870122359788 | 0.202774903746222 | 0.97996829798754 | 0.94992371195662 | 1.01096314680105 |
| GCST90277261 | Overall physical activity time | DAG (18:1_18:1) levels | Inverse variance weighted | 19 | -0.01516354 | 0.0132459740789801 | 0.252306130859492 | 0.984950847692519 | 0.959708535886961 | 1.01085708430594 |
| GCST90277261 | Overall physical activity time | DAG (18:1_18:1) levels | Simple mode | 19 | -0.036195591 | 0.0264593636422759 | 0.188158314283371 | 0.964451637052067 | 0.915709647143256 | 1.01578809736717 |
| GCST90277261 | Overall physical activity time | DAG (18:1_18:1) levels | Weighted mode | 19 | -0.028536065 | 0.0214055092752277 | 0.199121275213595 | 0.971867242876751 | 0.931936254186091 | 1.01350916817992 |
| GCST90277262 | Overall physical activity time | DAG (18:1_18:2) levels | MR Egger | 23 | -3.32E-04 | 0.0253407450369866 | 0.989664609040478 | 0.999667864460143 | 0.95122937600554 | 1.05057293691956 |
| GCST90277262 | Overall physical activity time | DAG (18:1_18:2) levels | Weighted median | 23 | -0.016816518 | 0.0143303423798512 | 0.240599232191352 | 0.983324090141093 | 0.956089272244496 | 1.01133470934348 |
| GCST90277262 | Overall physical activity time | DAG (18:1_18:2) levels | Inverse variance weighted | 23 | -0.016838171 | 0.0106894721968408 | 0.115207826299522 | 0.983302799055204 | 0.962915578522418 | 1.00412166569521 |
| GCST90277262 | Overall physical activity time | DAG (18:1_18:2) levels | Simple mode | 23 | -0.049549991 | 0.0255084488159704 | 0.0649864105399141 | 0.951657582357464 | 0.905247808725047 | 1.00044666811619 |
| GCST90277262 | Overall physical activity time | DAG (18:1_18:2) levels | Weighted mode | 23 | -0.039107375 | 0.0253669762968778 | 0.137417283092357 | 0.961647447063613 | 0.915004177473657 | 1.01066840481238 |
| GCST90277262 | Leisure screen time | DAG (18:1_18:2) levels | MR Egger | 19 | 3.772918719334e-4 | 0.0184774443288079 | 0.98394683610124 | 1.00037736305546 | 0.9647960964239 | 1.03727085155422 |
| GCST90277262 | Leisure screen time | DAG (18:1_18:2) levels | Weighted median | 19 | -0.009995023 | 0.0115773926644698 | 0.387960217189567 | 0.990054761510609 | 0.967841724958624 | 1.01277761178537 |
| GCST90277262 | Leisure screen time | DAG (18:1_18:2) levels | Inverse variance weighted | 19 | -8.31E-05 | 0.00834843656088683 | 0.992056649054573 | 0.999916889103562 | 0.983688447941381 | 1.01641305965009 |
| GCST90277262 | Leisure screen time | DAG (18:1_18:2) levels | Simple mode | 19 | -5.23E-04 | 0.0194087855168349 | 0.978791043587597 | 0.999476943882682 | 0.962169726917063 | 1.03823071273908 |
| GCST90277262 | Leisure screen time | DAG (18:1_18:2) levels | Weighted mode | 19 | -0.009326647 | 0.016322342355768 | 0.574792240100183 | 0.990716710991718 | 0.959523532251075 | 1.02292394969779 |
| GCST90277306 | Leisure screen time | PC (18:0_22:5) levels | MR Egger | 18 | -0.002218246 | 0.0199703476787998 | 0.912936748866881 | 0.997784212379012 | 0.959483531257644 | 1.03761378078877 |
| GCST90277306 | Leisure screen time | PC (18:0_22:5) levels | Weighted median | 18 | 0.0100460398888618 | 0.0113030872953664 | 0.374117428692069 | 1.01009667075211 | 0.987964995804025 | 1.03272412342318 |
| GCST90277306 | Leisure screen time | PC (18:0_22:5) levels | Inverse variance weighted | 18 | 0.0155430155917399 | 0.0100105943256453 | 0.120505190146185 | 1.01566443652541 | 0.995930553443779 | 1.03578933697279 |
| GCST90277306 | Leisure screen time | PC (18:0_22:5) levels | Simple mode | 18 | 0.0323216788932032 | 0.0188191935972029 | 0.104050768924092 | 1.03284969782023 | 0.995446458393312 | 1.0716583391227 |
| GCST90277306 | Leisure screen time | PC (18:0_22:5) levels | Weighted mode | 18 | 0.0122570803215053 | 0.0118412278593438 | 0.315114465497264 | 1.01233250618243 | 0.989108025543999 | 1.03610230289048 |
| GCST90277361 | Leisure screen time | PI (18:0_18:1) levels | MR Egger | 16 | -0.012693599 | 0.0316376659009342 | 0.694316639055615 | 0.987386624968259 | 0.928018673471924 | 1.05055251045625 |
| GCST90277361 | Leisure screen time | PI (18:0_18:1) levels | Weighted median | 16 | -0.011971202 | 0.0108527841573431 | 0.270003898552722 | 0.98810016736625 | 0.967303805797009 | 1.0093436362992 |
| GCST90277361 | Leisure screen time | PI (18:0_18:1) levels | Inverse variance weighted | 16 | -0.007837749 | 0.0104641528934753 | 0.453851532971929 | 0.992192886066668 | 0.972050531560982 | 1.01275262056636 |
| GCST90277361 | Leisure screen time | PI (18:0_18:1) levels | Simple mode | 16 | -0.016599614 | 0.0159675428638015 | 0.315000768856381 | 0.98353740070897 | 0.95323292032395 | 1.01480529886086 |
| GCST90277361 | Leisure screen time | PI (18:0_18:1) levels | Weighted mode | 16 | -0.013523241 | 0.0113853312122291 | 0.253389312388019 | 0.986567786760964 | 0.964796104491336 | 1.00883077091981 |
| GCST90277382 | Overall physical activity time | TAG (48:1) levels | MR Egger | 10 | -0.053996883 | 0.038546645301267 | 0.198843142561332 | 0.947435059428731 | 0.878492149169214 | 1.02178851875183 |
| GCST90277382 | Overall physical activity time | TAG (48:1) levels | Weighted median | 10 | -0.013341479 | 0.0224170625161233 | 0.551744263204916 | 0.986747123668002 | 0.944330638105541 | 1.03106882989669 |
| GCST90277382 | Overall physical activity time | TAG (48:1) levels | Inverse variance weighted | 10 | -0.015466863 | 0.016605289209759 | 0.351624999729359 | 0.984652134673506 | 0.953121177385968 | 1.01722619255629 |
| GCST90277382 | Overall physical activity time | TAG (48:1) levels | Simple mode | 10 | -0.0062506 | 0.0335745425119888 | 0.856439406568711 | 0.993768894341651 | 0.93047813309378 | 1.06136466858968 |
| GCST90277382 | Overall physical activity time | TAG (48:1) levels | Weighted mode | 10 | -0.012914614 | 0.0288764874676709 | 0.665273869947776 | 0.987168422102454 | 0.932848445546171 | 1.0446514632135 |
| GCST90277385 | Overall physical activity time | TAG (49:1) levels | MR Egger | 10 | 0.0451936748636856 | 0.033577296832294 | 0.215210783912976 | 1.04623046883139 | 0.97959326720933 | 1.11740069123734 |
| GCST90277385 | Overall physical activity time | TAG (49:1) levels | Weighted median | 10 | -0.01932908 | 0.0235552557559284 | 0.411882913676347 | 0.980856528380502 | 0.936601498993926 | 1.02720263666041 |
| GCST90277385 | Overall physical activity time | TAG (49:1) levels | Inverse variance weighted | 10 | -0.003353041 | 0.0184095260604727 | 0.855475831748893 | 0.996652573843111 | 0.961331753714622 | 1.03327113570304 |
| GCST90277385 | Overall physical activity time | TAG (49:1) levels | Simple mode | 10 | -0.052662424 | 0.0434947482574679 | 0.256815889031369 | 0.948700217325166 | 0.871175238471458 | 1.03312406345707 |
| GCST90277385 | Overall physical activity time | TAG (49:1) levels | Weighted mode | 10 | -0.050016957 | 0.0500615802314674 | 0.343845053117848 | 0.951213294209422 | 0.862312405410723 | 1.04927950172511 |
| GCST90277387 | Overall physical activity time | TAG (50:1) levels | MR Egger | 13 | -0.030675765 | 0.02760940050759 | 0.290236888967701 | 0.969789961947173 | 0.918705017680399 | 1.02371550409957 |
| GCST90277387 | Overall physical activity time | TAG (50:1) levels | Weighted median | 13 | -0.009286534 | 0.018391031032202 | 0.613594602247338 | 0.99075645252762 | 0.955679230690309 | 1.02712114766383 |
| GCST90277387 | Overall physical activity time | TAG (50:1) levels | Inverse variance weighted | 13 | -0.005544418 | 0.0132813431013206 | 0.676342613971546 | 0.994470924010027 | 0.968917460902612 | 1.02069831395139 |
| GCST90277387 | Overall physical activity time | TAG (50:1) levels | Simple mode | 13 | -0.001750155 | 0.032222224219474 | 0.957577878047231 | 0.998251375585531 | 0.937155819404915 | 1.06332990546991 |
| GCST90277387 | Overall physical activity time | TAG (50:1) levels | Weighted mode | 13 | -0.013502841 | 0.0292011257235695 | 0.652060617539798 | 0.986587913373474 | 0.931706854600764 | 1.0447016741459 |
| GCST90277387 | Leisure screen time | TAG (50:1) levels | MR Egger | 9 | -0.012353226 | 0.0277770831891317 | 0.669942527645252 | 0.987722762239172 | 0.935385711880999 | 1.04298819476676 |
| GCST90277387 | Leisure screen time | TAG (50:1) levels | Weighted median | 9 | -0.022078542 | 0.0174909858834975 | 0.206847642022891 | 0.978163405578215 | 0.945197977087195 | 1.01227856090101 |
| GCST90277387 | Leisure screen time | TAG (50:1) levels | Inverse variance weighted | 9 | -0.018396928 | 0.0138647320824298 | 0.184546176691834 | 0.981771262414532 | 0.955450995886697 | 1.00881658593962 |
| GCST90277387 | Leisure screen time | TAG (50:1) levels | Simple mode | 9 | -0.025435256 | 0.0269660692993023 | 0.373171415797012 | 0.974885495014265 | 0.924697380032593 | 1.02779757887463 |
| GCST90277387 | Leisure screen time | TAG (50:1) levels | Weighted mode | 9 | -0.024786368 | 0.0204357925941131 | 0.259768374031395 | 0.975518291282353 | 0.937216917027985 | 1.01538493313179 |
| GCST90277388 | Overall physical activity time | TAG (50:2) levels | MR Egger | 8 | -0.039234312 | 0.0359748946085197 | 0.317296895270929 | 0.961525386170825 | 0.896062507988281 | 1.03177073028821 |
| GCST90277388 | Overall physical activity time | TAG (50:2) levels | Weighted median | 8 | -0.003969349 | 0.0217159144674883 | 0.854966508824278 | 0.996038518222321 | 0.954533498029102 | 1.03934825947017 |
| GCST90277388 | Overall physical activity time | TAG (50:2) levels | Inverse variance weighted | 8 | 0.0143386955830476 | 0.0161943559797188 | 0.375933847840583 | 1.01444198777988 | 0.982748302343066 | 1.04715779627116 |
| GCST90277388 | Overall physical activity time | TAG (50:2) levels | Simple mode | 8 | -0.016514419 | 0.0317467841158841 | 0.618971724480184 | 0.983621196132581 | 0.92428194722666 | 1.04677004715319 |
| GCST90277388 | Overall physical activity time | TAG (50:2) levels | Weighted mode | 8 | -0.010242897 | 0.0267359021155861 | 0.71300414589925 | 0.989809382373284 | 0.939276608326202 | 1.04306080312173 |
| GCST90277388 | Leisure screen time | TAG (50:2) levels | MR Egger | 9 | -0.025355547 | 0.0227653152520781 | 0.302150436208596 | 0.974963205155624 | 0.932416603327624 | 1.01945122814735 |
| GCST90277388 | Leisure screen time | TAG (50:2) levels | Weighted median | 9 | -0.012475801 | 0.0163236611951329 | 0.444702104552878 | 0.987601699068054 | 0.95650412543912 | 1.01971030763127 |
| GCST90277388 | Leisure screen time | TAG (50:2) levels | Inverse variance weighted | 9 | 4.4585735086693e-4 | 0.0124819612130635 | 0.971505514667808 | 1.00044595676003 | 0.976267368814974 | 1.02522336028951 |
| GCST90277388 | Leisure screen time | TAG (50:2) levels | Simple mode | 9 | -0.02785392 | 0.029008071976993 | 0.365066555326516 | 0.972530423731711 | 0.918778929544819 | 1.02942655155616 |
| GCST90277388 | Leisure screen time | TAG (50:2) levels | Weighted mode | 9 | -0.026235647 | 0.0253449531055201 | 0.330876259607245 | 0.974105517339549 | 0.926897996814062 | 1.02371734772634 |
| GCST90277389 | Overall physical activity time | TAG (50:3) levels | MR Egger | 16 | -0.016522248 | 0.0232174143241072 | 0.488382039898836 | 0.983613495716902 | 0.93985621322513 | 1.02940800448235 |
| GCST90277389 | Overall physical activity time | TAG (50:3) levels | Weighted median | 16 | -0.014205364 | 0.0161544755969734 | 0.37921403303502 | 0.985895056494311 | 0.955167906348373 | 1.01761067971374 |
| GCST90277389 | Overall physical activity time | TAG (50:3) levels | Inverse variance weighted | 16 | -0.006323515 | 0.011893370158331 | 0.594944833868858 | 0.993696436015355 | 0.970800275986841 | 1.01713259809889 |
| GCST90277389 | Overall physical activity time | TAG (50:3) levels | Simple mode | 16 | -0.011067224 | 0.0277002158526493 | 0.695129684568679 | 0.988993792304325 | 0.936730510292985 | 1.04417301504417 |
| GCST90277389 | Overall physical activity time | TAG (50:3) levels | Weighted mode | 16 | -0.018525164 | 0.0204904092220024 | 0.380239100257958 | 0.981645371693136 | 0.943002479905773 | 1.02187179387147 |
| GCST90277389 | Leisure screen time | TAG (50:3) levels | MR Egger | 16 | -0.019510372 | 0.0209837952493013 | 0.368239037277281 | 0.980678723944919 | 0.941163305075217 | 1.02185322612145 |
| GCST90277389 | Leisure screen time | TAG (50:3) levels | Weighted median | 16 | -0.012754875 | 0.0129904390279226 | 0.326165708061524 | 0.987326124052192 | 0.962504887304508 | 1.01278745499764 |
| GCST90277389 | Leisure screen time | TAG (50:3) levels | Inverse variance weighted | 16 | 0.00606064706556411 | 0.010980635068868 | 0.58098975230345 | 1.00607904994599 | 0.984657516093051 | 1.02796661600314 |
| GCST90277389 | Leisure screen time | TAG (50:3) levels | Simple mode | 16 | -0.008539488 | 0.0214841227580601 | 0.696613135196783 | 0.991496869537101 | 0.950612876790485 | 1.03413920251213 |
| GCST90277389 | Leisure screen time | TAG (50:3) levels | Weighted mode | 16 | -0.017679949 | 0.0156101233911885 | 0.275164698574513 | 0.982475424107919 | 0.952870957574351 | 1.01299966307423 |
| GCST90277390 | Leisure screen time | TAG (50:4) levels | MR Egger | 19 | -0.028214119 | 0.0292932022159627 | 0.348967461186303 | 0.972180181988076 | 0.91793490943665 | 1.02963107354792 |
| GCST90277390 | Leisure screen time | TAG (50:4) levels | Weighted median | 19 | 0.00579108620849454 | 0.0143364110217152 | 0.686254977073721 | 1.00580788696412 | 0.97793871022363 | 1.03447127606584 |
| GCST90277390 | Leisure screen time | TAG (50:4) levels | Inverse variance weighted | 19 | -0.002682585 | 0.0104866703588694 | 0.798098323989289 | 0.997321010255743 | 0.977031429009601 | 1.01803193629686 |
| GCST90277390 | Leisure screen time | TAG (50:4) levels | Simple mode | 19 | 0.00814641239169614 | 0.0263861938964329 | 0.761065851215073 | 1.00817968469773 | 0.957365031008532 | 1.06169145907331 |
| GCST90277390 | Leisure screen time | TAG (50:4) levels | Weighted mode | 19 | 0.0164375578456619 | 0.0195093341058008 | 0.410537102151736 | 1.01657339777119 | 0.978435181555664 | 1.05619819538069 |
| GCST90277395 | Overall physical activity time | TAG (51:4) levels | MR Egger | 13 | -0.006685661 | 0.0270210906834967 | 0.809137717017397 | 0.993336638398535 | 0.94209703642032006 | 1.04736310490279 |
| GCST90277395 | Overall physical activity time | TAG (51:4) levels | Weighted median | 13 | 0.00620063906515838 | 0.0145187167485048 | 0.669321786242384 | 1.00621990282285 | 0.977989792848595 | 1.03526488746655 |
| GCST90277395 | Overall physical activity time | TAG (51:4) levels | Inverse variance weighted | 13 | 0.00206207967520305 | 0.0109385315628629 | 0.850472786207217 | 1.00206420722364 | 0.980809093639384 | 1.02377994036822 |
| GCST90277395 | Overall physical activity time | TAG (51:4) levels | Simple mode | 13 | -0.004436971 | 0.023944243235544 | 0.856085500773754 | 0.995572857473896 | 0.949929328618094 | 1.04340953024435 |
| GCST90277395 | Overall physical activity time | TAG (51:4) levels | Weighted mode | 13 | 0.0169753290817414 | 0.0197948830106323 | 0.407935930051823 | 1.01712022872568 | 0.978413749542102 | 1.05735795328627 |
| GCST90277407 | Overall physical activity time | TAG (54:6) levels | MR Egger | 11 | 0.0164834129662678 | 0.0264432394910023 | 0.548523506620615 | 1.01662001393574 | 0.965272015095538 | 1.07069948840526 |
| GCST90277407 | Overall physical activity time | TAG (54:6) levels | Weighted median | 11 | 0.0165902944252234 | 0.0175370430739717 | 0.344141266478653 | 1.01672867757299 | 0.982374862267141 | 1.05228385161816 |
| GCST90277407 | Overall physical activity time | TAG (54:6) levels | Inverse variance weighted | 11 | 0.0126152044946129 | 0.0131929740035062 | 0.338968031585707 | 1.01269511184917 | 0.986844278487026 | 1.03922311951336 |
| GCST90277407 | Overall physical activity time | TAG (54:6) levels | Simple mode | 11 | 0.00878447975247712 | 0.0238880576557192 | 0.720734548530491 | 1.00882317652207 | 0.962678174823218 | 1.05718009206449 |
| GCST90277407 | Overall physical activity time | TAG (54:6) levels | Weighted mode | 11 | 0.0206959486346114 | 0.0211587146383008 | 0.351080039007028 | 1.02091159487816 | 0.979439184283549 | 1.06414007248348 |

**Supplementary Figures**

**Fig. S1. Leave-one-out sensitivity analysis between four lifestyle factors and PCOS**

**
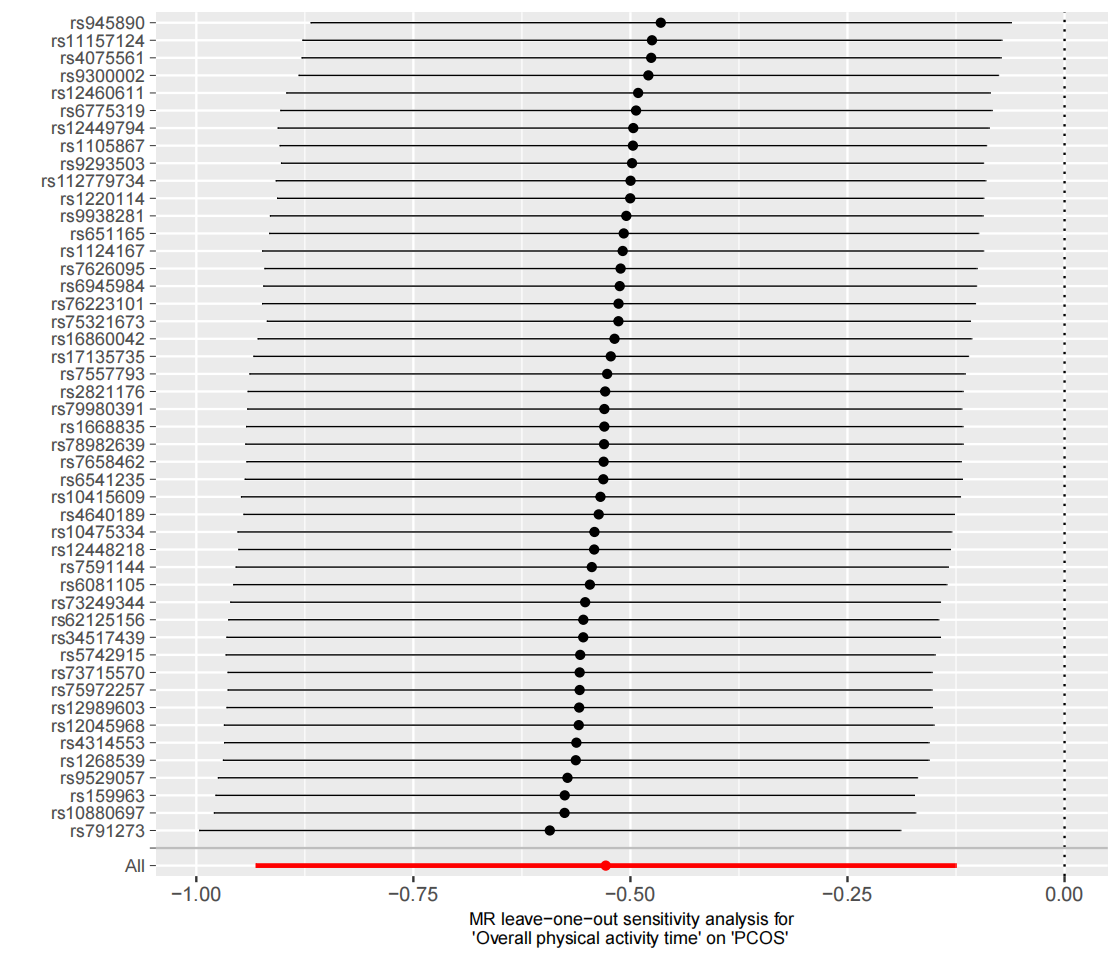
**

**
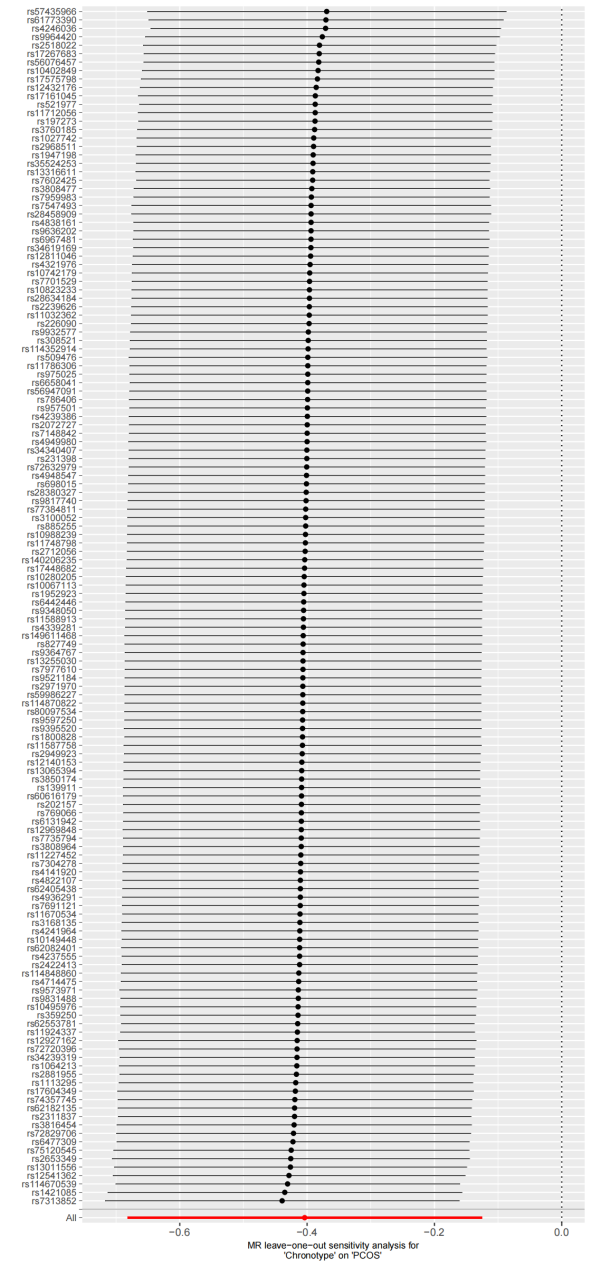

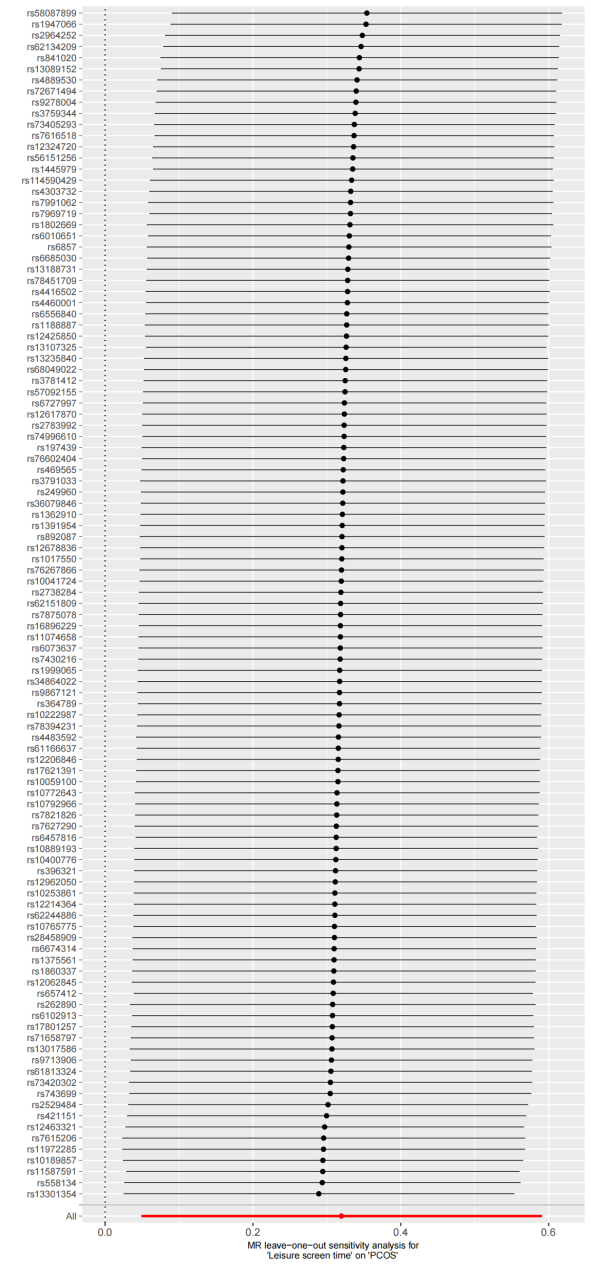

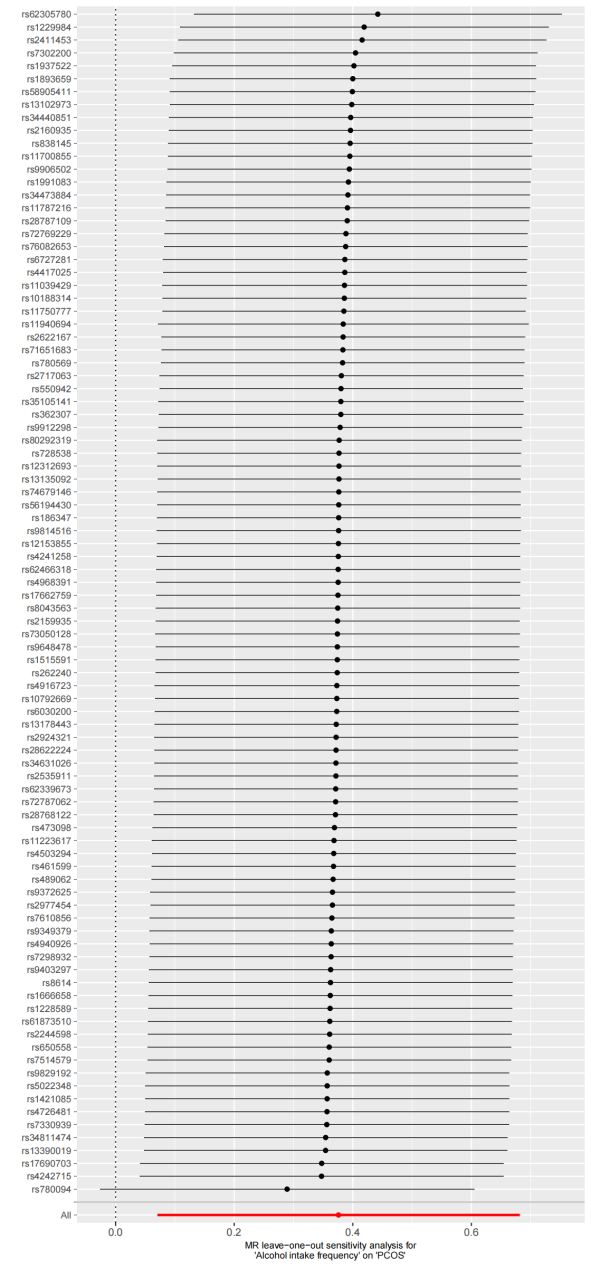
**

**Fig. S2. Leave-one-out sensitivity analysis between 24 lipids and PCOS**

**
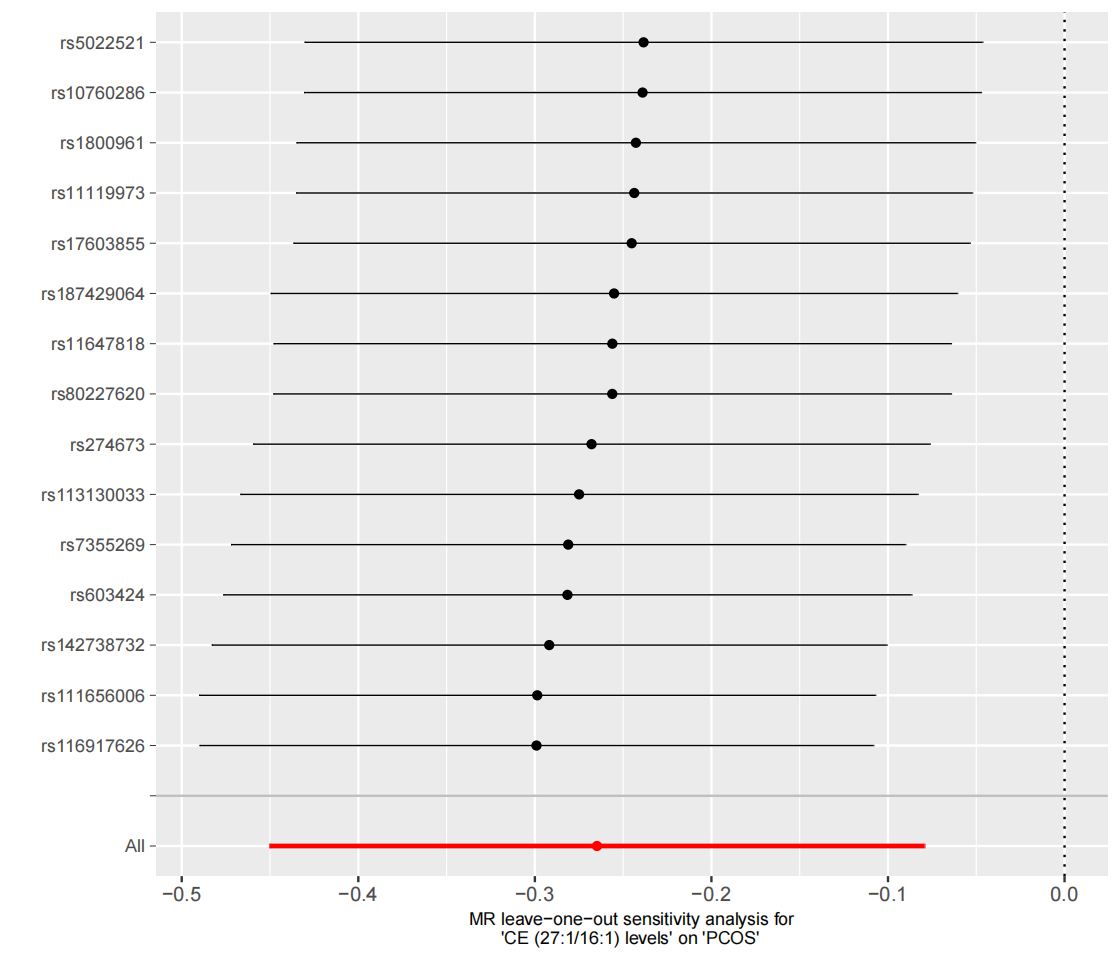

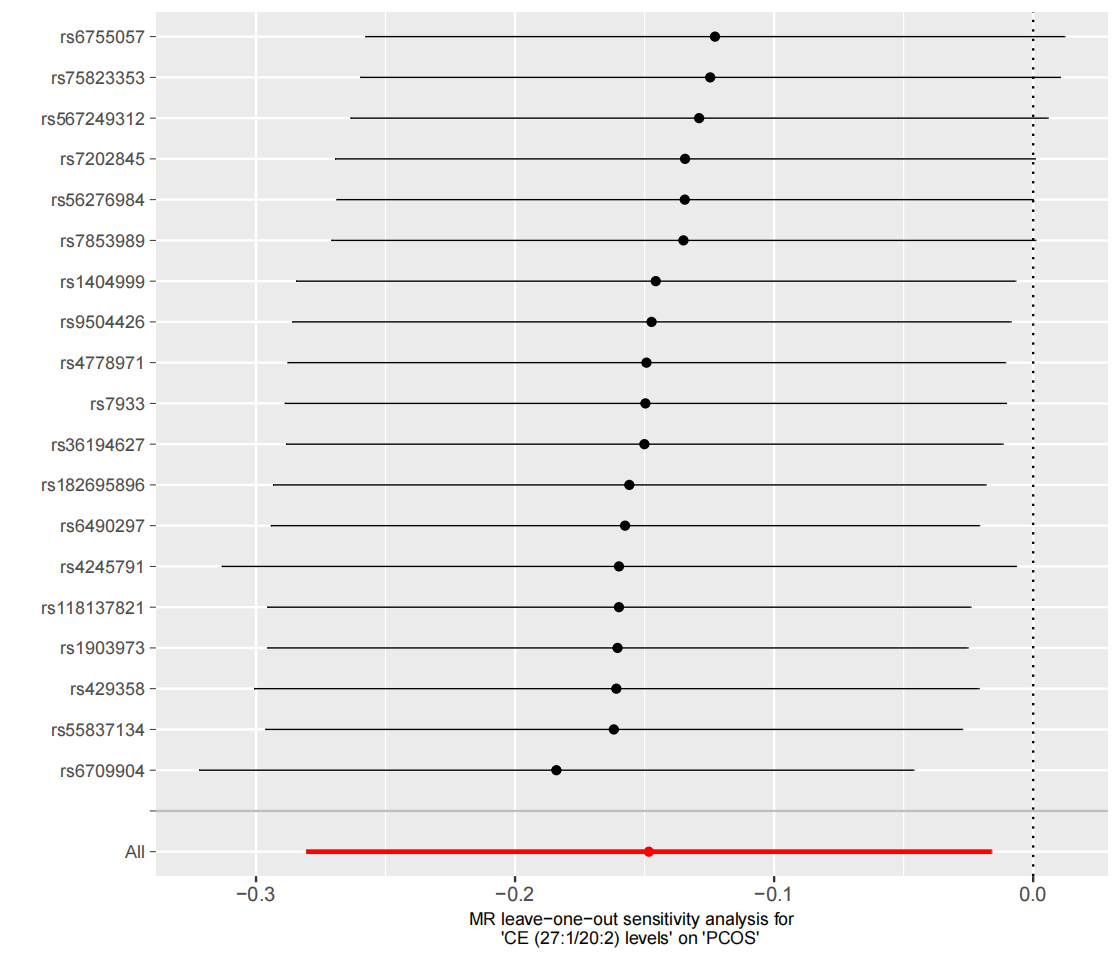
**


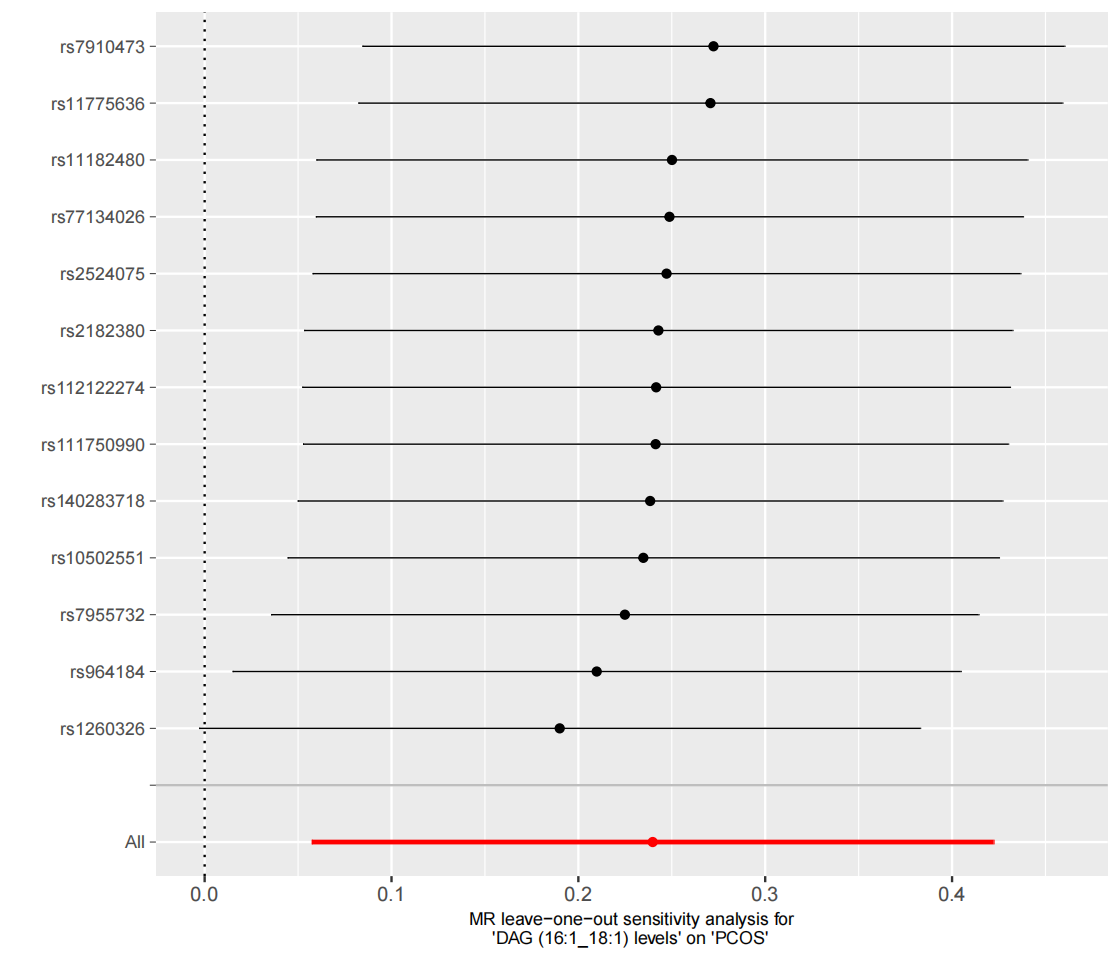

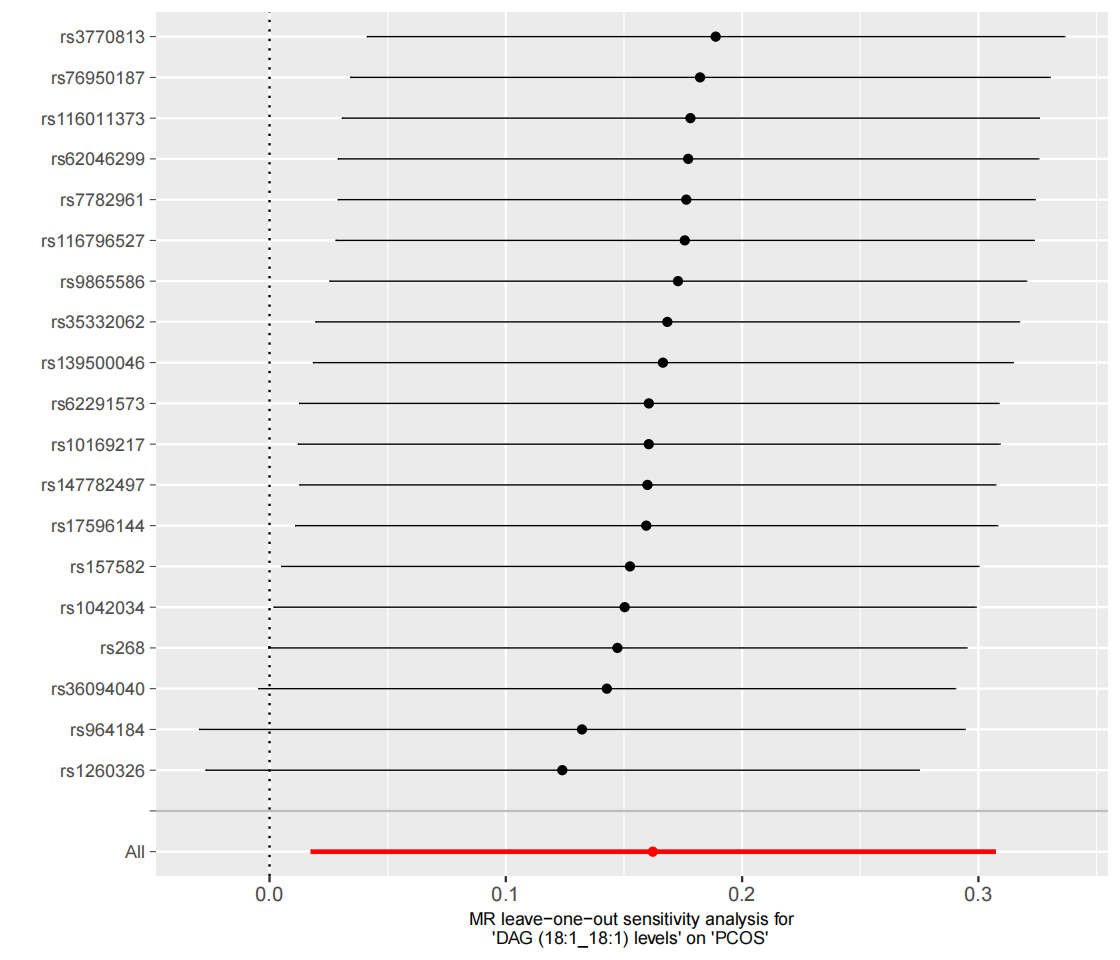


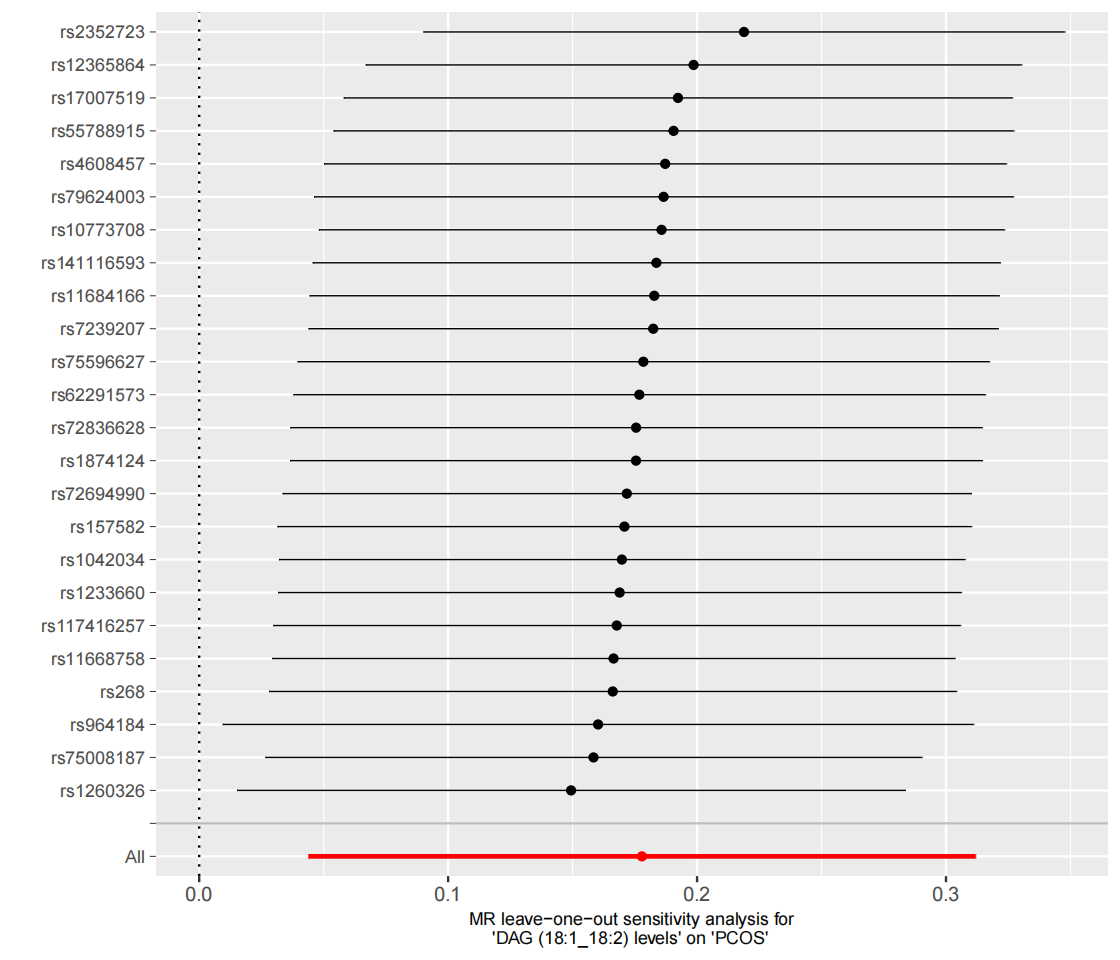

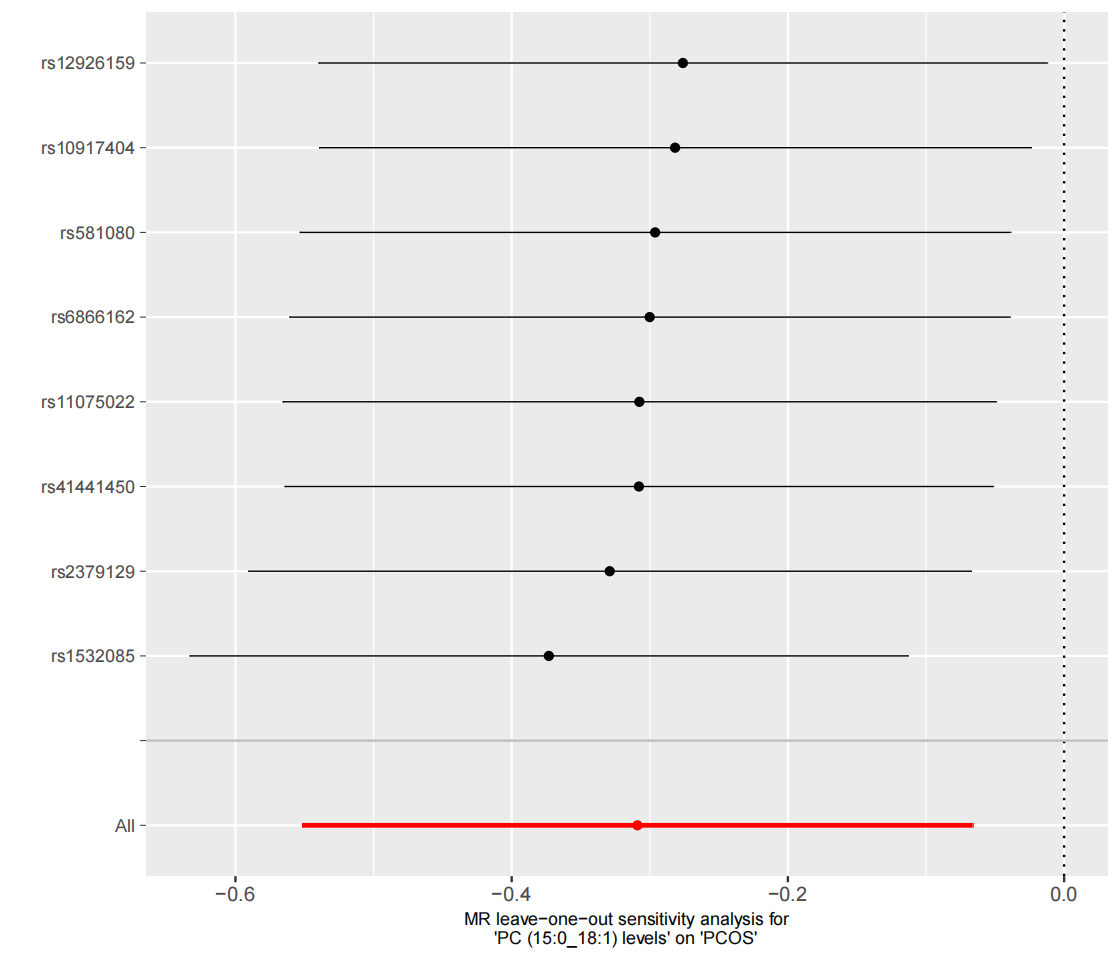


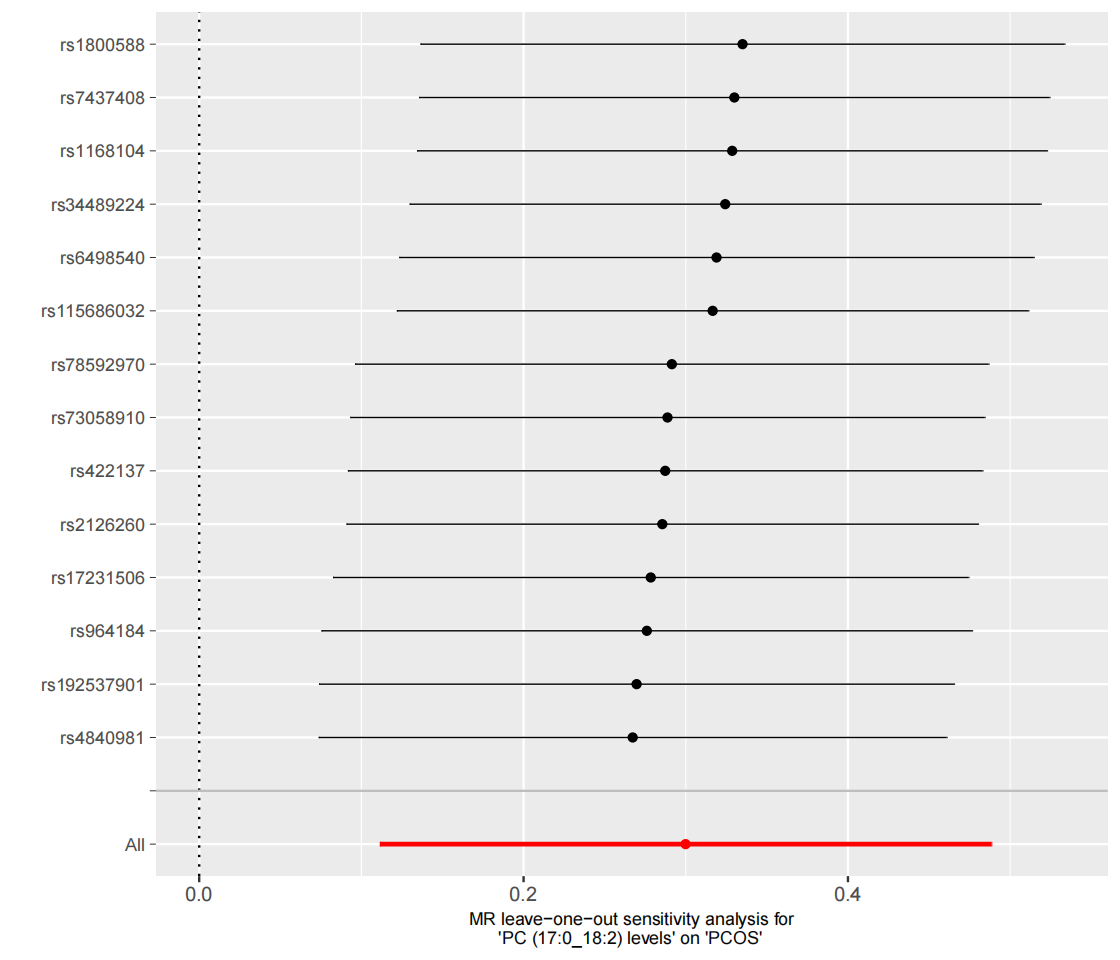

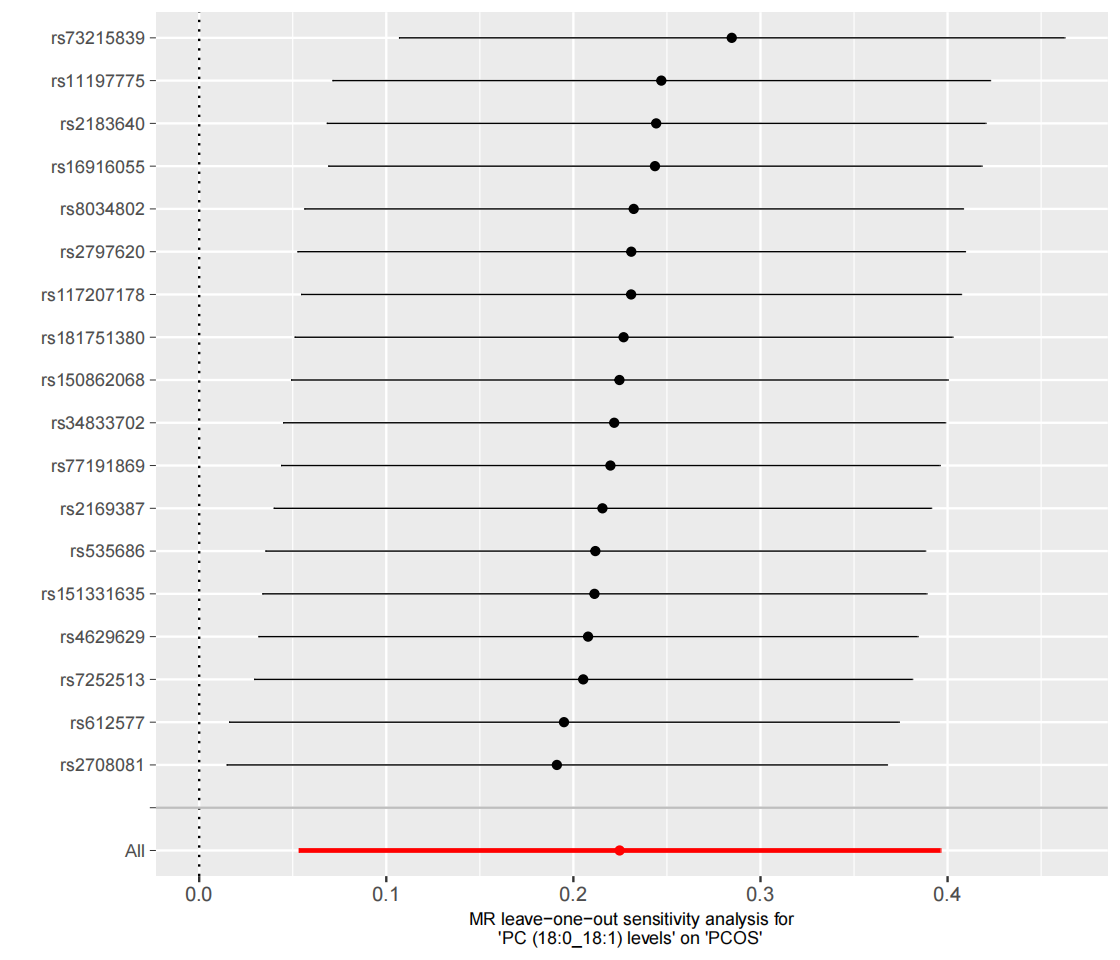


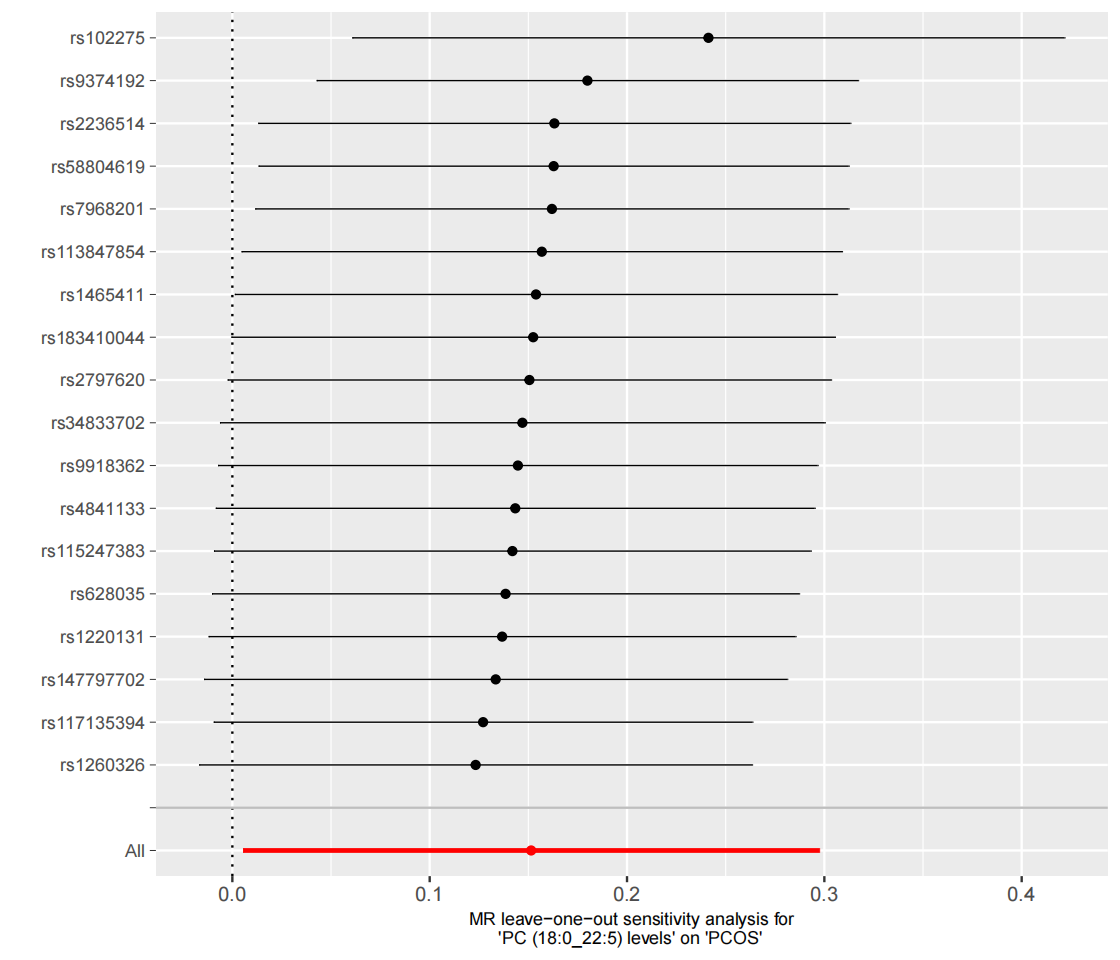

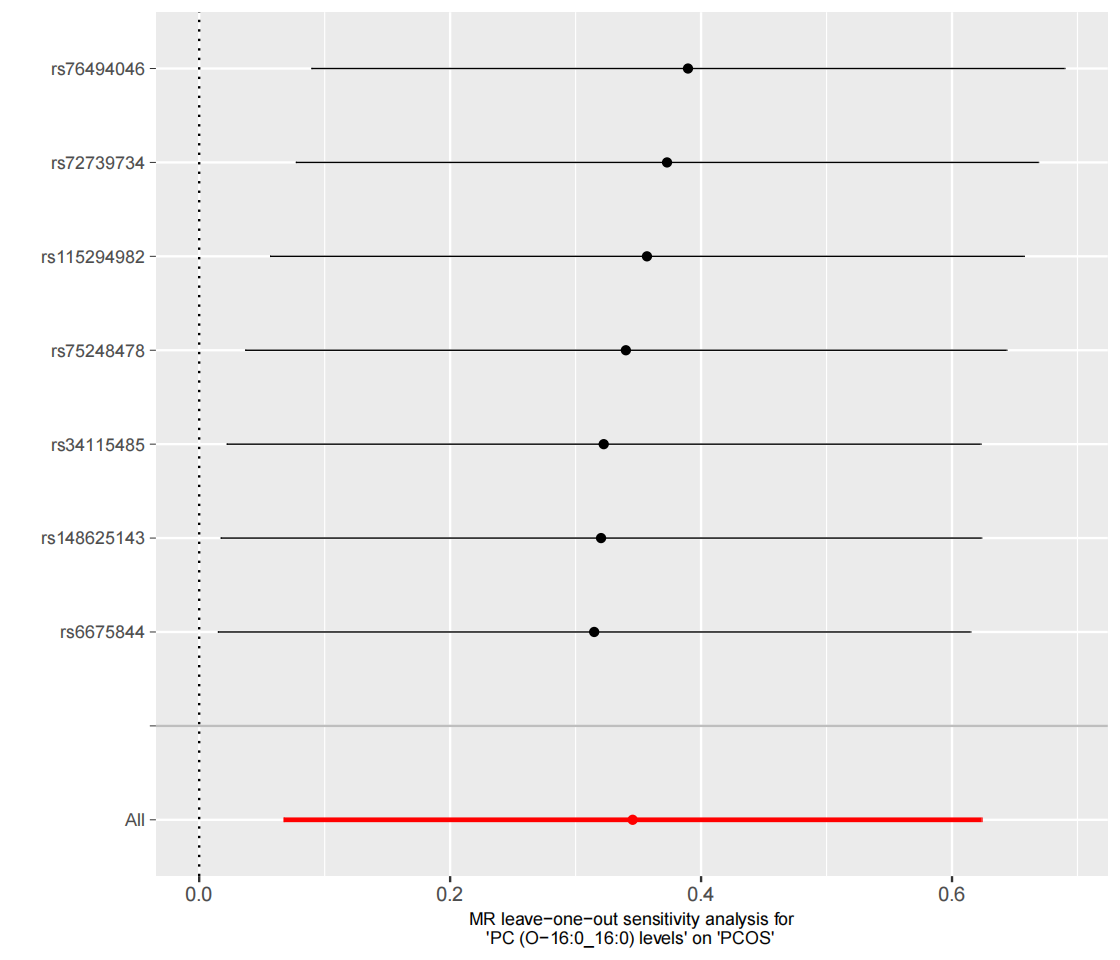


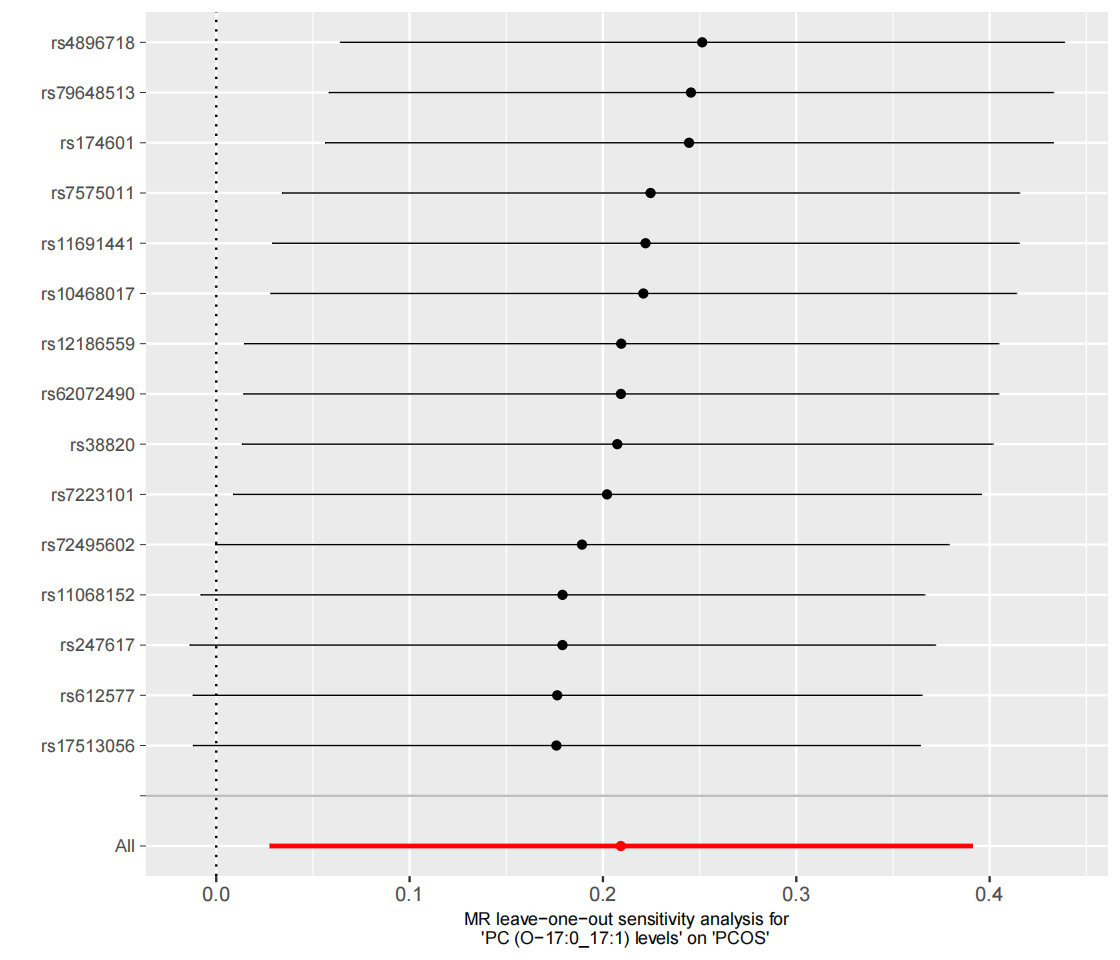

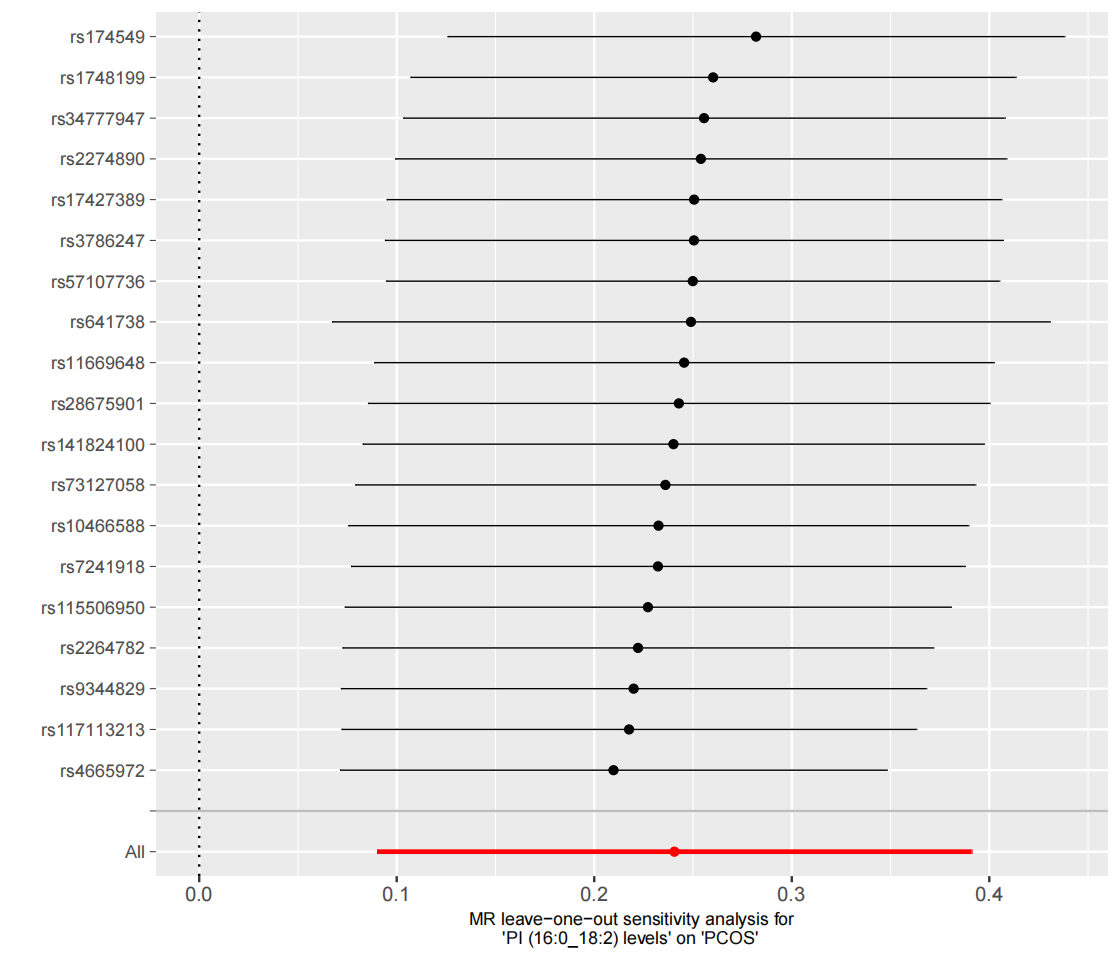


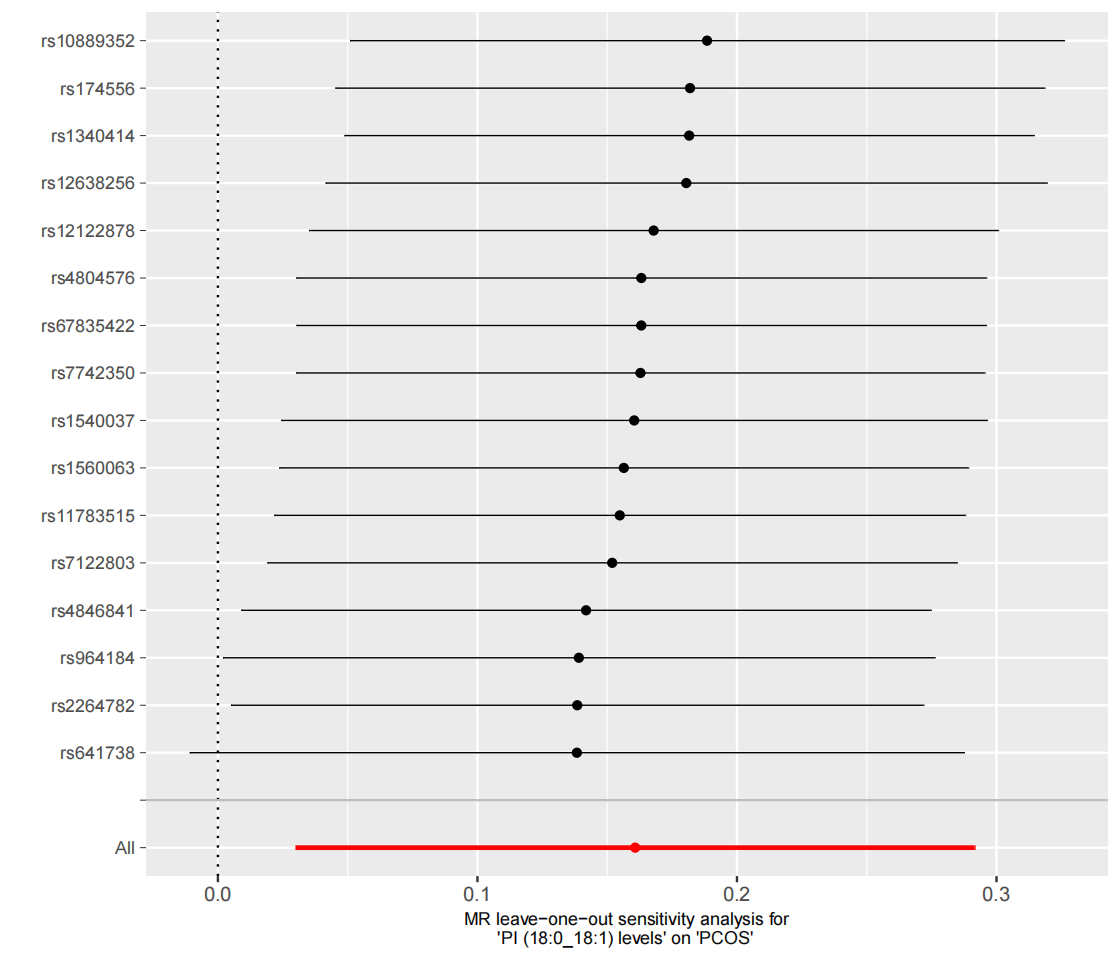

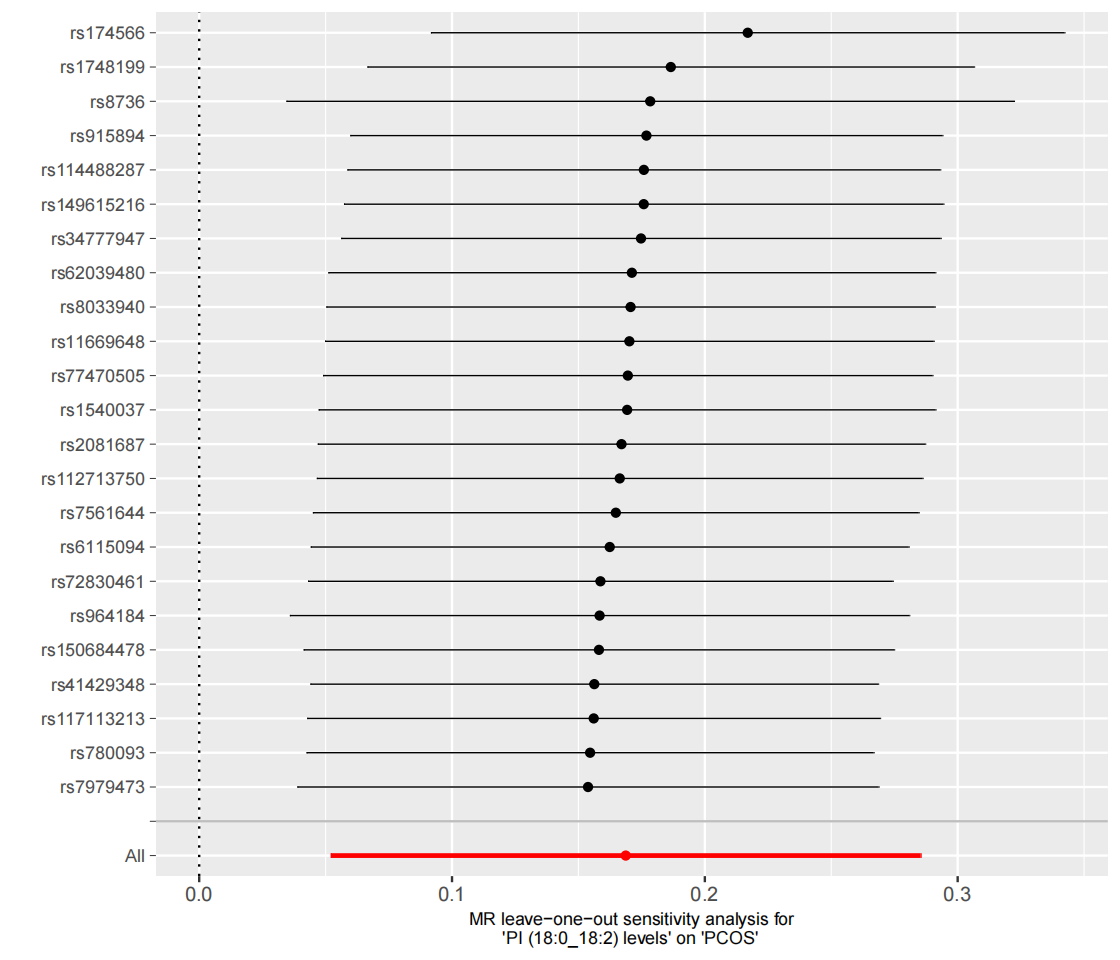

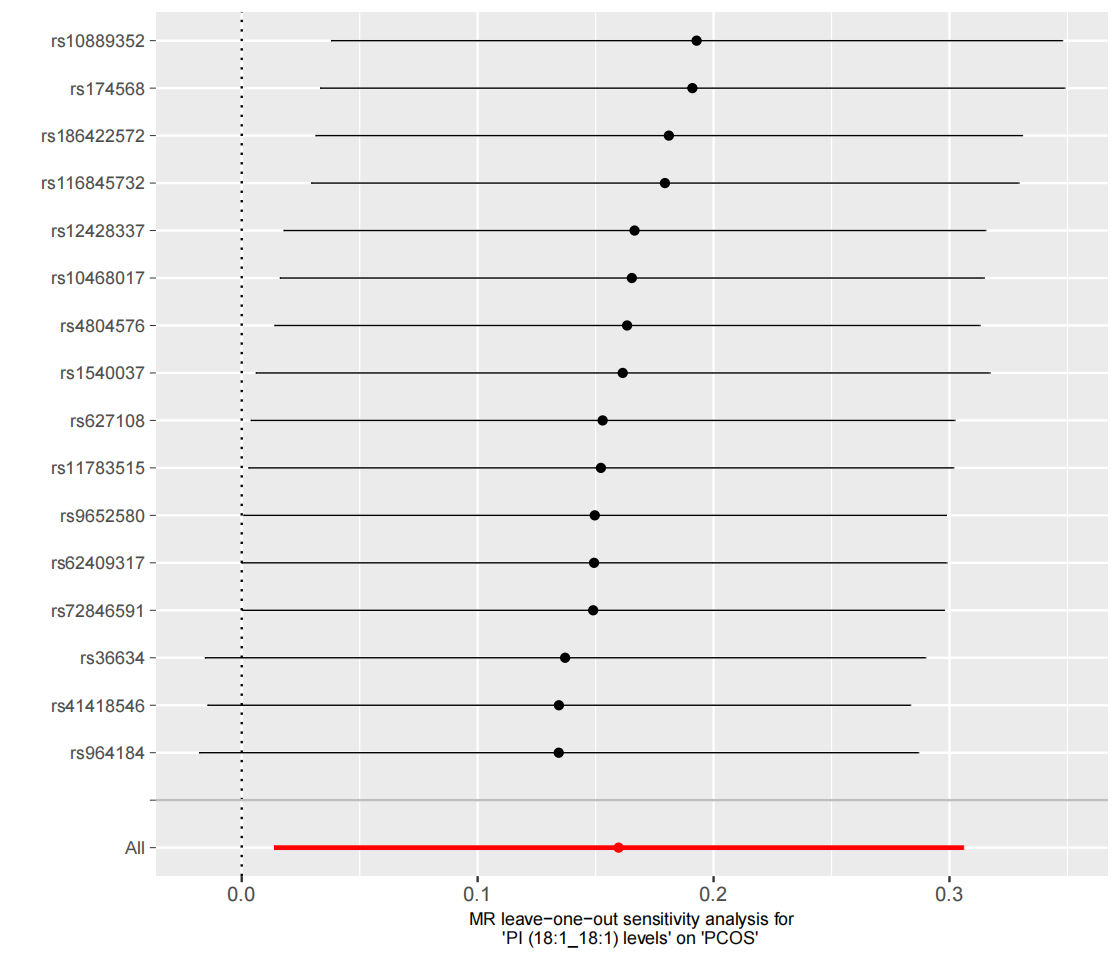

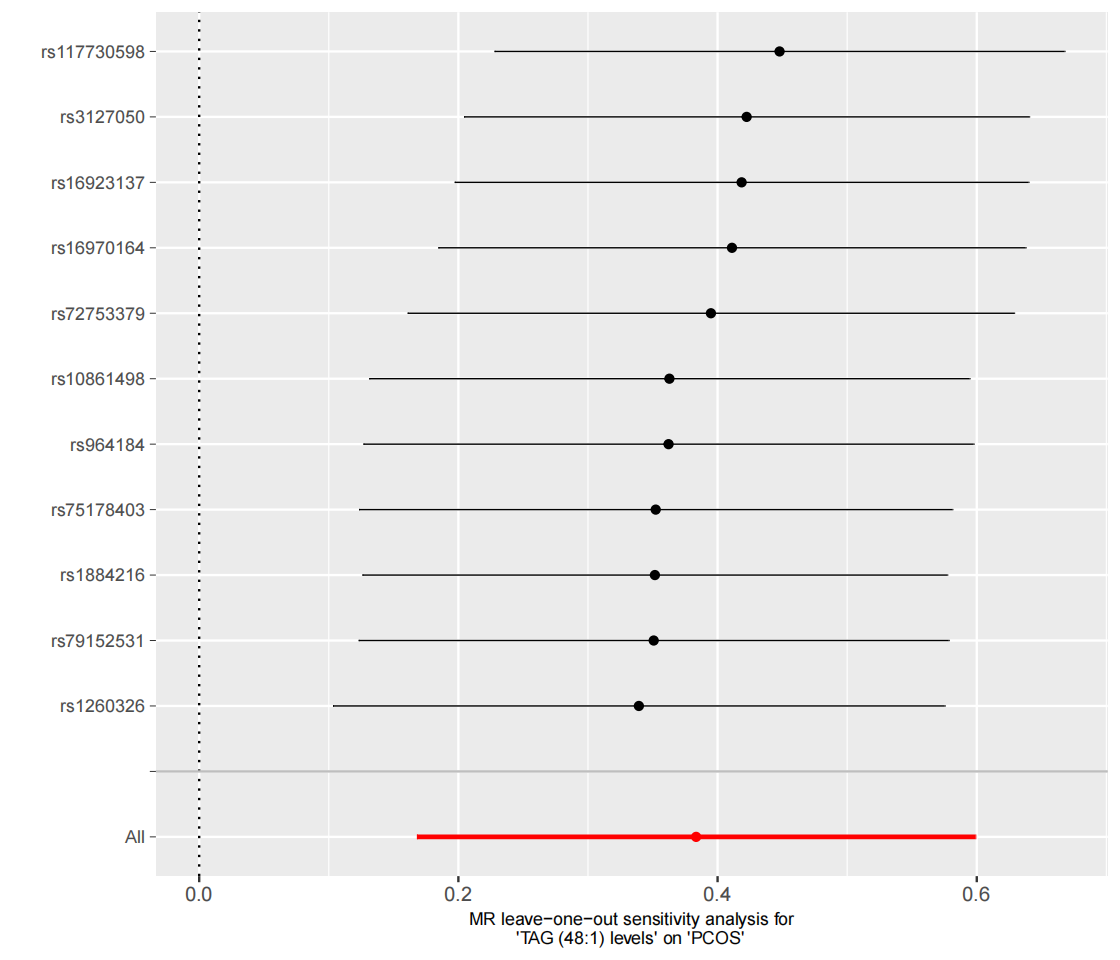

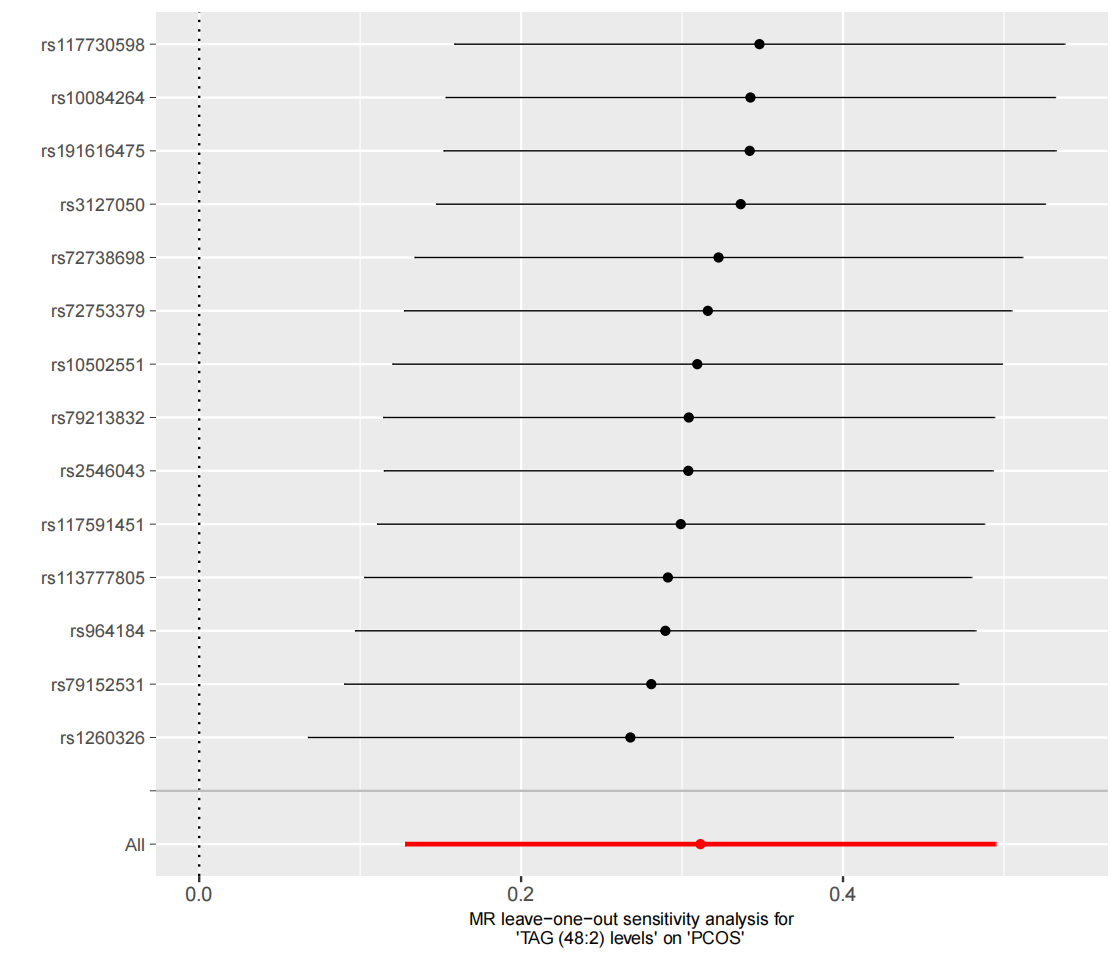

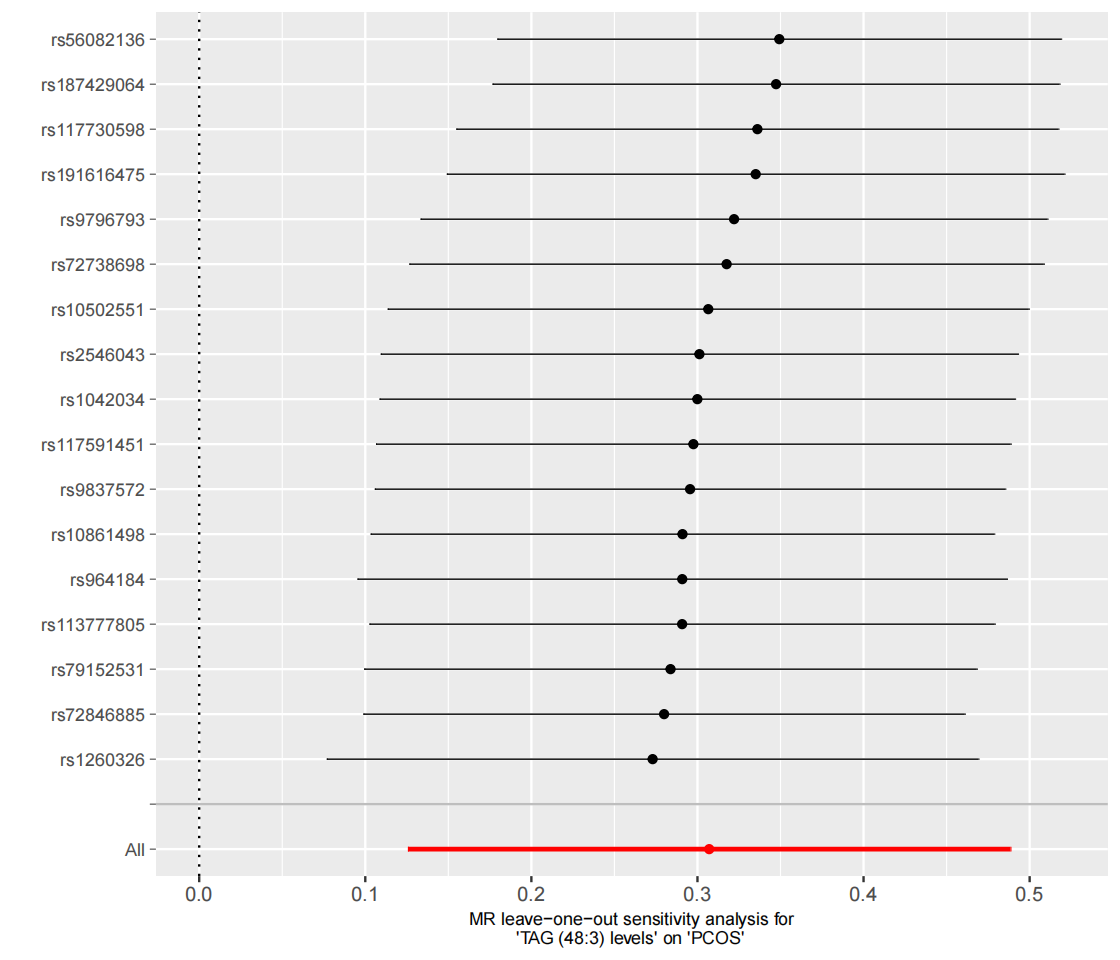

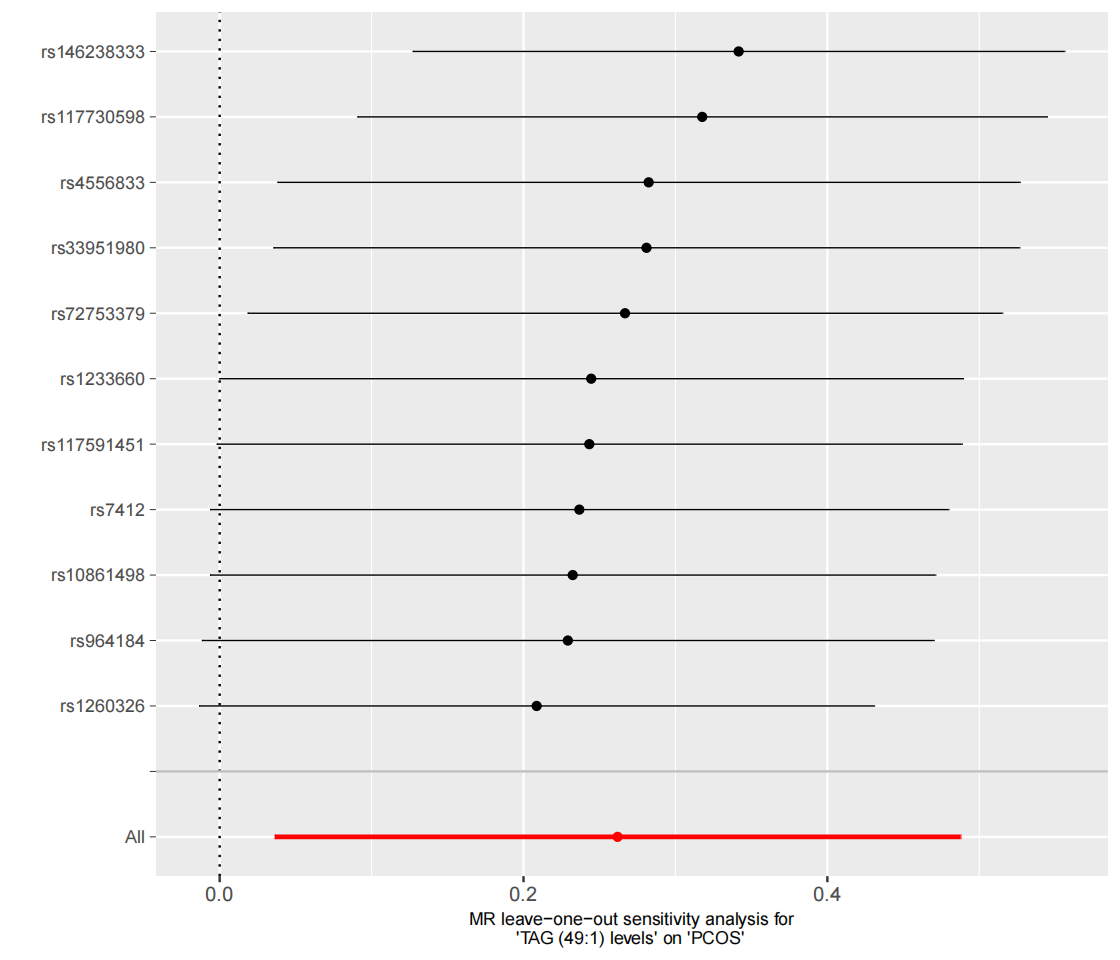

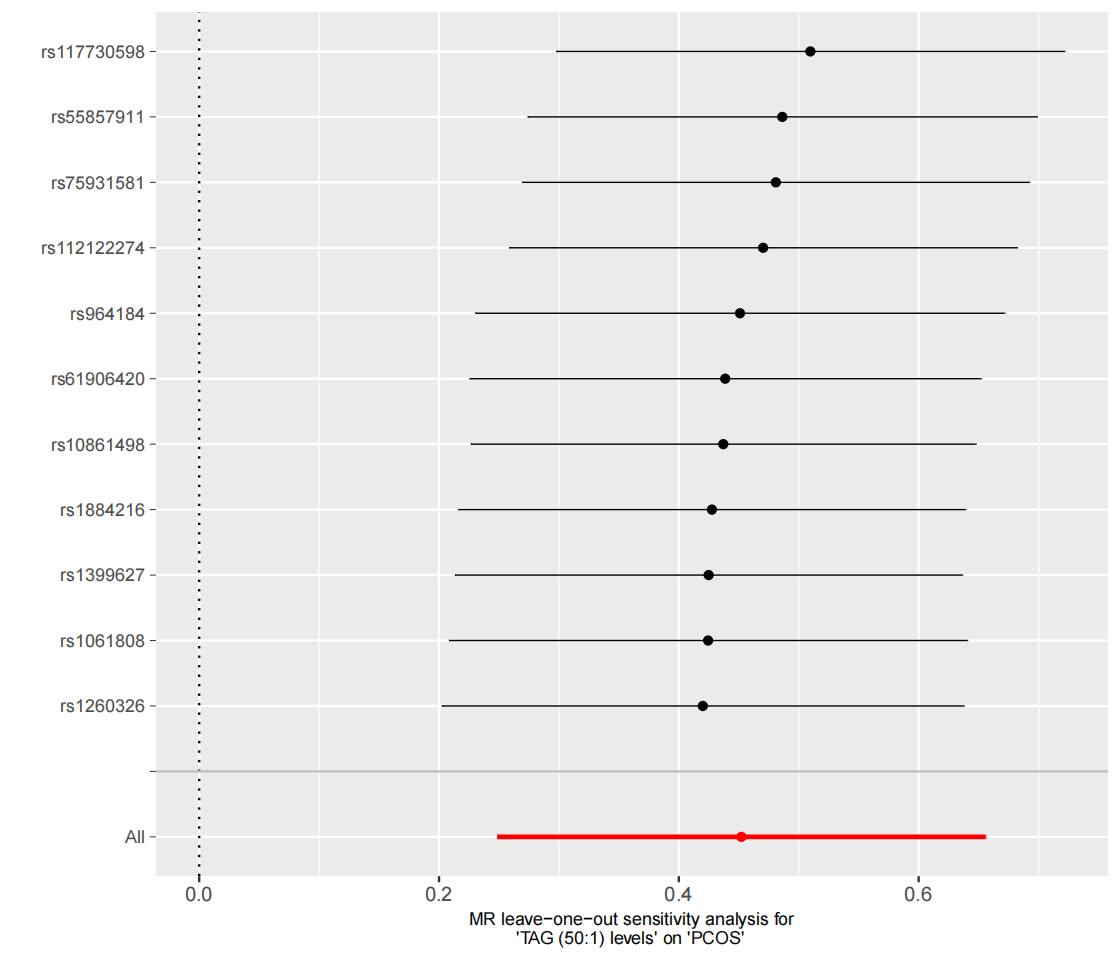

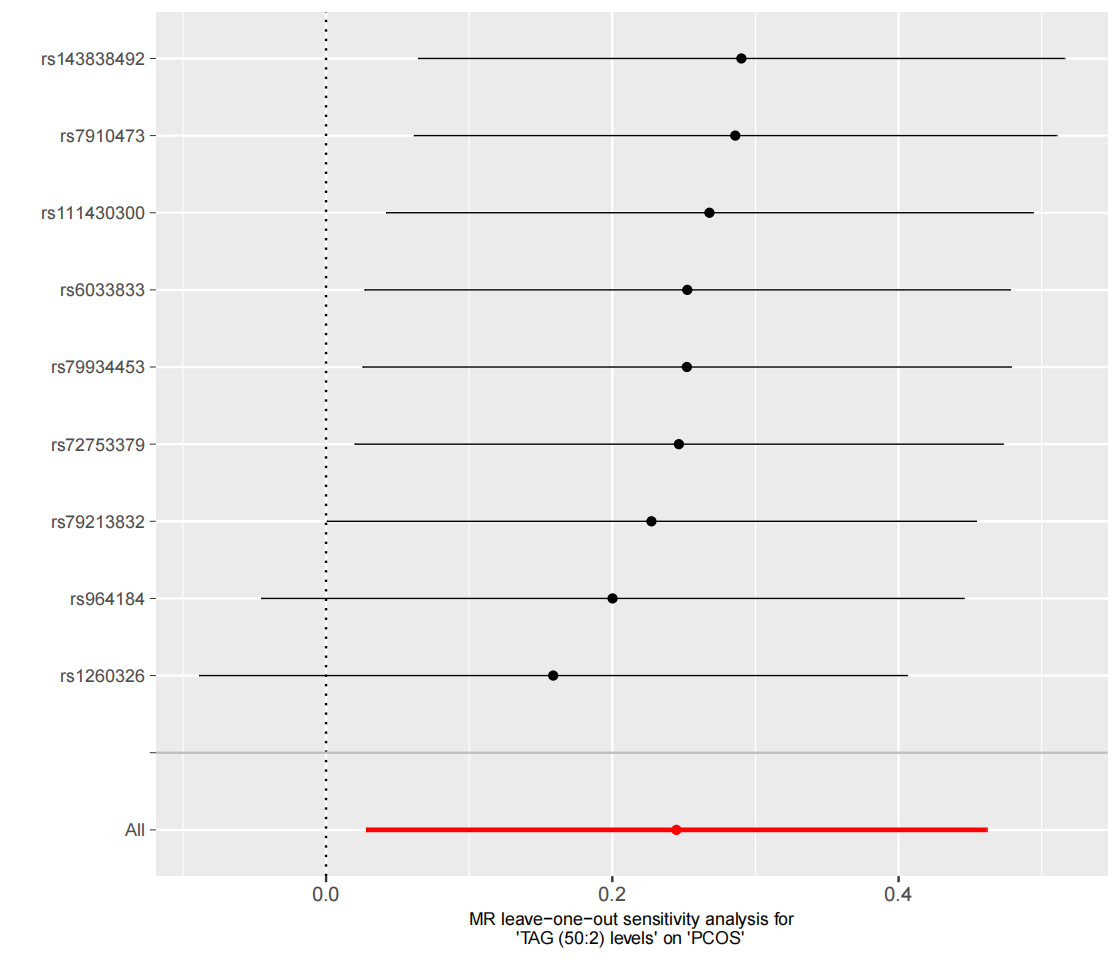

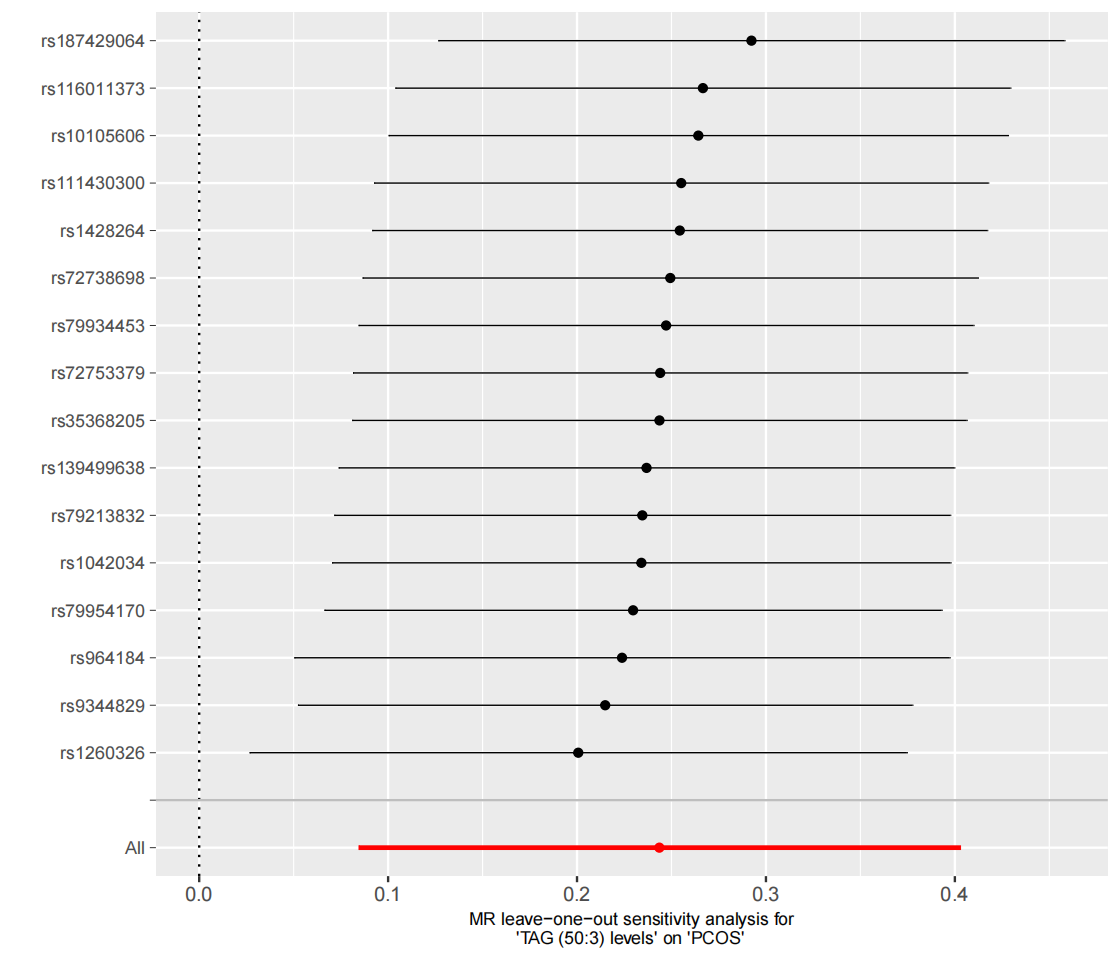

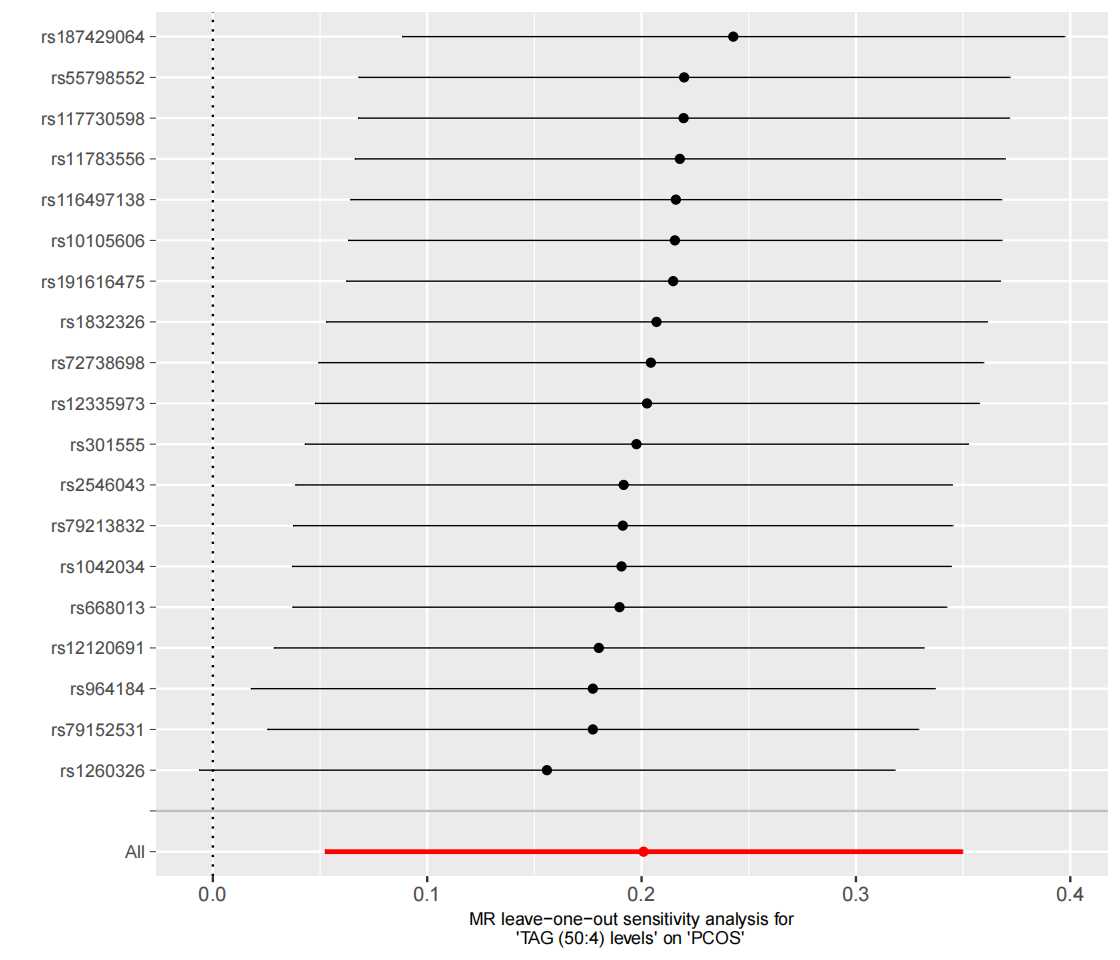

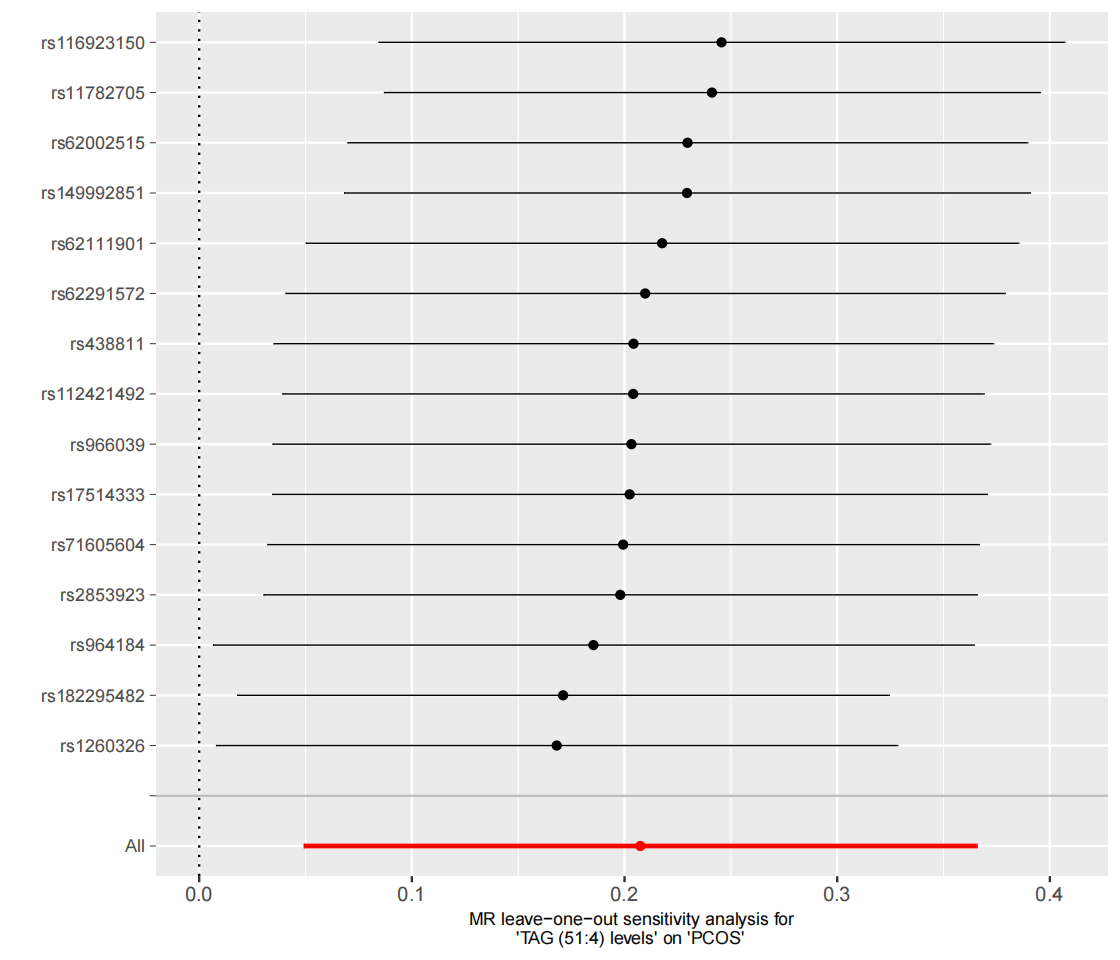

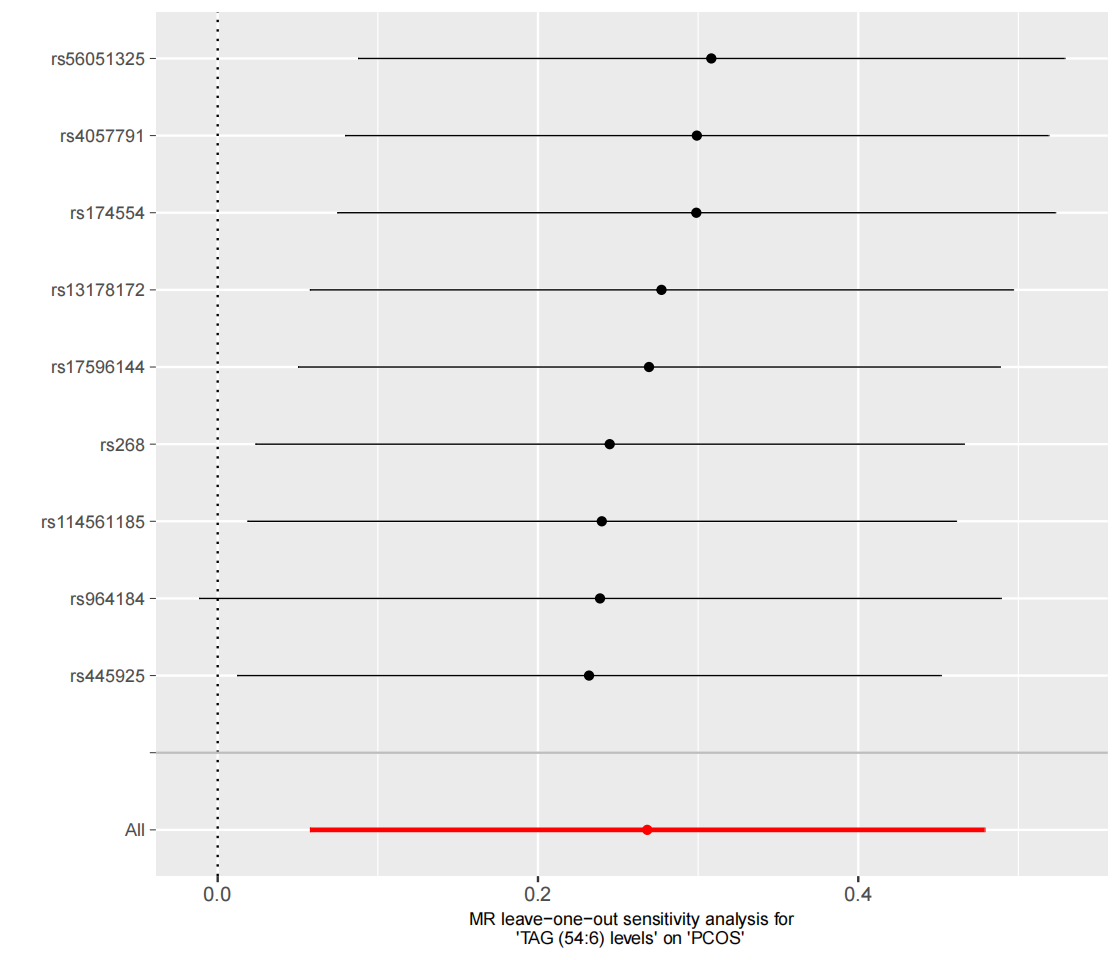

Supplement: Supplementary file 1 [file 531967%20Revised%20Supplementary%20Tables.docx]
